# Supplementary material for: Extracellular Vesicles Induce an Aggressive Phenotype in Luminal Breast Cancer Cells Via PKM2 Phosphorylation
Source: Front Oncol. 2021 Dec 13;11:785450. doi: 10.3389/fonc.2021.785450 (PMC8710663; doi:10.3389/fonc.2021.785450)
Supplement: Supplementary file 2 [file DataSheet_2.xlsx]

## Sheet: Data
Filter: 51219			Fold change	p-value	Average of normalized data (log2)		Normalized data (log2)						Raw data (FPKM)						Annotation										Transcript information
ID	Gene Symbol	Transcript ID	MCF-7_co-MDA /MCF-7_control	MCF-7_co-MDA /MCF-7_control	MCF-7_control	MCF-7_co-MDA	MCF-7_control_1	MCF-7_control_2	MCF-7_control_3	MCF-7_co-MDA_1	MCF-7_co-MDA_2	MCF-7_co-MDA_3	MCF-7_control_1	MCF-7_control_2	MCF-7_control_3	MCF-7_co-MDA_1	MCF-7_co-MDA_2	MCF-7_co-MDA_3	Entrez ID	chromosome	start	end	width	strand	Biotype	Aliases	p_id	Description	NCBI search
1	A2M	NM_000014	1.02937	0.708983	0.531691	0.573447	0.67293	0.394501	0.51407	0.60712	0.440312	0.663674	0.596388	0.312274	0.428579	0.522341	0.354432	0.588666	2	chr12	9220304	9268558	4653	-	protein_coding	CPAMD5|DKFZp779B086|S863-7	P15056	alpha-2-macroglobulin	NM_000014
2	NAT2	NM_000015	1.0023	0.948346	0.0326875	0.0359978	0	4.30766e-05	0.0958808	1.30582e-05	4.4995e-05	0.105352	0	0	0.0688179	0	0	0.076573	10	chr8	18248755	18258723	1317	+	protein_coding	AAC2|PNAT	P504	N-acetyltransferase 2 (arylamine N-acetyltransferase)	NM_000015
3	ACADM	NM_000016	0.922064	0.269901	2.62012	2.50305	2.44067	2.70967	2.69451	2.4633	2.49255	2.5519	4.44455	5.51524	5.47845	4.50765	4.6029	4.90053	34	chr1	76190032	76229363	2821	+	protein_coding	ACAD1|FLJ18227|FLJ93013|FLJ99884|MCAD|MCADH	P3086	acyl-CoA dehydrogenase, C-4 to C-12 straight chain	NM_000016
4	ACADS	NM_000017	0.865723	0.286647	2.86997	2.66195	3.08809	2.90256	2.57298	2.78978	2.573	2.61376	7.52669	6.44642	4.95551	5.90633	4.92288	5.16111	35	chr12	121163541	121177811	2087	+	protein_coding	ACAD3|SCAD	P6550	acyl-CoA dehydrogenase, C-2 to C-3 short chain	NM_000017
5	ACADVL	NM_000018	1.04639	0.439772	6.37641	6.44182	6.50933	6.3331	6.27645	6.45184	6.48793	6.38377	90.3944	79.2271	76.5916	86.4088	88.3007	83.1117	37	chr17	7120444	7128586	2444	+	protein_coding	ACAD6|LCACD|VLCAD	P25512	acyl-CoA dehydrogenase, very long chain	NM_000018
6	ACAT1	NM_000019	0.889676	0.0898525	3.52766	3.35901	3.48405	3.44604	3.64505	3.37594	3.4167	3.28104	10.2231	9.84919	11.521	9.36707	9.62837	8.78807	38	chr11	107992258	108018891	2134	+	protein_coding	ACAT|MAT|T2|THIL	P2821	acetyl-CoA acetyltransferase 1	NM_000019
7	ACVRL1	NM_000020	0.999995	0.953935	0.000156342	0.000149663	0	0.000237107	0.000231907	0.000241525	0.000207451	0	0	0.000160737	0.000161453	0.000166308	0.000140425	0	94	chr12	52301202	52317145	4470	+	protein_coding	ACVRLK1|ALK-1|ALK1|HHT|HHT2|ORW2|SKR3|TSR-I	P7544	activin A receptor like type 1	NM_000020
8	PSEN1	NM_000021	1.22346	0.362379	2.65423	2.9452	2.60503	2.91605	2.39328	2.82421	3.3232	2.58841	5.10235	6.51612	4.25828	6.0731	8.96824	5.05446	5663	chr14	73603143	73690399	6078	+	protein_coding	AD3|FAD|PS1|S182	P18354	presenilin 1	NM_000021
9	ADA	NM_000022	1.17332	0.0856616	2.91618	3.14678	2.9947	2.88756	2.86286	3.29021	3.14699	2.98726	6.99438	6.3668	6.28097	8.77019	7.81843	6.98193	100	chr20	43248163	43280376	1404	-	protein_coding	.	P33308	adenosine deaminase	NM_000022
10	SGCA	NM_000023	1	1	0	0	0	0	0	0	0	0	0	0	0	0	0	0	6442	chr17	48243366	48253293	1433	+	protein_coding	50-DAG|A2|ADL|DAG2|DMDA2|LGMD2D|SCARMD1|adhalin	P3228	sarcoglycan alpha	NM_000023
11	ADRB2	NM_000024	1	1	0	0	0	0	0	0	0	0	0	0	0	0	0	0	154	chr5	148206156	148208197	2042	+	protein_coding	ADRB2R|ADRBR|B2AR|BAR|BETA2AR	P33894	adrenoceptor beta 2	NM_000024
12	ADRB3	NM_000025	1	1	0	0	0	0	0	0	0	0	0	0	0	0	0	0	155	chr8	37820514	37824184	2646	-	protein_coding	BETA3AR|FLJ99960	P20883	adrenoceptor beta 3	NM_000025
13	ADSL	NM_000026	0.884937	0.144869	4.70109	4.52474	4.86593	4.64601	4.57516	4.4848	4.56638	4.52186	28.2504	23.9191	22.8597	21.3575	22.5747	22.1375	158	chr22	40742504	40762575	1563	+	protein_coding	AMPS|ASASE|ASL	P10122	adenylosuccinate lyase	NM_000026
14	AGA	NM_000027	0.863922	0.181255	3.57822	3.36719	3.47364	3.77279	3.46658	3.28138	3.30532	3.50434	10.1428	12.61	10.0644	8.70899	8.83734	10.4239	175	chr4	178351929	178363657	2148	-	protein_coding	AGU|ASRG|GA	P26609	aspartylglucosaminidase	NM_000027
15	AGL	NM_000028	0.868806	0.373888	0.202954	6.01951e-05	0	0.000133995	0.5391	4.06196e-05	0.000139962	0	0	0	0.453424	0	0	0	178	chr1	100315640	100389579	8238	+	protein_coding	GDE	P26368	amylo-alpha-1, 6-glucosidase, 4-alpha-glucanotransferase	NM_000028
16	AGT	NM_000029	1.00451	0.896415	0.0408784	0.047367	0.0351402	0.0419428	0.0455328	1.66625e-05	0.137661	0	0.0248367	0.0291988	0.0321262	0	0.0994211	0	183	chr1	230838272	230850336	2581	-	protein_coding	ANHU|FLJ92595|FLJ97926|SERPINA8	P22458	angiotensinogen	NM_000029
17	AGXT	NM_000030	0.963205	0.601664	0.238163	0.184077	0.225211	0.201948	0.286019	0.0901295	0.360412	0.0840804	0.169725	0.149171	0.219532	0.0642587	0.282176	0.0609934	189	chr2	241808162	241818536	1598	+	protein_coding	AGT|AGT1|AGXT1|PH1|SPAT|SPT|TLH6	P26840	alanine-glyoxylate aminotransferase	NM_000030
18	ALAD	NM_000031	1.05056	0.138789	3.73047	3.80163	3.75021	3.72035	3.72065	3.86674	3.79386	3.74154	12.4981	12.1196	12.1953	13.5683	12.8034	12.4677	210	chr9	116148592	116163618	3183	-	protein_coding	ALADH|MGC5057|PBGS	P16791	aminolevulinate dehydratase	NM_000031
19	ALAS2	NM_000032	1.00002	0.373851	4.91531e-09	2.40883e-05	0	1.47459e-08	0	7.22484e-05	1.54026e-08	0	0	0	0	4.9709e-05	0	0	212	chrX	55035488	55057497	2134	-	protein_coding	ALAS-E|ALASE|ANH1|ASB|FLJ93603|XLDPP|XLSA	P1969	5'-aminolevulinate synthase 2	NM_000032
20	ABCD1	NM_000033	1.10669	0.102018	3.36515	3.5114	3.48261	3.33607	3.26839	3.56593	3.45733	3.50888	10.2119	9.05202	8.64449	10.8269	9.93234	10.4592	215	chrX	152990323	153010216	3664	+	protein_coding	ABC42|ALD|ALDP|AMN	P28427	ATP binding cassette subfamily D member 1	NM_000033
21	ALDOA	NM_000034	1.53069	0.00759585	2.68247	3.29666	2.9001	2.53884	2.58079	3.16176	3.36045	3.35886	6.48733	4.78323	4.98826	7.93765	9.22662	9.32202	226	chr16	30064411	30081741	3314	+	protein_coding	ALDA|GSD12|MGC10942|MGC17716|MGC17767	P20687	aldolase, fructose-bisphosphate A	NM_000034
22	ALDOB	NM_000035	1	1	0	0	0	0	0	0	0	0	0	0	0	0	0	0	229	chr9	104182842	104198062	2426	-	protein_coding	ALDB|ALDO2	P1310	aldolase, fructose-bisphosphate B	NM_000035
23	AMPD1	NM_000036	0.997942	0.287242	0.020746	0.0177735	0.0250685	0.0188617	0.018298	0.0183258	0.0192945	0.0156977	0.0176576	0.0130026	0.012794	0.0127368	0.013297	0.0111464	270	chr1	115215720	115238239	2406	-	protein_coding	MAD|MADA	P32775	adenosine monophosphate deaminase 1	NM_000036
24	ANK1	NM_000037	1	0.237601	1.29406e-09	6.12829e-06	0	3.88219e-09	0	1.17683e-09	3.68296e-06	1.47007e-05	0	0	0	0	2.466e-06	1.0621e-05	286	chr8	41510744	41754280	8861	-	protein_coding	ANK|SPH1|SPH2	P22053	ankyrin 1	NM_000037
25	APC	NM_000038	0.870911	0.317022	2.15261	1.95321	1.86017	2.33971	2.21612	2.10696	1.97242	1.75913	2.64025	4.0435	3.64982	3.30286	2.90827	2.40534	324	chr5	112043202	112181936	11216	+	protein_coding	BTPS2|DP2|DP2.5|DP3|GS	P18457	adenomatous polyposis coli	NM_000038
26	APOA1	NM_000039	1.08602	0.35975	0.0981934	0.217241	0	0.1382	0.151554	0.333209	0.295973	0	0	0.0997292	0.110931	0.25939	0.226366	0	335	chr11	116706469	116708338	897	-	protein_coding	MGC117399	P18347	apolipoprotein A1	NM_000039
27	APOC3	NM_000040	1.07914	0.373949	2.33124e-05	0.109902	0	6.99359e-05	0	2.12003e-05	0.307371	0	0	0	0	0	0.236222	0	345	chr11	116700624	116703787	533	+	protein_coding	APOCIII|MGC150353	P2369	apolipoprotein C3	NM_000040
28	APOE	NM_000041	1.04451	0.905211	1.48413	1.54697	1.64359	1.42111	1.37303	1.8737	0.00335379	2.03528	2.13138	1.66884	1.59186	2.66115	0.000128623	3.1181	348	chr19	45409006	45412652	1444	+	protein_coding	AD2|LDLCQ5|LPG|MGC1571	P29568	apolipoprotein E	NM_000041
29	APOH	NM_000042	0.951303	0.373888	0.072043	2.04625e-05	0	4.55505e-05	0.206119	1.38081e-05	4.75791e-05	0	0	0	0.153751	0	0	0	350	chr17	64208147	64225556	1201	-	protein_coding	B2G1|BG	P20922	apolipoprotein H	NM_000042
30	FAS	NM_000043	0.868818	0.319015	1.2122	1.00932	1.15762	1.31464	1.1586	0.927146	1.32005	0.714251	1.23518	1.48036	1.23365	0.899873	1.48938	0.647427	355	chr10	90750288	90775542	2689	+	protein_coding	ALPS1A|APO-1|APT1|CD95|FAS1|FASTM|TNFRSF6	P6002	Fas cell surface death receptor	NM_000043
31	AR	NM_000044	1.04072	0.518993	2.17055	2.22812	2.19727	2.23169	2.07822	2.20455	2.12235	2.34834	3.59831	3.67842	3.22618	3.60379	3.33583	4.12153	367	chrX	66763874	66950461	10838	+	protein_coding	AIS|DHTR|HUMARA|HYSP1|KD|NR3C4|SBMA|SMAX1|TFM	P24784	androgen receptor	NM_000044
32	ARG1	NM_000045	0.952244	0.133375	0.0706168	2.00935e-05	0.125759	4.47291e-05	0.0832262	1.35591e-05	4.6721e-05	0	0.0914994	0	0.0594756	0	0	0	383	chr6	131894344	131905472	1671	+	protein_coding	.	P21875	arginase 1	NM_000045
33	ARSB	NM_000046	0.927051	0.472251	1.71476	1.60548	1.55109	1.77545	1.80465	1.75636	1.67064	1.36003	1.93741	2.41164	2.49578	2.37491	2.17192	1.58082	411	chr5	78073037	78281766	5744	-	protein_coding	ASB|G4S|MPS6	P22656	arylsulfatase B	NM_000046
34	ARSE	NM_000047	1	1	0	0	0	0	0	0	0	0	0	0	0	0	0	0	415	chrX	2852673	2886351	2668	-	protein_coding	CDPX|CDPX1|CDPXR|MGC163310	P21551	arylsulfatase E (chondrodysplasia punctata 1)	NM_000047
35	ASL	NM_000048	1.1062	0.351301	3.14367	3.28928	3.03909	3.2325	3.1529	3.21702	3.50815	3.11307	7.24524	8.35728	7.90224	8.28613	10.3278	7.71072	435	chr7	65540776	65558329	2183	+	protein_coding	ASAL	P10651	argininosuccinate lyase	NM_000048
36	ASPA	NM_000049	1.04345	0.373949	1.27958e-05	0.0613682	0	3.8387e-05	0	1.16366e-05	0.176778	0	0	0	0	0	0.129544	0	443	chr17	3377404	3402700	1745	+	protein_coding	ACY2|ASP	P2352	aspartoacylase	NM_000049
37	ASS1	NM_000050	1.37586	0.352953	1.91216	2.37249	2.55251	1.22298	1.62776	2.43388	2.69184	1.87587	4.88098	1.32368	2.09291	4.39734	5.4374	2.69278	445	chr9	133320094	133376661	1848	+	protein_coding	ASS|CTLN1	P12411	argininosuccinate synthase 1	NM_000050
38	ATM	NM_000051	1.09619	0.355427	2.16982	2.30231	1.93189	2.19842	2.34871	2.20414	2.30621	2.39056	2.82635	3.57138	4.09756	3.60242	3.92557	4.27377	472	chr11	108093559	108239826	13147	+	protein_coding	AT1|ATA|ATC|ATD|ATDC|ATE|DKFZp781A0353|MGC74674|TEL1|TELO1	P5182	ATM serine/threonine kinase	NM_000051
39	ATP7A	NM_000052	1.0024	0.986355	1.57056	1.57402	1.46621	1.52596	1.70835	1.73623	1.17367	1.74179	1.76939	1.86989	2.27001	2.32825	1.24749	2.36114	538	chrX	77166153	77305892	8529	+	protein_coding	DSMAX|FLJ17790|MK|MNK|SMAX3	.	ATPase copper transporting alpha	NM_000052
40	ATP7B	NM_000053	1.18729	0.192446	1.21694	1.46461	1.42199	1.30164	0.871019	1.41116	1.40096	1.575	1.68521	1.45728	0.830095	1.65698	1.63211	1.99306	540	chr13	52506806	52585630	6308	-	protein_coding	PWD|WC1|WD|WND	P10815	ATPase copper transporting beta	NM_000053
41	AVPR2	NM_000054	1.09269	0.371968	0.0010009	0.128879	0	0.00300061	0	0.0032152	0.354001	0	4.23915e-06	0.00199343	0	0.0022035	0.27673	0	554	chrX	153167985	153172620	2582	+	protein_coding	ADHR|DI1|DIR|DIR3|MGC126533|MGC138386|NDI|V2R	.	arginine vasopressin receptor 2	NM_000054
42	BCHE	NM_000055	0.94523	0.110435	0.115821	0.0345576	0.0735905	0.0873325	0.184011	2.90228e-05	0.0503316	0.052701	0.0526494	0.0618794	0.136204	0	0.0351163	0.0377732	590	chr3	165490692	165555253	2447	-	protein_coding	CHE1|E1	P12272	butyrylcholinesterase	NM_000055
43	BCKDHB	NM_000056	0.878511	0.236759	2.59466	2.40779	2.57075	2.46116	2.73848	2.5949	2.21771	2.38594	4.95752	4.48365	5.67879	5.03404	3.63031	4.25981	594	chr6	80816344	81055987	1550	+	protein_coding	E1B|FLJ17880|dJ279A18.1	P13715	branched chain keto acid dehydrogenase E1, beta polypeptide	NM_000056
44	BLM	NM_000057	0.875979	0.104854	3.4332	3.24217	3.43844	3.46877	3.39133	3.26215	3.38702	3.05847	9.87328	10.023	9.50193	8.58086	9.41292	7.38967	641	chr15	91260558	91358692	4964	+	protein_coding	BS|MGC126616|MGC131618|MGC131620|RECQ2|RECQL2|RECQL3	P23998	Bloom syndrome RecQ like helicase	NM_000057
45	BRCA2	NM_000059	0.991924	0.944834	3.66581	3.65411	3.3276	3.81545	3.80289	3.55694	3.71907	3.68138	9.07229	13.0162	12.9689	10.7525	12.1067	11.9165	675	chr13	32889617	32973809	11386	+	protein_coding	BRCC2|BROVCA2|FACD|FAD|FAD1|FANCB|FANCD|FANCD1|GLM3|PNCA2	P30234	breast cancer 2	NM_000059
46	BTD	NM_000060	0.712819	0.00947405	3.21265	2.72426	3.0845	3.32651	3.2168	2.62045	2.67244	2.86793	7.50702	8.99079	8.30482	5.14067	5.34414	6.34875	686	chr3	15642859	15687328	3020	+	protein_coding	.	P25670	biotinidase	NM_000060
47	BTK	NM_000061	0.989581	0.373797	0.0151184	8.71924e-06	0	2.48185e-05	0.0448641	2.84715e-06	2.12265e-05	2.08396e-06	0	1.0393e-05	0.0316406	0	7.67517e-06	1.15815e-05	695	chrX	100604435	100645784	3159	-	protein_coding	AGMX1|AT|ATK|BPK|IMD1|MGC126261|MGC126262|PSCTK1|XLA	P16630	Bruton tyrosine kinase	NM_000061
48	SERPING1	NM_000062	1.00002	0.296159	4.57228e-05	7.10897e-05	6.91588e-05	3.71029e-06	6.42984e-05	6.77862e-05	7.15049e-05	7.39781e-05	4.87586e-05	2.44197e-06	4.47921e-05	4.66244e-05	4.82584e-05	5.32011e-05	710	chr11	57365027	57382326	2056	+	protein_coding	C1IN|C1INH|C1NH|HAE1|HAE2	P36009	serpin family G member 1	NM_000062
49	C2	NM_000063	1	1	0	0	0	0	0	0	0	0	0	0	0	0	0	0	717	chr6	31865562	31913451	3151	+	protein_coding	CO2|DKFZp779M0311	P13395	complement component 2	NM_000063
50	C2	NM_000063_1	1	1	0	0	0	0	0	0	0	0	0	0	0	0	0	0	717	chr6	31865562	31913451	3151	+	protein_coding	CO2|DKFZp779M0311	P13395	complement component 2	NM_000063_1
51	C2	NM_000063_2	1	1	0	0	0	0	0	0	0	0	0	0	0	0	0	0	717	chr6	31865562	31913451	3151	+	protein_coding	CO2|DKFZp779M0311	P13395	complement component 2	NM_000063_2
52	C2	NM_000063_3	1	1	0	0	0	0	0	0	0	0	0	0	0	0	0	0	717	chr6	31865562	31913451	3151	+	protein_coding	CO2|DKFZp779M0311	P13395	complement component 2	NM_000063_3
53	C2	NM_000063_4	1	1	0	0	0	0	0	0	0	0	0	0	0	0	0	0	717	chr6	31865562	31913451	3151	+	protein_coding	CO2|DKFZp779M0311	P13395	complement component 2	NM_000063_4
54	C2	NM_000063_5	1	1	0	0	0	0	0	0	0	0	0	0	0	0	0	0	717	chr6	31865562	31913451	3151	+	protein_coding	CO2|DKFZp779M0311	P13395	complement component 2	NM_000063_5
55	C2	NM_000063_6	1	1	0	0	0	0	0	0	0	0	0	0	0	0	0	0	717	chr6	31865562	31913451	3151	+	protein_coding	CO2|DKFZp779M0311	P13395	complement component 2	NM_000063_6
56	C3	NM_000064	1.43191	0.0145954	0.283443	0.801386	0.279874	0.376537	0.187738	0.709929	0.985734	0.689101	0.215338	0.296045	0.139273	0.634744	0.976039	0.616991	718	chr19	6677846	6720693	5132	-	protein_coding	AHUS5|ARMD9|ASP|CPAMD1	P29808	complement component 3	NM_000064
57	C6	NM_000065	1	1	0	0	0	0	0	0	0	0	0	0	0	0	0	0	729	chr5	41142248	41261540	3967	-	protein_coding	.	P25284	complement component 6	NM_000065
58	C8B	NM_000066	1	1	0	0	0	0	0	0	0	0	0	0	0	0	0	0	732	chr1	57394883	57431813	2513	-	protein_coding	MGC163447	P34617	complement component 8, beta polypeptide	NM_000066
59	CA2	NM_000067	0.924197	0.00358751	5.9472	5.83348	5.95038	5.94852	5.94271	5.8441	5.79582	5.85974	61.0375	60.458	60.5662	56.3599	54.2702	57.4918	760	chr8	86376131	86393721	1666	+	protein_coding	CA-II|CAII|Car2	P15617	carbonic anhydrase 2	NM_000067
60	CACNA1A	NM_000068	0.998105	0.520865	0.00375895	0.00102305	0	2.954e-06	0.0112447	0.00306391	3.08556e-06	0	0	0	0.00784319	0.00211569	0	0	773	chr19	13317256	13617274	8797	-	protein_coding	APCA|CACNL1A4|CAV2.1|EA2|FHM|HPCA|MHP|MHP1|SCA6	P6582	calcium voltage-gated channel subunit alpha1 A	NM_000068
61	CACNA1S	NM_000069	1.00446	0.373949	1.3074e-06	0.00641782	0	3.92219e-06	0	1.18896e-06	0.0191673	0	0	0	0	0	0.0132233	0	779	chr1	201008640	201081694	6168	-	protein_coding	CACNL1A3|CCHL1A3|Cav1.1|HOKPP|HOKPP1|MHS5|TTPP1|hypoPP	P27167	calcium voltage-gated channel subunit alpha1 S	NM_000069
62	CAPN3	NM_000070	1	1	0	0	0	0	0	0	0	0	0	0	0	0	0	0	825	chr15	42651698	42704515	3662	+	protein_coding	CANP3|CANPL3|LGMD2|LGMD2A|MGC10767|MGC11121|MGC14344|MGC4403|nCL-1|p94	P5251	calpain 3	NM_000070
63	CBS	NM_000071	1.10328	0.247779	4.90126	5.04305	5.08032	4.86418	4.73835	5.12003	5.00743	4.99849	32.9398	27.9836	25.718	33.7265	31.005	31.1939	875	chr21	44473301	44496472	2514	-	protein_coding	HIP4	P7469	cystathionine-beta-synthase	NM_000071
64	CD36	NM_000072	0.833465	0.0381387	0.263761	0.000954879	0.284682	0.383464	0.109965	0.00137223	0.00149193	0	0.21897	0.302973	0.079334	0.000909379	0.000889298	0	948	chr7	80231504	80308593	5836	+	protein_coding	CHDS7|FAT|GP3B|GP4|GPIV|PASIV|SCARB3	P34851	CD36 molecule	NM_000072
65	CD3G	NM_000073	0.975095	0.683318	0.0749242	0.0385385	0.21396	7.14863e-05	0	0.112589	7.46698e-05	0	0.160487	0	0	0.0809854	0	0	917	chr11	118215059	118224497	1311	+	protein_coding	CD3-GAMMA|FLJ17620|FLJ17664|FLJ79544|FLJ94613|MGC138597|T3G	P2256	CD3g molecule	NM_000073
66	CD40LG	NM_000074	1	1	0	0	0	0	0	0	0	0	0	0	0	0	0	0	959	chrX	135730336	135742549	1833	+	protein_coding	CD154|CD40L|HIGM1|IGM|IMD3|T-BAM|TNFSF5|TRAP|gp39|hCD40L	P8369	CD40 ligand	NM_000074
67	CDK4	NM_000075	0.901995	0.0927818	7.09904	6.95023	7.20343	7.09928	6.98626	6.94316	6.98127	6.92571	146.866	135.449	125.908	121.872	124.702	121.466	1019	chr12	58141510	58146230	2002	-	protein_coding	CMM3|MGC14458|PSK-J3	P2239	cyclin-dependent kinase 4	NM_000075
68	CDKN1C	NM_000076	1.13886	0.501757	0.155323	0.342909	0.423071	0.000337267	0	0.678673	0.000352285	0.267864	0.341983	0	0	0.599917	0	0.206021	1028	chr11	2904448	2906995	1758	-	protein_coding	BWCR|BWS|KIP2|WBS|p57	P32251	cyclin-dependent kinase inhibitor 1C	NM_000076
69	CDKN2A	NM_000077	1	1	0	0	0	0	0	0	0	0	0	0	0	0	0	0	1029	chr9	21967751	21994490	2228	-	protein_coding	ARF|CDK4I|CDKN2|CMM2|INK4|INK4A|MLM|MTS-1|MTS1|P14|P14ARF|P16|P16-INK4A|P16INK4|P16INK4A|P19|P19ARF|TP16	P12679	cyclin-dependent kinase inhibitor 2A	NM_000077
70	CETP	NM_000078	1	1	0	0	0	0	0	0	0	0	0	0	0	0	0	0	1071	chr16	56995835	57017756	1717	+	protein_coding	HDLCQ10	P2448	cholesteryl ester transfer protein	NM_000078
71	CHRNA1	NM_000079	1.00937	0.741527	0.0313635	0.0448222	0.0920716	4.75104e-05	0	0.0707027	0.0627298	0	0.0662388	0	0	0.0501006	0.0440354	0	1134	chr2	175612323	175629200	2056	-	protein_coding	ACHRA|ACHRD|CHRNA|CMS2A|FCCMS|SCCMS	P32705	cholinergic receptor nicotinic alpha 1 subunit	NM_000079
72	CHRNE	NM_000080	1.08417	0.603819	1.51467	1.63125	1.32887	1.48224	1.70757	1.32749	1.91499	1.59105	1.51801	1.78418	2.26823	1.50699	2.75828	2.02799	1145	chr17	4801064	4806369	2460	-	protein_coding	ACHRE|CMS1D|CMS1E|CMS2A|FCCMS|SCCMS	P18829	cholinergic receptor nicotinic epsilon subunit	NM_000080
73	LYST	NM_000081	1.33559	0.0113711	1.43051	1.84798	1.30086	1.46318	1.51869	1.82151	1.74534	1.96814	1.46982	1.74728	1.8673	2.53085	2.34064	2.93209	1130	chr1	235824331	236047008	16733	-	protein_coding	CHS|CHS1	P11046	lysosomal trafficking regulator	NM_000081
74	ERCC8	NM_000082	1.01079	0.904226	1.85289	1.86837	1.71154	2.07271	1.74624	1.82076	1.90002	1.88314	2.28343	3.19177	2.35729	2.5287	2.7179	2.70897	1161	chr5	60169659	60240905	2552	-	protein_coding	CKN1|CSA	P33772	excision repair cross-complementation group 8	NM_000082
75	CLCN1	NM_000083	0.999999	0.988934	4.87914e-05	4.77838e-05	0	0.000146369	0	1.76353e-08	0.000143329	0	0	9.91403e-05	0	0	9.69738e-05	0	1180	chr7	143013219	143049097	3175	+	protein_coding	CLC1|MGC138361|MGC142055	P3570	chloride voltage-gated channel 1	NM_000083
76	CLCN5	NM_000084	0.935399	0.373385	0.0964866	0.0001409	0	0.000521359	0.271591	0.000177168	0.000245521	0	0	0.000312467	0.207347	0.000109129	0.000122729	0	1184	chrX	49687225	49863892	10294	+	protein_coding	CLC5|CLCK2|DENTS|NPHL1|NPHL2|XLRH|XRN|hCIC-K2|hClC-K2	P13817	chloride voltage-gated channel 5	NM_000084
77	CLCNKB	NM_000085	1	0.373948	5.60028e-10	2.81099e-06	0	1.68008e-09	0	5.09294e-10	8.43243e-06	0	0	0	0	0	5.66362e-06	0	1188	chr1	16370231	16383821	3191	+	protein_coding	CLCKB|ClC-K2|ClC-Kb|MGC24087|hClC-Kb	P19211	chloride voltage-gated channel Kb	NM_000085
78	CLN3	NM_000086	1.04132	0.645499	4.51985	4.57826	4.64698	4.54691	4.35002	4.42738	4.58556	4.70817	24.1331	22.2645	19.4127	20.4851	22.8917	25.3203	1201	chr16	28477974	28503623	2691	-	protein_coding	BTS|JNCL|MGC102840	P24177	ceroid-lipofuscinosis, neuronal 3	NM_000086
79	CNGA1	NM_000087	0.990033	0.802615	0.162656	0.148204	0.184821	0.216944	0.0828282	0.0970186	0.127557	0.217311	0.137319	0.161215	0.0592076	0.0693644	0.0916474	0.164136	1259	chr4	47937994	48014961	2988	-	protein_coding	CNCG|CNCG1|CNG1|RCNC1|RCNCa|RCNCalpha|RP49	P18293	cyclic nucleotide gated channel alpha 1	NM_000087
80	COL1A1	NM_000088	1.24088	0.0399356	1.31957	1.63093	1.40161	1.32292	1.229	1.58574	1.50718	1.78544	1.64792	1.49329	1.3456	1.99863	1.8327	2.46366	1277	chr17	48261457	48279000	5927	-	protein_coding	OI4	P1401	collagen type I alpha 1	NM_000088
81	COL1A2	NM_000089	1.00532	0.373809	1.60344e-06	0.00766196	0	4.81033e-06	0	1.45818e-06	5.02455e-06	0.0228585	0	0	0	0	0	0.016218	1278	chr7	94023873	94060544	5411	+	protein_coding	OI4	P1497	collagen type I alpha 2	NM_000089
82	COL3A1	NM_000090	1.03444	0.459539	4.60397	4.65281	4.66093	4.57205	4.57718	4.72968	4.55241	4.67075	24.3783	22.6724	22.8932	25.4946	22.347	24.6495	1281	chr2	189839099	189877472	5490	+	protein_coding	EDS4A|FLJ34534	P11863	collagen type III alpha 1	NM_000090
83	COL4A3	NM_000091	0.983387	0.418099	0.0791831	0.0550136	0.103355	0.025522	0.107209	0.0483259	0.0571149	0.0595759	0.0746567	0.0176093	0.0772574	0.0339573	0.0399736	0.0427599	1285	chr2	228029281	228179508	8097	+	protein_coding	.	P16577	collagen type IV alpha 3	NM_000091
84	COL4A4	NM_000092	0.994642	0.639114	0.0693771	0.0616267	0.0651708	0.0587127	0.0841267	0.0501301	0.0878649	0.0465205	0.0464953	0.0411387	0.0601437	0.0352493	0.0622573	0.0332822	1286	chr2	227867427	228029275	10341	-	protein_coding	CA44	P17769	collagen type IV alpha 4	NM_000092
85	COL5A1	NM_000093	0.980764	0.818216	3.6863	3.65828	3.6952	3.61887	3.74216	3.76701	3.42106	3.76039	11.9927	11.2286	12.3932	12.5953	9.65767	12.6426	1289	chr9	137533651	137736688	8508	+	protein_coding	.	P16877	collagen type V alpha 1	NM_000093
86	COL7A1	NM_000094	1.07242	0.324017	0.528042	0.628911	0.544199	0.546102	0.493205	0.781177	0.493081	0.597613	0.460058	0.457389	0.408071	0.717476	0.404755	0.517543	1294	chr3	48601506	48632593	9169	-	protein_coding	EBD1|EBDCT|EBR1	P360	collagen type VII alpha 1	NM_000094
87	COMP	NM_000095	0.961511	0.122699	0.0566409	1.60392e-05	0.0734741	3.57041e-05	0.0947113	1.08233e-05	3.72942e-05	0	0.052532	0	0.0679499	0	0	0	1311	chr19	18893583	18902114	2452	-	protein_coding	EDM1|EPD1|MED|MGC131819|MGC149768|PSACH|THBS5	P12022	cartilage oligomeric matrix protein	NM_000095
88	CP	NM_000096	1.15057	0.0882316	1.2509	1.45325	1.1614	1.28806	1.29922	1.36159	1.59544	1.39132	1.24159	1.43422	1.46249	1.56722	2.01209	1.63554	1356	chr3	148880197	148939832	5233	-	protein_coding	CP-2	.	ceruloplasmin (ferroxidase)	NM_000096
89	CPOX	NM_000097	1.04768	0.437253	2.97775	3.04494	2.9213	2.99318	3.01704	3.04609	2.91557	3.1626	6.59802	6.92734	7.10196	7.24884	6.51014	8.01108	1371	chr3	98298290	98312455	2709	-	protein_coding	CPO|CPX|HCP	P5091	coproporphyrinogen oxidase	NM_000097
90	CPT2	NM_000098	1.00201	0.968854	3.53591	3.5388	3.59103	3.55085	3.46288	3.61828	3.57057	3.42022	11.0871	10.6665	10.0362	11.2637	10.8249	9.77912	1376	chr1	53662101	53679869	3094	+	protein_coding	CPT1|CPTASE	P28933	carnitine palmitoyltransferase 2	NM_000098
91	CST3	NM_000099	0.952101	0.479371	8.05325	7.98244	8.2026	7.93633	8.00749	7.9155	8.04662	7.98221	294.569	242.742	256.579	240.076	262.053	253.715	1471	chr20	23608534	23618685	2541	-	protein_coding	ARMD11|MGC117328	P4492	cystatin C	NM_000099
92	CSTB	NM_000100	1.0026	0.969751	7.37319	7.37694	7.38794	7.32898	7.40161	7.2476	7.54263	7.3241	167.044	158.995	168.247	150.739	184.499	160.414	1476	chr21	45193546	45196256	940	-	protein_coding	CST6|EPM1|PME|STFB	P21176	cystatin B	NM_000100
93	CYBA	NM_000101	1.02149	0.844076	8.66115	8.69182	8.85706	8.64065	8.45801	8.50033	8.79086	8.76666	464.236	396.148	350.993	360.579	439.636	437.728	1535	chr16	88709697	88717492	723	-	protein_coding	p22-PHOX	P10153	cytochrome b-245 alpha chain	NM_000101
94	CYP17A1	NM_000102	0.977005	0.373887	0.0335714	9.4497e-06	0.0984382	2.10356e-05	0	6.37666e-06	2.19724e-05	0	0.070954	0	0	0	0	0	1586	chr10	104590288	104597290	1870	-	protein_coding	CPT7|CYP17|P450C17|S17AH	P896	cytochrome P450 family 17 subfamily A member 1	NM_000102
95	CYP19A1	NM_000103	0.995301	0.934795	0.185262	0.178467	0.039177	0.221788	0.283761	0.117773	0.202823	0.212923	0.027813	0.165075	0.217615	0.0848293	0.149858	0.160637	1588	chr15	51500254	51630795	4514	-	protein_coding	ARO|ARO1|CPV1|CYAR|CYP19|MGC104309|P-450AROM	P4984	cytochrome P450 family 19 subfamily A member 1	NM_000103
96	CYP1B1	NM_000104	0.630376	0.0029798	6.2249	5.55919	6.19362	6.35539	6.11521	5.67573	5.54191	5.45103	72.4272	80.4918	68.3851	50.0401	45.3448	43.0739	1545	chr2	38294746	38303323	5153	-	protein_coding	CP1B|GLC3A|P4501B1	P30309	cytochrome P450 family 1 subfamily B member 1	NM_000104
97	CYP2D6	NM_000106	0.999999	0.185386	3.21176e-05	3.01758e-05	3.16163e-05	3.16132e-05	3.31232e-05	2.85029e-05	3.22671e-05	2.97575e-05	2.2321e-05	2.13116e-05	2.30818e-05	1.959e-05	2.17269e-05	2.14786e-05	1565	chr22	42522501	42526883	1498	-	protein_coding	CPD6|CYP2D|CYP2D7AP|CYP2D7BP|CYP2D7P2|CYP2D8P2|CYP2DL1|CYPIID6|MGC120389|MGC120390|P450-DB1|P450C2D|P450DB1	P28372	cytochrome P450 family 2 subfamily D member 6	NM_000106
98	DDB2	NM_000107	0.983341	0.688993	4.6946	4.67037	4.74888	4.73393	4.59614	4.63065	4.72664	4.65204	25.9732	25.485	23.2093	23.7362	25.3458	24.3211	1643	chr11	47236493	47260769	1848	+	protein_coding	DDBB|FLJ34321|UV-DDB2	P23197	damage specific DNA binding protein 2	NM_000107
99	DLD	NM_000108	0.896672	0.0116348	4.71004	4.55269	4.75538	4.67678	4.6968	4.59308	4.56239	4.50108	26.0942	24.4564	24.9583	23.1005	22.5092	21.8076	1738	chr7	107531552	107561643	3613	+	protein_coding	DLDH|E3|GCSL|LAD|PHE3	P35604	dihydrolipoamide dehydrogenase	NM_000108
100	DMD	NM_000109	1.00037	0.412708	4.8244e-05	0.000575964	0.000144344	3.83663e-07	0	0.0017268	4.0075e-07	0	0.000101756	0	0	0.0011916	0	0	1756	chrX	31137345	33357726	16219	-	protein_coding	BMD|CMD3B|DXS142|DXS164|DXS206|DXS230|DXS239|DXS268|DXS269|DXS270|DXS272	P22354	dystrophin	NM_000109
101	DPYD	NM_000110	0.946566	0.352949	1.58048	1.50125	1.48799	1.59003	1.65834	1.54704	1.38197	1.56766	1.81141	2.00043	2.15859	1.91917	1.59688	1.97913	1806	chr1	97543300	98386615	5616	-	protein_coding	DHP|DHPDHASE|DPD|MGC132008|MGC70799	P23798	dihydropyrimidine dehydrogenase	NM_000110
102	SLC26A3	NM_000111	1.02221	0.373851	6.57174e-06	0.031705	0	1.97151e-05	0	0.0930791	2.05931e-05	0	0	0	0	0.0664974	0	0	1811	chr7	107405912	107443678	2894	-	protein_coding	CLD|DRA	P24851	solute carrier family 26 member 3	NM_000111
103	SLC26A2	NM_000112	0.962372	0.0812415	0.954078	0.898745	0.939244	0.98925	0.933079	0.889662	0.877086	0.928977	0.920837	0.980049	0.910301	0.851307	0.83177	0.911192	1836	chr5	149340300	149366963	8075	+	protein_coding	D5S1708|DTD|DTDST|EDM4|MST153|MSTP157	P34909	solute carrier family 26 member 2	NM_000112
104	TOR1A	NM_000113	0.9619	0.511637	5.56185	5.50581	5.57262	5.65347	5.45239	5.44635	5.60542	5.46021	46.7456	49.0939	42.8275	42.5385	47.4414	43.3431	1861	chr9	132575221	132586441	2106	-	protein_coding	DQ2|DYT1	P30062	torsin family 1 member A	NM_000113
105	EDNRB	NM_000115	1	1	0	0	0	0	0	0	0	0	0	0	0	0	0	0	1910	chr13	78469616	78549664	2878	-	protein_coding	ABCDS|ETB|ETBR|ETRB|HSCR|HSCR2|WS4A	P11964	endothelin receptor type B	NM_000115
106	TAZ	NM_000116	0.566799	0.243409	1.88483	1.06574	1.58212	1.85289	2.16123	0.00917882	0.00321618	2.09461	2.00087	2.60054	3.47565	0.00570853	0	3.29093	6901	chrX	153639854	153650063	1926	+	protein_coding	BTHS|CMD3A|EFE|EFE2|FLJ27390|G4.5|LVNCX|Taz1|XAP-2	P16896	tafazzin	NM_000116
107	EMD	NM_000117	0.94269	0.238646	6.45498	6.36983	6.53647	6.43143	6.3932	6.42412	6.40048	6.28085	92.1296	84.888	83.1312	84.7452	83.0462	77.3238	2010	chrX	153607597	153609883	1339	+	protein_coding	EDMD|LEMD5|STA	P21477	emerin	NM_000117
108	ENG	NM_000118	1.27822	0.359009	0.339345	0.693481	0.235671	0.234734	0.527472	0.259619	0.475022	1.17916	0.17856	0.175055	0.441906	0.19664	0.387408	1.27133	2022	chr9	130577291	130617052	3290	-	protein_coding	CD105|END|FLJ41744|HHT1|ORW|ORW1	P26315	endoglin	NM_000118
109	EPB42	NM_000119	1	1	0	0	0	0	0	0	0	0	0	0	0	0	0	0	2038	chr15	43489426	43513323	2850	-	protein_coding	MGC116735|MGC116737|PA|SPH5	P11741	erythrocyte membrane protein band 4.2	NM_000119
110	EPHX1	NM_000120	0.724523	0.174233	0.465047	0.000150296	0	0.844691	0.427829	0.000101419	0.000349446	0	0	0.792971	0.345558	0	0	0	2052	chr1	225997776	226033262	2409	+	protein_coding	EPHX|EPOX|MEH	P31072	epoxide hydrolase 1	NM_000120
111	EPOR	NM_000121	1.10407	0.261844	1.7224	1.86523	1.84405	1.50968	1.79158	1.81127	1.96408	1.81502	2.59888	1.83669	2.46439	2.50566	2.88724	2.53763	2057	chr19	11487881	11495018	2827	-	protein_coding	EPO-R|MGC138358	.	erythropoietin receptor	NM_000121
112	ERCC3	NM_000122	0.994416	0.741521	4.79644	4.78836	4.77673	4.78093	4.83102	4.7828	4.81574	4.76609	26.5002	26.3605	27.4895	26.4877	27.0235	26.4044	2071	chr2	128014866	128051752	3288	-	protein_coding	BTF2|GTF2H|RAD25|TFIIH|XPB	P11941	excision repair cross-complementation group 3	NM_000122
113	ERCC5	NM_000123	0.975099	0.518779	2.97044	2.93406	2.90247	2.96507	3.04047	2.88574	2.92007	2.99423	6.49916	6.77477	7.23444	6.38096	6.53423	7.01928	2073	chr13	103498191	103498704	514	+	protein_coding	COFS3|ERCM2|UVDR|XPG|XPGC	P18270	excision repair cross-complementation group 5	NM_000123
114	ERCC6	NM_000124	1.04386	0.51622	1.49075	1.55269	1.41449	1.43646	1.61299	1.61597	1.42946	1.60514	1.67176	1.69738	2.06084	2.06209	1.68391	2.05733	2074	chr10	50662526	50714058	7420	-	protein_coding	ARMD5|CKN2|COFS|COFS1|CSB|RAD26	P23807	excision repair cross-complementation group 6	NM_000124
115	ESR1	NM_000125	0.933328	0.463112	5.1586	5.05906	5.00227	5.2004	5.26066	5.07904	4.86927	5.20874	31.1554	35.594	37.3721	32.7527	28.0772	36.2432	2099	chr6	152011631	152424408	7487	+	protein_coding	DKFZp686N23123|ER|ESR|ESRA|Era|NR3A1	P24697	estrogen receptor 1	NM_000125
116	ETFA	NM_000126	0.96398	0.142635	7.39779	7.34487	7.38129	7.37866	7.43278	7.35857	7.2989	7.37601	166.272	164.602	171.943	162.872	155.658	166.325	2108	chr15	76508629	76603810	1354	-	protein_coding	EMA|GA2|MADD	P21106	electron transfer flavoprotein alpha subunit	NM_000126
117	EXT1	NM_000127	0.878382	0.0196566	2.80362	2.61654	2.78677	2.85368	2.76901	2.52682	2.64783	2.67085	5.92029	6.19858	5.82199	4.75532	5.23911	5.40863	2131	chr8	118811602	119124058	3363	-	protein_coding	EXT|LGCR|LGS|TRPS2|TTV	P6836	exostosin glycosyltransferase 1	NM_000127
118	F11	NM_000128	1	1	0	0	0	0	0	0	0	0	0	0	0	0	0	0	2160	chr4	187187118	187210835	3278	+	protein_coding	FXI|MGC141891	P24906	coagulation factor XI	NM_000128
119	F13A1	NM_000129	1.03363	0.459084	0.00998504	0.0577031	0	4.23738e-05	0.0297086	0.166576	4.42608e-05	0	0	0	0.0208509	0.122164	0	0	2162	chr6	6144311	6320924	3863	-	protein_coding	F13A	P16193	coagulation factor XIII A chain	NM_000129
120	F5	NM_000130	0.999895	0.993154	0.0316538	0.0315022	0.0463041	3.94189e-05	0.0481051	0.0425743	0.0254443	0.0264237	0.0328246	0	0.033968	0.0298615	0.0175785	0.0187987	2153	chr1	169481192	169555769	9179	-	protein_coding	FVL|PCCF	P27020	coagulation factor V	NM_000130
121	F7	NM_000131	1.00001	0.970613	0.000236879	0.000250337	0	3.49533e-06	0.000707026	9.03235e-08	0.000750792	0	0	2.14556e-06	0.000492012	0	0.000510297	0	2155	chr13	113760102	113774995	3461	+	protein_coding	.	.	coagulation factor VII	NM_000131
122	F8	NM_000132	0.977783	0.26162	0.150594	0.11818	0.133727	0.159709	0.158199	0.0759566	0.119734	0.157689	0.0976359	0.116215	0.116057	0.0538956	0.0857944	0.11675	2157	chrX	154064064	154250998	9204	-	protein_coding	AHF|DXS1253E|F8B|F8C|FVIII|HEMA	P1735	coagulation factor VIII	NM_000132
123	F9	NM_000133	1	1	0	0	0	0	0	0	0	0	0	0	0	0	0	0	2158	chrX	138612895	138645617	2802	+	protein_coding	FIX|HEMB|MGC129641|MGC129642|PTC	P11507	coagulation factor IX	NM_000133
124	FABP2	NM_000134	1.02757	0.117627	8.12916e-06	0.0392459	0	2.43873e-05	0	0.0619412	0.0550019	0	0	0	0	0.0437583	0.0385089	0	2169	chr4	120238405	120243316	2249	-	protein_coding	FABPI|I-FABP|MGC133132	P5256	fatty acid binding protein 2	NM_000134
125	FANCA	NM_000135	0.989137	0.869187	4.0956	4.07984	3.94737	4.11657	4.21064	4.00204	4.16461	4.06823	14.4765	16.266	17.5317	14.9997	16.8475	15.8919	2175	chr16	89803959	89883065	6342	-	protein_coding	FA|FA-H|FA1|FAA|FACA|FAH|FANCH|MGC75158	P8879	Fanconi anemia complementation group A	NM_000135
126	FANCC	NM_000136	0.90097	0.0520241	3.33785	3.18741	3.23658	3.3892	3.38268	3.22107	3.1889	3.15141	8.45408	9.43172	9.43894	8.31207	8.07603	7.94558	2176	chr9	97861336	98079991	5838	-	protein_coding	FA3|FAC|FACC|FLJ14675	P30055	Fanconi anemia complementation group C	NM_000136
127	FAH	NM_000137	0.963987	0.692364	3.54361	3.49069	3.75921	3.36124	3.48105	3.52694	3.4572	3.4871	12.5801	9.22823	10.176	10.5111	9.93039	10.2892	2184	chr15	80445233	80478924	1797	+	protein_coding	.	P19113	fumarylacetoacetate hydrolase (fumarylacetoacetase)	NM_000137
128	FBN1	NM_000138	0.973646	0.115953	0.914749	0.876218	0.948439	0.888681	0.906472	0.874335	0.865332	0.888888	0.933061	0.84684	0.875375	0.831771	0.816999	0.858667	2200	chr15	48700503	48937985	11695	-	protein_coding	FBN|MASS|MFS1|OCTD|SGS|SSKS|WMS	P24247	fibrillin 1	NM_000138
129	MS4A2	NM_000139	0.999952	0.373887	6.87525e-05	1.93287e-08	0.000206205	4.30268e-08	0	1.3043e-08	4.4943e-08	0	0.000145045	0	0	0	0	0	2206	chr11	59856137	59865940	3648	+	protein_coding	APY|ATOPY|FCER1B|FCERI|IGEL|IGER|IGHER|MS4A1	P8631	membrane spanning 4-domains A2	NM_000139
130	FECH	NM_000140	0.994813	0.917111	1.64527	1.63777	1.62328	1.56098	1.74542	1.55608	1.68252	1.67133	2.088	1.94014	2.35516	1.93739	2.19827	2.20157	2235	chr18	55212073	55253969	7405	-	protein_coding	EPP|FCE	P14070	ferrochelatase	NM_000140
131	FGFR2	NM_000141	1	1	0	0	0	0	0	0	0	0	0	0	0	0	0	0	2263	chr10	123237844	123357972	5128	-	protein_coding	BEK|BFR-1|CD332|CEK3|CFD1|ECT1|FLJ98662|JWS|K-SAM|KGFR|TK14|TK25	P21827	fibroblast growth factor receptor 2	NM_000141
132	FGFR3	NM_000142	0.886342	0.456121	0.309697	0.135632	0	0.303812	0.569432	9.05202e-05	0.000311894	0.373445	0	0.232993	0.484355	0	0	0.297834	2261	chr4	1795039	1810599	4438	+	protein_coding	ACH|CD333|CEK2|HSFGFR3EX|JTK4	P18332	fibroblast growth factor receptor 3	NM_000142
133	FH	NM_000143	0.895632	0.00422373	5.43718	5.27816	5.44795	5.42878	5.43475	5.22893	5.32584	5.27808	42.7917	41.8688	42.294	36.4474	38.906	38.0835	2271	chr1	241660857	241683085	1867	-	protein_coding	HLRCC|LRCC|MCL|MCUL1	P24677	fumarate hydratase	NM_000143
134	FXN	NM_000144	0.927852	0.191484	1.17359	1.06556	1.19451	1.24599	1.07499	1.10018	1.12215	0.969688	1.29307	1.36505	1.10789	1.14196	1.17021	0.966751	2395	chr9	71650479	71715094	7446	+	protein_coding	CyaY|FA|FARR|FRDA|MGC57199|X25	P4451	frataxin	NM_000144
135	FSHR	NM_000145	1	1	0	0	0	0	0	0	0	0	0	0	0	0	0	0	2492	chr2	49189296	49381666	2774	-	protein_coding	FSHRO|LGR1|MGC141667|MGC141668|ODG1	P34446	follicle stimulating hormone receptor	NM_000145
136	FTL	NM_000146	1.01588	0.86739	9.1645	9.18723	9.29965	9.16504	9.01476	9.01436	9.35234	9.17515	631.281	570.228	516.761	515.349	649.28	581.332	2512	chr19	49468566	49470136	871	+	protein_coding	MGC71996|NBIA3	P16958	ferritin, light polypeptide	NM_000146
137	FUCA1	NM_000147	1.01462	0.738853	3.76282	3.78377	3.74451	3.83075	3.71053	3.87129	3.75439	3.72128	12.445	13.1641	12.1031	13.6143	12.4303	12.2804	2517	chr1	24171572	24194859	2117	-	protein_coding	FUCA	P17490	fucosidase, alpha-L- 1, tissue	NM_000147
138	FUT1	NM_000148	1.02997	0.67888	2.64433	2.68694	2.62332	2.71385	2.59307	2.55953	2.84677	2.63907	5.17933	5.5333	5.03884	4.88746	6.16329	5.26867	2523	chr19	49251268	49258647	4246	-	protein_coding	H|HH|HSC	P24502	fucosyltransferase 1 (H blood group)	NM_000148
139	FUT3	NM_000149	0.927381	0.657732	0.353602	0.244835	0.332369	0.474194	0.244911	0.636523	0.000424643	0	0.26016	0.387132	0.18528	0.553834	0	0	2525	chr19	5842899	5851485	2188	-	protein_coding	CD174|FT3B|FucT-III|LE|Les|MGC131739	P12651	fucosyltransferase 3 (Lewis blood group)	NM_000149
140	FUT6	NM_000150	0.999989	0.85622	0.000127683	0.000111296	0.000186383	1.4899e-07	0.000196507	0.000176625	1.55625e-07	0.000157101	0.000131175	0	0.000136816	0.000121586	0	0.000112676	2528	chr19	5830637	5839742	3137	-	protein_coding	FCT3A|FLJ40754|FT1A|Fuc-TVI|FucT-VI	P27056	fucosyltransferase 6	NM_000150
141	G6PC	NM_000151	1.00017	0.373808	5.2469e-08	0.000248315	0	1.57407e-07	0	4.77157e-08	1.64417e-07	0.000744606	0	0	0	0	0	0.000530627	2538	chr17	41052814	41066450	4190	+	protein_coding	G6PT|GSD1|GSD1a|MGC163350	P4056	glucose-6-phosphatase catalytic subunit	NM_000151
142	GAA	NM_000152	1.03872	0.797393	1.92198	1.97679	2.24815	1.61663	1.82821	1.91422	1.89814	2.10838	3.76219	2.05442	2.55362	2.76477	2.71256	3.33561	2548	chr17	78075355	78093679	3590	+	protein_coding	LYAG	P2143	glucosidase alpha, acid	NM_000152
143	GALC	NM_000153	0.944504	0.301872	2.93535	2.85298	2.87953	2.91557	3.00791	2.95705	2.75534	2.83942	6.38061	6.51279	7.05059	6.75529	5.72079	6.20394	2581	chr14	88399358	88460009	4166	-	protein_coding	.	P4572	galactosylceramidase	NM_000153
144	GALK1	NM_000154	0.963764	0.689063	5.23075	5.1775	5.43406	5.19691	5.0329	5.20949	5.11301	5.2079	42.3696	35.5033	31.7695	35.9471	33.4319	36.225	2584	chr17	73754018	73761280	1361	-	protein_coding	GALK|GK1	P14329	galactokinase 1	NM_000154
145	GALT	NM_000155	1.08351	0.646358	2.33665	2.45237	2.50774	2.49493	1.93718	2.10064	2.61629	2.58466	4.70257	4.61449	2.83289	3.28338	5.10671	5.03385	2592	chr9	34646586	34650595	1405	+	protein_coding	.	P32635	galactose-1-phosphate uridylyltransferase	NM_000155
146	GAMT	NM_000156	1.09286	0.276776	2.7114	2.83951	2.89232	2.68732	2.53179	2.86606	2.8406	2.81134	6.44551	5.41316	4.78793	6.28143	6.13161	6.06374	2593	chr19	1397025	1401569	2354	-	protein_coding	PIG2|TP53I2	P3577	guanidinoacetate N-methyltransferase	NM_000156
147	GBA	NM_000157	0.762387	0.0383557	4.3847	3.9933	4.27066	4.50886	4.36456	4.19776	3.9479	3.80678	18.3621	21.665	19.6182	17.3246	14.3538	13.0987	2629	chr1	155204239	155214653	2564	-	protein_coding	GBA1|GCB|GLUC	P33727	glucosidase, beta, acid	NM_000157
148	GBE1	NM_000158	1.12803	0.168074	4.15835	4.33215	4.12211	4.2224	4.12833	4.49778	4.29715	4.18385	16.4694	17.5789	16.5048	21.5617	18.5638	17.303	2632	chr3	81538850	81810950	3099	-	protein_coding	GBE	P31809	glucan (1,4-alpha-), branching enzyme 1	NM_000158
149	GCDH	NM_000159	0.835622	0.0686273	3.12172	2.86265	3.01613	3.05979	3.27566	2.95881	2.75323	2.86857	7.11364	7.30258	8.6922	6.76446	5.71	6.35212	2639	chr19	13001943	13010813	2483	+	protein_coding	ACAD5|GCD	P30748	glutaryl-CoA dehydrogenase	NM_000159
150	GCGR	NM_000160	0.988262	0.569983	0.0375544	0.02052	0	0.0536067	0.058332	1.09084e-05	0.0606942	0	0	0.0375169	0.0413314	0	0.0425811	0	2642	chr17	79762008	79771889	2053	+	protein_coding	.	P16370	glucagon receptor	NM_000160
151	GCH1	NM_000161	1.18798	0.0745776	3.57889	3.8274	3.39175	3.64868	3.67932	3.94097	3.78087	3.75316	9.53025	11.4838	11.8226	14.338	12.6804	12.5752	2643	chr14	55308724	55369542	2067	-	protein_coding	DYT14|DYT5|DYT5a|GCH|GTP-CH-1|GTPCH1|HPABH4B	P29664	GTP cyclohydrolase 1	NM_000161
152	GCK	NM_000162	1	1	0	0	0	0	0	0	0	0	0	0	0	0	0	0	2645	chr7	44183870	44229022	3073	-	protein_coding	FGQTL3|GK|GLK|HHF3|HK4|HKIV|HXKP|LGLK|MODY2	P25611	glucokinase	NM_000162
153	GHR	NM_000163	1	1	0	0	0	0	0	0	0	0	0	0	0	0	0	0	2690	chr5	42423877	42721980	6224	+	protein_coding	GHBP	P19922	growth hormone receptor	NM_000163
154	GIPR	NM_000164	1.35956	0.397645	0.403345	0.846483	0.483867	0.00125573	0.649253	0.000569569	1.4002	0.811102	0.400287	0.000193676	0.568981	0.000189673	1.63336	0.760104	2696	chr19	46171502	46186982	3289	+	protein_coding	MGC126722|PGQTL2	P25491	gastric inhibitory polypeptide receptor	NM_000164
155	GJA1	NM_000165	1.11035	0.0722943	0.0630015	0.214019	0.0558768	0.130166	0	0.240372	0.279645	0.1171	0.0398012	0.0936673	0	0.180962	0.212624	0.0856049	2697	chr6	121756723	121770890	3169	+	protein_coding	CX43|DFNB38|GJAL|HSS|ODDD	P32937	gap junction protein alpha 1	NM_000165
156	GJB1	NM_000166	1	1	0	0	0	0	0	0	0	0	0	0	0	0	0	0	2705	chrX	70435062	70445065	1733	+	protein_coding	CMTX|CMTX1|CX32	P1543	gap junction protein beta 1	NM_000166
157	GK	NM_000167	0.95485	0.676756	1.18989	1.12323	1.44504	1.0408	1.04542	1.20341	1.09164	1.07111	1.72796	1.05138	1.06514	1.3008	1.12467	1.11018	2710	chrX	30671476	30749577	4577	+	protein_coding	GK1|GKD	P5032	glycerol kinase	NM_000167
158	GLI3	NM_000168	1.21757	0.00506775	1.8184	2.1024	1.71332	1.83724	1.89851	2.12872	2.08624	2.09187	2.28786	2.55946	2.73106	3.36841	3.22999	3.28648	2737	chr7	42000548	42276618	8214	-	protein_coding	ACLS|GCPS|PAP-A|PAPA|PAPA1|PAPB|PHS|PPDIV	P23077	GLI family zinc finger 3	NM_000168
159	GLA	NM_000169	0.827051	0.0225758	5.76504	5.49109	5.87971	5.75311	5.65337	5.43844	5.51514	5.51829	58.0681	52.6754	49.3782	42.2996	44.4985	45.1663	2717	chrX	100652779	100663001	1418	-	protein_coding	GALA	P22756	galactosidase alpha	NM_000169
160	GLDC	NM_000170	1.00445	0.946616	0.194678	0.201077	0.25762	0.232093	0.088633	0.320106	0.206872	0.0649708	0.196336	0.173382	0.0634912	0.247993	0.153058	0.0469019	2731	chr9	6532464	6645692	3809	-	protein_coding	GCE|GCSP|HYGN1|MGC138198|MGC138200	P13967	glycine decarboxylase	NM_000170
161	GLRA1	NM_000171	1.00003	0.37751	2.24004e-05	6.05238e-05	6.71486e-05	5.1726e-08	0	1.568e-08	7.71244e-05	0.000104429	4.73348e-05	0	0	0	5.20802e-05	7.49554e-05	2741	chr5	151202074	151304397	1797	-	protein_coding	MGC138878|MGC138879|STHE	P11192	glycine receptor alpha 1	NM_000171
162	GNAT1	NM_000172	0.980741	0.600939	0.0657267	0.0376706	0.108295	0.0866243	0	0.110116	7.29926e-05	0	0.0783422	0.0613857	3.06315e-06	0.0791379	3.55394e-06	3.30062e-06	2779	chr3	50229043	50235129	4894	+	protein_coding	CSNBAD3|GBT1|GNATR	P27195	G protein subunit alpha transducin 1	NM_000172
163	GP1BA	NM_000173	0.938354	0.480641	0.77713	0.685334	0.730723	0.758821	0.839619	0.430833	0.80851	0.786437	0.661949	0.688336	0.790366	0.347203	0.747288	0.730567	2811	chr17	4835570	4838325	2523	+	protein_coding	BSS|CD42B|CD42b-alpha|GP1B|MGC34595	P35593	glycoprotein Ib platelet alpha subunit	NM_000173
164	GP9	NM_000174	1	1	0	0	0	0	0	0	0	0	0	0	0	0	0	0	2815	chr3	128779610	128781254	894	+	protein_coding	CD42a|GPIX	P5731	glycoprotein IX platelet	NM_000174
165	GPI	NM_000175	1.26059	0.00524909	6.81949	7.1536	6.89314	6.85502	6.70342	7.18608	7.17962	7.09324	118.256	114.192	103.316	144.407	143.236	136.538	2821	chr19	34855645	34893318	4603	+	protein_coding	AMF|DKFZp686C13233|GNPI|NLK|PGI|PHI|SA-36|SA36	P30766	glucose-6-phosphate isomerase	NM_000175
166	GSN	NM_000177	0.946646	0.753166	1.55945	1.48034	1.82938	1.52066	1.2745	1.24732	1.35266	1.78351	2.56158	1.85958	1.42078	1.37151	1.54471	2.45929	2934	chr9	124030380	124095120	3545	+	protein_coding	DKFZp313L0718	P18825	gelsolin	NM_000177
167	GSS	NM_000178	0.893717	0.150991	5.23664	5.07453	5.33089	5.29336	5.0724	5.06665	5.14691	5.0066	39.3772	38.0302	32.6786	32.4636	34.2523	31.3809	2937	chr20	33516236	33543601	1900	-	protein_coding	GSHS|MGC14098	P35586	glutathione synthetase	NM_000178
168	MSH6	NM_000179	0.958512	0.178535	5.32818	5.26705	5.37651	5.31428	5.29243	5.29159	5.21058	5.29735	40.676	38.5973	38.2272	38.1105	35.8411	38.6064	2956	chr2	48010221	48034092	6997	+	protein_coding	GTBP|HNPCC5|HSAP	P25500	mutS homolog 6	NM_000179
169	GUCY2D	NM_000180	1	1	0	0	0	0	0	0	0	0	0	0	0	0	0	0	3000	chr17	7905988	7923658	3623	+	protein_coding	CORD5|CORD6|CYGD|GUC1A4|GUC2D|LCA|LCA1|RCD2|RETGC-1|ROS-GC1|ROSGC|retGC	P34698	guanylate cyclase 2D, retinal	NM_000180
170	GUSB	NM_000181	0.89783	0.117317	5.35384	5.19835	5.41854	5.27981	5.3598	5.09836	5.32695	5.15994	41.9072	37.6623	40.1021	33.2068	38.9387	35.0114	2990	chr7	65425672	65447301	2755	-	protein_coding	BG|FLJ39445|MPS7	.	glucuronidase beta	NM_000181
171	HADHA	NM_000182	0.946256	0.295029	6.19696	6.11726	6.2743	6.22796	6.0817	6.1745	6.10845	6.06679	76.6542	73.5922	66.7934	71.1222	67.6448	66.5218	3030	chr2	26413504	26467594	3037	-	protein_coding	ECHA|GBP|HADH|LCEH|LCHAD|MGC1728|MTPA|TP-ALPHA	P35682	hydroxyacyl-CoA dehydrogenase/3-ketoacyl-CoA thiolase/enoyl-CoA hydratase (trifunctional protein), alpha subunit	NM_000182
172	HADHB	NM_000183	0.960873	0.396786	5.17909	5.12151	5.22325	5.11814	5.19385	5.14393	5.19761	5.01708	36.4755	33.5634	35.6361	34.3056	35.5143	31.6164	3032	chr2	26467616	26513333	2271	+	protein_coding	ECHB|MGC87480|MTPB|TP-BETA	P30577	hydroxyacyl-CoA dehydrogenase/3-ketoacyl-CoA thiolase/enoyl-CoA hydratase (trifunctional protein), beta subunit	NM_000183
173	HBG2	NM_000184	1	1	0	0	0	0	0	0	0	0	0	0	0	0	0	0	3048	chr11	5274421	5276011	583	-	protein_coding	FLJ76540	P2853	hemoglobin subunit gamma 2	NM_000184
174	SERPIND1	NM_000185	0.923032	0.426405	0.342852	0.227304	0.120685	0.500643	0.381492	0.341063	0.109653	0.221911	0.0878511	0.412786	0.303025	0.266202	0.0780846	0.168131	3053	chr22	21128383	21142008	2221	+	protein_coding	D22S673|HC2|HCF2|HCII|HLS2|LS2	P32527	serpin family D member 1	NM_000185
175	CFH	NM_000186	1	1	0	0	0	0	0	0	0	0	0	0	0	0	0	0	3075	chr1	196621008	196716634	4375	+	protein_coding	AHUS1|ARMD4|ARMS1|CFHL3|FH|FHL1|HF|HF1|HF2|HUS|MGC88246	P29702	complement factor H	NM_000186
176	HGD	NM_000187	0.954724	0.0716679	0.0878624	0.0210183	0.09097	0.0548874	0.117055	2.08285e-05	0.062138	0	0.0654342	0.038408	0.0846379	0	0.0435925	0	3081	chr3	120347015	120401418	2010	-	protein_coding	AKU|FLJ94126|HGO	P28839	homogentisate 1,2-dioxygenase	NM_000187
177	HK1	NM_000188	1.11877	0.0235076	6.19845	6.36036	6.27643	6.20122	6.11308	6.37738	6.35464	6.3489	76.7709	72.2188	68.2845	82.0124	80.42	81.0992	3098	chr10	71029756	71161637	4234	+	protein_coding	HK1-ta|HK1-tb|HK1-tc|HKI|HXK1	P27250	hexokinase 1	NM_000188
178	HK2	NM_000189	1.43527	0.00465568	3.52808	4.0494	3.60999	3.46471	3.50561	4.18348	3.98369	3.97104	11.2493	9.98617	10.3686	17.1461	14.7462	14.7868	3099	chr2	75059782	75120481	7093	+	protein_coding	DKFZp686M1669|HKII|HXK2	P26602	hexokinase 2	NM_000189
179	HMBS	NM_000190	0.858336	0.184458	4.8994	4.67902	5.11806	4.76788	4.78456	4.57662	4.77163	4.68221	33.8361	26.1139	26.5867	22.8261	26.1788	24.8586	3145	chr11	118955587	118964259	1601	+	protein_coding	PBG-D|PBGD|PORC|UPS	P487	hydroxymethylbilane synthase	NM_000190
180	HMGCL	NM_000191	0.9069	0.146268	3.99213	3.85115	4.08841	3.86189	4.01689	3.91508	3.85415	3.78109	16.0629	13.4713	15.2028	14.0642	13.3908	12.8447	3155	chr1	24128367	24151949	1608	-	protein_coding	HL	P31320	3-hydroxymethyl-3-methylglutaryl-CoA lyase	NM_000191
181	TBX5	NM_000192	1	0.785489	2.92605e-06	3.73809e-06	6.93402e-06	1.84413e-06	0	5.63109e-06	4.35403e-09	5.57881e-06	4.90545e-06	1.23295e-06	0	3.86619e-06	0	4.04722e-06	6910	chr12	114791735	114846247	4362	-	protein_coding	HOS	P35831	T-box 5	NM_000192
182	SHH	NM_000193	0.918219	0.434196	2.00812	1.88503	2.00287	1.99838	2.02299	1.56675	2.07967	1.96026	3.01803	2.9806	3.06719	1.95877	3.21088	2.91309	6469	chr7	155595558	155604967	1576	-	protein_coding	HHG1|HLP3|HPE3|MCOPCB5|SMMCI|TPT|TPTPS	P193	sonic hedgehog	NM_000193
183	HPRT1	NM_000194	1.06504	0.14388	5.97336	6.06426	5.95736	5.93949	6.02193	6.02809	6.14636	6.01467	61.3408	60.0711	64.0417	64.1622	69.4773	64.1224	3251	chrX	133594175	133634698	1415	+	protein_coding	HGPRT|HPRT	P7911	hypoxanthine phosphoribosyltransferase 1	NM_000194
184	HPS1	NM_000195	0.973056	0.452271	2.79849	2.75908	2.7228	2.83062	2.83916	2.72932	2.72945	2.8167	5.62074	6.08371	6.16191	5.62277	5.60217	6.09	3257	chr10	100175955	100206704	4212	-	protein_coding	HPS|MGC5277	P2056	HPS1, biogenesis of lysosomal organelles complex 3 subunit 1	NM_000195
185	HSD11B2	NM_000196	1.07926	0.657268	0.937579	1.04762	0.881309	1.31877	0.495043	1.01104	1.09205	1.03859	0.845336	1.48789	0.410033	1.01373	1.12581	1.0624	3291	chr16	67465036	67471454	1882	+	protein_coding	AME|AME1|HSD11K|HSD2|SDR9C3	P6138	hydroxysteroid (11-beta) dehydrogenase 2	NM_000196
186	HSD17B3	NM_000197	1.03241	0.643511	0.0390856	0.0850992	0	7.87769e-05	0.114144	2.38804e-05	8.22851e-05	0.241484	0	0	0.0824515	0	0	0.183705	3293	chr9	98997589	99064434	1134	-	protein_coding	EDH17B3|SDR12C2	P28853	hydroxysteroid (17-beta) dehydrogenase 3	NM_000197
187	HSD3B2	NM_000198	1.00205	0.933034	0.0220558	0.0250141	0	0.0651808	0	8.79269e-06	0.0737693	0	0	0.0458328	0	0	0.0520262	0	3284	chr1	119957554	119965662	1870	+	protein_coding	HSD3B|HSDB|SDR11E2	P18730	hydroxy-delta-5-steroid dehydrogenase, 3 beta- and steroid delta-isomerase 2	NM_000198
188	SGSH	NM_000199	1.11183	0.0208414	3.25043	3.40336	3.29089	3.24226	3.21717	3.33398	3.43164	3.44202	8.81695	8.41966	8.3079	9.07022	9.74063	9.93911	6448	chr17	78183079	78194199	2768	-	protein_coding	HSS|MPS3A|SFMD	P1953	N-sulfoglucosamine sulfohydrolase	NM_000199
189	HTN3	NM_000200	1	1	0	0	0	0	0	0	0	0	0	0	0	0	0	0	3347	chr4	70894130	70902255	578	+	protein_coding	HIS2|HTN2|HTN5	P2675	histatin 3	NM_000200
190	ICAM1	NM_000201	1.72072	0.00264467	0.981246	1.76426	0.825268	1.10326	1.00162	1.77133	1.88992	1.61878	0.775833	1.14125	1.00355	2.41045	2.69425	2.08572	3383	chr19	10381517	10397291	3246	+	protein_coding	BB2|CD54|P3.58	P10540	intercellular adhesion molecule 1	NM_000201
191	IDS	NM_000202	1.29678	0.00151001	4.29967	4.6746	4.20595	4.39152	4.29556	4.67816	4.69116	4.65425	17.5166	19.8876	18.6564	24.5657	24.7091	24.3544	3423	chrX	148560295	148586884	6121	-	protein_coding	MPS2|SIDS	P21130	iduronate 2-sulfatase	NM_000202
192	IDUA	NM_000203	1.27423	0.171379	2.46506	2.81468	2.11485	2.51326	2.70574	2.85403	3.00824	2.54371	3.34512	4.68438	5.52922	6.2213	7.0128	4.86824	3425	chr4	980785	998345	2214	+	protein_coding	IDA|MPS1	P12097	iduronidase, alpha-L-	NM_000203
193	CFI	NM_000204	1	1	0	0	0	0	0	0	0	0	0	0	0	0	0	0	3426	chr4	110661848	110723335	2161	-	protein_coding	AHUS3|C3BINA|C3b-INA|FI|IF|KAF	P10673	complement factor I	NM_000204
194	IL2RG	NM_000206	0.981211	0.373888	0.0273728	7.66362e-06	0	1.70597e-05	0.0805917	5.17141e-06	1.78194e-05	0	0	0	0.0575365	0	0	0	3561	chrX	70327254	70331481	1534	-	protein_coding	CD132|IL-2RG|IMD4|P64|SCIDX|SCIDX1	P34504	interleukin 2 receptor subunit gamma	NM_000206
195	INS	NM_000207	1.19252	0.535442	0.120693	0.37471	0	0.335449	0	0.000102137	0.918131	0	0	0.26023	0	0	0.886417	0	3630	chr11	2181009	2182439	635	-	protein_coding	IDDM2|ILPR|IRDN|MODY10	P10803	insulin	NM_000207
196	INSR	NM_000208	1.63551	0.0816345	1.513	2.22275	1.8938	1.12213	1.41645	2.37838	2.43513	1.76375	2.72551	1.16767	1.67137	4.19409	4.38888	2.41513	3643	chr19	7112266	7294011	9059	-	protein_coding	CD220|HHF5	P20366	insulin receptor	NM_000208
197	PDX1	NM_000209	1	1	0	0	0	0	0	0	0	0	0	0	0	0	0	0	3651	chr13	28494168	28500451	2573	+	protein_coding	GSF|IDX-1|IPF1|IUF1|MODY4|PDX-1|STF-1	P15234	pancreatic and duodenal homeobox 1	NM_000209
198	ITGA6	NM_000210	1.24728	0.247221	2.62213	2.94091	2.47624	2.52019	2.84172	2.84269	2.644	3.26495	4.58155	4.71069	6.17468	6.16435	5.22188	8.66866	3655	chr2	173292314	173371181	5810	+	protein_coding	CD49f|DKFZp686J01244|FLJ18737|ITGA6B|VLA-6	P9060	integrin subunit alpha 6	NM_000210
199	ITGB2	NM_000211	1.31292	0.424194	1.3219	1.71468	0	1.64228	1.75628	1.46484	1.53579	2.06588	0	2.11121	2.38042	1.75749	1.88926	3.20639	3689	chr21	46305869	46348788	3089	-	protein_coding	CD18|LAD|LCAMB|LFA-1|MAC-1|MF17|MFI7	P34766	integrin subunit beta 2	NM_000211
200	ITGB3	NM_000212	1.03667	0.0422862	0.0155434	0.0675064	0	5.21766e-05	0.0460862	0.0803992	0.071601	0.0503538	0	0	0.0325222	0.0571702	0.0504355	0.0360215	3690	chr17	45331208	45390077	4894	+	protein_coding	CD61|GP3A|GPIIIa	P9743	integrin subunit beta 3	NM_000212
201	ITGB4	NM_000213	0.942154	0.586488	1.94894	1.86298	2.01757	1.97809	1.8456	2.00843	1.55285	1.9838	3.059	2.92521	2.59666	3.01896	1.92191	2.97703	3691	chr17	73717516	73753899	6165	+	protein_coding	CD104	P11322	integrin subunit beta 4	NM_000213
202	JAG1	NM_000214	1.18087	0.0602981	1.44028	1.68012	1.45236	1.42187	1.44642	1.56827	1.83834	1.61926	1.74292	1.67005	1.72715	1.96243	2.56372	2.08767	182	chr20	10618332	10654694	5987	-	protein_coding	AGS|AHD|AWS|CD339|HJ1|JAGL1|MGC104644	P18238	jagged 1	NM_000214
203	JAK3	NM_000215	1.20426	0.00994871	0.574204	0.842354	0.621832	0.617883	0.478318	0.891916	0.862704	0.769635	0.541035	0.531362	0.393663	0.854372	0.814184	0.710448	3718	chr19	17935593	17958841	5434	-	protein_coding	JAK-3|JAK3_HUMAN|JAKL|L-JAK|LJAK	P34260	Janus kinase 3	NM_000215
204	ANOS1	NM_000216	1.01969	0.59608	0.16643	0.194566	0.157244	0.156543	0.185315	0.286599	0.142926	0.149566	0.115757	0.113722	0.137258	0.219369	0.10326	0.110529	3730	chrX	8496915	8700227	6314	-	protein_coding	.	P24272	anosmin 1	NM_000216
205	KCNA1	NM_000217	1	1	0	0	0	0	0	0	0	0	0	0	0	0	0	0	3736	chr12	5019073	5027422	7983	+	protein_coding	AEMK|EA1|HBK1|HUK1|KV1.1|MBK1|MGC126782|MGC138385|MK1|RBK1	P16843	potassium voltage-gated channel subfamily A member 1	NM_000217
206	KCNQ1	NM_000218	0.958394	0.596084	0.235624	0.174315	0.277946	0.0964971	0.322628	0.234784	0.273285	0	0.213346	0.0684738	0.250886	0.176374	0.207209	0	3784	chr11	2466221	2870340	3507	+	protein_coding	ATFB1|ATFB3|FLJ26167|JLNS1|KCNA8|KCNA9|KVLQT1|Kv1.9|Kv7.1|LQT|LQT1|RWS|SQT2|WRS	P21661	potassium voltage-gated channel subfamily Q member 1	NM_000218
207	KCNE1	NM_000219	1	1	0	0	0	0	0	0	0	0	0	0	0	0	0	0	3753	chr21	35818986	35884573	4084	-	protein_coding	FLJ18426|FLJ38123|FLJ94103|ISK|JLNS|JLNS2|LQT2/5|LQT5|MGC33114|MinK	P381	potassium voltage-gated channel subfamily E regulatory subunit 1	NM_000219
208	KCNJ1	NM_000220	1	1	0	0	0	0	0	0	0	0	0	0	0	0	0	0	3758	chr11	128707909	128737268	2908	-	protein_coding	KIR1.1|ROMK|ROMK1	P20939	potassium voltage-gated channel subfamily J member 1	NM_000220
209	KHK	NM_000221	0.939471	0.456822	2.37346	2.28338	2.29645	2.51066	2.30283	2.43758	2.22938	2.16924	3.9259	4.6766	3.93814	4.41084	3.66922	3.52573	3795	chr2	27309611	27323619	2550	+	protein_coding	.	P21546	ketohexokinase	NM_000221
210	KIT	NM_000222	0.989959	0.359813	0.0437235	0.029164	0.0435728	0.0425712	0.0450254	0.0383639	0.0475858	0.00112402	0.030866	0.0296515	0.0317614	0.0268648	0.0332002	0.000847586	3815	chr4	55524095	55606881	5164	+	protein_coding	C-Kit|CD117|PBT|SCFR	P25312	KIT proto-oncogene receptor tyrosine kinase	NM_000222
211	KRT12	NM_000223	1.07788	0.268267	0.0975393	0.20573	0.178319	0.108727	0	0.070701	0.288616	0.248675	0.132191	0.0775874	0	0.0500636	0.220151	0.189821	3859	chr17	39017430	39023462	1992	-	protein_coding	K12	P28828	keratin 12	NM_000223
212	KRT18	NM_000224	0.954688	0.439493	12.3986	12.3317	12.5271	12.3854	12.2719	12.2984	12.3326	12.3633	5920.99	5322.93	4949.17	5028.66	5130.42	5306.67	3875	chr12	53342655	53346685	1953	+	protein_coding	CYK18|K18	P34888	keratin 18	NM_000224
213	KRT9	NM_000226	0.988936	0.374019	0.0160552	4.43358e-06	0	0.0476393	0	2.99178e-06	1.03089e-05	0	0	0.0332794	0	0	0	0	3857	chr17	39722094	39728310	2289	-	protein_coding	CK-9|EPPK|K9	P1836	keratin 9	NM_000226
214	LAMA3	NM_000227	0.780733	0.198895	0.667583	0.310484	0.822219	0.39981	0.746546	0.672021	0.000754822	0.171905	0.77043	0.317196	0.678394	0.592402	0	0.128583	3909	chr18	21269407	21535029	10987	+	protein_coding	BM600|E170|LAMNA|LOCS|lama3a	P10491	laminin subunit alpha 3	NM_000227
215	LAMB3	NM_000228	1.14009	0.259666	2.57915	2.7683	2.72491	2.69331	2.27754	2.76513	2.65725	2.87437	5.62986	5.44074	3.85282	5.78952	5.28035	6.37725	3914	chr1	209788218	209825820	4142	-	protein_coding	BM600-125KDA|FLJ99565|LAM5|LAMNB1	P18280	laminin subunit beta 3	NM_000228
216	LCAT	NM_000229	0.99544	0.978281	0.799665	0.793072	0.943834	0.585139	0.846613	1.1374	0.69523	0.463932	0.926717	0.496857	0.799099	1.19824	0.615271	0.383631	3931	chr16	67973787	67978015	1354	-	protein_coding	.	P26668	lecithin-cholesterol acyltransferase	NM_000229
217	LEP	NM_000230	0.963284	0.360563	0.0658149	0.0118479	0	0.0310946	0.161231	1.47617e-05	0.0352414	0	0	0.0215449	0.118385	0	0.0244534	0	3952	chr7	127881331	127897682	3427	+	protein_coding	FLJ94114|OB|OBS	P25766	leptin	NM_000230
218	SGCG	NM_000231	0.858451	0.07154	2.45139	2.23119	2.35122	2.46278	2.53428	2.07561	2.33169	2.27396	4.11646	4.49098	4.7973	3.20979	4.01265	3.86601	6445	chr13	23755060	23899304	1655	+	protein_coding	A4|DAGA4|DMDA|DMDA1|LGMD2C|MAM|MGC130048|SCARMD2|SCG3|TYPE	P2842	sarcoglycan gamma	NM_000231
219	SGCB	NM_000232	1.04548	0.404948	2.88349	2.94766	2.78318	2.92184	2.9404	3.00142	2.98951	2.84698	5.9043	6.54534	6.68268	6.99755	6.90663	6.24201	6443	chr4	52886861	52904485	4279	-	protein_coding	A3b|LGMD2E|SGC	P6875	sarcoglycan, beta (43kDa dystrophin-associated glycoprotein)	NM_000232
220	LHCGR	NM_000233	0.984112	0.374019	0.0231125	6.40242e-06	0	0.0682554	0	4.32035e-06	1.48869e-05	0	0	0.0480638	0	0	0	0	3973	chr2	48913913	48982880	3093	-	protein_coding	FLJ41504|HHG|LCGR|LGR2|LH/CG-R|LH/CGR|LHR|LHRHR|LSH-R|ULG5	P744	luteinizing hormone/choriogonadotropin receptor	NM_000233
221	LIG1	NM_000234	0.878728	0.0201175	5.16173	4.97522	5.22315	5.14775	5.11206	5.00489	5.01961	4.89813	36.4716	34.2823	33.6168	31.0616	31.2746	29.0359	3978	chr19	48618702	48673860	4537	-	protein_coding	MGC117397|MGC130025	P5753	DNA ligase 1	NM_000234
222	LIPA	NM_000235	1.0312	0.619436	4.10896	4.15328	4.05721	4.12811	4.14016	4.29436	4.03644	4.11685	15.7003	16.4041	16.6485	18.5944	15.328	16.4709	3988	chr10	90973326	91011796	2965	-	protein_coding	CESD|LAL	P5405	lipase A, lysosomal acid type	NM_000235
223	LIPC	NM_000236	1	1	0	0	0	0	0	0	0	0	0	0	0	0	0	0	3990	chr15	58724175	58861073	1604	+	protein_coding	HDLCQ12|HL|HTGL|LIPH	P31013	lipase C, hepatic type	NM_000236
224	LPL	NM_000237	0.99452	0.373887	0.00793058	2.21823e-06	0.0236573	4.93791e-06	0	1.49686e-06	5.15782e-06	0	0.0166482	0	0	0	0	0	4023	chr8	19796582	19824770	3747	+	protein_coding	HDLCQ11|LIPD	P21117	lipoprotein lipase	NM_000237
225	KCNH2	NM_000238	1.10891	0.352912	1.13283	1.28196	1.1072	1.07966	1.2084	1.26314	1.49894	1.04863	1.15862	1.10722	1.31216	1.39801	1.81773	1.07779	3757	chr7	150642044	150675402	5717	-	protein_coding	ERG1|HERG|HERG1|Kv11.1|LQT2|SQT1	P35853	potassium voltage-gated channel, subfamily H (eag-related), member 2	NM_000238
226	LYZ	NM_000239	1.13611	0.369058	0.300239	0.484347	0.238062	0.14635	0.493516	0.424448	0.733362	0.253736	0.180385	0.105642	0.408308	0.341443	0.659455	0.19453	4069	chr12	69742134	69748013	1516	+	protein_coding	LZM	P8909	lysozyme	NM_000239
227	MAOA	NM_000240	1.1481	0.123778	1.91892	2.11818	1.72142	2.09845	1.91232	2.12026	2.14303	2.09076	2.30653	3.26635	2.76699	3.34278	3.39964	3.28368	4128	chrX	43514155	43606071	5438	+	protein_coding	.	P10090	monoamine oxidase A	NM_000240
228	MBL2	NM_000242	1	1	0	0	0	0	0	0	0	0	0	0	0	0	0	0	4153	chr10	54525140	54531460	3569	-	protein_coding	COLEC1|HSMBPC|MBL|MBP|MBP1|MGC116832|MGC116833	P23578	mannose binding lectin 2	NM_000242
229	MEFV	NM_000243	1.0898	0.0104216	0.0170357	0.141099	0.0504025	0.000116858	0	0.148959	0.100793	0.17262	0.0358069	1.00858e-05	1.01523e-05	0.108542	0.0717564	0.12833	4210	chr16	3292028	3306627	3499	-	protein_coding	FMF|MEF|MGC126560|MGC126586|TRIM20	P30642	Mediterranean fever	NM_000243
230	MEN1	NM_000244	1	1	0	0	0	0	0	0	0	0	0	0	0	0	0	0	4221	chr11	64570986	64578766	4161	-	protein_coding	MEAI|SCG2	P22051	menin 1	NM_000244
231	MET	NM_000245	0.991588	0.900631	3.1632	3.15102	3.00006	3.16184	3.31098	3.18602	3.1407	3.12564	7.02496	7.91018	8.93272	8.08885	7.77863	7.78582	4233	chr7	116312459	116438440	6776	+	protein_coding	AUTS9|HGFR|RCCP2|c-Met	P3251	MET proto-oncogene, receptor tyrosine kinase	NM_000245
232	CIITA	NM_000246	1.02838	0.00456586	8.40411e-06	0.0403856	0	2.52122e-05	0	0.0432198	0.0506924	0.0271442	0	0	0	0.0303247	0.0354295	0.0192976	4261	chr16	10971055	11018840	4940	+	protein_coding	C2TA|CIITAIV|MHC2TA|NLRA	P12911	class II, major histocompatibility complex, transactivator	NM_000246
233	MICA	NM_000247	1	1	0	0	0	0	0	0	0	0	0	0	0	0	0	0	100507436	chr6	31367561	31383092	2490	+	protein_coding	FLJ60820|MGC111087|PERB11.1	P33051	MHC class I polypeptide-related sequence A	NM_000247
234	MICA	NM_000247_1	1	1	0	0	0	0	0	0	0	0	0	0	0	0	0	0	100507436	chr6	31367561	31383092	2490	+	protein_coding	FLJ60820|MGC111087|PERB11.1	P33051	MHC class I polypeptide-related sequence A	NM_000247_1
235	MICA	NM_000247_2	0.995918	0.905192	4.78609	4.78019	4.84013	4.70371	4.81089	4.81893	4.74312	4.77753	27.7348	24.9336	27.0947	27.1849	25.6467	26.6221	100507436	chr6	31367561	31383092	2490	+	protein_coding	FLJ60820|MGC111087|PERB11.1	P33051	MHC class I polypeptide-related sequence A	NM_000247_2
236	MICA	NM_000247_4	1	1	0	0	0	0	0	0	0	0	0	0	0	0	0	0	100507436	chr6	31367561	31383092	2490	+	protein_coding	FLJ60820|MGC111087|PERB11.1	P33051	MHC class I polypeptide-related sequence A	NM_000247_4
237	MITF	NM_000248	0.908767	0.531947	0.298331	0.160313	0.420871	0.000307412	0.433188	9.31924e-05	0.000321101	0.435417	0.339912	0	0.350561	0	0	0.354961	4286	chr3	69788586	70017488	5984	+	protein_coding	MI|WS2A|bHLHe32	P11128	microphthalmia-associated transcription factor	NM_000248
238	MLH1	NM_000249	0.911181	0.148412	4.77403	4.63984	4.66216	4.85014	4.80321	4.57777	4.60171	4.73501	24.4009	27.7081	26.9453	22.8455	23.1579	25.8186	4292	chr3	37034841	37092337	3002	+	protein_coding	COCA2|FCC2|HNPCC|HNPCC2|MGC5172|hMLH1	P29984	mutL homolog 1	NM_000249
239	MPO	NM_000250	1	1	0	0	0	0	0	0	0	0	0	0	0	0	0	0	4353	chr17	56347217	56358296	3215	-	protein_coding	.	P21331	myeloperoxidase	NM_000250
240	MSH2	NM_000251	0.991304	0.860917	4.80426	4.79166	4.71282	4.78225	4.91068	4.79664	4.73035	4.84566	25.3093	26.3855	29.1064	26.7527	25.4114	27.9564	4436	chr2	47630206	47710367	3025	+	protein_coding	COCA1|FCC1|HNPCC|HNPCC1|LCFS2	P18814	mutS homolog 2	NM_000251
241	MTM1	NM_000252	1.07515	0.484794	2.58114	2.68568	2.41866	2.63319	2.67846	2.74576	2.45614	2.82918	4.36255	5.17788	5.40691	5.69905	4.46253	6.14953	4534	chrX	149737047	149841616	3436	+	protein_coding	CNM|MTMX|XLMTM	P32278	myotubularin 1	NM_000252
242	MTTP	NM_000253	1	1	0	0	0	0	0	0	0	0	0	0	0	0	0	0	4547	chr4	100485235	100545154	4095	+	protein_coding	ABL|MGC149819|MGC149820|MTP	P1691	microsomal triglyceride transfer protein	NM_000253
243	MTR	NM_000254	1.09314	0.236257	3.41242	3.5409	3.25942	3.48444	3.48202	3.65129	3.49999	3.46452	8.60643	10.1418	10.1834	11.5479	10.2604	10.1135	4548	chr1	236958581	237067281	10558	+	protein_coding	FLJ33168|FLJ43216|FLJ45386|MS|cblG	P32084	5-methyltetrahydrofolate-homocysteine methyltransferase	NM_000254
244	MUT	NM_000255	0.94817	0.184731	3.46242	3.38564	3.4587	3.39459	3.53075	3.33206	3.40577	3.41759	10.0276	9.46887	10.5674	9.05647	9.5483	9.75748	4594	chr6	49398073	49431041	3886	-	protein_coding	MCM	P16870	methylmalonyl-CoA mutase	NM_000255
245	MYBPC3	NM_000256	0.994208	0.374019	0.00838273	2.30558e-06	0	0.0250035	0	1.55581e-06	5.36094e-06	0	0	0.0173039	0	0	0	0	4607	chr11	47352957	47374253	4217	-	protein_coding	CMH4|DKFZp779E1762|FHC|MYBP-C	P18510	myosin binding protein C, cardiac	NM_000256
246	MYH7	NM_000257	0.993373	0.373887	0.00959498	2.68445e-06	0.0285897	5.97576e-06	0	1.81147e-06	6.24188e-06	0	0.0201479	0	0	0	0	0	4625	chr14	23881947	23904895	6055	-	protein_coding	CMD1S|CMH1|DKFZp451F047|MGC138376|MGC138378|MPD1|MYHCB|SPMD|SPMM	P8219	myosin, heavy chain 7, cardiac muscle, beta	NM_000257
247	MYL3	NM_000258	1	1	0	0	0	0	0	0	0	0	0	0	0	0	0	0	4634	chr3	46899357	46904973	929	-	protein_coding	CMH8|MLC1SB|MLC1V|VLC1	P33332	myosin light chain 3	NM_000258
248	MYO5A	NM_000259	1.11798	0.310512	2.36808	2.52897	2.19892	2.54274	2.34179	2.33266	2.66081	2.57376	3.6047	4.80345	4.07347	4.03092	5.29785	4.98917	4644	chr15	52599480	52821247	12225	-	protein_coding	GS1|MYH12|MYO5|MYR12	P12603	myosin VA	NM_000259
249	MYO7A	NM_000260	1.02796	0.612108	0.0500938	0.0898771	0	0.145347	0	0.182741	0.0810669	0	2.09474e-05	0.105273	3.62416e-06	0.134783	0.0572841	8.1916e-06	4647	chr11	76839310	76926286	7849	+	protein_coding	DFNA11|DFNB2|MYOVIIA|MYU7A|NSRD2|USH1B	P14253	myosin VIIA	NM_000260
250	MYOC	NM_000261	1	1	0	0	0	0	0	0	0	0	0	0	0	0	0	0	4653	chr1	171604557	171621773	2045	-	protein_coding	GLC1A|GPOA|JOAG|JOAG1|TIGR|myocilin	P29573	myocilin	NM_000261
251	NAGA	NM_000262	1.07006	0.126486	3.07673	3.17442	3.13943	3.09268	2.99432	3.21135	3.11631	3.19385	7.83789	7.49288	6.9756	8.24995	7.63161	8.20992	4668	chr22	42454338	42466846	3726	-	protein_coding	D22S674|GALB	P4344	N-acetylgalactosaminidase, alpha-	NM_000262
252	NAGLU	NM_000263	0.861603	0.283874	3.34687	3.13196	3.56024	3.33118	3.11481	3.30674	2.91001	3.15174	10.8295	9.02024	7.67037	8.88209	6.47892	7.9473	4669	chr17	40687951	40696466	2782	+	protein_coding	MPS-IIIB|MPS3B|NAG|UFHSD	P17535	N-acetyl-alpha-glucosaminidase	NM_000263
253	PTCH1	NM_000264	1.04571	0.770046	0.354003	0.41849	0.483211	0.387193	0.174546	0.000163344	0.619191	0.559203	0.399327	0.30594	0.128847	0	0.533319	0.477042	5727	chr9	98205264	98279247	9432	-	protein_coding	BCNS|FLJ26746|FLJ42602|HPE7|NBCCS|PTC|PTC1|PTCH|PTCH11	P21757	patched 1	NM_000264
254	NCF1	NM_000265	0.988576	0.697231	0.0484905	0.0319147	0.0660997	0.078151	0	1.52819e-05	5.26575e-05	0.0936375	0.0471548	0.0552118	0	0	0	0.067819	653361	chr7	74188309	74203720	1459	+	protein_coding	FLJ79451|NCF1A|NOXO2|SH3PXD1A|p47phox	P12315	neutrophil cytosolic factor 1	NM_000265
255	NDP	NM_000266	1.01663	0.373851	4.92072e-06	0.0238062	0	1.47621e-05	0	0.0702567	1.54195e-05	0	0	0	0	0.0497844	0	0	4693	chrX	43808024	43832921	2002	-	protein_coding	EVR2|FEVR|ND	P8006	Norrie disease (pseudoglioma)	NM_000266
256	NF1	NM_000267	1.06189	0.587336	2.17963	2.26625	2.10847	1.94323	2.44177	2.27222	2.2284	2.29731	3.32412	2.82963	4.4371	3.82489	3.66674	3.94405	4763	chr17	29421945	29704695	12425	+	protein_coding	DKFZp686J1293|FLJ21220|NFNS|VRNF|WSS	P8749	neurofibromin 1	NM_000267
257	NF2	NM_000268	1.15592	0.408536	2.01567	2.22472	1.89241	1.7906	2.31003	2.41276	2.32543	1.88188	2.72271	2.4453	3.96259	4.31894	3.99248	2.70787	4771	chr22	29999545	30094589	6289	+	protein_coding	ACN|BANF|SCH	P1127	neurofibromin 2 (merlin)	NM_000268
258	NME1	NM_000269	0.808929	0.0551108	8.47225	8.16633	8.6534	8.39304	8.35138	8.0955	8.16129	8.23865	402.982	333.518	325.913	272.109	283.808	303.267	4830	chr17	49230920	49239450	686	+	protein_coding	AWD|GAAD|NB|NBS|NDPK-A|NDPKA|NM23|NM23-H1	P26838	NME/NM23 nucleoside diphosphate kinase 1	NM_000269
259	PNP	NM_000270	1.02824	0.592695	5.20354	5.24372	5.27014	5.16667	5.17143	5.2209	5.35229	5.15066	37.7142	34.745	35.0715	36.2402	39.6484	34.7791	4860	chr14	20937538	20946165	2421	+	protein_coding	FLJ94043|FLJ97288|FLJ97312|MGC117396|MGC125915|MGC125916|NP|PRO1837|PUNP	P28066	purine nucleoside phosphorylase	NM_000270
260	NPC1	NM_000271	1.0359	0.497431	3.63961	3.69049	3.71119	3.57349	3.63081	3.74493	3.74358	3.57654	12.1373	10.8496	11.3986	12.3888	12.3315	11.0128	4864	chr18	21111463	21166581	4814	-	protein_coding	FLJ98532|NPC	P159	NPC intracellular cholesterol transporter 1	NM_000271
261	NPHP1	NM_000272	0.986572	0.881808	0.09897	0.0794667	0	0.278594	1.94643e-05	0.226226	0.000160252	0	3.03096e-05	0.211868	2.88674e-05	0.169469	2.86253e-05	2.89981e-05	4867	chr2	110880914	110962639	2790	-	protein_coding	FLJ97602|JBTS4|NPH1|SLSN1	P13665	nephronophthisis 1 (juvenile)	NM_000272
262	GPR143	NM_000273	0.91863	0.284935	2.89054	2.7681	2.94037	2.72357	2.99373	2.65323	2.82719	2.81734	6.69784	5.57609	6.97175	5.28223	6.06503	6.09388	4935	chrX	9693453	9734005	1696	-	protein_coding	NYS6|OA1	P28148	G protein-coupled receptor 143	NM_000273
263	OAT	NM_000274	0.965564	0.295164	4.65711	4.60656	4.61376	4.64014	4.71549	4.65881	4.59796	4.56121	23.5624	23.8175	25.2968	24.2243	23.0966	22.7767	4942	chr10	126085872	126107545	2092	-	protein_coding	DKFZp781A11155|GACR|HOGA|OATASE|OKT	P16456	ornithine aminotransferase	NM_000274
264	OCA2	NM_000275	1	1	0	0	0	0	0	0	0	0	0	0	0	0	0	0	4948	chr15	28000021	28344458	3736	-	protein_coding	BEY|BEY1|BEY2|BOCA|D15S12|EYCL|EYCL2|EYCL3|HCL3|P|PED|SHEP1	P18125	OCA2 melanosomal transmembrane protein	NM_000275
265	OCRL	NM_000276	1.22078	0.63872	1.10365	1.39146	0.691347	1.39468	1.13938	0.000699629	1.49057	2.02142	0.618052	1.62137	1.20418	0	1.80124	3.07673	4952	chrX	128674252	128726530	5154	+	protein_coding	INPP5F|LOCR|NPHL2|OCRL1	P26063	oculocerebrorenal syndrome of Lowe	NM_000276
266	PAH	NM_000277	0.947016	0.502741	0.509405	0.430866	0.306969	0.564585	0.636284	0.366817	0.501789	0.420783	0.238314	0.476375	0.554867	0.288903	0.413463	0.341861	5053	chr12	103232104	103311381	2681	-	protein_coding	PH|PKU|PKU1	P32811	phenylalanine hydroxylase	NM_000277
267	PAX2	NM_000278	0.998729	0.372961	0.00183693	1.54285e-06	0.00549272	6.19785e-06	4.91779e-06	3.47136e-07	1.19615e-06	3.08525e-06	0.00385001	3.39451e-06	3.58475e-06	0	0	3.47079e-06	5076	chr10	102495466	102589698	6725	+	protein_coding	.	P31035	paired box 2	NM_000278
268	PAX6	NM_000280	1	0.373947	7.05353e-11	3.55993e-07	0	2.11606e-10	0	6.41451e-11	1.06792e-06	0	0	0	0	0	7.13329e-07	0	5080	chr11	31806340	31839509	8769	-	protein_coding	AN|AN2|D11S812E|MGC17209|MGDA|WAGR	P10007	paired box 6	NM_000280
269	PCBD1	NM_000281	0.892092	0.196881	5.95763	5.79289	6.00939	5.99215	5.8672	5.57614	5.8695	5.91054	63.6263	62.3468	57.4273	46.6352	57.1685	59.5857	5092	chr10	72643265	72648543	1412	-	protein_coding	DCOH|PCBD|PCD|PHS	P16720	pterin-4 alpha-carbinolamine dehydratase 1	NM_000281
270	PCCA	NM_000282	1.28095	0.0817465	1.98484	2.34205	1.90212	2.24721	1.76098	2.4252	2.18981	2.39976	2.74802	3.72922	2.39208	4.36493	3.54378	4.30679	5095	chr13	100741269	101182691	2564	+	protein_coding	.	P7029	propionyl-CoA carboxylase alpha subunit	NM_000282
271	PDE6B	NM_000283	1	0.643705	3.23223e-06	3.11699e-06	3.34448e-06	3.3545e-06	2.99772e-06	3.3638e-06	3.26338e-06	2.72378e-06	2.36975e-06	2.24865e-06	2.09139e-06	2.30832e-06	2.18403e-06	1.98299e-06	5158	chr4	619363	664681	4390	+	protein_coding	CSNB3|CSNBAD2|PDEB|RP40|rd1	P17861	phosphodiesterase 6B	NM_000283
272	PDHA1	NM_000284	0.904403	0.024637	4.57225	4.42728	4.59851	4.55561	4.56224	4.46212	4.47271	4.34349	23.3027	22.4063	22.6466	21.0092	21.0933	19.4476	5160	chrX	19362011	19379825	3634	+	protein_coding	PDHA|PDHCE1A|PHE1A	P9151	pyruvate dehydrogenase (lipoamide) alpha 1	NM_000284
273	PEPD	NM_000285	0.968492	0.596141	3.905	3.85881	3.91208	3.98017	3.81819	3.78733	3.79556	3.98478	14.1007	14.7098	13.1184	12.7873	12.818	14.9393	5184	chr19	33877855	34012799	2010	-	protein_coding	MGC10905|PROLIDASE	P7013	peptidase D	NM_000285
274	PEX12	NM_000286	0.926979	0.190955	1.58404	1.47465	1.53525	1.55672	1.6572	1.57901	1.46343	1.37418	1.90497	1.93196	2.15607	1.98461	1.74786	1.60545	5193	chr17	33901814	33905656	2683	-	protein_coding	PAF-3	P16415	peroxisomal biogenesis factor 12	NM_000286
275	PEX6	NM_000287	1.07571	0.57158	1.74063	1.84592	2.05042	1.49757	1.61331	1.88411	1.85665	1.79559	3.152	1.81298	2.06175	2.68724	2.60805	2.49035	5190	chr6	42931611	42946981	3498	-	protein_coding	PAF-2|PAF2|PXAAA1	P27682	peroxisomal biogenesis factor 6	NM_000287
276	PEX7	NM_000288	1.04389	0.641152	3.18663	3.2486	3.39971	3.09109	3.0425	3.21501	3.18654	3.33962	9.58449	7.48258	7.24658	8.27317	8.06171	9.18887	5191	chr6	137143702	137235072	1482	+	protein_coding	PTS2R|RCDP1|RD	P24189	peroxisomal biogenesis factor 7	NM_000288
277	PFKM	NM_000289	1.02584	0.879876	3.86318	3.89999	3.95706	3.68373	3.9332	4.17294	4.00045	3.42528	14.5786	11.7888	14.2897	17.0136	14.9292	9.82301	5213	chr12	48499656	48540187	3734	+	protein_coding	GSD7|MGC8699|PFK-1|PFK1|PFKA|PFKX	P17363	phosphofructokinase, muscle	NM_000289
278	PGAM2	NM_000290	0.985489	0.824814	0.951542	0.930454	0.998641	0.803095	1.04184	0.869857	0.883812	1.03203	1.00161	0.740393	1.0599	0.826057	0.840286	1.05281	5224	chr7	44102326	44105186	857	-	protein_coding	GSD10|MGC88743|PGAM-M|PGAMM	P16582	phosphoglycerate mutase 2	NM_000290
279	PGK1	NM_000291	1.39671	5.40804e-05	7.541	8.02303	7.59238	7.53205	7.49695	8.03241	8.03432	8.00214	192.632	183.17	179.811	260.428	259.826	257.247	5230	chrX	77359666	77382324	2423	+	protein_coding	MGC117307|MGC142128|MGC8947|MIG10|PGKA	P29670	phosphoglycerate kinase 1	NM_000291
280	PHKA2	NM_000292	0.996753	0.887902	2.65395	2.64925	2.60733	2.70523	2.64759	2.67427	2.63971	2.63345	5.11122	5.49445	5.27135	5.37505	5.20457	5.24416	5256	chrX	18910416	19002480	5325	-	protein_coding	GSD9A|MGC133071|PHK|PYK|PYKL|XLG|XLG2	P13920	phosphorylase kinase, alpha 2 (liver)	NM_000292
281	PHKB	NM_000293	1.04977	0.797112	0.231414	0.301484	0	0.000358501	0.60569	0.501794	0.000374465	0.357271	0	0	0.522156	0.415358	0	0.283422	5257	chr16	47495210	47735434	5694	+	protein_coding	DKFZp781E15103|FLJ41698	P21048	phosphorylase kinase beta subunit	NM_000293
282	PHKG2	NM_000294	0.991921	0.925999	2.85617	2.84447	2.92449	2.79569	2.8454	2.65144	2.81812	3.03771	6.61379	5.91344	6.19307	5.27442	6.02053	7.26266	5261	chr16	30759620	30772497	2351	+	protein_coding	GSD9C	P24029	phosphorylase kinase gamma subunit 2	NM_000294
283	SERPINA1	NM_000295	1.04672	0.373851	1.38193e-05	0.0658926	0	4.14576e-05	0	0.189245	4.33039e-05	0	0	0	0	0.139919	0	0	5265	chr14	94843084	94857029	3975	-	protein_coding	A1A|A1AT|AAT|MGC23330|MGC9222|PI|PI1|PRO2275|alpha1AT	P31576	serpin family A member 1	NM_000295
284	PKD1	NM_000296	0.773167	0.236573	2.65554	2.28439	2.39619	2.488	3.00511	2.06593	2.16165	2.57372	4.27897	4.5869	7.03422	3.18138	3.45379	4.98937	5310	chr16	2138711	2185899	14135	-	protein_coding	PBP|Pc-1|TRPP1	P7754	polycystin 1, transient receptor potential channel interacting	NM_000296
285	PKD2	NM_000297	0.972873	0.742056	2.44254	2.40287	2.31872	2.38949	2.60392	2.31746	2.34534	2.53586	4.00292	4.21815	5.08404	3.97824	4.05978	4.8338	5311	chr4	88928799	88998931	5079	+	protein_coding	APKD2|MGC138466|MGC138468|PC2|PKD4|Pc-2|TRPP2	P26296	polycystin 2, transient receptor potential cation channel	NM_000297
286	PKLR	NM_000298	1.00005	0.721381	0.00981176	0.00988063	0.0097814	0.00981493	0.00983894	0.0101295	0.00997941	0.00953289	0.00686476	0.00673459	0.00686109	0.00701744	0.00684413	0.00676363	5313	chr1	155259084	155271225	3164	-	protein_coding	PK1|PKL|PKR|PKRL|RPK	P32653	pyruvate kinase, liver and RBC	NM_000298
287	PKP1	NM_000299	1.00006	0.118292	3.79246e-05	0.000122139	0	0.000113771	0	0.000130943	8.5583e-05	0.000149891	0	7.69745e-05	0	9.01198e-05	5.77789e-05	0.000107476	5317	chr1	201252580	201302121	5447	+	protein_coding	B6P|MGC138829	P7917	plakophilin 1	NM_000299
288	PLA2G2A	NM_000300	1	1	0	0	0	0	0	0	0	0	0	0	0	0	0	0	5320	chr1	20301924	20306932	969	-	protein_coding	MOM1|PLA2|PLA2B|PLA2L|PLA2S|PLAS1|sPLA2	P9503	phospholipase A2 group IIA	NM_000300
289	PLG	NM_000301	1	1	0	0	0	0	0	0	0	0	0	0	0	0	0	0	5340	chr6	161123225	161175085	3537	+	protein_coding	DKFZp779M0222	P13819	plasminogen	NM_000301
290	PLOD1	NM_000302	1.21064	0.0450655	4.38792	4.66369	4.51642	4.39863	4.23493	4.702	4.73358	4.54878	21.9597	19.9903	17.8477	24.9916	25.4763	22.5704	5351	chr1	11994724	12035599	3031	+	protein_coding	FLJ42041|LH|LH1|LLH|PLOD	P4998	procollagen-lysine,2-oxoglutarate 5-dioxygenase 1	NM_000302
291	PMM2	NM_000303	0.946349	0.246395	5.42705	5.3475	5.43092	5.34073	5.50483	5.31246	5.41339	5.3143	42.2785	39.3285	44.4489	38.6799	41.4039	39.0772	5373	chr16	8891670	8943194	2323	+	protein_coding	CDG1|CDG1a|CDGS|PMM 2	P23443	phosphomannomutase 2	NM_000303
292	PMP22	NM_000304	0.863921	0.477439	3.24924	3.03821	3.44955	2.95994	3.29575	2.89234	3.44443	2.66294	9.95568	6.74522	8.82838	6.41429	9.83872	5.37915	5376	chr17	15133094	15168674	2183	-	protein_coding	CMT1A|CMT1E|DSS|GAS-3|HMSNIA|HNPP|MGC20769|Sp110	P15771	peripheral myelin protein 22	NM_000304
293	PON2	NM_000305	0.856944	0.0182737	4.02088	3.79816	4.01548	4.10758	3.93439	3.79394	3.83793	3.76159	15.2222	16.1614	14.3024	12.8505	13.2298	12.6589	5445	chr7	95034174	95064384	1618	-	protein_coding	.	P24392	paraoxonase 2	NM_000305
294	POU1F1	NM_000306	1	1	0	0	0	0	0	0	0	0	0	0	0	0	0	0	5449	chr3	87308783	87325737	1262	-	protein_coding	CPHD1|GHF-1|PIT1|POU1F1a|Pit-1	P11191	POU class 1 homeobox 1	NM_000306
295	POU3F4	NM_000307	1.02153	0.37381	6.45301e-06	0.0307404	0	1.93589e-05	0	5.86841e-06	2.02211e-05	0.0902987	0	0	0	0	0	0.0652957	5456	chrX	82763269	82764775	1507	+	protein_coding	BRAIN-4|BRN4|DFN3|DFNX2|OTF9	P29897	POU class 3 homeobox 4	NM_000307
296	CTSA	NM_000308	1.02517	0.745364	5.93085	5.96672	5.99774	6.02814	5.75098	5.97592	6.06075	5.85619	63.1083	63.9455	52.9059	61.8482	65.4167	57.3502	5476	chr20	44519591	44527458	2240	+	protein_coding	GLB2|GSL|NGBE|PPCA|PPGB	P35032	cathepsin A	NM_000308
297	PPOX	NM_000309	1.48696	0.319487	0.529052	1.10142	0.668243	0.00248546	0.797495	0.000747369	1.38034	1.50241	0.591648	0.000765714	0.738896	0.000230588	1.59664	1.84342	5498	chr1	161136181	161141010	1707	+	protein_coding	MGC8485|PPO|V290M|VP	P7384	protoporphyrinogen oxidase	NM_000309
298	PPT1	NM_000310	0.832139	0.0194127	5.78006	5.51496	5.85307	5.78384	5.69915	5.59257	5.54169	5.40407	56.9885	53.8311	51.0024	47.1826	45.3439	41.6562	5538	chr1	40538382	40563142	2504	-	protein_coding	CLN1|INCL|PPT	P23473	palmitoyl-protein thioesterase 1	NM_000310
299	PROC	NM_000312	1.03493	0.627977	0.0439738	0.0935097	0	0.0626953	0.0682355	2.62176e-05	0.26408	0	0	0.0439976	0.0485196	0	0.199745	0	5624	chr2	128175996	128186822	1780	+	protein_coding	APC|PC|PROC1	P1739	protein C, inactivator of coagulation factors Va and VIIIa	NM_000312
300	PROS1	NM_000313	1.28112	0.0303323	0.606254	0.963659	0.520788	0.768357	0.514841	0.98647	0.827648	1.0667	0.436832	0.699371	0.429438	0.979897	0.77044	1.1021	5627	chr3	93591881	93692934	3580	-	protein_coding	PROS|PS21|PS22|PS23|PS24|PS25|PSA	P32122	protein S (alpha)	NM_000313
301	PTEN	NM_000314	1.03872	0.267285	3.3854	3.44021	3.34121	3.43957	3.37369	3.41267	3.40525	3.50075	9.16574	9.80096	9.37445	9.63462	9.54463	10.3944	5728	chr10	89623195	89731687	8860	+	protein_coding	10q23del|BZS|DEC|GLM2|MGC11227|MHAM|MMAC1|PTEN1|TEP1	P20734	phosphatase and tensin homolog	NM_000314
302	PTH	NM_000315	1	1	0	0	0	0	0	0	0	0	0	0	0	0	0	0	5741	chr11	13513601	13517567	814	-	protein_coding	PTH1	P2580	parathyroid hormone	NM_000315
303	PTH1R	NM_000316	1.00002	0.347134	6.74457e-05	0.000102285	9.90368e-05	3.49227e-06	9.9806e-05	0.0001067	0.000111564	8.85907e-05	6.97837e-05	2.27331e-06	6.95129e-05	7.34178e-05	7.53895e-05	6.36889e-05	5745	chr3	46919236	46945289	2146	+	protein_coding	MGC138426|MGC138452|PFE|PTHR|PTHR1	P24915	parathyroid hormone 1 receptor	NM_000316
304	PTS	NM_000317	0.93609	0.288244	4.1505	4.05522	4.1262	4.03701	4.27793	4.00334	4.09545	4.06534	16.5174	15.3383	18.4165	15.014	16.0109	15.8585	5805	chr11	112097088	112104695	934	+	protein_coding	FLJ97081|PTPS	P21867	6-pyruvoyltetrahydropterin synthase	NM_000317
305	PEX2	NM_000318	0.668548	0.0799004	2.81353	2.23263	2.8037	2.89818	2.73399	2.02446	2.72373	1.77635	6.00093	6.42587	5.65815	3.06272	5.57801	2.45021	5828	chr8	77892494	77913280	4385	-	protein_coding	PAF1|PMP3|PMP35|PXMP3|RNF72|ZWS3	P30048	peroxisomal biogenesis factor 2	NM_000318
306	PEX5	NM_000319	0.854047	0.503802	0.854568	0.626955	0.499994	1.30259	0.626424	0.828799	0.370418	0.645217	0.416182	1.46097	0.544388	0.77498	0.29014	0.56907	5830	chr12	7341759	7371169	2988	+	protein_coding	FLJ50634|FLJ50721|FLJ51948|PTS1-BP|PTS1R|PXR1	P14199	peroxisomal biogenesis factor 5	NM_000319
307	QDPR	NM_000320	0.719213	0.0169012	2.60244	2.12693	2.7522	2.58473	2.45494	2.23717	2.15855	1.97242	5.75464	4.97558	4.48721	3.70873	3.44487	2.94996	5860	chr4	17488016	17513857	1653	-	protein_coding	DHPR|FLJ42391|PKU2|SDR33C1	P18617	quinoid dihydropteridine reductase	NM_000320
308	RB1	NM_000321	1.19435	0.118897	4.20781	4.46404	3.91848	4.34466	4.3218	4.45595	4.54276	4.38929	14.1723	19.2221	19.0167	20.9162	22.1969	20.102	5925	chr13	48877883	49056026	4772	+	protein_coding	OSRC|RB|p105-Rb|pRb|pp110	P30879	retinoblastoma 1	NM_000321
309	PRPH2	NM_000322	1.01883	0.71614	0.0801918	0.107107	0.0295744	0.168373	0.0384008	3.60701e-05	0.153759	0.161835	0.0209039	0.122964	0.0270394	0	0.111651	0.119908	5961	chr6	42664333	42690358	3027	-	protein_coding	AOFMD|AVMD|CACD2|DS|PRPH|RDS|RP7|TSPAN22|rd2	P9532	peripherin 2 (retinal degeneration, slow)	NM_000322
310	RHAG	NM_000324	0.991032	0.723559	0.105541	0.092544	0.140566	0.112505	0.0624698	0.142846	0.0650748	0.0683624	0.102837	0.0804604	0.0443392	0.103854	0.0456605	0.0492303	6005	chr6	49572890	49604587	1928	-	protein_coding	CD241|RH2|RH50A|Rh50|Rh50GP|SLC42A1	P20000	Rh-associated glycoprotein	NM_000324
311	PITX2	NM_000325	0.990133	0.945859	0.973522	0.959216	0.982636	0.721571	1.18004	1.15417	1.03609	0.638345	0.979572	0.644767	1.267	1.22378	1.04502	0.562363	5308	chr4	111538580	111563279	4321	-	protein_coding	ARP1|Brx1|IDG2|IGDS|IGDS2|IHG2|IRID2|MGC111022|MGC20144|Otlx2|PTX2|RGS|RIEG|RIEG1|RS	P33843	paired like homeodomain 2	NM_000325
312	RLBP1	NM_000326	1	1	0	0	0	0	0	0	0	0	0	0	0	0	0	0	6017	chr15	89753098	89764922	1752	-	protein_coding	CRALBP|MGC3663	P25330	retinaldehyde binding protein 1	NM_000326
313	ROM1	NM_000327	0.894515	0.502279	1.48657	1.32575	1.24596	1.66188	1.52137	0.893428	1.45893	1.54264	1.377	2.15433	1.87243	0.855723	1.73981	1.92711	6094	chr11	62380213	62382592	1878	+	protein_coding	ROM|ROSP1|RP7|TSPAN23	P28596	retinal outer segment membrane protein 1	NM_000327
314	RPGR	NM_000328	1.03673	0.533973	1.04814	1.10019	1.13386	0.915727	1.08586	1.1473	1.1349	1.01468	1.19858	0.88128	1.12379	1.21312	1.18963	1.02885	6103	chrX	38128423	38186788	5717	-	protein_coding	COD1|CORDX1|CRD|PCDX|RP15|RP3|XLRP3|orf15	P5412	retinitis pigmentosa GTPase regulator	NM_000328
315	RPE65	NM_000329	1	1	0	0	0	0	0	0	0	0	0	0	0	0	0	0	6121	chr1	68894507	68915642	2608	-	protein_coding	LCA2|RP20|mRPE65|rd12|sRPE65	P25068	retinal pigment epithelium-specific protein 65kDa	NM_000329
316	RS1	NM_000330	1.01059	0.373851	3.13339e-06	0.0152067	0	9.40014e-06	0	0.045138	9.81876e-06	0	0	0	0	0.0316966	0	0	6247	chrX	18657808	18690223	3026	-	protein_coding	RS|XLRS1	P5993	retinoschisin 1	NM_000330
317	SAA1	NM_000331	1	1	0	0	0	0	0	0	0	0	0	0	0	0	0	0	6288	chr11	18287808	18291523	591	+	protein_coding	MGC111216|PIG4|SAA|SAA2|TP53I4	P10193	serum amyloid A1	NM_000331
318	ATXN1	NM_000332	1.83321	0.0248549	0.000424871	0.874798	0	0.000957267	0.000317182	0.449601	0.994866	1.09943	0.000145994	0.000155922	0.000319386	0.364965	0.988754	1.14909	6310	chr6	16299343	16761721	10636	-	protein_coding	ATX1|D6S504E|SCA1	P482	ataxin 1	NM_000332
319	ATXN7	NM_000333	0.988611	0.901028	3.36192	3.3454	3.35314	3.39741	3.33448	3.07715	3.49473	3.4303	9.24964	9.49026	9.09624	7.42732	10.221	9.85116	6314	chr3	63850233	63989136	7524	+	protein_coding	ADCAII|FLJ17787|OPCA3|SCA7	P4587	ataxin 7	NM_000333
320	SCN4A	NM_000334	0.988916	0.579993	0.0263442	0.0102635	0	0.077632	0	6.85994e-06	0.0150929	0.0156361	0	0.0548563	0	0	0.0103771	0.0111013	6329	chr17	62015914	62050278	7805	-	protein_coding	HOKPP2|HYKPP|HYPP|NAC1A|Na(V)1.4|Nav1.4|SkM1	P34810	sodium voltage-gated channel alpha subunit 4	NM_000334
321	SCN5A	NM_000335	0.999988	0.294083	1.87307e-05	8.64567e-07	4.82957e-05	3.97225e-06	3.92371e-06	2.58093e-06	1.27713e-08	0	3.40512e-05	2.65878e-06	2.73803e-06	1.76882e-06	0	0	6331	chr3	38589553	38691163	8768	-	protein_coding	CDCD2|CMD1E|CMPD2|HB1|HB2|HBBD|HH1|ICCD|IVF|LQT3|Nav1.5|PFHB1|SSS1|VF1	P5837	sodium channel, voltage-gated, type V, alpha subunit	NM_000335
322	SCNN1B	NM_000336	2.07712	0.000553914	1.70719	2.76178	1.81987	1.79941	1.4774	2.72573	2.8644	2.68923	2.54103	2.46533	1.78701	5.60744	6.25465	5.48586	6338	chr16	23313591	23392620	2597	+	protein_coding	BESC1|ENaCb|ENaCbeta|SCNEB	P12191	sodium channel epithelial 1 beta subunit	NM_000336
323	SGCD	NM_000337	1.00054	0.784047	0.00145311	0.00223294	0.00435266	2.27742e-06	0	0.0066861	2.37884e-06	0	0.0030515	0	0	0.00462624	0	0	6444	chr5	155753767	156194798	9789	+	protein_coding	35DAG|CMD1L|DAGD|MGC22567|SG-delta|SGCDP|SGD	P15077	sarcoglycan delta	NM_000337
324	SLC12A1	NM_000338	1	1	0	0	0	0	0	0	0	0	0	0	0	0	0	0	6557	chr15	48498498	48596275	4805	+	protein_coding	BSC1|MGC48843|NKCC2	P26222	solute carrier family 12 member 1	NM_000338
325	SLC12A3	NM_000339	0.997127	0.292198	0.00572538	0.00157392	0.0103876	4.5508e-06	0.00676476	1.37951e-06	4.75346e-06	0.00471052	0.00728701	0	0.00471261	0	0	0.00334325	6559	chr16	56899119	56949762	5684	+	protein_coding	FLJ96318|NCCT|TSC	P25071	solute carrier family 12 member 3	NM_000339
326	SLC2A2	NM_000340	1	0.932505	5.14386e-07	4.52645e-07	1.54256e-06	5.93608e-10	0	1.79944e-10	1.35775e-06	0	1.09379e-06	0	0	0	9.07284e-07	0	6514	chr3	170714137	170744768	3439	-	protein_coding	GLUT2	P1743	solute carrier family 2 member 2	NM_000340
327	SLC3A1	NM_000341	1.00213	0.906531	0.0158418	0.0189062	0	0.0470128	0	6.54979e-06	2.25689e-05	0.0559631	0	0.0328246	0	0	0	0.040057	6519	chr2	44502597	44547962	2320	+	protein_coding	ATR1|CSNU1|D2H|FLJ34681|NBAT|RBAT	P20889	solute carrier family 3 member 1	NM_000341
328	SLC4A1	NM_000342	0.97585	0.349632	0.0861121	0.0508439	0.0695072	0.141574	0.0455144	0.0794384	0.0476397	0.0249334	0.0496589	0.102398	0.0321176	0.0564592	0.0332063	0.0177864	6521	chr17	42325758	42345502	4953	-	protein_coding	AE1|BND3|CD233|DI|EMPB3|EPB3|FR|MGC116750|MGC116753|MGC126619|MGC126623|RTA1A|SW|WD|WD1|WR	P3529	solute carrier family 4 member 1 (Diego blood group)	NM_000342
329	SLC5A1	NM_000343	0.999986	0.374017	2.08054e-05	5.62251e-09	0	6.24152e-05	0	3.79407e-09	1.30735e-08	0	0	4.21921e-05	0	0	0	0	6523	chr22	32439019	32509011	5231	+	protein_coding	D22S675|NAGT|SGLT1	P24614	solute carrier family 5 member 1	NM_000343
330	SMN1	NM_000344	0.95368	0.58995	1.84365	1.77523	1.77331	1.87779	1.87735	1.59102	1.97633	1.73171	2.42683	2.66187	2.67658	2.00919	2.92032	2.33947	6606	chr5	69345350	70248838	2197	+	protein_coding	BCD541|SMA|SMA1|SMA2|SMA3|SMA4|SMA@|SMN|SMN2|SMNT|T-BCD541	P27531	survival of motor neuron 1, telomeric	NM_000344
331	SMN1	NM_000344_1	1.08396	0.497903	1.10866	1.22496	1.17627	1.27691	0.836928	1.28699	1.02939	1.33979	1.26437	1.41613	0.787255	1.43803	1.03491	1.54209	6606	chr5	69345350	70248838	2197	+	protein_coding	BCD541|SMA|SMA1|SMA2|SMA3|SMA4|SMA@|SMN|SMN2|SMNT|T-BCD541	P27531	survival of motor neuron 1, telomeric	NM_000344_1
332	SNCA	NM_000345	1	1	0	0	0	0	0	0	0	0	0	0	0	0	0	0	6622	chr4	90645250	90759447	3494	-	protein_coding	MGC110988|NACP|PARK1|PARK4|PD1	P6665	synuclein, alpha (non A4 component of amyloid precursor)	NM_000345
333	SOX9	NM_000346	1.34375	0.0172347	2.42489	2.85116	2.33132	2.54787	2.38662	2.88914	2.96256	2.68798	4.0479	4.82254	4.23383	6.39925	6.76274	5.48428	6662	chr17	70117161	70122560	3934	+	protein_coding	CMD1|CMPD1|SRA1	P11849	SRY-box 9	NM_000346
334	SPTB	NM_000347	1.00061	0.926118	0.00589913	0.00678457	0	0.0176255	0	2.34946e-06	0.0202564	0	0	0.0121537	0	0	0.0139792	0	6710	chr14	65213001	65289866	10467	-	protein_coding	EL3|HS2|HSPTB1|SPH2	P2689	spectrin beta, erythrocytic	NM_000347
335	SRD5A2	NM_000348	0.967961	0.167725	0.0469918	1.31991e-05	0	0.0444083	0.0949999	8.90677e-06	3.06905e-05	0	0	0.0309673	0.0681627	0	0	0	6716	chr2	31749656	31806040	2445	-	protein_coding	MGC138457	P7599	steroid 5 alpha-reductase 2	NM_000348
336	STAR	NM_000349	1.04884	0.14023	0.0390329	0.107828	0.0335156	0.0400995	0.0434658	0.100295	0.172947	0.047487	0.0236971	0.0278648	0.0306523	0.0718192	0.126506	0.033993	6770	chr8	38000218	38008600	2695	-	protein_coding	STARD1	P22025	steroidogenic acute regulatory protein	NM_000349
337	ABCA4	NM_000350	0.979372	0.64016	0.491359	0.461288	0.401994	0.585299	0.48091	0.421615	0.451932	0.508949	0.322751	0.497689	0.396081	0.338769	0.365512	0.426636	24	chr1	94458394	94586705	7325	-	protein_coding	ABC10|ABCR|ARMD2|CORD3|DKFZp781N1972|FFM|FLJ17534|RMP|RP19|STGD|STGD1	P24515	ATP binding cassette subfamily A member 4	NM_000350
338	STS	NM_000351	0.9498	0.19402	1.70367	1.62937	1.71536	1.62388	1.7681	1.66661	1.59311	1.62745	2.2915	2.07114	2.40836	2.17129	2.00581	2.10592	412	chrX	7137472	7272682	6377	+	protein_coding	ARSC|ARSC1|ASC|ES|SSDD|XLI	P9322	steroid sulfatase (microsomal), isozyme S	NM_000351
339	ABCC8	NM_000352	1.05712	0.46278	0.193119	0.273254	0.193012	0.190442	0.195898	0.0849762	0.295529	0.419633	0.143876	0.140042	0.145649	0.0604619	0.225876	0.340188	6833	chr11	17414432	17498392	4921	-	protein_coding	ABC36|HHF1|HI|HRINS|MRP8|PHHI|SUR|SUR1|TNDM2	P19463	ATP binding cassette subfamily C member 8	NM_000352
340	TAT	NM_000353	0.940562	0.18685	0.149629	0.0612237	0.215588	0.18503	0.0424135	0.0498492	0.0871916	0.0462733	0.161842	0.135947	0.029906	0.035036	0.0617197	0.0331633	6898	chr16	71600754	71610998	2757	-	protein_coding	.	P3075	tyrosine aminotransferase	NM_000353
341	SERPINA7	NM_000354	1	1	0	0	0	0	0	0	0	0	0	0	0	0	0	0	6906	chrX	105277190	105282718	1596	-	protein_coding	FLJ17820|TBG	P21749	serpin family A member 7	NM_000354
342	TCN2	NM_000355	1.10804	0.727078	0.413172	0.561177	0.293179	0.823272	0.000112503	1.03936	0.000788696	0.454761	0.226535	0.766014	0.000173782	1.05408	3.61315e-05	0.373968	6948	chr22	31003070	31023047	1991	+	protein_coding	D22S676|D22S750|II|TC|TC II|TC-2|TC2|TCII	P23111	transcobalamin 2	NM_000355
343	TCOF1	NM_000356	1.00032	0.311375	0.000211516	0.000670509	0	0.000634455	0	1.64635e-07	0.00102476	0.000986365	0	0.000431196	0	0	0.000697044	0.00070262	6949	chr5	149737202	149779871	6077	+	protein_coding	MFD1|treacle	P4938	treacle ribosome biogenesis factor 1	NM_000356
344	TGFBI	NM_000358	0.810923	0.048197	4.05733	3.75496	4.2207	4.02797	3.90571	3.80219	3.77602	3.68402	17.7001	15.2391	14.0013	12.93	12.6314	11.9452	7045	chr5	135364584	135399507	2805	+	protein_coding	BIGH3|CDB1|CDG2|CDGG1|CSD|CSD1|CSD2|CSD3|EBMD|LCD1	P28645	transforming growth factor beta induced	NM_000358
345	TGM1	NM_000359	1.03741	0.542329	0.628594	0.681584	0.587495	0.625479	0.671579	0.53883	0.798066	0.696114	0.504681	0.539566	0.59346	0.451922	0.734886	0.62518	7051	chr14	24718320	24732416	2777	-	protein_coding	ICR2|KTG|LI|LI1|TGASE|TGK	P35404	transglutaminase 1	NM_000359
346	TH	NM_000360	1.16386	0.318378	2.08029	2.29921	2.14822	1.97797	2.10923	2.50312	1.90967	2.41665	3.44469	2.92322	3.31798	4.66269	2.74094	4.36941	7054	chr11	2185159	2193035	2019	-	protein_coding	DYT14|DYT5b|TYH	P18678	tyrosine hydroxylase	NM_000360
347	THBD	NM_000361	1.08172	0.139372	2.92622	3.03955	2.97237	2.96043	2.84231	3.11619	3.03985	2.95829	6.87136	6.74946	6.17793	7.65977	7.18702	6.82277	7056	chr20	23026270	23030301	4032	-	protein_coding	AHUS6|CD141|THRM|TM	P31057	thrombomodulin	NM_000361
348	TIMP3	NM_000362	0.845696	0.00412352	3.30621	3.06442	3.28444	3.36146	3.27107	3.11987	3.04964	3.02197	8.77212	9.23367	8.66183	7.68126	7.24065	7.17825	7078	chr22	33196802	33259028	5486	+	protein_coding	HSMRK222|K222|K222TA2|SFD	P10215	TIMP metallopeptidase inhibitor 3	NM_000362
349	TNNI3	NM_000363	1.35156	0.0443642	0.270163	0.704787	0.354733	0.285213	0.164133	0.886005	0.455784	0.739964	0.280098	0.216818	0.120754	0.846951	0.369105	0.674874	7137	chr19	55663136	55669100	841	-	protein_coding	CMD1FF|CMD2A|CMH7|MGC116817|RCM1|TNNC1|cTnI	P27602	troponin I3, cardiac type	NM_000363
350	TNNT2	NM_000364	1.00024	0.37055	9.2989e-07	0.000349985	2.56755e-06	2.22117e-07	0	7.06981e-06	2.32009e-07	0.0010424	1.92429e-06	0	0	4.80963e-06	0	0.000742036	7139	chr1	201328136	201346828	1363	-	protein_coding	CMH2|CMPD2|LVNC6|MGC3889|RCM3|TnTC|cTnT	P27646	troponin T2, cardiac type	NM_000364
351	TPI1	NM_000365	1.0265	0.733769	9.15925	9.19698	9.31917	9.17057	8.96643	9.15061	9.24419	9.19463	639.892	572.42	499.706	566.492	602.312	589.244	7167	chr12	6976584	6980110	2009	+	protein_coding	MGC88108|TPI	P30381	triosephosphate isomerase 1	NM_000365
352	TPM1	NM_000366	0.797069	0.1342	3.27613	2.94891	3.3231	3.38817	3.10176	2.70505	2.84843	3.23909	9.03678	9.42596	7.59209	5.51134	6.16715	8.50267	7168	chr15	63334838	63364113	3301	+	protein_coding	C15orf13|CMD1Y|HTM-alpha|TMSA	P30771	tropomyosin 1 (alpha)	NM_000366
353	TPMT	NM_000367	1.09936	0.0542828	2.54444	2.6811	2.48639	2.55406	2.59093	2.73097	2.6008	2.70821	4.61999	4.84794	5.02981	5.63075	5.03958	5.57521	7172	chr6	18128545	18155396	3269	-	protein_coding	.	P7100	thiopurine S-methyltransferase	NM_000367
354	TSC1	NM_000368	1.12233	0.529197	2.52676	2.69327	2.45659	2.25949	2.80961	2.98174	2.65943	2.37463	4.50517	3.76671	6.01645	6.89004	5.29045	4.21997	7248	chr9	135766735	135820020	8613	-	protein_coding	KIAA0243|LAM|MGC86987|TSC	P17013	tuberous sclerosis 1	NM_000368
355	TSHR	NM_000369	1.01209	0.662769	0.0403729	0.0577165	0.0199505	0.02399	0.0764859	0.0603561	6.44295e-05	0.110608	0.0140534	0.0165541	0.0545352	0.0426053	0	0.0805509	7253	chr14	81421869	81612646	5141	+	protein_coding	CHNG1|LGR3|MGC75129|hTSHR-I	P4294	thyroid stimulating hormone receptor	NM_000369
356	TTPA	NM_000370	0.933956	0.11427	0.397172	0.298599	0.394864	0.332231	0.461523	0.24445	0.297204	0.352133	0.316077	0.257279	0.377396	0.184215	0.227119	0.279038	7274	chr8	63972048	63998612	2632	-	protein_coding	ATTP|AVED|TTP1|alphaTTP	P13563	tocopherol (alpha) transfer protein	NM_000370
357	TTR	NM_000371	0.917596	0.133812	0.124104	3.5927e-05	0.218422	7.99747e-05	0.145322	2.42435e-05	8.35362e-05	0	0.164094	0	0.106117	0	0	0	7276	chr18	29171730	29178986	928	+	protein_coding	HsT2651|PALB|TBPA	P9953	transthyretin	NM_000371
358	TYR	NM_000372	1	1	0	0	0	0	0	0	0	0	0	0	0	0	0	0	7299	chr11	88911040	89028927	2065	+	protein_coding	OCA1A|OCAIA|SHEP3	P10690	tyrosinase	NM_000372
359	UMPS	NM_000373	0.837543	1.0165e-05	3.43174	3.17598	3.43033	3.44262	3.42219	3.1616	3.1815	3.18472	9.81214	9.82513	9.72887	7.9357	8.02903	8.1549	7372	chr3	124449213	124468119	6836	+	protein_coding	OPRT	P6471	uridine monophosphate synthetase	NM_000373
360	UROD	NM_000374	0.930363	0.139371	4.23948	4.13534	4.2583	4.2672	4.19176	4.04813	4.12271	4.22942	18.1969	18.1665	17.2912	15.5188	16.3344	17.8878	7389	chr1	45477805	45481341	1571	+	protein_coding	PCT|UPD	.	uroporphyrinogen decarboxylase	NM_000374
361	UROS	NM_000375	0.903021	0.23392	4.58053	4.43336	4.60273	4.58866	4.54966	4.26813	4.37804	4.62975	23.3739	22.949	22.4414	18.2393	19.6885	23.9283	7390	chr10	127477147	127511837	1354	-	protein_coding	.	P16410	uroporphyrinogen III synthase	NM_000375
362	VDR	NM_000376	0.974381	0.836939	2.16336	2.12592	2.19248	2.07495	2.21863	2.09187	1.82611	2.40206	3.58285	3.19661	3.658	3.25791	2.53049	4.31496	7421	chr12	48235320	48298814	5243	-	protein_coding	NR1I1	P9880	vitamin D (1,25- dihydroxyvitamin D3) receptor	NM_000376
363	WAS	NM_000377	1.07159	0.341687	0.53758	0.637335	0.591665	0.557711	0.460155	0.779812	0.618785	0.49965	0.508945	0.469132	0.376175	0.715846	0.532455	0.41777	7454	chrX	48542186	48549817	1830	+	protein_coding	IMD2|THC|THC1|WASP	P287	Wiskott-Aldrich syndrome	NM_000377
364	WT1	NM_000378	1	1	0	0	0	0	0	0	0	0	0	0	0	0	0	0	7490	chr11	32409322	32457081	3398	-	protein_coding	AWT1|GUD|WAGR|WIT-2|WT33	P28621	Wilms tumor 1	NM_000378
365	XDH	NM_000379	1.00062	0.964138	0.0218091	0.0227036	0.0452718	2.77567e-05	0.019771	0.0461559	2.89928e-05	0.0215565	0.0320768	0	0.0138308	0.0324192	0	0.0153157	7498	chr2	31557188	31637611	5717	-	protein_coding	XO|XOR	P202	xanthine dehydrogenase	NM_000379
366	XPA	NM_000380	0.930767	0.634836	2.96365	2.86014	2.7249	3.21899	2.9031	3.02389	2.5612	2.95364	5.63117	8.27335	6.48667	7.12311	4.87338	6.79662	7507	chr9	100437191	100459691	1700	-	protein_coding	XP1|XPAC	P17403	xeroderma pigmentosum, complementation group A	NM_000380
367	MID1	NM_000381	1	0.167928	1.4006e-09	6.85321e-06	0	4.20181e-09	0	1.27372e-09	1.4099e-05	6.45932e-06	0	0	0	0	9.48152e-06	4.68292e-06	4281	chrX	10413350	10851809	8769	-	protein_coding	.	P10587	midline 1	NM_000381
368	ALDH3A2	NM_000382	0.900641	0.226107	3.79864	3.64767	3.75771	3.67633	3.94825	3.76607	3.61691	3.55157	12.568	11.7254	14.4495	12.5862	11.2088	10.8082	224	chr17	19552064	19580904	3823	+	protein_coding	ALDH10|DKFZp686E23276|FALDH|FLJ20851|SLS	P34034	aldehyde dehydrogenase 3 family member A2	NM_000382
369	AIRE	NM_000383	1	1	0	0	0	0	0	0	0	0	0	0	0	0	0	0	326	chr21	45705721	45718102	2299	+	protein_coding	AIRE1|APECED|APS1|APSI|PGA1	P1500	autoimmune regulator	NM_000383
370	APOB	NM_000384	0.999063	0.854713	0.00686051	0.00550871	0.00603406	0.0145106	0	2.298e-06	0.0164612	0	0.00423261	0.00998952	0	0	0.0113383	0	338	chr2	21224301	21266945	14121	-	protein_coding	FLDB|LDLCQ4	P25486	apolipoprotein B	NM_000384
371	BLMH	NM_000386	0.925324	0.127427	3.35017	3.2382	3.33705	3.40945	3.30192	3.33102	3.21451	3.16395	9.13561	9.57898	8.87085	9.0497	8.23846	8.02405	642	chr17	28575213	28619184	2537	-	protein_coding	BH|BMH	P7731	bleomycin hydrolase	NM_000386
372	SLC25A20	NM_000387	0.927607	0.37296	2.39121	2.28279	2.26398	2.57369	2.31656	2.28622	2.34436	2.21489	3.81641	4.93031	3.98537	3.87172	4.05696	3.67105	788	chr3	48894356	48936426	1892	-	protein_coding	CAC|CACT	P2528	solute carrier family 25 member 20	NM_000387
373	CASR	NM_000388	1.01167	0.37381	3.50388e-06	0.0167366	0	1.05116e-05	0	3.18645e-06	1.09797e-05	0.0496246	0	0	0	0	0	0.0354456	846	chr3	121902530	122005344	5265	+	protein_coding	CAR|EIG8|FHH|FIH|GPRC2A|HHC|HHC1|MGC138441|NSHPT|PCAR1	P28222	calcium sensing receptor	NM_000388
374	CDKN1A	NM_000389	1.13597	0.00959187	6.37913	6.56306	6.42118	6.32106	6.39333	6.60416	6.57009	6.51349	84.9799	78.5583	83.1392	96.143	93.5341	91.0229	1026	chr6	36644237	36655116	2793	+	protein_coding	CAP20|CDKN1|CIP1|MDA-6|P21|SDI1|WAF1|p21CIP1	P18697	cyclin-dependent kinase inhibitor 1A	NM_000389
375	CHM	NM_000390	1.09291	0.222914	2.36675	2.49492	2.24557	2.3168	2.52326	2.52871	2.42377	2.52974	3.7558	3.96142	4.75332	4.76352	4.34274	4.80926	1121	chrX	85116185	85302566	7934	-	protein_coding	DXS540|FLJ38564|GGTA|HSD-32|MGC102710|REP-1|TCD	P28926	CHM, Rab escort protein 1	NM_000390
376	TPP1	NM_000391	1.07418	0.123335	3.49667	3.59991	3.4727	3.55513	3.46033	3.519	3.60983	3.66706	10.1361	10.7011	10.0168	10.4478	11.1513	11.7869	1200	chr11	6633997	6640692	3533	-	protein_coding	CLN2|LPIC|MGC21297	P25289	tripeptidyl peptidase 1	NM_000391
377	ABCC2	NM_000392	0.983508	0.662114	0.643486	0.619495	0.702657	0.59133	0.63428	0.644829	0.540273	0.670124	0.62976	0.503639	0.552774	0.562593	0.45129	0.596051	1244	chr10	101542355	101611949	5446	+	protein_coding	ABC30|CMOAT|DJS|KIAA1010|MRP2|cMRP	P25892	ATP binding cassette subfamily C member 2	NM_000392
378	COL5A2	NM_000393	0.930862	0.131858	1.83552	1.73216	1.85595	1.79552	1.85426	1.82963	1.65365	1.7075	2.62864	2.45886	2.61819	2.55059	2.13416	2.28379	1290	chr2	189896641	190044605	6930	-	protein_coding	MGC105115	P17617	collagen type V alpha 2	NM_000393
379	CRYAA	NM_000394	1	1	0	0	0	0	0	0	0	0	0	0	0	0	0	0	1409	chr21	44589118	44592920	1144	+	protein_coding	CRYA1|HSPB4	P17491	crystallin alpha A	NM_000394
380	CSF2RB	NM_000395	1.00201	0.933091	0.021609	0.0245053	0	0.0638795	0	8.6125e-06	0.0722931	0	0	0.0448954	0	0	0.0509565	0	1439	chr22	37309675	37336479	4846	+	protein_coding	CD131|CDw131|IL3RB|IL5RB	P33441	colony stimulating factor 2 receptor beta common subunit	NM_000395
381	CTSK	NM_000396	1.05139	0.39286	1.16789	1.24018	1.04493	1.22989	1.22139	1.29383	1.28018	1.14167	1.06742	1.33852	1.33307	1.44957	1.42118	1.21617	1513	chr1	150768684	150780917	1810	-	protein_coding	CTS02|CTSO|CTSO1|CTSO2|MGC23107|PKND|PYCD	P7595	cathepsin K	NM_000396
382	CYBB	NM_000397	1.03432	0.634237	0.19897	0.247657	0.313491	0.0486266	0.222365	0.149152	0.344686	0.2425	0.243677	0.0337675	0.166871	0.108639	0.268284	0.184863	1536	chrX	37639270	37672714	4318	+	protein_coding	CGD|GP91-1|GP91-PHOX|GP91PHOX|NOX2|p91-PHOX	P4028	cytochrome b-245, beta polypeptide	NM_000397
383	CYB5R3	NM_000398	1.15335	0.0823647	5.28701	5.49284	5.38095	5.29497	5.17794	5.40181	5.61638	5.45149	40.806	38.0683	35.2353	41.2156	47.8149	43.0711	1727	chr22	43013846	43045405	3333	-	protein_coding	B5R|DIA1	P2	cytochrome b5 reductase 3	NM_000398
384	EGR2	NM_000399	0.999932	0.373887	9.81824e-05	2.73134e-08	0	6.08014e-08	0.000294466	1.84311e-08	6.35092e-08	0	0	0	0.000204964	0	0	0	1959	chr10	64571756	64578927	3162	-	protein_coding	AT591|CMT1D|CMT4E|DKFZp686J1957|FLJ14547|KROX20	P21915	early growth response 2	NM_000399
385	ERCC2	NM_000400	1.04777	0.356447	4.00723	4.07455	4.03859	3.98575	3.9968	4.18432	4.0561	3.97552	15.4854	14.7683	14.9791	17.1554	15.5537	14.8411	2068	chr19	45854649	45873845	2716	-	protein_coding	COFS2|EM9|MGC102762|MGC126218|MGC126219|TTD|XPD	P24672	excision repair cross-complementation group 2	NM_000400
386	EXT2	NM_000401	1.14645	0.693589	0.251712	0.448891	0.000197557	0.652275	0.000110453	1.06669	0.000508284	0	0.000368849	0.569039	0.000142899	1.09347	0	0.000243868	2132	chr11	44117099	44266980	3921	+	protein_coding	SOTV	P32525	exostosin glycosyltransferase 2	NM_000401
387	G6PD	NM_000402	1.00551	0.914946	9.01114	9.01906	9.09355	9.05334	8.87749	8.99385	8.99271	9.06927	547.111	527.672	469.769	508.061	505.802	540.119	2539	chrX	153759605	153775801	2515	-	protein_coding	G6PD1	P7418	glucose-6-phosphate dehydrogenase	NM_000402
388	GALE	NM_000403	0.670315	0.252746	1.75665	1.17957	1.42985	1.36458	2.28339	0.605694	1.3501	1.44586	1.70028	1.56631	3.87104	0.520157	1.54029	1.73786	2582	chr1	24122089	24127294	1724	-	protein_coding	FLJ95174|FLJ97302|SDR1E1	P25862	UDP-galactose-4-epimerase	NM_000403
389	GLB1	NM_000404	1.0074	0.750754	5.15994	5.17057	5.19733	5.16206	5.11937	5.15375	5.21294	5.14406	35.8089	34.6322	33.793	34.5466	35.9045	34.614	2720	chr3	33038100	33138694	2588	-	protein_coding	EBP|ELNR1	P5449	galactosidase beta 1	NM_000404
390	GM2A	NM_000405	1.11973	0.111442	3.3132	3.47635	3.42065	3.29189	3.21984	3.51692	3.54118	3.36467	9.74063	8.74898	8.3253	10.4319	10.588	9.37021	2760	chr5	150632613	150649953	6575	+	protein_coding	SAP-3	P15052	GM2 ganglioside activator	NM_000405
391	GNRHR	NM_000406	1	0.331683	0.000357868	0.00036386	0.000360193	0.000362008	0.000351402	0.000365608	0.000370334	0.000355639	0.000253318	0.000245571	0.000244629	0.000251804	0.000250997	0.000254463	2798	chr4	68603099	68621804	5709	-	protein_coding	GNRHR1|GRHR|LHRHR|LRHR	P26464	gonadotropin releasing hormone receptor	NM_000406
392	GP1BB	NM_000407	1.22294	0.419473	1.97586	2.26622	2.09894	1.32946	2.32304	1.84756	2.5233	2.34595	3.29527	1.50196	4.00753	2.59443	4.7272	4.11235	2812	chr22	19711066	19712297	958	+	protein_coding	CD42c	P3059	glycoprotein Ib platelet beta subunit	NM_000407
393	GPD2	NM_000408	1.26007	0.000377511	4.21226	4.54577	4.18567	4.23339	4.21732	4.56136	4.49694	4.57774	17.2572	17.7187	17.6187	22.5777	21.4701	23.0433	2820	chr2	157291965	157442915	6155	+	protein_coding	GDH2|GPDM|mGPDH	P26320	glycerol-3-phosphate dehydrogenase 2	NM_000408
394	GUCA1A	NM_000409	1	1	0	0	0	0	0	0	0	0	0	0	0	0	0	0	2978	chr6	42123144	42147794	1904	+	protein_coding	C6orf131|COD3|CORD14|GCAP|GCAP1|GUCA|GUCA1|dJ139D8.6	P10942	guanylate cyclase activator 1A	NM_000409
395	HFE	NM_000410	1.12227	0.543199	1.4694	1.63582	1.11085	1.91648	1.24641	1.64599	1.67687	1.58301	1.16487	2.7628	1.37412	2.12643	2.18618	2.01106	3077	chr6	26087509	26095469	3489	+	protein_coding	HFE1|HH|HLA-H|MGC103790|MVCD7|dJ221C16.10.1	P3923	hemochromatosis	NM_000410
396	HLCS	NM_000411	0.895046	0.17198	2.79113	2.63116	2.88346	2.7957	2.68757	2.59561	2.50852	2.7763	6.3996	5.91469	5.44761	5.03647	4.66411	5.89372	3141	chr21	38123189	38362545	7368	-	protein_coding	HCS	P4800	holocarboxylase synthetase	NM_000411
397	HRG	NM_000412	1	1	0	0	0	0	0	0	0	0	0	0	0	0	0	0	3273	chr3	186383747	186396023	2003	+	protein_coding	DKFZp779H1622|HPRG|HRGP	P18744	histidine rich glycoprotein	NM_000412
398	HSD17B1	NM_000413	0.875507	0.395612	1.81369	1.62188	1.92162	2.00932	1.44985	1.60128	1.80705	1.4329	2.79732	3.0122	1.73377	2.03079	2.48641	1.71479	3292	chr17	40703984	40707232	2231	+	protein_coding	EDH17B2|EDHB17|HSD17|MGC138140|SDR28C1	P34433	hydroxysteroid (17-beta) dehydrogenase 1	NM_000413
399	HSD17B4	NM_000414	0.983024	0.5011	5.30173	5.27703	5.34579	5.24029	5.31706	5.2555	5.2939	5.28142	39.7984	36.6164	38.9025	37.1441	38.0332	38.1717	3295	chr5	118788138	118878030	3066	+	protein_coding	DBP|MFE-2|SDR8C1	P25754	hydroxysteroid (17-beta) dehydrogenase 4	NM_000414
400	IAPP	NM_000415	1.02982	0.373949	8.77952e-06	0.0424031	0	2.63384e-05	0	7.98415e-06	0.123637	0	0	0	0	0	0.0888536	0	3375	chr12	21525802	21532914	1976	+	protein_coding	DAP|IAP	P3277	islet amyloid polypeptide	NM_000415
401	IFNGR1	NM_000416	1.10687	0.0315817	3.07267	3.21917	3.09225	3.08075	3.0446	3.29884	3.17875	3.17648	7.55396	7.42264	7.25841	8.82843	8.01364	8.10024	3459	chr6	137518621	137540567	2120	-	protein_coding	CD119|FLJ45734|IFNGR	P21302	interferon gamma receptor 1	NM_000416
402	IL2RA	NM_000417	1	1	0	0	0	0	0	0	0	0	0	0	0	0	0	0	3559	chr10	6052657	6104333	3216	-	protein_coding	CD25|IDDM10|IL2R|TCGFR	P496	interleukin 2 receptor, alpha	NM_000417
403	IL4R	NM_000418	1.59886	0.060531	2.58501	3.26206	2.48815	2.52571	2.72932	3.33515	3.54108	2.81719	4.62865	4.73126	5.63734	9.07969	10.5931	6.09493	3566	chr16	27325230	27376099	4085	+	protein_coding	CD124|IL4RA	P1968	interleukin 4 receptor	NM_000418
404	ITGA2B	NM_000419	1.12104	0.153437	0.750062	0.914906	0.854065	0.660346	0.729051	0.825892	0.856218	1.05201	0.810524	0.576787	0.658312	0.771339	0.805727	1.08098	3674	chr17	42449550	42466873	3334	-	protein_coding	CD41|CD41B|GP2B|GPIIb|GTA|HPA3	P21116	integrin subunit alpha 2b	NM_000419
405	KEL	NM_000420	1.00373	0.914797	0.030981	0.0363565	0	4.19407e-05	0.0909765	0.106391	4.38085e-05	0	0	0	0.0651873	0.0763644	0	0	3792	chr7	142638201	142659503	2547	-	protein_coding	CD238|ECE3	P32092	Kell blood group, metallo-endopeptidase	NM_000420
406	KRT10	NM_000421	0.878856	0.186619	3.87079	3.68449	3.99956	3.89021	3.70767	3.52488	3.71178	3.80303	15.0429	13.7606	12.0772	10.4937	12.0389	13.0534	3858	chr17	38974369	38978863	2140	-	protein_coding	CK10|K10|KPP	P24737	keratin 10	NM_000421
407	KRT17	NM_000422	0.824708	0.221946	1.95378	1.67573	2.02004	1.99969	1.83451	1.46921	1.45081	2.02931	3.06564	2.98493	2.56905	1.76548	1.72262	3.1036	3872	chr17	39775692	39780882	1574	-	protein_coding	K17|PC|PC2|PCHC1	P23614	keratin 17	NM_000422
408	KRT2	NM_000423	1	1	0	0	0	0	0	0	0	0	0	0	0	0	0	0	3849	chr12	53038342	53045959	2414	-	protein_coding	CK-2e|K2e|KRT2A|KRT2E|KRTE|MGC116967|MGC116968	P21948	keratin 2	NM_000423
409	KRT5	NM_000424	0.957254	0.033918	0.0630449	1.78345e-05	0.0397677	0.0473599	0.101226	1.20347e-05	4.14684e-05	0	0.0281362	0.0330579	0.0727878	0	0	0	3852	chr12	52908359	52914243	2303	-	protein_coding	CK5|DDD|EBS2|K5|KRT5A	P21453	keratin 5	NM_000424
410	L1CAM	NM_000425	1.00127	0.994648	0.234224	0.236053	0	0.201006	0.463958	0.616425	0.000325689	0	0	0.148393	0.379685	0.532382	0	0	3897	chrX	153126969	153151628	5141	-	protein_coding	CAML1|CD171|HSAS|HSAS1|MASA|MIC5|N-CAML1|S10|SPG1	P32043	L1 cell adhesion molecule	NM_000425
411	LAMA2	NM_000426	0.995943	0.271584	0.0188243	0.0129596	0.0176325	0.0159307	0.0229004	0.0202649	0.00607882	0.0125	0.012396	0.0109669	0.0160346	0.0140964	0.00414923	0.00887365	3908	chr6	129204286	129837710	9692	+	protein_coding	LAMM	P17329	laminin subunit alpha 2	NM_000426
412	LOR	NM_000427	1	1	0	0	0	0	0	0	0	0	0	0	0	0	0	0	4014	chr1	153232179	153234600	1229	+	protein_coding	MGC111513	P20610	loricrin	NM_000427
413	LTBP2	NM_000428	1.18107	0.0379504	1.03555	1.27564	1.13443	0.991259	0.975601	1.21292	1.2201	1.3871	1.19964	0.982119	0.967579	1.31601	1.32255	1.62675	4053	chr14	74964886	75079034	8554	-	protein_coding	C14orf141|GLC3D|LTBP3|MSTP031	P32816	latent transforming growth factor beta binding protein 2	NM_000428
414	MAT1A	NM_000429	0.960554	0.29413	0.107568	0.0495066	0.102122	0.120948	0.0995384	3.02915e-05	0.000104375	0.143575	0.0737449	0.0867981	0.0715426	0	0	0.105724	4143	chr10	82031576	82049434	3404	-	protein_coding	MAT|MATA1|SAMS|SAMS1	P13247	methionine adenosyltransferase 1A	NM_000429
415	PAFAH1B1	NM_000430	0.962476	0.00603853	4.64991	4.59473	4.64389	4.64043	4.66529	4.59755	4.5817	4.60485	24.0803	23.8227	24.3975	23.1754	22.8264	23.5057	5048	chr17	2496923	2588909	5614	+	protein_coding	LIS1|LIS2|MDCR|MDS|PAFAH	P36233	platelet activating factor acetylhydrolase 1b regulatory subunit 1	NM_000430
416	MVK	NM_000431	1.00391	0.967933	4.00127	4.0069	4.15468	4.08312	3.73146	4.05176	3.92111	4.04415	16.8653	15.8712	12.2952	15.5613	14.074	15.6107	4598	chr12	110011500	110035075	2160	+	protein_coding	FLJ96772|LRBP|MK|MVLK	P13949	mevalonate kinase	NM_000431
417	MYL2	NM_000432	1	1	0	0	0	0	0	0	0	0	0	0	0	0	0	0	4633	chr12	111348624	111358404	829	-	protein_coding	CMH10|DKFZp779C0562|MLC2	P27489	myosin light chain 2	NM_000432
418	NCF2	NM_000433	1	1	0	0	0	0	0	0	0	0	0	0	0	0	0	0	4688	chr1	183524697	183560056	2249	-	protein_coding	FLJ93058|NCF-2|NOXA2|P67-PHOX|P67PHOX	P25943	neutrophil cytosolic factor 2	NM_000433
419	NEU1	NM_000434	1	1	0	0	0	0	0	0	0	0	0	0	0	0	0	0	4758	chr6	31826829	31830709	2071	-	protein_coding	FLJ93471|NANH|NEU|SIAL1	P8178	neuraminidase 1 (lysosomal sialidase)	NM_000434
420	NEU1	NM_000434_1	1	1	0	0	0	0	0	0	0	0	0	0	0	0	0	0	4758	chr6	31826829	31830709	2071	-	protein_coding	FLJ93471|NANH|NEU|SIAL1	P8178	neuraminidase 1 (lysosomal sialidase)	NM_000434_1
421	NEU1	NM_000434_2	1	1	0	0	0	0	0	0	0	0	0	0	0	0	0	0	4758	chr6	31826829	31830709	2071	-	protein_coding	FLJ93471|NANH|NEU|SIAL1	P8178	neuraminidase 1 (lysosomal sialidase)	NM_000434_2
422	NEU1	NM_000434_3	1	1	0	0	0	0	0	0	0	0	0	0	0	0	0	0	4758	chr6	31826829	31830709	2071	-	protein_coding	FLJ93471|NANH|NEU|SIAL1	P8178	neuraminidase 1 (lysosomal sialidase)	NM_000434_3
423	NEU1	NM_000434_4	1	1	0	0	0	0	0	0	0	0	0	0	0	0	0	0	4758	chr6	31826829	31830709	2071	-	protein_coding	FLJ93471|NANH|NEU|SIAL1	P8178	neuraminidase 1 (lysosomal sialidase)	NM_000434_4
424	NEU1	NM_000434_5	1	1	0	0	0	0	0	0	0	0	0	0	0	0	0	0	4758	chr6	31826829	31830709	2071	-	protein_coding	FLJ93471|NANH|NEU|SIAL1	P8178	neuraminidase 1 (lysosomal sialidase)	NM_000434_5
425	NEU1	NM_000434_6	1	1	0	0	0	0	0	0	0	0	0	0	0	0	0	0	4758	chr6	31826829	31830709	2071	-	protein_coding	FLJ93471|NANH|NEU|SIAL1	P8178	neuraminidase 1 (lysosomal sialidase)	NM_000434_6
426	NEU1	NM_000434_7	1.03664	0.615167	5.07105	5.12297	5.23341	5.03138	4.93185	5.18905	5.07215	5.10518	36.7393	31.5455	29.5526	35.4278	32.4721	33.6661	4758	chr6	31826829	31830709	2071	-	protein_coding	FLJ93471|NANH|NEU|SIAL1	P8178	neuraminidase 1 (lysosomal sialidase)	NM_000434_7
427	NOTCH3	NM_000435	1.2348	0.00582185	5.28682	5.5911	5.36797	5.27584	5.21238	5.6568	5.57743	5.53645	40.4326	37.5523	36.1108	49.3782	46.5125	45.7437	4854	chr19	15270444	15311792	8071	-	protein_coding	CADASIL|CASIL	P3621	notch 3	NM_000435
428	OXCT1	NM_000436	0.868456	0.0755759	3.73854	3.53507	3.64175	3.68946	3.87387	3.57528	3.45562	3.57114	11.5202	11.843	13.6731	10.903	9.91683	10.9675	5019	chr5	41730167	41870791	3558	-	protein_coding	OXCT|SCOT	P19685	3-oxoacid CoA-transferase 1	NM_000436
429	PAFAH2	NM_000437	1.11397	0.177018	2.60489	2.7606	2.55859	2.62464	2.63035	2.91625	2.61797	2.73176	4.90854	5.14091	5.19691	6.53954	5.11141	5.68415	5051	chr1	26286258	26324648	3581	-	protein_coding	FLJ26025|HSD-PLA2	P17037	platelet activating factor acetylhydrolase 2	NM_000437
430	PAX3	NM_000438	1	1	0	0	0	0	0	0	0	0	0	0	0	0	0	0	5077	chr2	223064606	223163715	3789	-	protein_coding	CDHS|HUP2|MGC120381|MGC120382|MGC120383|MGC120384|MGC134778|WS1|WS3	P22381	paired box 3	NM_000438
431	PCSK1	NM_000439	1	1	0	0	0	0	0	0	0	0	0	0	0	0	0	0	5122	chr5	95726040	95768985	5243	-	protein_coding	BMIQ12|NEC1|PC1|PC3|SPC3	P8117	proprotein convertase subtilisin/kexin type 1	NM_000439
432	PDE6A	NM_000440	0.998079	0.937027	0.068149	0.0653755	0.0757147	0.10735	0.0200311	0.0468002	0.0417167	0.1067	0.0541996	0.0766581	0.0140218	0.0328666	0.0290025	0.0776374	5145	chr5	149237519	149324356	5642	-	protein_coding	CGPR-A|PDEA|RP43	P28136	phosphodiesterase 6A	NM_000440
433	SLC26A4	NM_000441	1.01564	0.269272	0.035912	0.0583045	0.0177252	0.0213408	0.0681204	0.0537333	0.071108	0.0499841	0.0124805	0.0147056	0.0484317	0.0378389	0.0500729	0.0357615	5172	chr7	107301080	107358252	4928	+	protein_coding	DFNB4|EVA|PDS|TDH2B	P17456	solute carrier family 26 member 4	NM_000441
434	PECAM1	NM_000442	0.977594	0.552718	0.0598616	0.0271686	0.151265	0.0236878	0	1.65534e-05	0.0530789	0.0279223	0.111023	0.0163479	0	0	0.0371098	0.0198858	5175	chr17	62396777	62407083	4453	-	protein_coding	CD31|FLJ58394|PECAM-1	P29187	platelet and endothelial cell adhesion molecule 1	NM_000442
435	ABCB4	NM_000443	0.927458	0.373911	0.108749	0.000103182	8.48033e-05	0.304206	0.000116238	0.00021401	7.23579e-05	2.31727e-05	9.24961e-05	0.233572	9.03287e-05	0.000132906	0	9.04058e-05	5244	chr7	87031361	87105019	3967	-	protein_coding	ABC21|GBD1|MDR2|MDR2/3|MDR3|PFIC-3|PGY3	P32530	ATP-binding cassette, sub-family B (MDR/TAP), member 4	NM_000443
436	PHEX	NM_000444	0.964249	0.355099	0.608434	0.555911	0.624284	0.664979	0.532885	0.536279	0.512675	0.616706	0.543466	0.58242	0.447348	0.449402	0.423929	0.537801	5251	chrX	22050562	22269427	6169	+	protein_coding	HPDR|HPDR1|HYP|HYP1|PEX|XLH	P19252	phosphate regulating endopeptidase homolog, X-linked	NM_000444
437	PLEC	NM_000445	1.01894	0.737376	5.56728	5.59435	5.62009	5.59699	5.48095	5.68703	5.47369	5.61424	48.3428	47.1682	43.7036	50.4439	43.2105	48.3361	5339	chr8	144989315	145050913	16463	-	protein_coding	EBS1|EBSO|HD1|PCN|PLEC1|PLEC1b|PLTN	P31423	plectin	NM_000445
438	PON1	NM_000446	1	1	0	0	0	0	0	0	0	0	0	0	0	0	0	0	5444	chr7	94927669	94953884	1752	-	protein_coding	ESA|MVCD5|PON	P21191	paraoxonase 1	NM_000446
439	PSEN2	NM_000447	1.01941	0.913993	2.84902	2.87675	2.49325	3.18411	2.78573	3.12086	2.74405	2.73038	4.64807	8.05216	5.90173	7.68827	5.6686	5.68007	5664	chr1	227058273	227083804	2397	+	protein_coding	AD3L|AD4|PS2|STM2	P4769	presenilin 2	NM_000447
440	RAG1	NM_000448	1.01181	0.489641	0.0379285	0.0548686	0.0648076	0.0314617	0.0171002	0.0201595	0.0702845	0.0735437	0.0462181	0.0217961	0.0119569	0.0140141	0.0494776	0.0529541	5896	chr11	36589563	36601310	6580	+	protein_coding	MGC43321|RNF74	P26935	recombination activating gene 1	NM_000448
441	RFX5	NM_000449	1.24224	0.393851	1.75712	2.07006	1.75198	1.98362	1.4945	1.92425	1.61991	2.51808	2.37693	2.94019	1.81986	2.79109	2.06096	4.75694	5993	chr1	151313116	151319769	3736	-	protein_coding	.	P36139	regulatory factor X5	NM_000449
442	SELE	NM_000450	1.05893	0.266152	0.218123	0.300726	0.173546	0.180789	0.296695	0.370428	0.203526	0.323137	0.128534	0.132431	0.228608	0.292235	0.15031	0.253306	6401	chr1	169691781	169703220	3875	-	protein_coding	CD62E|ELAM|ELAM1|ESEL|LECAM2	P15359	selectin E	NM_000450
443	SHOX	NM_000451	1	1	0	0	0	0	0	0	0	0	0	0	0	0	0	0	6473	chrX	585079	620146	4384	+	protein_coding	GCFX|PHOG|SHOXY|SS	P29507	short stature homeobox	NM_000451
444	SHOX	NM_000451_1	1	1	0	0	0	0	0	0	0	0	0	0	0	0	0	0	6473	chrX	585079	620146	4384	+	protein_coding	GCFX|PHOG|SHOXY|SS	P29507	short stature homeobox	NM_000451_1
445	SLC10A2	NM_000452	1	1	0	0	0	0	0	0	0	0	0	0	0	0	0	0	6555	chr13	103696348	103719196	3779	-	protein_coding	ASBT|IBAT|ISBT|NTCP2|PBAM	P19075	solute carrier family 10 member 2	NM_000452
446	SLC5A5	NM_000453	1.01918	0.45594	0.171496	0.198903	0.188118	0.142504	0.18343	0.145771	0.248824	0.200272	0.139952	0.102971	0.135773	0.106061	0.186995	0.150465	6528	chr19	17982782	18005983	3576	+	protein_coding	NIS|TDH1	P3898	solute carrier family 5 member 5	NM_000453
447	SOD1	NM_000454	0.836548	0.00629478	7.94184	7.68436	8.00872	7.89815	7.91619	7.63738	7.74968	7.66361	257.401	236.381	240.782	197.806	213.116	203.247	6647	chr21	33031935	33041243	965	+	protein_coding	ALS|ALS1|IPOA|SOD|homodimer	P16183	superoxide dismutase 1, soluble	NM_000454
448	STK11	NM_000455	0.976603	0.731157	5.24156	5.20741	5.37197	5.25743	5.08046	5.22426	5.13307	5.26187	40.5439	37.0679	32.8676	36.3271	33.9141	37.6429	6794	chr19	1205798	1228434	3276	+	protein_coding	LKB1|PJS	P10136	serine/threonine kinase 11	NM_000455
449	SUOX	NM_000456	0.811037	0.412573	1.84847	1.54631	1.16679	2.08577	2.10883	1.34642	1.42727	1.81962	1.25082	3.23081	3.31621	1.53994	1.67904	2.54823	6821	chr12	56391043	56399309	2462	+	protein_coding	.	P6087	sulfite oxidase	NM_000456
450	HNF4A	NM_000457	1.00002	0.404703	2.20193e-06	3.27053e-05	6.58472e-06	2.10589e-08	0	6.38372e-09	9.81073e-05	0	4.66685e-06	0	0	0	6.63236e-05	0	3172	chr20	42984441	43061485	5058	+	protein_coding	FLJ39654|HNF4|HNF4a7|HNF4a8|HNF4a9|HNF4alpha|MODY|MODY1|NR2A1|NR2A21|TCF|TCF14	P31209	hepatocyte nuclear factor 4 alpha	NM_000457
451	HNF1B	NM_000458	1	1	0	0	0	0	0	0	0	0	0	0	0	0	0	0	6928	chr17	36046434	36105069	2731	-	protein_coding	FJHN|HNF1beta|HNF2|HPC11|LF-B3|LFB3|MODY5|TCF2|VHNF1	P11498	HNF1 homeobox B	NM_000458
452	TEK	NM_000459	1	1	0	0	0	0	0	0	0	0	0	0	0	0	0	0	7010	chr9	27109139	27230176	4768	+	protein_coding	CD202B|TIE-2|TIE2|VMCM|VMCM1	P23395	TEK receptor tyrosine kinase	NM_000459
453	THPO	NM_000460	0.99998	0.612711	4.95358e-05	2.06685e-05	0	0.000148602	0	5.62461e-05	4.44764e-08	5.71426e-06	0	0.000100668	0	3.8685e-05	0	4.18624e-06	7066	chr3	184089723	184097476	1901	-	protein_coding	MGC163194|MGDF|MKCSF|ML|MPLLG|TPO	P20254	thrombopoietin	NM_000460
454	THRB	NM_000461	1.06302	0.795029	0.933247	1.02142	1.29865	0.359518	0.98966	1.20339	1.19515	0.582314	1.46437	0.280115	0.986741	1.30095	1.28334	0.502803	7068	chr3	24158645	24536313	7772	-	protein_coding	ERBA-BETA|ERBA2|GRTH|MGC126109|MGC126110|NR1A2|PRTH|THR1|THRB1|THRB2	P225	thyroid hormone receptor beta	NM_000461
455	UBE3A	NM_000462	0.894274	0.691646	0.633603	0.472392	1.09851	0.000817469	0.596839	0.000592588	0.596345	0.722406	1.14433	0	0.512957	0.000237476	0.508899	0.654766	7337	chr15	25582396	25684175	5276	-	protein_coding	ANCR|AS|E6-AP|EPVE6AP|FLJ26981|HPVE6A	P4582	ubiquitin protein ligase E3A	NM_000462
456	UGT1A1	NM_000463	0.906162	0.142806	0.223625	0.0814658	0.33924	0.20628	0.116619	0.124776	0.116283	0	0.266035	0.15269	0.0843316	0.0901113	0.0831885	0	54658	chr2	234668919	234669797	879	+	protein_coding	BILIQTL1|GNT1|HUG-BR1|UDPGT|UDPGT 1-1|UGT1|UGT1A	P6914	UDP glucuronosyltransferase family 1 member A1	NM_000463
457	BARD1	NM_000465	1.00634	0.959993	3.2659	3.27502	2.93769	3.40312	3.40824	3.44058	3.17926	3.18976	6.68644	9.53288	9.62555	9.84295	8.01549	8.18619	580	chr2	215590370	215674435	5506	-	protein_coding	.	P2222	BRCA1 associated RING domain 1	NM_000465
458	PEX1	NM_000466	1.23445	0.116277	2.35021	2.65408	2.39373	2.59124	2.00562	2.70503	2.61	2.64559	4.27014	5.00164	3.01918	5.51285	5.07914	5.29512	5189	chr7	92116337	92157845	4501	-	protein_coding	ZWS|ZWS1	P18250	peroxisomal biogenesis factor 1	NM_000466
459	TWIST1	NM_000474	1.04111	0.0602066	0.0228242	0.080945	0	0.0674169	0	0.0859833	0.0762793	0.0805559	0	0.047418	0	0.0612608	0.0538183	0.0581312	7291	chr7	19155091	19157295	1666	-	protein_coding	ACS3|BPES2|BPES3|CRS1|SCS|TWIST|bHLHa38	P2779	twist family bHLH transcription factor 1	NM_000474
460	NR0B1	NM_000475	1	1	0	0	0	0	0	0	0	0	0	0	0	0	0	0	190	chrX	30322539	30327495	1585	-	protein_coding	AHC|AHCH|AHX|DAX-1|DAX1|DSS|GTD|HHG|NROB1	P9076	nuclear receptor subfamily 0 group B member 1	NM_000475
461	AK1	NM_000476	1.05881	0.142506	3.55558	3.63803	3.56999	3.57573	3.52037	3.56872	3.63246	3.70945	10.9128	10.8689	10.4849	10.8492	11.343	12.1685	203	chr9	130628759	130640022	2266	-	protein_coding	.	P20264	adenylate kinase 1	NM_000476
462	ALB	NM_000477	1.01464	0.373851	4.32956e-06	0.0209675	0	1.29886e-05	0	0.0619968	1.35671e-05	0	0	0	0	0.0438012	0	0	213	chr4	74269972	74287129	2247	+	protein_coding	DKFZp779N1935|PRO0883|PRO0903|PRO1341	P32308	albumin	NM_000477
463	ALPL	NM_000478	1	1	0	0	0	0	0	0	0	0	0	0	0	0	0	0	249	chr1	21835858	21904905	2596	+	protein_coding	AP-TNAP|APTNAP|FLJ40094|FLJ93059|HOPS|MGC161443|MGC167935|TNAP|TNSALP	P23651	alkaline phosphatase, liver/bone/kidney	NM_000478
464	AMH	NM_000479	1.04494	0.286448	2.99345	3.05687	2.91778	3.0467	3.01279	3.07257	2.98864	3.10686	6.57961	7.22718	7.07812	7.40164	6.90071	7.67033	268	chr19	2249113	2252072	2018	+	protein_coding	MIF|MIS	P23410	anti-Mullerian hormone	NM_000479
465	AMPD3	NM_000480	0.922515	0.473748	0.25085	0.134494	0.450732	0.000254603	0.266413	9.239e-05	0.196151	0.198395	0.367922	0	0.203058	1.04506e-05	0.144553	0.14898	272	chr11	10471868	10529126	5659	+	protein_coding	.	P1116	adenosine monophosphate deaminase 3	NM_000480
466	AMT	NM_000481	0.999963	0.992694	0.00391472	0.00386126	0	4.79737e-06	0.0117077	0.0115479	5.01101e-06	0	0	0	0.00816754	0.00800674	0	0	275	chr3	49454211	49460111	1941	-	protein_coding	GCE|GCST|GCVT|NKH	P8818	aminomethyltransferase	NM_000481
467	APOA4	NM_000482	1	1	0	0	0	0	0	0	0	0	0	0	0	0	0	0	337	chr11	116691418	116694011	1460	-	protein_coding	MGC142154|MGC142156	P26722	apolipoprotein A4	NM_000482
468	APOC2	NM_000483	1	1	0	0	0	0	0	0	0	0	0	0	0	0	0	0	344	chr19	45449239	45452822	729	+	protein_coding	MGC75082	P33726	apolipoprotein C2	NM_000483
469	APP	NM_000484	1.02501	0.795445	4.74336	4.779	4.71716	4.96251	4.51558	4.76315	4.77501	4.79863	25.388	30.0345	21.895	26.1159	26.2432	27.0277	351	chr21	27252861	27543446	4015	-	protein_coding	AAA|ABETA|ABPP|AD1|APPI|CTFgamma|CVAP|PN2	P23283	amyloid beta precursor protein	NM_000484
470	APRT	NM_000485	0.8239	0.204957	7.67985	7.40039	7.9533	7.59193	7.44609	7.23724	7.45608	7.49471	247.657	190.985	173.547	149.651	173.69	180.678	353	chr16	88875877	88878342	673	-	protein_coding	AMP|DKFZp686D13177|MGC125856|MGC125857|MGC129961	P23513	adenine phosphoribosyltransferase	NM_000485
471	AQP2	NM_000486	1.01366	0.116315	4.062e-06	0.0195814	0	1.2186e-05	0	3.69401e-06	0.0286316	0.0299112	0	0	0	0	0.0198325	0.021261	359	chr12	50344524	50352664	4179	+	protein_coding	AQP-CD|MGC34501|WCH-CD	P21290	aquaporin 2	NM_000486
472	ARSA	NM_000487	0.95206	0.178429	1.53774	1.46687	1.4547	1.58938	1.56559	1.44566	1.48583	1.46883	1.74721	1.99926	1.9619	1.7211	1.791	1.7818	410	chr22	51061182	51066601	4621	-	protein_coding	MLD	P2730	arylsulfatase A	NM_000487
473	SERPINC1	NM_000488	0.953298	0.000184163	0.0690206	1.95562e-05	0.0595639	0.0705334	0.0769111	1.31965e-05	4.54717e-05	0	0.0424007	0.0496883	0.0548435	0	0	0	462	chr1	173872942	173886516	1599	-	protein_coding	AT3|ATIII|MGC22579	P7482	serpin family C member 1	NM_000488
474	ATRX	NM_000489	1.28452	0.0621113	3.28014	3.64137	2.95754	3.40112	3.43447	3.69203	3.53239	3.69381	6.79415	9.51588	9.82092	11.9074	10.5165	12.0242	546	chrX	76760356	77041755	11220	-	protein_coding	ATR2|MGC2094|MRXHF1|RAD54|RAD54L|SFM1|SHS|XH2|XNP|ZNF-HX	P31124	alpha thalassemia/mental retardation syndrome X-linked	NM_000489
475	AVP	NM_000490	1.06303	0.373949	1.85688e-05	0.0882065	0	5.57057e-05	0	1.68865e-05	0.249909	0	0	0	0	0	0.188081	0	551	chr20	3063202	3065370	619	-	protein_coding	ADH|ARVP|AVP-NPII|AVRP|VP	P17214	arginine vasopressin	NM_000490
476	C1QB	NM_000491	1	1	0	0	0	0	0	0	0	0	0	0	0	0	0	0	713	chr1	22979682	22988029	1044	+	protein_coding	.	P30942	complement component 1, q subcomponent, B chain	NM_000491
477	CFTR	NM_000492	1	1	0	0	0	0	0	0	0	0	0	0	0	0	0	0	1080	chr7	117120017	117308718	6131	+	protein_coding	ABC35|ABCC7|CF|CFTR/MRP|MRP7|TNR-CFTR|dJ760C5.1	P16352	cystic fibrosis transmembrane conductance regulator (ATP-binding cassette sub-family C, member 7)	NM_000492
478	COL10A1	NM_000493	1.05476	0.551729	0.108901	0.185815	0.0270116	0.0950898	0.19936	0.120549	0.0369338	0.377732	0.0191187	0.0674999	0.148382	0.0869281	0.0255375	0.301526	1300	chr6	116440085	116447296	3290	-	protein_coding	.	P11567	collagen type X alpha 1	NM_000493
479	COL17A1	NM_000494	1.02314	0.406329	0.136905	0.16991	0.134365	0.159027	0.117015	0.22111	0.179202	0.107123	0.0981374	0.115667	0.0846292	0.165307	0.131283	0.078098	1308	chr10	105791046	105845638	5610	-	protein_coding	BA16H23.2|BP180|BPAG2|FLJ60881|KIAA0204|LAD-1	P31317	collagen type XVII alpha 1	NM_000494
480	COL4A5	NM_000495	1.25042	0.00107868	3.58421	3.90663	3.61438	3.58402	3.55359	3.96759	3.87104	3.87926	11.2861	10.9354	10.7528	14.6235	13.563	13.8141	1287	chrX	107683074	107940775	6644	+	protein_coding	ASLN|ATS|CA54|MGC167109|MGC42377	P25437	collagen type IV alpha 5	NM_000495
481	CRYBB2	NM_000496	1.25654	0.0114407	7.57109e-05	0.329527	0	0.000227121	0	0.40328	0.190433	0.38536	0	0	0	0.322024	0.140067	0.308505	1415	chr22	25615612	25627836	763	+	protein_coding	CCA2|CRYB2|CRYB2A|D22S665	P24476	crystallin beta B2	NM_000496
482	CYP11B1	NM_000497	1	1	0	0	0	0	0	0	0	0	0	0	0	0	0	0	1584	chr8	143953773	143961236	3535	-	protein_coding	CPN1|CYP11B|DKFZp686B05283|FHI|FLJ36771|P450C11	P7632	cytochrome P450 family 11 subfamily B member 1	NM_000497
483	CYP11B2	NM_000498	1	1	0	0	0	0	0	0	0	0	0	0	0	0	0	0	1585	chr8	143991975	143999259	2936	-	protein_coding	ALDOS|CPN2|CYP11B|CYP11BL|P-450C18|P450C18|P450aldo	P29622	cytochrome P450 family 11 subfamily B member 2	NM_000498
484	CYP1A1	NM_000499	0.188746	0.00735023	4.21834	1.81286	4.517	4.32529	3.68939	2.1109	1.75787	1.50514	21.954	18.9685	11.9117	3.31183	2.35936	1.86718	1543	chr15	75011883	75017877	2608	-	protein_coding	AHH|AHRR|CP11|CYP1|P1-450|P450-C|P450DX	P3223	cytochrome P450 family 1 subfamily A member 1	NM_000499
485	CYP21A2	NM_000500	1	1	0	0	0	0	0	0	0	0	0	0	0	0	0	0	1589	chr6	31973359	32009447	3452	+	protein_coding	CA21H|CAH1|CPS1|CYP21|CYP21B|MGC150536|MGC150537|P450c21B	P6842	cytochrome P450 family 21 subfamily A member 2	NM_000500
486	CYP21A2	NM_000500_1	1	1	0	0	0	0	0	0	0	0	0	0	0	0	0	0	1589	chr6	31973359	32009447	3452	+	protein_coding	CA21H|CAH1|CPS1|CYP21|CYP21B|MGC150536|MGC150537|P450c21B	P6842	cytochrome P450 family 21 subfamily A member 2	NM_000500_1
487	CYP21A2	NM_000500_2	1	1	0	0	0	0	0	0	0	0	0	0	0	0	0	0	1589	chr6	31973359	32009447	3452	+	protein_coding	CA21H|CAH1|CPS1|CYP21|CYP21B|MGC150536|MGC150537|P450c21B	P6842	cytochrome P450 family 21 subfamily A member 2	NM_000500_2
488	CYP21A2	NM_000500_3	1	1	0	0	0	0	0	0	0	0	0	0	0	0	0	0	1589	chr6	31973359	32009447	3452	+	protein_coding	CA21H|CAH1|CPS1|CYP21|CYP21B|MGC150536|MGC150537|P450c21B	P6842	cytochrome P450 family 21 subfamily A member 2	NM_000500_3
489	CYP21A2	NM_000500_4	1	1	0	0	0	0	0	0	0	0	0	0	0	0	0	0	1589	chr6	31973359	32009447	3452	+	protein_coding	CA21H|CAH1|CPS1|CYP21|CYP21B|MGC150536|MGC150537|P450c21B	P6842	cytochrome P450 family 21 subfamily A member 2	NM_000500_4
490	CYP21A2	NM_000500_5	1.00001	0.942378	0.000168043	0.000177439	0.000246861	2.12457e-07	0.000257041	0.000267412	0.000264889	0	0.00017367	0	0.000178945	0.000184148	0.000179442	0	1589	chr6	31973359	32009447	3452	+	protein_coding	CA21H|CAH1|CPS1|CYP21|CYP21B|MGC150536|MGC150537|P450c21B	P6842	cytochrome P450 family 21 subfamily A member 2	NM_000500_5
491	CYP21A2	NM_000500_6	1	1	0	0	0	0	0	0	0	0	0	0	0	0	0	0	1589	chr6	31973359	32009447	3452	+	protein_coding	CA21H|CAH1|CPS1|CYP21|CYP21B|MGC150536|MGC150537|P450c21B	P6842	cytochrome P450 family 21 subfamily A member 2	NM_000500_6
492	CYP21A2	NM_000500_7	1	1	0	0	0	0	0	0	0	0	0	0	0	0	0	0	1589	chr6	31973359	32009447	3452	+	protein_coding	CA21H|CAH1|CPS1|CYP21|CYP21B|MGC150536|MGC150537|P450c21B	P6842	cytochrome P450 family 21 subfamily A member 2	NM_000500_7
493	CYP21A2	NM_000500_8	1	1	0	0	0	0	0	0	0	0	0	0	0	0	0	0	1589	chr6	31973359	32009447	3452	+	protein_coding	CA21H|CAH1|CPS1|CYP21|CYP21B|MGC150536|MGC150537|P450c21B	P6842	cytochrome P450 family 21 subfamily A member 2	NM_000500_8
494	CYP21A2	NM_000500_9	1	1	0	0	0	0	0	0	0	0	0	0	0	0	0	0	1589	chr6	31973359	32009447	3452	+	protein_coding	CA21H|CAH1|CPS1|CYP21|CYP21B|MGC150536|MGC150537|P450c21B	P6842	cytochrome P450 family 21 subfamily A member 2	NM_000500_9
495	ELN	NM_000501	1	1	0	0	0	0	0	0	0	0	0	0	0	0	0	0	2006	chr7	73442119	73484236	4035	+	protein_coding	FLJ38671|FLJ43523|SVAS|WBS|WS	P21337	elastin	NM_000501
496	EPX	NM_000502	1.02318	0.0827923	0.0145233	0.0475795	0	3.88242e-05	0.0431007	0.0505982	0.044976	0.0471587	0	0	0.0303832	0.0355947	0.03135	0.0336939	8288	chr17	56270089	56282535	2717	+	protein_coding	EPO|EPP|EPX-PEN	P23828	eosinophil peroxidase	NM_000502
497	EYA1	NM_000503	0.999935	0.373887	9.42617e-05	2.64867e-08	0.000282708	5.8961e-08	0	1.78732e-08	6.15868e-08	0	0.00019876	0	0	0	0	0	2138	chr8	72109668	72274467	4244	-	protein_coding	BOP|BOR|MGC141875	P34925	EYA transcriptional coactivator and phosphatase 1	NM_000503
498	F10	NM_000504	0.974043	0.542086	0.156713	0.118771	0.235031	0.0739114	0.156701	0.182437	0.0835938	0.0881074	0.177663	0.0520307	0.114899	0.134519	0.0590533	0.0638602	2159	chr13	113777113	113803843	1536	+	protein_coding	FX|FXA	P34530	coagulation factor X	NM_000504
499	F12	NM_000505	1.10105	0.191126	2.30097	2.43985	2.38079	2.38615	2.12031	2.42438	2.5033	2.38951	4.22246	4.20643	3.35148	4.36144	4.64636	4.27138	2161	chr5	176829139	176836577	2051	-	protein_coding	HAE3|HAEX|HAF	P36126	coagulation factor XII	NM_000505
500	F2	NM_000506	1.00253	0.904907	0.0185129	0.0221593	0	0.054841	0	7.67283e-06	2.64386e-05	0.0654497	0	0.038408	0	0	0	0.046979	2147	chr11	46740743	46761056	2010	+	protein_coding	PT	P7556	coagulation factor II, thrombin	NM_000506
501	FBP1	NM_000507	1.05019	0.258452	6.97473	7.04538	7.05756	6.96254	6.8997	6.99471	7.09367	7.04606	132.649	123.108	118.518	126.342	134.891	132.115	2203	chr9	97365421	97402531	1489	-	protein_coding	FBP	P34097	fructose-bisphosphatase 1	NM_000507
502	FGA	NM_000508	1	1	0	0	0	0	0	0	0	0	0	0	0	0	0	0	2243	chr4	155504280	155511897	5297	-	protein_coding	Fib2|MGC119422|MGC119423|MGC119425	P14164	fibrinogen alpha chain	NM_000508
503	FGG	NM_000509	1.01919	0.37381	5.75263e-06	0.0274243	0	1.72578e-05	0	5.23148e-06	1.80264e-05	0.080735	0	0	0	0	0	0.0582054	2266	chr4	155525286	155533902	2152	-	protein_coding	.	P546	fibrinogen gamma chain	NM_000509
504	FSHB	NM_000510	1	1	0	0	0	0	0	0	0	0	0	0	0	0	0	0	2488	chr11	30252563	30256824	1906	+	protein_coding	.	P6354	follicle stimulating hormone beta subunit	NM_000510
505	FUT2	NM_000511	0.999923	0.852249	0.0333817	0.0332707	0.0329302	0.033443	0.0337719	0.0339577	0.0335625	0.0322913	0.0232541	0.0232028	0.0237339	0.0237406	0.0232759	0.0229974	2524	chr19	49199228	49209191	3089	+	protein_coding	B12QTL1|SE|SEC2|Se2|sej	P4326	fucosyltransferase 2	NM_000511
506	GALNS	NM_000512	1.07201	0.0803978	4.26522	4.36555	4.29016	4.27649	4.22829	4.43756	4.31359	4.34255	18.6267	18.2882	17.7605	20.6386	18.7871	19.4296	2588	chr16	88880142	88923374	2363	-	protein_coding	FLJ17434|FLJ42844|FLJ98217|GALNAC6S|GAS|MPS4A	P15894	galactosamine (N-acetyl)-6-sulfatase	NM_000512
507	OPN1MW	NM_000513	1	1	0	0	0	0	0	0	0	0	0	0	0	0	0	0	2652	chrX	153448085	153448278	194	+	protein_coding	CBBM|CBD|COD5|GCP|GOP|MGC176615|MGC177321|MGC198468|MGC198469|OPN1MW1|OPN1MW2	P1875	opsin 1 (cone pigments), medium-wave-sensitive	NM_000513
508	OPN1MW	NM_000513_1	1	1	0	0	0	0	0	0	0	0	0	0	0	0	0	0	2652	chrX	153448085	153448278	194	+	protein_coding	CBBM|CBD|COD5|GCP|GOP|MGC176615|MGC177321|MGC198468|MGC198469|OPN1MW1|OPN1MW2	P1875	opsin 1 (cone pigments), medium-wave-sensitive	NM_000513_1
509	GDNF	NM_000514	0.971008	0.374046	0.0424596	1.45974e-05	0	0.123804	0	1.55158e-05	2.82763e-05	0	0	0.0890062	0	5.16354e-06	4.77804e-07	0	2668	chr5	37812779	37839782	4280	-	protein_coding	ATF1|ATF2|HFB1-GDNF	P5113	glial cell derived neurotrophic factor	NM_000514
510	GH1	NM_000515	1	1	0	0	0	0	0	0	0	0	0	0	0	0	0	0	2688	chr17	61994553	61996212	801	-	protein_coding	GH|GH-N|GHN|IGHD1B|hGH-N	P5261	growth hormone 1	NM_000515
511	GNAS	NM_000516	1.03981	0.403073	8.3796	8.43592	8.36674	8.41719	8.3541	8.53178	8.3375	8.43196	330.191	339.163	326.53	368.551	320.809	346.889	2778	chr20	57414773	57486247	7216	+	protein_coding	AHO|C20orf45|GNAS1|GPSA|GSA|GSP|MGC33735|NESP|PHP1A|PHP1B|PHP1C|POH	P11037	GNAS complex locus	NM_000516
512	HBA2	NM_000517	1	1	0	0	0	0	0	0	0	0	0	0	0	0	0	0	3040	chr16	222846	223709	605	+	protein_coding	.	P32794	hemoglobin subunit alpha 2	NM_000517
513	HBB	NM_000518	1	1	0	0	0	0	0	0	0	0	0	0	0	0	0	0	3043	chr11	5246696	5248301	626	-	protein_coding	CD113t-C|beta-globin	P13433	hemoglobin subunit beta	NM_000518
514	HBD	NM_000519	1	1	0	0	0	0	0	0	0	0	0	0	0	0	0	0	3045	chr11	5254059	5255858	774	-	protein_coding	.	P18791	hemoglobin subunit delta	NM_000519
515	HEXA	NM_000520	0.918178	0.0388201	6.1342	6.01104	6.17946	6.15838	6.06206	6.02599	5.97681	6.02972	71.7132	70.0809	65.8765	64.0669	61.6576	64.8072	3073	chr15	72635778	72668520	2437	-	protein_coding	MGC99608|TSD	P32281	hexosaminidase subunit alpha	NM_000520
516	HEXB	NM_000521	0.947119	0.293899	5.73865	5.66027	5.76764	5.8187	5.62251	5.61907	5.71016	5.65009	53.6564	55.1715	48.3126	48.0755	51.0871	49.5806	3074	chr5	73935848	74017113	2437	+	protein_coding	ENC-1AS	P16968	hexosaminidase subunit beta	NM_000521
517	HOXA13	NM_000522	1.26073	0.0677242	0.683979	1.01824	0.593423	0.860475	0.580373	1.18889	0.970747	0.877138	0.511181	0.811189	0.495909	1.27805	0.954792	0.843444	3209	chr7	27236499	27239725	2514	-	protein_coding	HOX1|HOX1J	P29996	homeobox A13	NM_000522
518	HOXD13	NM_000523	1	1	0	0	0	0	0	0	0	0	0	0	0	0	0	0	3239	chr2	176957532	176960666	2327	+	protein_coding	BDE|BDSD|HOX4I|SPD	P31830	homeobox D13	NM_000523
519	HTR1A	NM_000524	1	1	0	0	0	0	0	0	0	0	0	0	0	0	0	0	3350	chr5	63255875	63258119	2245	-	protein_coding	5-HT1A|5HT1a|ADRB2RL1|ADRBRL1	P29600	5-hydroxytryptamine receptor 1A	NM_000524
520	KCNJ11	NM_000525	0.997341	0.946564	1.60583	1.60198	1.66178	1.61606	1.53688	1.6101	1.66513	1.52739	2.17137	2.05481	1.90363	2.04955	2.1601	1.8976	3767	chr11	17406796	17410878	2756	-	protein_coding	BIR|HHF2|IKATP|KIR6.2|MGC133230|PHHI|TNDM3	P19639	potassium voltage-gated channel subfamily J member 11	NM_000525
521	KRT14	NM_000526	0.986496	0.373887	0.019621	5.50175e-06	0.0580683	1.22472e-05	0	3.71258e-06	1.27927e-05	0	0.0413002	0	0	0	0	0	3861	chr17	39738531	39743147	1636	-	protein_coding	CK14|EBS3|EBS4|K14|NFJ	P23387	keratin 14	NM_000526
522	LDLR	NM_000527	1.16573	0.0354541	4.56525	4.78648	4.59071	4.50387	4.59923	4.89532	4.76662	4.68999	23.174	21.5778	23.2613	28.7187	26.0868	24.995	3949	chr19	11200038	11244505	7826	+	protein_coding	FH|FHC|LDLCQ2	P619	low density lipoprotein receptor	NM_000527
523	MAN2B1	NM_000528	1.16217	0.164539	3.79287	4.0097	3.85111	3.92906	3.57496	3.84813	4.10711	4.06085	13.4766	14.1621	10.9285	13.3809	16.1526	15.8014	4125	chr19	12757322	12777591	3221	-	protein_coding	LAMAN|MANB	P8240	mannosidase alpha class 2B member 1	NM_000528
524	MC2R	NM_000529	0.978624	0.172571	0.0499358	0.0187617	0.0430516	0.0804702	0.0257422	1.30063e-05	0.0272381	0.0288525	0.0304908	0.0569071	0.0180442	0	0.018832	0.0205378	4158	chr18	13882043	13915706	3730	-	protein_coding	ACTHR|MGC125798	P32976	melanocortin 2 receptor	NM_000529
525	MPZ	NM_000530	1.023	0.659606	0.0349242	0.0677235	0.0475707	0.0565638	0	1.96354e-05	6.76581e-05	0.194244	0.0337485	0.0396114	0	0	0	0.145397	4359	chr1	161274525	161279762	1955	-	protein_coding	CHM|CMT1|CMT1B|CMT2I|CMT2J|CMT4E|CMTDI3|DSS|HMSNIB|MPP|P0	P17819	myelin protein zero	NM_000530
526	OTC	NM_000531	1	1	0	0	0	0	0	0	0	0	0	0	0	0	0	0	5009	chrX	38211736	38280703	1647	+	protein_coding	MGC129967|MGC129968|MGC138856|OCTD	P6527	ornithine carbamoyltransferase	NM_000531
527	PCCB	NM_000532	0.902824	0.0130287	5.9353	5.78782	5.98561	5.93692	5.8815	5.77592	5.77005	5.81704	62.57	59.9667	58.0091	53.7117	53.292	55.7864	5096	chr3	135969167	136049013	1876	+	protein_coding	DKFZp451E113	P14876	propionyl-CoA carboxylase beta subunit	NM_000532
528	PLP1	NM_000533	1	0.634507	3.23033e-07	7.35723e-07	9.68456e-07	6.42012e-10	0	1.94617e-10	2.20697e-06	0	6.87354e-07	0	0	0	1.47689e-06	0	5354	chrX	103031434	103047547	3264	+	protein_coding	HLD1|MMPL|PLP|PLP/DM20|PMD|SPG2	P10979	proteolipid protein 1	NM_000533
529	PMS1	NM_000534	0.832966	0.206309	2.8813	2.61763	2.81387	2.83205	2.9913	2.92485	2.32731	2.53596	6.05167	6.09094	6.95822	6.58443	3.99437	4.83811	5378	chr2	190648811	190742355	3364	+	protein_coding	DKFZp781M0253|FLJ98259|HNPCC3|PMSL1|hPMS1	.	PMS1 homolog 1, mismatch repair system component	NM_000534
530	PMS2	NM_000535	1.06183	0.616901	2.91255	2.9991	2.91878	3.10942	2.67717	2.7888	3.04328	3.14256	6.58441	7.59395	5.40174	5.90112	7.20685	7.88606	5395	chr7	6012870	6048737	2831	-	protein_coding	HNPCC4|PMS2CL|PMSL2	P8593	PMS1 homolog 2, mismatch repair system component	NM_000535
531	RAG2	NM_000536	0.989631	0.374019	0.015041	4.15151e-06	0	0.0446605	0	2.80144e-06	9.65309e-06	0	0	0.0311616	0	0	0	0	5897	chr11	36613493	36619829	2626	-	protein_coding	RAG-2	P34292	recombination activating gene 2	NM_000536
532	REN	NM_000537	0.975768	0.786111	0.180516	0.145126	0.0656738	0.151538	0.313292	6.40555e-05	0.322964	0.0929363	0.0469293	0.1099	0.242802	0	0.249466	0.067493	5972	chr1	204123944	204135465	1465	-	protein_coding	FLJ10761|HNFJ2	P13192	renin	NM_000537
533	RFXAP	NM_000538	0.939264	0.0752125	1.68059	1.59019	1.62621	1.71767	1.6963	1.5765	1.55319	1.63949	2.09426	2.27772	2.24288	1.97928	1.92387	2.13171	5994	chr13	37393339	37403740	2825	+	protein_coding	.	P30099	regulatory factor X associated protein	NM_000538
534	RHO	NM_000539	1.00306	0.896586	0.0250783	0.0294908	0.0326082	3.38602e-05	0.0422543	1.02643e-05	0.0867135	0	0.0230208	0	0.0297774	0	0.0614551	0	6010	chr3	129247482	129254187	2768	+	protein_coding	CSNBAD1|MGC138309|MGC138311|OPN2|RP4	P22545	rhodopsin	NM_000539
535	RYR1	NM_000540	0.99952	0.926954	0.0153639	0.0146712	0.0192744	0.0231478	0.0035953	0.0210981	0.0150856	0.00779913	0.0135547	0.0159965	0.00250483	0.0146811	0.010375	0.00554321	6261	chr19	38924340	39078204	15391	+	protein_coding	CCO|MHS|MHS1|RYDR|RYR|SKRR	P28120	ryanodine receptor 1	NM_000540
536	SAG	NM_000541	1	1	0	0	0	0	0	0	0	0	0	0	0	0	0	0	6295	chr2	234216309	234255701	1749	+	protein_coding	DKFZp686D1084|DKFZp686I1383|RP47|S-AG	P9344	S-antigen	NM_000541
537	SFTPB	NM_000542	1.03759	0.315562	0.024249	0.0774808	0.0714964	6.42668e-05	0	2.28461e-05	0.0960289	0.133141	0.0511005	0	2.61657e-06	2.30945e-06	0.0682718	0.0976645	6439	chr2	85884440	85895864	2840	-	protein_coding	PSP-B|SFTB3|SFTP3|SMDP1|SP-B	P31847	surfactant protein B	NM_000542
538	SMPD1	NM_000543	0.809426	0.214143	2.14904	1.84401	2.17095	2.27572	1.98563	1.3656	1.9881	2.07935	3.51442	3.82481	2.96331	1.57356	2.95134	3.24984	6609	chr11	6411644	6416228	3242	+	protein_coding	ASM|ASMASE|NPD	P5100	sphingomyelin phosphodiesterase 1	NM_000543
539	TAP2	NM_000544	1	1	0	0	0	0	0	0	0	0	0	0	0	0	0	0	6891	chr6	32789610	32806547	6165	-	protein_coding	ABC18|ABCB3|APT2|D6S217E|PSF2|RING11	P14428	transporter 2, ATP-binding cassette, sub-family B (MDR/TAP)	NM_000544
540	TAP2	NM_000544_1	1.03596	0.380329	0.000938274	0.0519009	0.00189127	0.000291901	0.000631162	0.000315572	0.150132	0	0.00134166	0.000175729	0.000443662	0.00021051	0.10895	0	6891	chr6	32789610	32806547	6165	-	protein_coding	ABC18|ABCB3|APT2|D6S217E|PSF2|RING11	P14428	transporter 2, ATP-binding cassette, sub-family B (MDR/TAP)	NM_000544_1
541	TAP2	NM_000544_2	1	1	0	0	0	0	0	0	0	0	0	0	0	0	0	0	6891	chr6	32789610	32806547	6165	-	protein_coding	ABC18|ABCB3|APT2|D6S217E|PSF2|RING11	P14428	transporter 2, ATP-binding cassette, sub-family B (MDR/TAP)	NM_000544_2
542	TAP2	NM_000544_3	1	1	0	0	0	0	0	0	0	0	0	0	0	0	0	0	6891	chr6	32789610	32806547	6165	-	protein_coding	ABC18|ABCB3|APT2|D6S217E|PSF2|RING11	P14428	transporter 2, ATP-binding cassette, sub-family B (MDR/TAP)	NM_000544_3
543	TAP2	NM_000544_4	1	1	0	0	0	0	0	0	0	0	0	0	0	0	0	0	6891	chr6	32789610	32806547	6165	-	protein_coding	ABC18|ABCB3|APT2|D6S217E|PSF2|RING11	P14428	transporter 2, ATP-binding cassette, sub-family B (MDR/TAP)	NM_000544_4
544	TAP2	NM_000544_5	1	1	0	0	0	0	0	0	0	0	0	0	0	0	0	0	6891	chr6	32789610	32806547	6165	-	protein_coding	ABC18|ABCB3|APT2|D6S217E|PSF2|RING11	P14428	transporter 2, ATP-binding cassette, sub-family B (MDR/TAP)	NM_000544_5
545	TAP2	NM_000544_6	1	1	0	0	0	0	0	0	0	0	0	0	0	0	0	0	6891	chr6	32789610	32806547	6165	-	protein_coding	ABC18|ABCB3|APT2|D6S217E|PSF2|RING11	P14428	transporter 2, ATP-binding cassette, sub-family B (MDR/TAP)	NM_000544_6
546	TAP2	NM_000544_7	1	1	0	0	0	0	0	0	0	0	0	0	0	0	0	0	6891	chr6	32789610	32806547	6165	-	protein_coding	ABC18|ABCB3|APT2|D6S217E|PSF2|RING11	P14428	transporter 2, ATP-binding cassette, sub-family B (MDR/TAP)	NM_000544_7
547	HNF1A	NM_000545	0.936872	0.470372	0.290375	0.196299	0.385128	0.142044	0.332773	0.181175	0.0313821	0.357797	0.3071	0.102549	0.259728	0.133487	0.0215259	0.283838	6927	chr12	121416371	121440314	3582	+	protein_coding	HNF-1A|HNF1|IDDM20|LFB1|MODY3|TCF-1|TCF1	P2631	HNF1 homeobox A	NM_000545
548	TPO	NM_000547	1	1	0	0	0	0	0	0	0	0	0	0	0	0	0	0	7173	chr2	1417233	1546499	3141	+	protein_coding	MSA|TDH2A|TPX	P10249	thyroid peroxidase	NM_000547
549	TSC2	NM_000548	0.604077	0.0301279	1.17662	0.449421	1.25137	0.94369	1.30875	0.793497	0.0014526	0.445936	1.38466	0.918698	1.47846	0.731996	0	0.366626	7249	chr16	2097990	2138713	5794	+	protein_coding	FLJ43106|LAM|TSC4	P12506	tuberous sclerosis 2	NM_000548
550	TSHB	NM_000549	1	1	0	0	0	0	0	0	0	0	0	0	0	0	0	0	7252	chr1	115572445	115576930	901	+	protein_coding	TSH-BETA	P11731	thyroid stimulating hormone beta	NM_000549
551	TYRP1	NM_000550	0.966886	0.293907	0.15177	0.103189	0.121513	0.177341	0.155908	0.0937353	0.0424889	0.170458	0.0883522	0.129902	0.114284	0.0669461	0.0294876	0.126717	7306	chr9	12693386	12710266	2876	+	protein_coding	CAS2|CATB|GP75|TRP|TYRP|b-PROTEIN	P8000	tyrosinase related protein 1	NM_000550
552	VHL	NM_000551	1.03423	0.250124	5.6122	5.66076	5.58943	5.57384	5.67142	5.69968	5.63914	5.64266	47.3067	46.3997	50.0125	50.8969	48.5851	49.3186	7428	chr3	10183319	10195354	4560	+	protein_coding	HRCA1|RCA1|VHL1	P20029	von Hippel-Lindau tumor suppressor	NM_000551
553	VWF	NM_000552	0.999693	0.983867	0.113094	0.112652	0.0947549	0.134068	0.110187	0.101192	0.0902995	0.145861	0.0682835	0.0966489	0.0794948	0.0724721	0.0639903	0.107545	7450	chr12	6058040	6233836	8833	-	protein_coding	F8VWF|VWD	P33490	von Willebrand factor	NM_000552
554	WRN	NM_000553	1.08298	0.31178	1.89134	2.00634	1.92132	1.86158	1.8905	1.92369	1.89465	2.18289	2.79734	2.62019	2.71039	2.78957	2.70358	3.56509	7486	chr8	30890778	31031277	5746	+	protein_coding	DKFZp686C2056|RECQ3|RECQL2|RECQL3	P32188	Werner syndrome RecQ like helicase	NM_000553
555	CRX	NM_000554	0.918159	0.169351	0.361448	0.238264	0.366693	0.354721	0.362904	0.116578	0.376051	0.210105	0.290544	0.277067	0.286343	0.0838898	0.295974	0.158599	1406	chr19	48325099	48346586	4466	+	protein_coding	CORD2|CRD|LCA7|OTX3	P12244	cone-rod homeobox	NM_000554
556	DCX	NM_000555	1	0.487101	1.77543e-06	8.14904e-06	0	6.32896e-09	5.31997e-06	1.91853e-09	6.61081e-09	2.44385e-05	0	0	3.71043e-06	0	0	1.76247e-05	1641	chrX	110537007	110655460	9959	-	protein_coding	DBCN|DC|FLJ51296|LISX|SCLH|XLIS	P26657	doublecortin	NM_000555
557	GDF5	NM_000557	0.97664	0.373888	0.0341105	9.5704e-06	0	2.13042e-05	0.0999834	6.4581e-06	2.2253e-05	0	0	0	0.0718607	0	0	0	8200	chr20	34021145	34025970	2330	-	protein_coding	BMP14|CDMP1|LAP4|OS5|SYNS2	P3276	growth differentiation factor 5	NM_000557
558	HBA1	NM_000558	0.811337	0.32188	1.58817	1.28655	1.31116	1.69306	1.72475	1.48447	0.666937	1.55211	1.48696	2.22312	2.30727	1.79538	0.582221	1.9466	3039	chr16	226650	227521	606	+	protein_coding	CD31|MGC126895|MGC126897	P18961	hemoglobin subunit alpha 1	NM_000558
559	HBG1	NM_000559	1	1	0	0	0	0	0	0	0	0	0	0	0	0	0	0	3047	chr11	5269502	5271087	584	-	protein_coding	HBGA|HBGR|HSGGL1	P5992	hemoglobin subunit gamma 1	NM_000559
560	CD53	NM_000560	1.01881	0.728459	0.0460762	0.0729552	0.061229	0.0368134	0.0400643	0.208584	7.81279e-05	0	0.0436254	0.0255552	0.0282194	0.155278	0	0	963	chr1	111413821	111442558	1721	+	protein_coding	MOX44|TSPAN25	P8205	CD53 molecule	NM_000560
561	GSTM1	NM_000561	0.497591	0.00659385	3.69177	2.6848	3.92451	3.64099	3.47336	2.83524	2.64122	2.56425	14.2249	11.4232	10.116	6.12611	5.20564	4.95978	2944	chr1	110230418	110236367	1185	+	protein_coding	GST1|GSTM1-1|GSTM1a-1a|GSTM1b-1b|GTH4|GTM1|H-B|MGC26563|MU|MU-1	P23195	glutathione S-transferase mu 1	NM_000561
562	C8A	NM_000562	1	1	0	0	0	0	0	0	0	0	0	0	0	0	0	0	731	chr1	57320443	57383894	2392	+	protein_coding	.	P6029	complement component 8 alpha subunit	NM_000562
563	IL5RA	NM_000564	1.00001	0.373948	3.37678e-09	1.6869e-05	0	1.01303e-08	0	3.07087e-09	5.06033e-05	0	0	0	0	0	3.41497e-05	0	3568	chr3	3108008	3152058	6445	-	protein_coding	CD125|CDw125|HSIL5R3|IL5R|MGC26560	P3566	interleukin 5 receptor subunit alpha	NM_000564
564	IL6R	NM_000565	1.12548	0.262737	0.939483	1.11002	0.980984	0.770475	1.05233	1.14166	0.911176	1.25612	0.977427	0.701283	1.07498	1.20453	0.875262	1.39819	3570	chr1	154377669	154441926	6565	+	protein_coding	CD126|IL-6R-1|IL-6R-alpha|IL6RA|MGC104991	P25532	interleukin 6 receptor	NM_000565
565	FCGR1A	NM_000566	0.974253	0.680983	0.4496	0.411969	0.472897	0.359919	0.51171	0.447537	0.264618	0.512452	0.389403	0.281457	0.426198	0.363054	0.199656	0.429983	2209	chr1	149754250	149764074	2176	+	protein_coding	CD64|CD64A|FCRI|FLJ18345|IGFR1	P18100	Fc fragment of IgG receptor Ia	NM_000566
566	CRP	NM_000567	1	1	0	0	0	0	0	0	0	0	0	0	0	0	0	0	1401	chr1	159682079	159684379	2015	-	protein_coding	MGC149895|MGC88244|PTX1	P6269	C-reactive protein, pentraxin-related	NM_000567
567	FCGR3A	NM_000569	1	1	0	0	0	0	0	0	0	0	0	0	0	0	0	0	2214	chr1	161511551	161520413	2150	-	protein_coding	CD16|CD16A|FCG3|FCGR3|FCGRIII|FCR-10|FCRIII|FCRIIIA|IGFR3	P22338	Fc fragment of IgG receptor IIIa	NM_000569
568	FCGR3B	NM_000570	1	0.98403	3.03153e-05	3.12416e-05	0	3.87298e-08	9.09053e-05	1.17404e-08	4.04546e-08	9.36707e-05	0	0	6.33087e-05	0	0	6.72509e-05	2215	chr1	161592988	161601753	2412	-	protein_coding	CD16|CD16b|FCG3|FCGR3	P6102	Fc fragment of IgG receptor IIIb	NM_000570
569	IL10	NM_000572	1.03704	0.373949	1.09088e-05	0.0524887	0	3.27262e-05	0	9.92054e-06	0.152054	0	0	0	0	0	0.110423	0	3586	chr1	206940948	206945839	1629	-	protein_coding	CSIF|IL-10|IL10A|MGC126450|MGC126451|TGIF	P17118	interleukin 10	NM_000572
570	CR1	NM_000573	1.01381	0.218531	4.07557e-06	0.0197917	0	1.22267e-05	0	0.0453643	0.0136345	0	0	0	0	0.0318575	0.0093733	0	1378	chr1	207669473	207815110	9966	+	protein_coding	C3BR|C4BR|CD35|KN	P34346	complement component 3b/4b receptor 1 (Knops blood group)	NM_000573
571	CD55	NM_000574	0.937161	0.371196	3.83808	3.74445	3.89433	3.72543	3.8882	3.72032	3.61983	3.88108	13.9153	12.1655	13.82	12.1617	11.2326	13.8336	1604	chr1	207494817	207534311	3207	+	protein_coding	CR|CROM|DAF|TC	P5612	CD55 molecule (Cromer blood group)	NM_000574
572	IL1A	NM_000575	0.985391	0.837742	0.16593	0.144698	0.0902804	0.107209	0.291541	0.178383	0.000210546	0.244565	0.0649962	0.0764557	0.224195	0.131332	0	0.186429	3552	chr2	113531492	113542971	2928	-	protein_coding	IL-1A|IL1|IL1-ALPHA|IL1F1	P2572	interleukin 1 alpha	NM_000575
573	IL1B	NM_000576	0.971621	0.383709	0.101026	0.0594917	0.0641004	0.0759266	0.161096	3.08545e-05	0.0858714	0.0907797	0.0457265	0.0535534	0.11829	0	0.0607815	0.0657544	3553	chr2	113587337	113594356	1498	-	protein_coding	IL-1|IL1-BETA|IL1F2	P29920	interleukin 1, beta	NM_000576
574	IL1RN	NM_000577	1.07981	0.743867	0.592944	0.703715	0.579956	0.665258	0.53038	0.0291098	0.73542	1.13804	0.496825	0.582578	0.444863	0.0201075	0.661226	1.20803	3557	chr2	113875470	113891593	2165	+	protein_coding	DIRA|ICIL-1RA|IL-1RN|IL-1ra|IL-1ra3|IL1F3|IL1RA|IRAP|MGC10430|MVCD4	P10917	interleukin 1 receptor antagonist	NM_000577
575	SLC11A1	NM_000578	0.965034	0.254647	0.41129	0.359942	0.367129	0.427291	0.438435	0.372556	0.407269	0.297843	0.291027	0.342682	0.355535	0.29408	0.324121	0.231735	6556	chr2	219246752	219261617	3852	+	protein_coding	LSH|NRAMP|NRAMP1	P12285	solute carrier family 11 member 1	NM_000578
576	CCR5	NM_000579	0.999985	0.373887	2.15852e-05	6.009e-09	0	1.33764e-08	6.47413e-05	4.05487e-09	1.39721e-08	0	0	0	4.50924e-05	0	0	0	1234	chr3	46411633	46417697	3715	+	protein_coding	CC-CKR-5|CCCKR5|CD195|CKR-5|CKR5|CMKBR5|FLJ78003|IDDM22	P33440	C-C motif chemokine receptor 5 (gene/pseudogene)	NM_000579
577	GPX1	NM_000581	0.73761	0.233148	0.492493	0.0534238	0	0.919623	0.410342	0.000128195	0.154564	0	5.54358e-06	0.888418	0.329354	6.81665e-06	0.112022	0	2876	chr3	49394609	49395791	904	-	protein_coding	GSHPX1|MGC14399|MGC88245	P12533	glutathione peroxidase 1	NM_000581
578	SPP1	NM_000582	1	1	0	0	0	0	0	0	0	0	0	0	0	0	0	0	6696	chr4	88896802	88904563	1814	+	protein_coding	BNSP|BSPI|ETA-1|MGC110940|OPN	P21543	secreted phosphoprotein 1	NM_000582
579	GC	NM_000583	1	1	0	0	0	0	0	0	0	0	0	0	0	0	0	0	2638	chr4	72607411	72671237	1958	-	protein_coding	DBP|DBP/GC|GRD3|VDBG|VDBP	P3480	group-specific component (vitamin D binding protein)	NM_000583
580	CXCL8	NM_000584	1.00643	0.870433	0.0406565	0.0499024	0.0554025	0.0657052	0	1.70972e-05	0.144794	0	0.0393936	0.0461896	0	0	0.104848	0	3576	chr4	74606223	74609433	1705	+	protein_coding	.	P34976	C-X-C motif chemokine ligand 8	NM_000584
581	IL15	NM_000585	1	1	0	0	0	0	0	0	0	0	0	0	0	0	0	0	3600	chr4	142557749	142655140	2434	+	protein_coding	IL-15|MGC9721	P4291	interleukin 15	NM_000585
582	IL2	NM_000586	0.967818	0.373887	0.0472051	1.33412e-05	0.137193	2.96981e-05	0	9.00262e-06	3.10207e-05	0	0.100198	0	0	0	0	0	3558	chr4	123372626	123377650	798	-	protein_coding	IL-2|TCGF|lymphokine	P7430	interleukin 2	NM_000586
583	C7	NM_000587	1	1	0	0	0	0	0	0	0	0	0	0	0	0	0	0	730	chr5	40909599	40983042	3865	+	protein_coding	.	P23336	complement component 7	NM_000587
584	IL3	NM_000588	1	1	0	0	0	0	0	0	0	0	0	0	0	0	0	0	3562	chr5	131396347	131398896	924	+	protein_coding	IL-3|MCGF|MGC79398|MGC79399|MULTI-CSF	P17865	interleukin 3	NM_000588
585	IL4	NM_000589	1	1	0	0	0	0	0	0	0	0	0	0	0	0	0	0	3565	chr5	132009678	132018370	618	+	protein_coding	BCGF-1|BCGF1|BSF1|IL-4|MGC79402	P30960	interleukin 4	NM_000589
586	IL9	NM_000590	1	1	0	0	0	0	0	0	0	0	0	0	0	0	0	0	3578	chr5	135227935	135231516	591	-	protein_coding	HP40|IL-9|P40	P10529	interleukin 9	NM_000590
587	CD14	NM_000591	1	1	0	0	0	0	0	0	0	0	0	0	0	0	0	0	929	chr5	140011313	140013286	1698	-	protein_coding	.	P4289	CD14 molecule	NM_000591
588	TAP1	NM_000593	1	1	0	0	0	0	0	0	0	0	0	0	0	0	0	0	6890	chr6	32812986	32821748	3145	-	protein_coding	ABC17|ABCB2|APT1|D6S114E|FLJ26666|FLJ41500|PSF1|RING4|TAP1*0102N|TAP1N	P9659	transporter 1, ATP-binding cassette, sub-family B (MDR/TAP)	NM_000593
589	TAP1	NM_000593_1	1	1	0	0	0	0	0	0	0	0	0	0	0	0	0	0	6890	chr6	32812986	32821748	3145	-	protein_coding	ABC17|ABCB2|APT1|D6S114E|FLJ26666|FLJ41500|PSF1|RING4|TAP1*0102N|TAP1N	P9659	transporter 1, ATP-binding cassette, sub-family B (MDR/TAP)	NM_000593_1
590	TAP1	NM_000593_2	1	1	0	0	0	0	0	0	0	0	0	0	0	0	0	0	6890	chr6	32812986	32821748	3145	-	protein_coding	ABC17|ABCB2|APT1|D6S114E|FLJ26666|FLJ41500|PSF1|RING4|TAP1*0102N|TAP1N	P9659	transporter 1, ATP-binding cassette, sub-family B (MDR/TAP)	NM_000593_2
591	TAP1	NM_000593_3	1	1	0	0	0	0	0	0	0	0	0	0	0	0	0	0	6890	chr6	32812986	32821748	3145	-	protein_coding	ABC17|ABCB2|APT1|D6S114E|FLJ26666|FLJ41500|PSF1|RING4|TAP1*0102N|TAP1N	P9659	transporter 1, ATP-binding cassette, sub-family B (MDR/TAP)	NM_000593_3
592	TAP1	NM_000593_4	1	1	0	0	0	0	0	0	0	0	0	0	0	0	0	0	6890	chr6	32812986	32821748	3145	-	protein_coding	ABC17|ABCB2|APT1|D6S114E|FLJ26666|FLJ41500|PSF1|RING4|TAP1*0102N|TAP1N	P9659	transporter 1, ATP-binding cassette, sub-family B (MDR/TAP)	NM_000593_4
593	TAP1	NM_000593_5	1.11863	0.406435	1.35016	1.51189	1.27543	1.1424	1.59455	1.71319	1.43845	1.35974	1.4261	1.20012	2.0219	2.2757	1.70107	1.57895	6890	chr6	32812986	32821748	3145	-	protein_coding	ABC17|ABCB2|APT1|D6S114E|FLJ26666|FLJ41500|PSF1|RING4|TAP1*0102N|TAP1N	P9659	transporter 1, ATP-binding cassette, sub-family B (MDR/TAP)	NM_000593_5
594	TAP1	NM_000593_6	1	1	0	0	0	0	0	0	0	0	0	0	0	0	0	0	6890	chr6	32812986	32821748	3145	-	protein_coding	ABC17|ABCB2|APT1|D6S114E|FLJ26666|FLJ41500|PSF1|RING4|TAP1*0102N|TAP1N	P9659	transporter 1, ATP-binding cassette, sub-family B (MDR/TAP)	NM_000593_6
595	TAP1	NM_000593_7	1	1	0	0	0	0	0	0	0	0	0	0	0	0	0	0	6890	chr6	32812986	32821748	3145	-	protein_coding	ABC17|ABCB2|APT1|D6S114E|FLJ26666|FLJ41500|PSF1|RING4|TAP1*0102N|TAP1N	P9659	transporter 1, ATP-binding cassette, sub-family B (MDR/TAP)	NM_000593_7
596	TNF	NM_000594	1	1	0	0	0	0	0	0	0	0	0	0	0	0	0	0	7124	chr6	31543344	31546112	1675	+	protein_coding	DIF|TNF-alpha|TNFA|TNFSF2	P20721	tumor necrosis factor	NM_000594
597	TNF	NM_000594_1	1	1	0	0	0	0	0	0	0	0	0	0	0	0	0	0	7124	chr6	31543344	31546112	1675	+	protein_coding	DIF|TNF-alpha|TNFA|TNFSF2	P20721	tumor necrosis factor	NM_000594_1
598	TNF	NM_000594_2	1.14278	0.424383	0.0247958	0.217349	0	0.000159194	0.0729931	0.573056	0.000166283	0	0	0	0.0519978	0.487079	0	0	7124	chr6	31543344	31546112	1675	+	protein_coding	DIF|TNF-alpha|TNFA|TNFSF2	P20721	tumor necrosis factor	NM_000594_2
599	TNF	NM_000594_3	1	1	0	0	0	0	0	0	0	0	0	0	0	0	0	0	7124	chr6	31543344	31546112	1675	+	protein_coding	DIF|TNF-alpha|TNFA|TNFSF2	P20721	tumor necrosis factor	NM_000594_3
600	TNF	NM_000594_4	1	1	0	0	0	0	0	0	0	0	0	0	0	0	0	0	7124	chr6	31543344	31546112	1675	+	protein_coding	DIF|TNF-alpha|TNFA|TNFSF2	P20721	tumor necrosis factor	NM_000594_4
601	TNF	NM_000594_5	1	1	0	0	0	0	0	0	0	0	0	0	0	0	0	0	7124	chr6	31543344	31546112	1675	+	protein_coding	DIF|TNF-alpha|TNFA|TNFSF2	P20721	tumor necrosis factor	NM_000594_5
602	TNF	NM_000594_6	1	1	0	0	0	0	0	0	0	0	0	0	0	0	0	0	7124	chr6	31543344	31546112	1675	+	protein_coding	DIF|TNF-alpha|TNFA|TNFSF2	P20721	tumor necrosis factor	NM_000594_6
603	TNF	NM_000594_7	1	1	0	0	0	0	0	0	0	0	0	0	0	0	0	0	7124	chr6	31543344	31546112	1675	+	protein_coding	DIF|TNF-alpha|TNFA|TNFSF2	P20721	tumor necrosis factor	NM_000594_7
604	LTA	NM_000595	0.965905	0.119114	0.0500616	1.40796e-05	0.068213	0.0806714	0	9.50089e-06	3.27376e-05	0	0.0486851	0.0570631	0	0	0	0	4049	chr6	31539876	31542100	1614	+	protein_coding	LT|TNFB|TNFSF1	P24041	lymphotoxin alpha	NM_000595
605	LTA	NM_000595_1	1	1	0	0	0	0	0	0	0	0	0	0	0	0	0	0	4049	chr6	31539876	31542100	1614	+	protein_coding	LT|TNFB|TNFSF1	P24041	lymphotoxin alpha	NM_000595_1
606	LTA	NM_000595_2	1	1	0	0	0	0	0	0	0	0	0	0	0	0	0	0	4049	chr6	31539876	31542100	1614	+	protein_coding	LT|TNFB|TNFSF1	P24041	lymphotoxin alpha	NM_000595_2
607	LTA	NM_000595_3	1	1	0	0	0	0	0	0	0	0	0	0	0	0	0	0	4049	chr6	31539876	31542100	1614	+	protein_coding	LT|TNFB|TNFSF1	P24041	lymphotoxin alpha	NM_000595_3
608	LTA	NM_000595_4	1	1	0	0	0	0	0	0	0	0	0	0	0	0	0	0	4049	chr6	31539876	31542100	1614	+	protein_coding	LT|TNFB|TNFSF1	P24041	lymphotoxin alpha	NM_000595_4
609	LTA	NM_000595_5	1	1	0	0	0	0	0	0	0	0	0	0	0	0	0	0	4049	chr6	31539876	31542100	1614	+	protein_coding	LT|TNFB|TNFSF1	P24041	lymphotoxin alpha	NM_000595_5
610	LTA	NM_000595_6	1	1	0	0	0	0	0	0	0	0	0	0	0	0	0	0	4049	chr6	31539876	31542100	1614	+	protein_coding	LT|TNFB|TNFSF1	P24041	lymphotoxin alpha	NM_000595_6
611	IGFBP1	NM_000596	1	1	0	0	0	0	0	0	0	0	0	0	0	0	0	0	3484	chr7	45927959	45933267	1650	+	protein_coding	AFBP|IBP1|IGF-BP25|PP12|hIGFBP-1	P29219	insulin like growth factor binding protein 1	NM_000596
612	IGFBP2	NM_000597	0.930328	0.222072	7.28104	7.17685	7.38408	7.30212	7.14695	7.19769	7.15488	7.17766	166.592	156.047	140.861	145.58	140.775	144.833	3485	chr2	217498127	217529158	1429	+	protein_coding	IBP2|IGF-BP53	P33403	insulin like growth factor binding protein 2	NM_000597
613	IGFBP3	NM_000598	0.898009	0.133705	1.828	1.6728	1.75186	1.90691	1.82104	1.78843	1.67943	1.53983	2.37609	2.7369	2.53581	2.45064	2.19087	1.92365	3486	chr7	45951844	45960871	3166	-	protein_coding	BP-53|IBP3	P2949	insulin-like growth factor binding protein 3	NM_000598
614	IGFBP5	NM_000599	0.963347	0.334378	3.87572	3.82184	3.80978	3.84789	3.96491	3.84108	3.81731	3.80693	13.0675	13.3325	14.6293	13.311	13.0286	13.0929	3488	chr2	217536828	217560272	6239	-	protein_coding	IBP5	P22105	insulin like growth factor binding protein 5	NM_000599
615	IL6	NM_000600	0.980339	0.373887	0.0286554	8.05463e-06	0.0842964	1.79301e-05	0	5.43526e-06	1.87286e-05	0	0.0604737	0	0	0	0	0	3569	chr7	22766766	22771621	1184	+	protein_coding	BSF2|HGF|HSF|IFNB2|IL-6	P4893	interleukin 6	NM_000600
616	HGF	NM_000601	1	1	0	0	0	0	0	0	0	0	0	0	0	0	0	0	3082	chr7	81331444	81399452	4412	-	protein_coding	DFNB39|F-TCF|HGFB|HPTA|SF	P15717	hepatocyte growth factor	NM_000601
617	SERPINE1	NM_000602	1.02373	0.83618	1.07831	1.11214	1.23817	1.00397	0.978347	1.01433	1.34376	0.946297	1.36346	0.999853	0.971289	1.01823	1.5307	0.935003	5054	chr7	100770370	100782547	3190	+	protein_coding	PAI|PAI-1|PAI1|PLANH1	P8361	serpin family E member 1	NM_000602
618	NOS3	NM_000603	1.06195	0.247089	0.0900672	0.176783	0.0600102	0.11731	0.0923098	0.256949	0.0546526	0.211041	0.0427919	0.0840107	0.0661939	0.194602	0.038141	0.159025	4846	chr7	150688144	150711687	6185	+	protein_coding	ECNOS|eNOS	P27032	nitric oxide synthase 3	NM_000603
619	IFNA2	NM_000605	1	1	0	0	0	0	0	0	0	0	0	0	0	0	0	0	3440	chr9	21384254	21385396	1143	-	protein_coding	IFN-alphaA|IFNA|INFA2|MGC125764|MGC125765	P5131	interferon, alpha 2	NM_000605
620	C8G	NM_000606	1.09145	0.306882	0.0488921	0.175137	0	0.14197	0	0.181202	0.000151645	0.325711	0	0.102648	0	0.133558	0	0.255227	733	chr9	139839698	139841426	877	+	protein_coding	C8C|MGC142186	P35671	complement component 8, gamma polypeptide	NM_000606
621	ORM1	NM_000607	1.00567	0.966129	0.164886	0.173042	0	0.00021982	0.44687	6.66377e-05	0.319933	0.181395	0	0	0.363414	0	0.24684	0.135409	5004	chr9	117085303	117088759	839	+	protein_coding	AGP-A|AGP1|ORM	P11411	orosomucoid 1	NM_000607
622	ORM2	NM_000608	1.09128	0.116311	2.71125e-05	0.126051	0	8.13359e-05	0	0.189986	8.49581e-05	0.18027	0	0	0	0.140492	0	0.134329	5005	chr9	117092069	117095536	844	+	protein_coding	AGP-B|AGP-B'|AGP2	P18085	orosomucoid 2	NM_000608
623	CXCL12	NM_000609	0.827876	0.0070637	3.30429	3.03178	3.37024	3.21861	3.3199	3.06683	3.04481	2.98236	9.3703	8.26804	8.99435	7.36782	7.21323	6.95694	6387	chr10	44865601	44880545	4354	-	protein_coding	IRH|PBSF|SCYB12|SDF1|SDF1A|SDF1B|TLSF|TPAR1	P5048	C-X-C motif chemokine ligand 12	NM_000609
624	CD44	NM_000610	1.01805	0.919432	0.644788	0.670604	0.562184	0.270514	1.00561	0.545854	0.865087	0.579067	0.478496	0.204269	1.00865	0.459003	0.817331	0.498371	960	chr11	35160417	35253949	6706	+	protein_coding	CDW44|CSPG8|ECMR-III|HCELL|HUTCH-I|IN|LHR|MC56|MDU2|MDU3|MGC10468|MIC4|Pgp1	P7656	CD44 molecule (Indian blood group)	NM_000610
625	CD59	NM_000611	0.979675	0.570345	3.85859	3.82896	3.81723	3.89558	3.86188	3.83878	3.74853	3.89577	13.1402	13.8148	13.5523	13.2882	12.3748	13.9863	966	chr11	33724556	33758025	8065	-	protein_coding	16.3A5|1F5|EJ16|EJ30|EL32|FLJ38134|FLJ92039|G344|HRF-20|HRF20|MAC-IP|MACIF|MEM43|MGC2354|MIC11|MIN1|MIN2|MIN3|MIRL|MSK21|p18-20	P10776	CD59 molecule	NM_000611
626	IGF2	NM_000612	0.927608	0.433986	0.22163	0.113216	0.346359	0.148707	0.161213	6.63032e-05	0.31599	0	0.27232	0.107726	0.118401	0	0.243445	0	3481	chr11	2150342	2162354	5700	-	protein_coding	C11orf43|FLJ22066|FLJ44734|INSIGF|pp9974	P12140	insulin like growth factor 2	NM_000612
627	HPX	NM_000613	1.04757	0.634685	0.120583	0.187625	0.27212	0.000200693	0.0756042	0.0885612	0.0786687	0.375523	0.208401	0	0.0539118	0.063123	0.055444	0.299545	3263	chr11	6452268	6462254	1623	-	protein_coding	FLJ56652|HX	P27644	hemopexin	NM_000613
628	CNTF	NM_000614	1.01067	0.929273	0.111468	0.126776	0	0.000152174	0.311358	4.61306e-05	0.351086	0	0	0	0.241124	0	0.274076	0	1270	chr11	58390146	58390339	194	+	protein_coding	HCNTF	P1453	ciliary neurotrophic factor	NM_000614
629	NCAM1	NM_000615	0.975035	0.104392	0.0588887	0.0224144	0.0464435	0.0445182	0.0853358	1.54512e-05	0.0328896	0.0340798	0.0329307	0.0310291	0.0610284	0	0.0227949	0.0242899	4684	chr11	112831969	113149158	8526	+	protein_coding	CD56|MSK39|NCAM	P5956	neural cell adhesion molecule 1	NM_000615
630	CD4	NM_000616	1	1	0	0	0	0	0	0	0	0	0	0	0	0	0	0	920	chr12	6898638	6929976	3767	+	protein_coding	CD4mut	P21375	CD4 molecule	NM_000616
631	SLC11A2	NM_000617	2.02137	0.0405152	0.988676	2.00401	0	1.37243	1.24125	1.94618	1.72232	2.28694	0.000445678	1.57997	1.36567	2.84971	2.28808	3.90259	4891	chr12	51373566	51422058	5301	-	protein_coding	DCT1|DMT1|FLJ37416|NRAMP2	.	solute carrier family 11 member 2	NM_000617
632	IGF1	NM_000618	1	1	0	0	0	0	0	0	0	0	0	0	0	0	0	0	3479	chr12	102789645	102874378	7863	-	protein_coding	IGF-I|IGF1A|IGFI	P18601	insulin like growth factor 1	NM_000618
633	IFNG	NM_000619	1	1	0	0	0	0	0	0	0	0	0	0	0	0	0	0	3458	chr12	68548550	68553521	1210	-	protein_coding	IFG|IFI	P14832	interferon, gamma	NM_000619
634	NOS1	NM_000620	1.00196	0.373863	2.74733e-06	0.00283062	0	5.34172e-06	2.90026e-06	5.40117e-07	5.4623e-06	0.00846928	0	2.38952e-06	2.26489e-06	0	2.41376e-06	0.00599963	4842	chr12	117645947	117799607	12534	-	protein_coding	IHPS1|NC-NOS|NOS|bNOS|nNOS	P32276	nitric oxide synthase 1	NM_000620
635	HTR2A	NM_000621	0.986804	0.373959	0.0191703	5.30154e-06	0	0.056758	5.38012e-06	3.57748e-06	1.23271e-05	0	0	0.0397913	5.35369e-06	0	0	0	3356	chr13	47405677	47471211	5442	-	protein_coding	5-HT2A|HTR2	P30416	5-hydroxytryptamine (serotonin) receptor 2A, G protein-coupled	NM_000621
636	BDKRB2	NM_000623	1.21969	0.0686614	0.679584	0.9661	0.807685	0.657807	0.562623	1.12969	0.890352	0.863072	0.753218	0.574028	0.4776	1.1865	0.848956	0.825428	624	chr14	96671135	96710666	4197	+	protein_coding	B2R|BK-2|BK2|BKR2|BRB2|DKFZp686O088	P5376	bradykinin receptor B2	NM_000623
637	SERPINA5	NM_000624	1.27117	0.00544765	3.73402	4.08018	3.83232	3.68972	3.67471	4.07004	4.01602	4.15125	13.2895	11.8416	11.7822	15.7729	15.1017	16.8865	5104	chr14	95047706	95059457	2337	+	protein_coding	PAI3|PCI|PLANH3|PROCI	P8925	serpin family A member 5	NM_000624
638	NOS2	NM_000625	0.995848	0.776877	0.016743	0.01074	0	0.049657	0	0.0319657	1.76682e-05	0	0	0.0347115	0	0.0223365	0	0	4843	chr17	26083792	26127555	4206	-	protein_coding	HEP-NOS|INOS|NOS|NOS2A	P28429	nitric oxide synthase 2	NM_000625
639	CD79B	NM_000626	1	1	0	0	0	0	0	0	0	0	0	0	0	0	0	0	974	chr17	62006098	62009704	1261	-	protein_coding	B29|IGB	P2003	CD79b molecule	NM_000626
640	LTBP1	NM_000627	1	1	0	0	0	0	0	0	0	0	0	0	0	0	0	0	4052	chr2	33172369	33624575	6585	+	protein_coding	MGC163161	P14118	latent transforming growth factor beta binding protein 1	NM_000627
641	IL10RB	NM_000628	1.05125	0.350071	3.1609	3.233	3.07735	3.19113	3.21065	3.16353	3.33574	3.19381	7.4665	8.09268	8.26564	7.94806	9.05063	8.2108	3588	chr21	34638665	34669539	1961	+	protein_coding	CDW210B|CRF2-4|CRFB4|D21S58|D21S66|IL-10R2	P6609	interleukin 10 receptor subunit beta	NM_000628
642	IFNAR1	NM_000629	0.956294	0.427654	3.77216	3.70769	3.6552	3.87802	3.77467	3.64938	3.76382	3.7076	11.6383	13.6369	12.6986	11.5302	12.519	12.1546	3454	chr21	34697214	34732128	6094	+	protein_coding	AVP|IFN-alpha-REC|IFNAR|IFNBR|IFRC	P3152	interferon alpha and beta receptor subunit 1	NM_000629
643	NCF4	NM_000631	0.931991	0.487341	0.233532	0.13192	0	0.43278	0.235479	0.202165	0.0929445	0.0979955	5.07723e-05	0.348133	0.177521	0.150107	0.0658531	0.0713033	4689	chr22	37257030	37274059	1398	+	protein_coding	MGC3810|NCF|P40PHOX|SH3PXD4	P13860	neutrophil cytosolic factor 4	NM_000631
644	ITGAM	NM_000632	1.04615	0.175999	0.0385661	0.103661	0.0367601	0.0547689	0.0240035	0.0830281	0.0498584	0.175156	0.0260111	0.0383067	0.0168229	0.0590862	0.0347832	0.130309	3684	chr16	31271288	31344213	4955	+	protein_coding	CD11B|CR3A|MAC-1|MAC1A|MGC117044|MO1A|SLEB6	P18603	integrin subunit alpha M	NM_000632
645	BCL2	NM_000633	0.913612	0.182077	0.841189	0.710843	0.934629	0.815218	0.768598	0.834164	0.637626	0.652316	0.914426	0.755489	0.704377	0.781568	0.552147	0.57693	596	chr18	60790579	60986613	7491	-	protein_coding	Bcl-2	P1041	B-cell CLL/lymphoma 2	NM_000633
646	CXCR1	NM_000634	0.978617	0.315746	0.0664288	0.0352445	0.107333	0.0436625	0.0474022	0.0556356	0.0494557	0	0.0776206	0.030412	0.0334673	0.0392048	0.0345173	0	3577	chr2	219027568	219031716	2486	-	protein_coding	C-C|C-C-CKR-1|CD128|CD181|CDw128a|CKR-1|CMKAR1|IL8R1|IL8RA|IL8RBA	P1774	C-X-C motif chemokine receptor 1	NM_000634
647	RFX2	NM_000635	0.933096	0.635684	1.12588	1.02597	1.2246	0.739773	1.34495	1.17351	0.925753	0.966229	1.3413	0.665354	1.54158	1.25369	0.894153	0.961849	5990	chr19	5993175	6110664	4112	-	protein_coding	FLJ14226	P11160	regulatory factor X2	NM_000635
648	SOD2	NM_000636	0.981193	0.859626	3.5363	3.50891	3.38488	3.76783	3.4247	3.58498	3.3601	3.57085	9.4788	12.5625	9.74802	10.9838	9.21797	10.9628	6648	chr6	160100149	160114353	1940	-	protein_coding	IPOB|MNSOD|MVCD6	P19701	superoxide dismutase 2, mitochondrial	NM_000636
649	GSR	NM_000637	0.976547	0.376376	5.4652	5.43096	5.41626	5.47483	5.50317	5.44821	5.45914	5.38441	41.8422	43.258	44.3967	42.5952	42.7697	41.0729	2936	chr8	30535580	30585486	3160	-	protein_coding	MGC78522	P22065	glutathione reductase	NM_000637
650	VTN	NM_000638	0.931913	0.0356962	0.101761	2.91875e-05	0.163401	0.0669277	0.0729159	1.96957e-05	6.7866e-05	0	0.120437	0.047065	0.0519269	0	0	0	7448	chr17	26694299	26697373	1677	-	protein_coding	V75|VN|VNT	P35227	vitronectin	NM_000638
651	FASLG	NM_000639	1	1	0	0	0	0	0	0	0	0	0	0	0	0	0	0	356	chr1	172628148	172636012	1896	+	protein_coding	APT1LG1|CD178|CD95-L|CD95L|FASL|TNFSF6	P5616	Fas ligand	NM_000639
652	IL13RA2	NM_000640	1	1	0	0	0	0	0	0	0	0	0	0	0	0	0	0	3598	chrX	114238538	114252207	1373	-	protein_coding	CD213A2|CT19|IL-13R|IL13BP	P14535	interleukin 13 receptor, alpha 2	NM_000640
653	IL11	NM_000641	0.93176	0.777538	0.304371	0.202401	0.769221	0.000417367	1.61948e-06	0.537583	0.00042868	0	0.706178	5.23309e-05	4.72631e-05	0.450901	4.96813e-05	4.63746e-05	3589	chr19	55875750	55881831	2378	-	protein_coding	AGIF|IL-11	P21481	interleukin 11	NM_000641
654	AGL	NM_000642	0.910982	0.443666	2.20439	2.06988	1.96787	2.25819	2.35912	2.19241	2.15774	1.83298	2.92252	3.76563	4.13432	3.56533	3.44403	2.5846	178	chr1	100315640	100389579	8238	+	protein_coding	GDE	P26368	amylo-alpha-1, 6-glucosidase, 4-alpha-glucanotransferase	NM_000642
655	AGL	NM_000643	1.22535	0.374347	0.000473727	0.293663	0.000231602	0.000351356	0.00083815	6.09479e-05	0.000210005	0.745933	0.000257846	0.000101833	0.000610466	0	0	0.680691	178	chr1	100315640	100389579	8238	+	protein_coding	GDE	P26368	amylo-alpha-1, 6-glucosidase, 4-alpha-glucanotransferase	NM_000643
656	AGL	NM_000644	0.999982	0.978637	0.000795876	0.000770081	0.000100213	9.74915e-07	0.00228529	9.95316e-05	0.000430971	0.00177919	7.1022e-05	0	0.00159029	6.82985e-05	0.000291892	0.00126506	178	chr1	100315640	100389579	8238	+	protein_coding	GDE	P26368	amylo-alpha-1, 6-glucosidase, 4-alpha-glucanotransferase	NM_000644
657	AGL	NM_000645	0.956509	0.374019	0.0641682	1.80554e-05	0	0.184529	0	1.21838e-05	4.19821e-05	0	0	0.135643	0	0	0	0	178	chr1	100315640	100389579	8238	+	protein_coding	GDE	P26368	amylo-alpha-1, 6-glucosidase, 4-alpha-glucanotransferase	NM_000645
658	AGL	NM_000646	1.11712	0.331157	0.0846221	0.244413	0.240106	0.000217154	0	6.58295e-05	0.309232	0.394775	0.181847	0	0	0	0.237649	0.317078	178	chr1	100315640	100389579	8238	+	protein_coding	GDE	P26368	amylo-alpha-1, 6-glucosidase, 4-alpha-glucanotransferase	NM_000646
659	CR1	NM_000651	1	0.117089	6.35557e-10	3.15922e-06	0	1.90667e-09	0	4.51097e-06	4.96669e-06	0	0	0	0	3.09692e-06	3.33053e-06	0	1378	chr1	207669473	207815110	9966	+	protein_coding	C3BR|C4BR|CD35|KN	P34346	complement component 3b/4b receptor 1 (Knops blood group)	NM_000651
660	SELL	NM_000655	0.737021	0.00788669	2.68964	2.24941	2.71139	2.54351	2.80218	2.26419	2.19935	2.28336	5.56696	4.80627	5.98022	3.79757	3.57183	3.89922	6402	chr1	169659806	169680843	2442	-	protein_coding	CD62L|LAM1|LECAM1|LEU8|LNHR|LSEL|LYAM1|PLNHR|TQ1	.	selectin L	NM_000655
661	BCL2	NM_000657	1.02733	0.847026	0.369116	0.408017	0.335115	0.476498	0.289058	0.000164323	0.557037	0.593806	0.262659	0.389188	0.222156	0	0.468731	0.512963	596	chr18	60790579	60986613	7491	-	protein_coding	Bcl-2	P1041	B-cell CLL/lymphoma 2	NM_000657
662	TGFB1	NM_000660	1.38823	0.00190009	4.56767	5.04092	4.7075	4.51217	4.47222	5.02325	5.02895	5.07011	25.2128	21.7056	21.2175	31.474	31.49	32.8251	7040	chr19	41836436	41859838	2583	-	protein_coding	CED|DPD1|LAP|TGFB|TGFbeta	P35161	transforming growth factor, beta 1	NM_000660
663	RPL9	NM_000661	0.86996	0.0998991	10.0844	9.8834	10.1867	9.98429	10.075	9.73698	9.9032	9.99803	1168.34	1006.92	1078.69	851.066	951.617	1029.11	6133	chr4	39455745	39460568	749	-	protein_coding	DKFZp313J1510|FLJ27456|MGC15545|NPC-A-16|RPL9P7|RPL9P8|RPL9P9	P17553	ribosomal protein L9	NM_000661
664	NAT1	NM_000662	1.17317	0.670739	1.06901	1.29942	1.75391	0.149274	0.857779	0.706694	1.4348	1.60803	2.37911	0.106623	0.813287	0.630627	1.69523	2.06136	9	chr8	18027971	18081198	4532	+	protein_coding	AAC1|MNAT|NAT-1|NATI	P22632	N-acetyltransferase 1 (arylamine N-acetyltransferase)	NM_000662
665	ABAT	NM_000663	1.18526	0.284844	0.248658	0.493864	0	0.491419	0.212229	0.480664	0.242747	0.71897	0	0.403632	0.158737	0.394729	0.181741	0.650236	18	chr16	8768444	8878432	5930	+	protein_coding	FLJ17813|FLJ30272|GABA-AT|GABAT|NPD009	P14995	4-aminobutyrate aminotransferase	NM_000663
666	ACHE	NM_000665	0.938692	0.525966	0.12838	0.0371038	0.000149823	0.355121	0	0.108464	0.000109927	0	0.000155172	0.277753	0	0.0778943	0	2.26357e-05	43	chr7	100487615	100493754	2388	-	protein_coding	ARACHE|N-ACHE|YT	P13334	acetylcholinesterase (Cartwright blood group)	NM_000665
667	ACY1	NM_000666	0.832584	0.113052	4.53273	4.26839	4.73135	4.44819	4.39558	4.19658	4.21255	4.38812	25.6437	20.7269	20.0669	17.3086	17.4457	20.0866	95	chr3	52017300	52023218	1689	+	protein_coding	ACY1D|ACYLASE	P20283	aminoacylase 1	NM_000666
668	ADH1A	NM_000667	1	1	0	0	0	0	0	0	0	0	0	0	0	0	0	0	124	chr4	100197523	100212185	1500	-	protein_coding	ADH1	P10186	alcohol dehydrogenase 1A (class I), alpha polypeptide	NM_000667
669	ADH1B	NM_000668	0.992248	0.373887	0.01123	3.14282e-06	0.0334242	6.99611e-06	0	2.12077e-06	7.30767e-06	0	0.0235888	0	0	0	0	0	125	chr4	100227544	100242599	2814	-	protein_coding	ADH2|DKFZp686C06125	P4124	alcohol dehydrogenase 1B (class I), beta polypeptide	NM_000668
670	ADH1C	NM_000669	1.01702	0.373949	5.00539e-06	0.0243488	0	1.50161e-05	0	4.55194e-06	0.0718428	0	0	0	0	0	0.0506413	0	126	chr4	100257649	100274202	1758	-	protein_coding	ADH3	P23590	alcohol dehydrogenase 1C (class I), gamma polypeptide	NM_000669
671	ADH4	NM_000670	1.01468	0.373949	4.31564e-06	0.0210235	0	1.29469e-05	0	3.92467e-06	0.0621693	0	0	0	0	0	0.0436603	0	127	chr4	100044808	100065449	2246	-	protein_coding	ADH-2	P27238	alcohol dehydrogenase 4 (class II), pi polypeptide	NM_000670
672	ADH5	NM_000671	1.01553	0.632353	4.88295	4.90519	4.94671	4.8885	4.81041	4.93805	4.87682	4.90004	29.9383	28.4784	27.0858	29.6107	28.2342	29.0703	128	chr4	99992130	100009939	2651	-	protein_coding	ADH-3|ADHX|FDH|GSNOR	P13612	alcohol dehydrogenase 5 (class III), chi polypeptide	NM_000671
673	ADH6	NM_000672	1.12277	0.00189829	0.0234976	0.190555	0.0692418	0.000139832	0	0.201836	0.179391	0.19035	0.0494935	0	0	0.149873	0.131487	0.142402	130	chr4	100123795	100140403	3145	-	protein_coding	ADH-5	P24462	alcohol dehydrogenase 6 (class V)	NM_000672
674	ADH7	NM_000673	1	1	0	0	0	0	0	0	0	0	0	0	0	0	0	0	131	chr4	100333418	100356667	2397	-	protein_coding	ADH4	P29870	alcohol dehydrogenase 7 (class IV), mu or sigma polypeptide	NM_000673
675	ADORA1	NM_000674	0.643394	0.285454	1.93866	1.30244	2.29485	1.46885	1.93563	2.10472	0.473179	0.77404	3.9175	1.75809	2.82796	3.29687	0.382999	0.71953	134	chr1	203096836	203136533	2919	+	protein_coding	RDC7	P14471	adenosine A1 receptor	NM_000674
676	ADORA2A	NM_000675	1	1	0	0	0	0	0	0	0	0	0	0	0	0	0	0	135	chr22	24819565	24828694	553	+	protein_coding	ADORA2|RDC8|hA2aR	P32517	adenosine A2a receptor	NM_000675
677	ADORA2B	NM_000676	1.10093	0.428232	1.42413	1.56285	1.38482	1.36538	1.51739	1.69602	1.24268	1.70342	1.61733	1.56775	1.86458	2.23686	1.35794	2.27247	136	chr17	15848231	15879210	1885	+	protein_coding	ADORA2	P30079	adenosine A2b receptor	NM_000676
678	ADORA3	NM_000677	1	0.525062	3.50587e-06	4.73814e-06	0	5.48857e-06	5.02904e-06	4.34191e-06	5.10965e-06	4.76285e-06	0	3.68471e-06	3.50749e-06	2.9801e-06	3.42448e-06	3.4588e-06	140	chr1	112042051	112046743	2868	-	protein_coding	A3AR|AD026|bA552M11.5	P27383	adenosine A3 receptor	NM_000677
679	ADRA1D	NM_000678	1.02284	0.486811	0.049413	0.0819982	0.0671729	0.0797975	0	0.149548	0.0459371	0.0480596	0.047954	0.0563849	0	0.109	0.0319983	0.0343955	146	chr20	4201278	4229659	2666	-	protein_coding	ADRA1|ADRA1A|ADRA1R|ALPHA1|DAR|dJ779E11.2	P4529	adrenoceptor alpha 1D	NM_000678
680	ADRA1B	NM_000679	1	1	0	0	0	0	0	0	0	0	0	0	0	0	0	0	147	chr5	159343740	159400017	2254	+	protein_coding	ADRA1|ALPHA1BAR	P11772	adrenoceptor alpha 1B	NM_000679
681	ADRA1A	NM_000680	1	1	0	0	0	0	0	0	0	0	0	0	0	0	0	0	148	chr8	26605667	26722922	3946	-	protein_coding	ADRA1C|ADRA1L1|ALPHA1AAR	P14488	adrenoceptor alpha 1A	NM_000680
682	ADRA2A	NM_000681	0.984524	0.685651	0.168784	0.146283	0.25353	0.106216	0.142493	0.166205	0.176165	0.0951316	0.192906	0.0757162	0.10397	0.121831	0.128907	0.0691213	150	chr10	112836790	112840662	3873	+	protein_coding	ADRA2|ADRA2R|ADRAR|ALPHA2AAR|ZNF32	P26728	adrenoceptor alpha 2A	NM_000681
683	ADRA2B	NM_000682	0.981272	0.77804	0.56185	0.534575	0.674231	0.483641	0.520516	0.391906	0.58694	0.614815	0.597822	0.395779	0.434976	0.311459	0.499121	0.535678	151	chr2	96778623	96781984	3362	-	protein_coding	ADRA2L1|ADRA2RL1|ADRARL1|ALPHA2BAR	P18391	adrenoceptor alpha 2B	NM_000682
684	ADRA2C	NM_000683	0.914607	0.261709	5.05203	4.92325	5.16285	5.11177	4.86413	4.86359	4.92676	4.97717	34.9372	33.4145	28.1514	28.0701	29.2628	30.7226	152	chr4	3768296	3770253	1958	+	protein_coding	ADRA2L2|ADRA2RL2|ADRARL2|ALPHA2CAR	P16517	adrenoceptor alpha 2C	NM_000683
685	ADRB1	NM_000684	0.948494	0.585987	0.877358	0.801069	0.845144	0.998076	0.780096	0.983537	0.803593	0.589213	0.799368	0.992446	0.718046	0.97584	0.741067	0.509549	153	chr10	115803806	115806667	2862	+	protein_coding	ADRB1R|B1AR|BETA1AR|RHR	P19510	adrenoceptor beta 1	NM_000684
686	AGTR1	NM_000685	1	0.373806	5.66369e-11	2.61661e-07	0	1.69911e-10	0	5.1506e-11	1.77478e-10	7.84754e-07	0	0	0	0	0	5.72775e-07	185	chr3	148415658	148460790	2571	+	protein_coding	AG2S|AGTR1A|AGTR1B|AT1|AT1B|AT1R|AT2R1|AT2R1A|AT2R1B|HAT1R	P32258	angiotensin II receptor type 1	NM_000685
687	AGTR2	NM_000686	1	1	0	0	0	0	0	0	0	0	0	0	0	0	0	0	186	chrX	115301958	115306225	2899	+	protein_coding	AT2|ATGR2|MRX88	P1858	angiotensin II receptor type 2	NM_000686
688	AHCY	NM_000687	0.896436	0.166607	6.4886	6.33087	6.62241	6.49421	6.33484	6.37923	6.35013	6.26061	97.8446	88.7099	79.7966	82.1179	80.1624	76.2337	191	chr20	32868071	32899608	2538	-	protein_coding	SAHH	P31663	adenosylhomocysteinase	NM_000687
689	ALAS1	NM_000688	0.920096	0.492111	2.57397	2.45382	2.74843	2.61427	2.32779	2.33851	2.35855	2.64377	5.73777	5.09825	4.02456	4.05121	4.1057	5.28724	211	chr3	52232099	52248343	2672	+	protein_coding	ALAS|ALAS3|ALASH|MIG4	P5421	5'-aminolevulinate synthase 1	NM_000688
690	ALDH1A1	NM_000689	1.01223	0.373949	3.59611e-06	0.0175457	0	1.07883e-05	0	3.27033e-06	0.0520065	0	0	0	0	0	0.0363788	0	216	chr9	75515578	75568233	2369	-	protein_coding	ALDC|ALDH-E1|ALDH1|ALDH11|MGC2318|PUMB1|RALDH1	P13344	aldehyde dehydrogenase 1 family member A1	NM_000689
691	ALDH2	NM_000690	0.999988	0.697401	6.76663e-05	5.00643e-05	0	9.9131e-05	0.000103865	2.19427e-08	7.64116e-05	7.3758e-05	0	6.70551e-05	7.2334e-05	0	5.15826e-05	5.30436e-05	217	chr12	112204691	112247789	2060	+	protein_coding	ALDH-E2|ALDHI|ALDM|MGC1806	P35587	aldehyde dehydrogenase 2 family (mitochondrial)	NM_000690
692	ALDH3A1	NM_000691	0.599168	0.00785428	1.58549	0.846518	1.73208	1.62273	1.37942	0.666249	1.00464	0.84887	2.32859	2.07047	1.60317	0.5855	0.999992	0.809303	218	chr17	19641298	19651746	1948	-	protein_coding	ALDH3|ALDHIII|MGC10406	P12592	aldehyde dehydrogenase 3 family member A1	NM_000691
693	ALDH1B1	NM_000692	1.00643	0.870707	3.66512	3.67436	3.72809	3.66791	3.59633	3.70737	3.71506	3.5977	12.292	11.652	11.1059	12.0446	12.0702	11.19	219	chr9	38392661	38398662	3070	+	protein_coding	ALDH5|ALDHX|MGC2230	P6807	aldehyde dehydrogenase 1 family member B1	NM_000692
694	ALDH1A3	NM_000693	0.662783	0.00926138	2.86604	2.27265	2.73337	2.97034	2.88453	2.36682	2.40204	2.01892	5.66834	6.80667	6.39036	4.15118	4.26148	3.08112	220	chr15	101419897	101456830	3607	+	protein_coding	ALDH1A6|ALDH6|RALDH3	P8155	aldehyde dehydrogenase 1 family member A3	NM_000693
695	ALDH3B1	NM_000694	0.712302	0.374648	2.73143	2.24199	2.84062	2.71356	2.63245	0.00268459	2.59065	2.84115	6.18202	5.53331	5.20566	0.000439283	4.99811	6.20734	221	chr11	67776017	67796749	3099	+	protein_coding	ALDH4|ALDH7|FLJ26433|FLJ34710	P17360	aldehyde dehydrogenase 3 family member B1	NM_000694
696	ALDH3B2	NM_000695	1.32408	0.0200195	2.94166	3.34665	3.06343	3.01323	2.72584	3.3074	3.27518	3.45121	7.38498	7.03698	5.62169	8.88686	8.63743	10.0057	222	chr11	67429633	67448685	2689	-	protein_coding	ALDH8	P33330	aldehyde dehydrogenase 3 family member B2	NM_000695
697	ALDH9A1	NM_000696	0.825189	0.00210934	4.62814	4.35093	4.63892	4.65404	4.5907	4.39635	4.27684	4.37678	23.9924	24.0606	23.1176	20.0282	18.2858	19.924	223	chr1	165631449	165667900	2500	-	protein_coding	ALDH4|ALDH7|ALDH9|E3|TMABADH	P1365	aldehyde dehydrogenase 9 family member A1	NM_000696
698	ALOX12	NM_000697	0.955936	0.643996	0.31299	0.247976	0.43844	0.256575	0.235189	0.458845	0.151514	0.107613	0.356403	0.193293	0.17731	0.373854	0.109693	0.0786867	239	chr17	6899384	6914055	2358	+	protein_coding	12-LOX|12S-LOX|LOG12	P25345	arachidonate 12-lipoxygenase	NM_000697
699	ALOX5	NM_000698	1.00006	0.376287	4.89885e-07	8.71742e-05	1.41677e-06	5.28842e-08	0	1.60311e-08	0.000261491	0	1.02966e-06	0	0	0	0.000177245	0	240	chr10	45869624	45941567	2644	+	protein_coding	5-LO|5-LOX|5LPG|LOG5|MGC163204	P5885	arachidonate 5-lipoxygenase	NM_000698
700	AMY2A	NM_000699	1	1	0	0	0	0	0	0	0	0	0	0	0	0	0	0	279	chr1	104159954	104168402	1679	+	protein_coding	AMY2|AMY2B|PA	P9333	amylase, alpha 2A (pancreatic)	NM_000699
701	ANXA1	NM_000700	0.881776	0.0819824	2.37968	2.19816	2.29141	2.37376	2.46841	2.19233	2.09304	2.30157	3.90859	4.16245	4.53853	3.56477	3.24793	3.95933	301	chr9	75766647	75785310	1536	+	protein_coding	ANX1|LPC1	P24461	annexin A1	NM_000700
702	ATP1A1	NM_000701	1.11864	0.0467645	8.50849	8.67024	8.56391	8.53626	8.42138	8.7222	8.69002	8.59551	378.692	368.426	342.167	420.693	409.887	388.652	476	chr1	116915795	116947396	4300	+	protein_coding	MGC3285|MGC51750	P29238	ATPase Na+/K+ transporting subunit alpha 1	NM_000701
703	ATP1A2	NM_000702	1.0026	0.896559	0.0490051	0.0527532	0.0474574	0.038071	0.0613915	0.0719969	0.084822	0	0.0336664	0.0264519	0.0435486	0.0510377	0.0600461	0	477	chr1	160085520	160113374	5457	+	protein_coding	FHM2|MGC59864|MHP2	P26408	ATPase Na+/K+ transporting subunit alpha 2	NM_000702
704	ATP4A	NM_000704	1.01661	0.37381	4.98254e-06	0.0237711	0	1.49476e-05	0	4.53116e-06	1.56133e-05	0.0701505	0	0	0	0	0	0.0504103	495	chr19	36041095	36054560	3559	-	protein_coding	ATP6A	P22547	ATPase H+/K+ transporting alpha subunit	NM_000704
705	ATP4B	NM_000705	0.953885	0.297	0.0973291	0.0292169	0.125764	8.01296e-05	0.16122	2.42905e-05	0.0859105	0	0.0915242	0	0.118382	0	0.0608283	0	496	chr13	114303122	114312513	1497	-	protein_coding	ATP6B	P1657	ATPase H+/K+ transporting beta subunit	NM_000705
706	AVPR1A	NM_000706	0.991579	0.149357	0.0172297	0.00502962	0.0110062	0.0263251	0.0143128	4.16052e-06	0.0150324	0	0.00772618	0.0182231	0.00999412	0	0.0103417	0	552	chr12	63536539	63546590	7831	-	protein_coding	AVPR1	P28356	arginine vasopressin receptor 1A	NM_000706
707	AVPR1B	NM_000707	1	1	0	0	0	0	0	0	0	0	0	0	0	0	0	0	553	chr1	206224283	206231482	1773	+	protein_coding	AVPR3	P10725	arginine vasopressin receptor 1B	NM_000707
708	BCKDHA	NM_000709	1.12643	0.044445	5.16195	5.3337	5.24679	5.1599	5.07399	5.39996	5.30811	5.29063	37.0933	34.577	32.7162	41.1623	38.421	38.4211	593	chr19	41903694	41930910	1913	+	protein_coding	BCKDE1A|FLJ45695|MSU|MSUD1|OVD1A	P7582	branched chain keto acid dehydrogenase E1, alpha polypeptide	NM_000709
709	BDKRB1	NM_000710	0.99577	0.946707	0.0828203	0.0767041	0.147271	0.000100941	0.097229	0.218775	0.000105436	0	0.107972	0	0.0698274	0.163453	0	0	623	chr14	96722547	96731100	1301	+	protein_coding	B1BKR|B1R|BKB1R|BKR1|BRADYB1	P12032	bradykinin receptor B1	NM_000710
710	BLVRA	NM_000712	0.908314	0.251502	5.17147	5.03274	5.33251	4.99521	5.16702	4.99878	5.03122	5.06739	39.4217	30.7389	34.9609	30.9259	31.5349	32.7709	644	chr7	43798272	43846941	1175	+	protein_coding	BLVR|BVR|BVRA	P21869	biliverdin reductase A	NM_000712
711	BLVRB	NM_000713	1.02829	0.735648	6.84769	6.88794	7.03824	6.79957	6.68217	6.81483	6.92603	6.92027	130.868	109.851	101.79	111.414	119.983	120.999	645	chr19	40953691	40971725	856	-	protein_coding	BVRB|FLR|MGC117413|SDR43U1	P32097	biliverdin reductase B	NM_000713
712	TSPO	NM_000714	1.14887	0.514798	3.99573	4.19595	4.43333	3.82673	3.59258	4.20251	3.94841	4.40148	20.67	13.12	11.0755	17.3856	14.3608	20.274	706	chr22	43547520	43559248	1362	+	protein_coding	BPBS|BZRP|DBI|IBP|MBR|PBR|PBS|PKBS|PTBR|mDRC|pk18	P9228	translocator protein	NM_000714
713	C4BPA	NM_000715	1	1	0	0	0	0	0	0	0	0	0	0	0	0	0	0	722	chr1	207277607	207318317	2243	+	protein_coding	C4BP|PRP	P35900	complement component 4 binding protein alpha	NM_000715
714	C4BPB	NM_000716	1	1	0	0	0	0	0	0	0	0	0	0	0	0	0	0	725	chr1	207262187	207273337	1578	+	protein_coding	C4BP	P24324	complement component 4 binding protein beta	NM_000716
715	CA4	NM_000717	1.19331	0.169559	2.84292	3.09789	2.86397	2.74703	2.91276	3.01668	2.90385	3.3374	6.30203	5.68276	6.53704	7.08241	6.44965	9.169	762	chr17	58227302	58236906	1154	+	protein_coding	CAIV|Car4|RP17	P11609	carbonic anhydrase 4	NM_000717
716	CACNA1B	NM_000718	1.03513	0.117809	0.000292568	0.0500999	0.000266929	0.000323341	0.000287435	0.0786749	0.0701128	0.000235764	0.000202513	0.000198135	0.000204327	0.0559144	0.0493754	0.000201923	774	chr9	140772241	141019076	12759	+	protein_coding	BIII|CACNL1A5|CACNN|Cav2.2	P4070	calcium voltage-gated channel subunit alpha1 B	NM_000718
717	CACNA1C	NM_000719	0.999265	0.3881	0.00250985	0.00144842	0.00237816	0.00116084	0.00398915	7.42973e-07	0.0020059	0.0023375	0.00166831	0.00078928	0.00277699	0	0.00136627	0.00166198	775	chr12	2162416	2807115	14909	+	protein_coding	CACH2|CACN2|CACNL1A1|CCHL1A1|CaV1.2|MGC120730|TS	P26922	calcium voltage-gated channel subunit alpha1 C	NM_000719
718	CACNA1D	NM_000720	0.938179	0.67993	0.732274	0.64021	1.07203	0.412273	0.632826	0.671344	0.587271	0.660573	1.10557	0.328265	0.551233	0.591531	0.499164	0.585689	776	chr3	53529076	53846492	7827	+	protein_coding	CACH3|CACN4|CACNL1A2|CCHL1A2|Cav1.3	P10056	calcium voltage-gated channel subunit alpha1 D	NM_000720
719	CACNA1E	NM_000721	1.00059	0.373851	1.72912e-07	0.0008449	0	5.18735e-07	0	0.00253268	5.41837e-07	0	0	0	0	0.0017487	0	0	777	chr1	181452686	181775921	15088	+	protein_coding	BII|CACH6|CACNL1A6|Cav2.3	P23057	calcium voltage-gated channel subunit alpha1 E	NM_000721
720	CACNA2D1	NM_000722	0.994733	0.373887	0.00762129	2.13163e-06	0.0227395	4.74514e-06	0	1.43842e-06	4.95647e-06	0	0.0159982	0	0	0	0	0	781	chr7	81575760	82073122	7864	-	protein_coding	CACNA2|CACNL2A|CCHL2A	P23791	calcium voltage-gated channel auxiliary subunit alpha2delta 1	NM_000722
721	CACNB1	NM_000723	1.2883	0.0390559	0.905866	1.27134	0.807279	0.825767	1.06944	1.14377	1.42146	1.23477	0.753202	0.767521	1.09978	1.20768	1.67076	1.36332	782	chr17	37329709	37353956	4297	-	protein_coding	CAB1|CACNLB1|CCHLB1|MGC41896	P10958	calcium voltage-gated channel auxiliary subunit beta 1	NM_000723
722	CACNB2	NM_000724	1	1	0	0	0	0	0	0	0	0	0	0	0	0	0	0	783	chr10	18429606	18830688	6036	+	protein_coding	CACNLB2|CAVB2|FLJ23743|MYSB	P14131	calcium voltage-gated channel auxiliary subunit beta 2	NM_000724
723	CACNB3	NM_000725	1.39553	0.0236383	3.40083	3.88164	3.47675	3.53077	3.16927	3.86221	4.0294	3.73849	10.1683	10.5035	8.0047	13.5231	15.2562	12.4371	784	chr12	49208215	49222726	3235	+	protein_coding	CACNLB3	P35517	calcium voltage-gated channel auxiliary subunit beta 3	NM_000725
724	CACNB4	NM_000726	0.99922	0.520673	0.00230224	0.00117622	4.06651e-05	0.00345249	0.00341089	0.0034432	4.96569e-05	3.31309e-05	2.96859e-05	0.0023592	0.00237415	0.00237837	3.20067e-05	2.61359e-05	785	chr2	152689286	152955593	8362	-	protein_coding	CAB4|CACNLB4|EA5|EIG9|EJM|EJM4|EJM6	P7919	calcium voltage-gated channel auxiliary subunit beta 4	NM_000726
725	CACNG1	NM_000727	0.992271	0.940304	0.453465	0.442272	0.662503	0.3225	0.350105	0.569124	0.27909	0.463806	0.584734	0.24869	0.275023	0.482847	0.21169	0.382517	786	chr17	65040652	65052911	1318	+	protein_coding	CACNLG	P21260	calcium voltage-gated channel auxiliary subunit gamma 1	NM_000727
726	CALCB	NM_000728	0.972705	0.374019	0.0399369	1.11374e-05	0	0.11664	0	7.51548e-06	2.58965e-05	0	0	0.0836343	0	0	0	0	797	chr11	15095146	15100177	1031	+	protein_coding	CALC2|CGRP-II|CGRP2|FLJ30166	P24561	calcitonin related polypeptide beta	NM_000728
727	CCK	NM_000729	1.01057	0.833908	0.0903713	0.10554	0.118077	0.000124885	0.148685	3.78581e-05	0.151683	0.159371	0.0857341	0	0.108708	0	0.110053	0.117995	885	chr3	42299318	42307662	1614	-	protein_coding	MGC117187	P27029	cholecystokinin	NM_000729
728	CCKAR	NM_000730	1	1	0	0	0	0	0	0	0	0	0	0	0	0	0	0	886	chr4	26483018	26492042	1682	-	protein_coding	CCK-A|CCK1-R|CCKRA	P31728	cholecystokinin A receptor	NM_000730
729	CD3D	NM_000732	1	1	0	0	0	0	0	0	0	0	0	0	0	0	0	0	915	chr11	118209789	118213459	741	-	protein_coding	CD3-DELTA|T3D	P823	CD3d molecule	NM_000732
730	CD3E	NM_000733	1	1	0	0	0	0	0	0	0	0	0	0	0	0	0	0	916	chr11	118175295	118186890	1513	+	protein_coding	FLJ18683|T3E|TCRE	P21596	CD3e molecule	NM_000733
731	CD247	NM_000734	0.983672	0.116923	0.0237569	6.61046e-06	0	0.0339843	0.0369946	4.46074e-06	1.53706e-05	0	0	0.0236039	0.0260224	0	0	0	919	chr1	167399877	167487847	1678	-	protein_coding	CD3-ZETA|CD3H|CD3Q|CD3Z|T3Z|TCRZ	P23280	CD247 molecule	NM_000734
732	CGA	NM_000735	1.10619	0.34651	1.56967	1.71526	1.61448	1.65752	1.42671	1.9266	1.592	1.60144	2.06925	2.14375	1.69021	2.79773	2.0036	2.05032	1081	chr6	87795216	87804865	844	-	protein_coding	CG-ALPHA|FSHA|GPHA1|GPHa|HCG|LHA|TSHA	P32513	glycoprotein hormones, alpha polypeptide	NM_000735
733	CGB	NM_000737	0.842903	0.222791	0.411158	0.164595	0.659867	0.256616	0.280538	0.324006	0.151538	0	0.581623	0.19331	0.214928	0.251326	0.109696	0	.	chr19	49526126	49527632	919	-	.	CGB3|CGB5|CGB7|CGB8|hCGB	P10640	.	NM_000737
734	CHRM1	NM_000738	0.967771	0.625082	0.146401	0.0991387	0.238254	0.0752397	0.12077	4.77682e-05	0.240779	0.0450758	0.180289	0.0530105	0.0874517	0	0.1805	0.0323234	1128	chr11	62676151	62689012	2823	-	protein_coding	HM1|M1|M1R|MGC30125	P22883	cholinergic receptor muscarinic 1	NM_000738
735	CHRM2	NM_000739	1	1	0	0	0	0	0	0	0	0	0	0	0	0	0	0	1129	chr7	136553399	136701771	3300	+	protein_coding	FLJ43243|HM2|MGC120006|MGC120007	P6271	cholinergic receptor muscarinic 2	NM_000739
736	CHRM3	NM_000740	1.02998	0.84426	1.99001	2.03262	1.53446	2.19161	2.15454	1.99884	1.93995	2.1508	1.90483	3.55127	3.45548	2.99215	2.82147	3.46535	1131	chr1	239792373	240072717	2745	+	protein_coding	HM3	P31623	cholinergic receptor muscarinic 3	NM_000740
737	CHRM4	NM_000741	1.12846	0.183467	0.0346759	0.209032	0.101475	0.000159262	0	0.28973	0.316523	0	0.0732947	0	0	0.22204	0.24397	0	1132	chr11	46406342	46408158	1817	-	protein_coding	HM4|M4R	P21025	cholinergic receptor muscarinic 4	NM_000741
738	CHRNA2	NM_000742	1.00001	0.991426	0.000738941	0.000750977	0.00221477	9.16191e-07	0	2.7773e-07	0.00225148	0	0.00155314	0	0	0	0.00153545	0	1135	chr8	27317278	27336813	4243	-	protein_coding	.	P3498	cholinergic receptor nicotinic alpha 2 subunit	NM_000742
739	CHRNA3	NM_000743	1.10663	0.196622	1.04641	1.19258	0.90833	1.01555	1.20013	1.19797	1.26532	1.11026	0.880476	1.01589	1.29889	1.29218	1.39666	1.16805	1136	chr15	78885395	78913637	3748	-	protein_coding	LNCR2|MGC104879|NACHRA3|PAOD2	.	cholinergic receptor nicotinic alpha 3 subunit	NM_000743
740	CHRNA4	NM_000744	1	1	0	0	0	0	0	0	0	0	0	0	0	0	0	0	1137	chr20	61974662	61992748	5891	-	protein_coding	BFNC|EBN|EBN1|FLJ95812|NACHR|NACHRA4|NACRA4	P13571	cholinergic receptor nicotinic alpha 4 subunit	NM_000744
741	CHRNA5	NM_000745	0.985831	0.72539	3.62181	3.60123	3.55201	3.64568	3.66522	3.51779	3.66203	3.62007	10.7655	11.4591	11.6977	10.438	11.5987	11.379	1138	chr15	78857862	78887611	2836	+	protein_coding	LNCR2	P5965	cholinergic receptor nicotinic alpha 5 subunit	NM_000745
742	CHRNA7	NM_000746	1	0.975853	5.29074e-05	5.41295e-05	7.46243e-05	8.40965e-05	0	8.37007e-05	6.92702e-08	7.86169e-05	5.25999e-05	5.68581e-05	0	5.75849e-05	0	5.65137e-05	1139	chr15	32322686	32462384	3346	+	protein_coding	CHRNA7-2|NACHRA7	P1366	cholinergic receptor nicotinic alpha 7 subunit	NM_000746
743	CHRNB1	NM_000747	1.04041	0.687399	1.01023	1.06738	0.796802	1.18931	1.01794	1.05903	0.943047	1.18952	0.740402	1.2742	1.02611	1.0818	0.917104	1.29007	1140	chr17	7348406	7360932	2437	+	protein_coding	ACHRB|CHRNB|CMS1D|CMS2A|FLJ57107|SCCMS	P33670	cholinergic receptor nicotinic beta 1 subunit	NM_000747
744	CHRNB2	NM_000748	0.950826	0.142439	0.320177	0.24743	0.388296	0.281711	0.288028	0.237153	0.282163	0.222299	0.31002	0.214207	0.221253	0.178273	0.214523	0.168443	1141	chr1	154540257	154552353	5718	+	protein_coding	EFNL3|nAChRB2	P11113	cholinergic receptor nicotinic beta 2 subunit	NM_000748
745	CHRNB3	NM_000749	1	1	0	0	0	0	0	0	0	0	0	0	0	0	0	0	1142	chr8	42552562	42592209	1953	+	protein_coding	.	P32840	cholinergic receptor nicotinic beta 3 subunit	NM_000749
746	CHRNB4	NM_000750	1.17185	0.105326	0.401465	0.630256	0.166473	0.552188	0.458305	0.564872	0.645863	0.6777	0.123238	0.46366	0.374387	0.478441	0.561611	0.604101	1143	chr15	78916636	78933587	2448	-	protein_coding	.	P32048	cholinergic receptor nicotinic beta 4 subunit	NM_000750
747	CHRND	NM_000751	0.999999	0.229289	4.70466e-06	2.68978e-06	3.91038e-06	5.50391e-06	4.69968e-06	1.38235e-09	4.10734e-06	3.9606e-06	2.77001e-06	3.69538e-06	3.27786e-06	0	2.75079e-06	2.87844e-06	1144	chr2	233390870	233401375	2931	+	protein_coding	ACHRD|CMS2A|FCCMS|SCCMS	.	cholinergic receptor nicotinic delta subunit	NM_000751
748	COMT	NM_000754	0.967332	0.834115	3.82751	3.77959	3.76585	3.50822	4.13829	3.57954	3.94324	3.79304	12.6455	10.3231	16.6245	10.9376	14.3105	12.9571	1312	chr22	19929263	19957498	2822	+	protein_coding	.	P107	catechol-O-methyltransferase	NM_000754
749	CRAT	NM_000755	0.893022	0.453114	2.30538	2.14214	2.56444	2.36858	1.90662	2.1233	2.12807	2.1745	4.9301	4.14438	2.75238	3.35156	3.35288	3.54124	1384	chr9	131857073	131873070	2865	-	protein_coding	CAT1	P10697	carnitine O-acetyltransferase	NM_000755
750	CRH	NM_000756	1.00595	0.848914	0.056097	0.0646543	0	0.0797142	0.086973	0.101688	0.0901419	0	0	0.05633	0.0622382	0.0728576	0.0639327	0	1392	chr8	67088612	67090846	1434	-	protein_coding	CRF	P24988	corticotropin releasing hormone	NM_000756
751	CSF1	NM_000757	0.908105	0.0991025	0.3	0.160931	0.384972	0.289888	0.220395	0.243778	0.104261	0.130919	0.306945	0.221168	0.16528	0.183714	0.0741479	0.0962787	1435	chr1	110453233	110473616	4567	+	protein_coding	MCSF|MGC31930	P7852	colony stimulating factor 1	NM_000757
752	CSF2	NM_000758	1	1	0	0	0	0	0	0	0	0	0	0	0	0	0	0	1437	chr5	131409485	131411863	785	+	protein_coding	GMCSF|MGC131935|MGC138897	P32376	colony stimulating factor 2	NM_000758
753	CSF3	NM_000759	1	1	0	0	0	0	0	0	0	0	0	0	0	0	0	0	1440	chr17	38171614	38174066	1583	+	protein_coding	C17orf33|CSF3OS|GCSF|MGC45931	P12449	colony stimulating factor 3	NM_000759
754	CSF3R	NM_000760	1.01222	0.752035	0.0317488	0.0492654	0	0.0611767	0.0334198	2.91196e-05	6.34973e-05	0.142936	0	0.0429329	0.0234851	9.42191e-06	6.99201e-06	0.105166	1441	chr1	36931644	36948915	2989	-	protein_coding	CD114|GCSFR	P29229	colony stimulating factor 3 receptor	NM_000760
755	CYP1A2	NM_000761	0.908695	0.0269244	0.204248	0.0661171	0.215128	0.252363	0.143125	0.0436461	0.113162	0.0403653	0.161497	0.190022	0.104449	0.0305943	0.0808781	0.0289468	1544	chr15	75041184	75048941	3127	+	protein_coding	CP12|P3-450|P450(PA)	P3558	cytochrome P450 family 1 subfamily A member 2	NM_000761
756	CYP2A6	NM_000762	1.07113	0.555698	0.126134	0.225269	0.0532085	0.123887	0.197688	0.487862	0.0718176	0.0752984	0.0378975	0.0888952	0.147058	0.40181	0.050447	0.054449	1548	chr19	41349443	41356352	1764	-	protein_coding	CPA6|CYP2A|CYP2A3|P450C2A|P450PB	P18207	cytochrome P450 family 2 subfamily A member 6	NM_000762
757	CYP2A7	NM_000764	0.999997	0.492952	9.24622e-05	8.85899e-05	8.83862e-05	9.30816e-05	9.59186e-05	7.9955e-05	8.99425e-05	9.58721e-05	6.22989e-05	6.29233e-05	6.68081e-05	5.49958e-05	6.07244e-05	6.89024e-05	1549	chr19	41381344	41388657	3013	-	protein_coding	CPA7|CPAD|CYP2A|CYPIIA7|P450-IIA4	P8151	cytochrome P450 family 2 subfamily A member 7	NM_000764
758	CYP3A7	NM_000765	1.03182	0.373851	9.41276e-06	0.0451996	0	2.82381e-05	0	0.131533	2.94957e-05	0	0	0	0	0.0952677	0	0	1551	chr7	99302660	99332823	2082	-	protein_coding	CP37|P450-HFLA	P15460	cytochrome P450 family 3 subfamily A member 7	NM_000765
759	CYP2A13	NM_000766	1	1	0	0	0	0	0	0	0	0	0	0	0	0	0	0	1553	chr19	41594356	41602100	1760	+	protein_coding	CPAD|CYP2A	P19651	cytochrome P450 family 2 subfamily A member 13	NM_000766
760	CYP2B6	NM_000767	0.954936	0.0272431	0.0665426	1.88172e-05	0.0582398	0.10255	0.0380827	1.26979e-05	4.37535e-05	0	0.04144	0.073132	0.0268015	0	0	0	1555	chr19	41497204	41524301	3052	+	protein_coding	CPB6|CYP2B|CYP2B7|CYP2B7P|CYPIIB6|IIB1|P450	P919	cytochrome P450 family 2 subfamily B member 6	NM_000767
761	CYP2C19	NM_000769	1	1	0	0	0	0	0	0	0	0	0	0	0	0	0	0	1557	chr10	96522438	96612962	1789	+	protein_coding	CPCJ|CYP2C|P450C2C|P450IIC19	P12611	cytochrome P450 family 2 subfamily C member 19	NM_000769
762	CYP2C8	NM_000770	1.06408	0.591141	0.0570773	0.146678	9.09679e-07	0.164808	7.32744e-05	0.000106731	0.401608	0	6.22544e-05	0.120192	6.86618e-05	4.63176e-05	0.319425	6.57849e-05	1558	chr10	96796529	96829254	2287	-	protein_coding	CPC8|MP-12/MP-20	P8163	cytochrome P450 family 2 subfamily C member 8	NM_000770
763	CYP2C9	NM_000771	1.04778	0.373949	1.40745e-05	0.0673551	0	4.22231e-05	0	1.27994e-05	0.193296	0	0	0	0	0	0.142505	0	1559	chr10	96698415	96749148	1861	+	protein_coding	CPC9|CYP2C|CYP2C10|CYPIIC9|MGC149605|MGC88320|P450IIC9	P26261	cytochrome P450 family 2 subfamily C member 9	NM_000771
764	CYP2C18	NM_000772	1	1	0	0	0	0	0	0	0	0	0	0	0	0	0	0	1562	chr10	96443251	96495947	2545	+	protein_coding	CPCI|CYP2C|CYP2C17|DKFZp686I24235|P450-6B/29C|P450IIC17	P14119	cytochrome P450 family 2 subfamily C member 18	NM_000772
765	CYP2E1	NM_000773	1.10869	0.643476	0.373287	0.522138	0.358007	0.308819	0.449487	0.985976	0.345821	0.0795906	0.282949	0.236929	0.365984	0.979501	0.268908	0.0580912	1571	chr10	135340867	135352620	1667	+	protein_coding	CPE1|CYP2E|P450-J|P450C2E	P9810	cytochrome P450 family 2 subfamily E member 1	NM_000773
766	CYP2F1	NM_000774	1.07347	0.058165	0.532348	0.634632	0.484549	0.600237	0.509674	0.634996	0.66499	0.603251	0.400875	0.513039	0.424244	0.552013	0.582288	0.52351	1572	chr19	41620353	41634281	1826	+	protein_coding	C2F1|CYP2F|MGC126121	P24325	cytochrome P450 family 2 subfamily F member 1	NM_000774
767	CYP2J2	NM_000775	0.791492	0.0193965	1.48057	1.14321	1.3606	1.4702	1.60086	1.23654	1.10427	1.08403	1.57331	1.76205	2.03504	1.35408	1.1428	1.12995	1573	chr1	60358980	60392423	1857	-	protein_coding	CPJ2	P31435	cytochrome P450 family 2 subfamily J member 2	NM_000775
768	CYP3A5	NM_000777	1	0.373806	2.11942e-10	9.83702e-07	0	6.35826e-10	0	1.92742e-10	6.64142e-10	2.95025e-06	0	0	0	0	0	2.14339e-06	1577	chr7	99245812	99277649	2804	-	protein_coding	CP35|CYPIIIA5|DKFZp686L16231|FLJ31317|P450PCN3|PCN3	.	cytochrome P450 family 3 subfamily A member 5	NM_000777
769	CYP4A11	NM_000778	1.03583	0.390328	0.0309229	0.0817166	0	7.11605e-05	0.0907819	2.15716e-05	0.094443	0.146866	0	0	0.0650482	0	0.0670978	0.108224	1579	chr1	47394846	47407156	2552	-	protein_coding	CP4Y|CYP4A2|CYP4AII	P35200	cytochrome P450 family 4 subfamily A member 11	NM_000778
770	CYP4B1	NM_000779	1.2361	0.443944	0.365915	0.671714	0.019774	0.262288	0.725012	1.00737	0.00121309	0.821963	0.0142705	0.197649	0.653537	1.00901	0.000278536	0.773002	1580	chr1	47264670	47285021	2310	+	protein_coding	CYPIVB1|P-450HP	P1409	cytochrome P450 family 4 subfamily B member 1	NM_000779
771	CYP7A1	NM_000780	1	1	0	0	0	0	0	0	0	0	0	0	0	0	0	0	1581	chr8	59402737	59412720	2875	-	protein_coding	CP7A|CYP7|CYPVII|MGC126826|MGC138389	P2393	cytochrome P450 family 7 subfamily A member 1	NM_000780
772	CYP11A1	NM_000781	0.974752	0.122797	0.0369039	1.03861e-05	0.0479168	2.312e-05	0.0620419	7.00854e-06	2.41497e-05	0	0.0339761	0	0.0440135	0	0	0	1583	chr15	74630103	74660081	2428	-	protein_coding	CYP11A|P450SCC	P1172	cytochrome P450 family 11 subfamily A member 1	NM_000781
773	CYP24A1	NM_000782	0.859732	0.242407	1.57589	1.35785	1.45804	1.81889	1.41585	1.36712	1.4779	1.21668	1.75347	2.51693	1.6699	1.57694	1.77583	1.33582	1591	chr20	52769988	52790516	3266	-	protein_coding	CP24|CYP24|MGC126273|MGC126274|P450-CC24	P17274	cytochrome P450 family 24 subfamily A member 1	NM_000782
774	CYP26A1	NM_000783	0.901151	0.40693	0.864882	0.714723	0.718324	1.13797	0.693852	0.643284	0.768091	0.729973	0.647814	1.19544	0.618317	0.560814	0.698893	0.664294	1592	chr10	94833232	94837641	2479	+	protein_coding	CP26|CYP26|P450RAI|P450RAI1	P35842	cytochrome P450 family 26 subfamily A member 1	NM_000783
775	CYP27A1	NM_000784	0.994675	0.873805	0.0657986	0.0580954	0	0.0935132	0.101687	0.0606792	8.14829e-05	0.111376	0	0.0664315	0.0731373	0.0428346	0	0.0811503	1593	chr2	219646472	219680016	2293	+	protein_coding	CP27|CTX|CYP27	P23095	cytochrome P450 family 27 subfamily A member 1	NM_000784
776	CYP27B1	NM_000785	1.03542	0.732597	1.14169	1.1919	1.09338	0.962035	1.34334	1.33945	1.10107	1.12296	1.13794	0.942359	1.53882	1.52832	1.13857	1.18744	1594	chr12	58156117	58160976	2487	-	protein_coding	CP2B|CYP1|CYP1alpha|CYP27B|P450c1|PDDR|VDD1|VDDR|VDDRI|VDR	P35478	cytochrome P450 family 27 subfamily B member 1	NM_000785
777	CYP51A1	NM_000786	1.06135	0.345228	5.49012	5.57602	5.41683	5.61908	5.42522	5.49876	5.57031	5.65475	41.8605	47.9132	42.0099	44.1495	46.2759	49.7377	1595	chr7	91741463	91764059	3288	-	protein_coding	CP51|CYP51|CYPL1|LDM|P450-14DM|P450L1	P1007	cytochrome P450 family 51 subfamily A member 1	NM_000786
778	DBH	NM_000787	1.04851	0.243489	0.0412975	0.109635	0	0.0391027	0.0835772	0.189341	0.0442975	0.0914533	0	0.0271574	0.0597417	0.139979	0.0308235	0.0662483	1621	chr9	136501485	136524466	2760	+	protein_coding	DBM	P5512	dopamine beta-hydroxylase	NM_000787
779	DCK	NM_000788	0.999257	0.992436	3.75738	3.7563	3.58515	3.75406	3.9142	3.6602	3.77927	3.82448	11.0399	12.4302	14.0893	11.6245	12.6645	13.2631	1633	chr4	71859265	71896629	2605	+	protein_coding	MGC117410|MGC138632	P30221	deoxycytidine kinase	NM_000788
780	ACE	NM_000789	1.0643	0.250646	0.315675	0.405582	0.303344	0.387388	0.25309	0.499075	0.396574	0.315199	0.235087	0.306158	0.19204	0.412643	0.314402	0.246637	1636	chr17	61554422	61575741	5219	+	protein_coding	ACE1|CD143|DCP|DCP1|MGC26566|MVCD3	P247	angiotensin I converting enzyme	NM_000789
781	DDC	NM_000790	1	1	0	0	0	0	0	0	0	0	0	0	0	0	0	0	1644	chr7	50526134	50633154	2487	-	protein_coding	AADC	P7224	dopa decarboxylase	NM_000790
782	DHFR	NM_000791	0.893858	0.0154665	5.36439	5.2025	5.28902	5.39826	5.40302	5.22167	5.18861	5.19702	38.2247	40.9728	41.3519	36.2598	35.2841	35.9482	1719	chr5	79922045	79950800	3917	-	protein_coding	DHFRP1|DYR	P2967	dihydrofolate reductase	NM_000791
783	DIO1	NM_000792	0.744605	0.0462263	0.481937	0.0564833	0.400544	0.704145	0.311117	0.000138985	0.000444855	0.162698	0.321203	0.626572	0.240964	1.54555e-05	2.93061e-05	0.120933	1733	chr1	54359861	54376759	1668	+	protein_coding	5DI|MGC130050|MGC130051|TXDI1	P8548	deiodinase, iodothyronine type I	NM_000792
784	DIO2	NM_000793	0.907862	0.374132	0.139536	7.99335e-05	0	0.383663	2.43922e-06	2.72097e-05	0.000212582	0	0	0.303255	1.38854e-05	0	8.03804e-05	0	1734	chr14	80663868	80697397	6610	-	protein_coding	5DII|D2|SelY|TXDI2	P31896	deiodinase, iodothyronine, type II	NM_000793
785	DRD1	NM_000794	0.995628	0.950452	0.475613	0.469292	0.43535	0.591329	0.392486	0.39067	0.608908	0.397456	0.353722	0.503964	0.313057	0.310377	0.52226	0.320287	1812	chr5	174867675	174871163	3373	-	protein_coding	DADR|DRD1A	P28778	dopamine receptor D1	NM_000794
786	DRD2	NM_000795	1.00016	0.147027	0.000126641	0.000354235	0	0.000379891	0	0.000344667	0.000365183	0.000352854	0	0.000257852	0	0.000237395	0.000247599	0.000252322	1813	chr11	113280317	113346001	2699	-	protein_coding	D2DR|D2R	P1553	dopamine receptor D2	NM_000795
787	DRD3	NM_000796	1	1	0	0	0	0	0	0	0	0	0	0	0	0	0	0	1814	chr3	113847499	113918254	1726	-	protein_coding	D3DR|ETM1|FET1|MGC149204|MGC149205	P8342	dopamine receptor D3	NM_000796
788	DRD4	NM_000797	0.960578	0.80458	0.544412	0.486387	0.492988	0.311684	0.788072	0.108019	0.690845	0.595332	0.409013	0.239276	0.72742	0.077405	0.611032	0.514947	1815	chr11	637305	640705	1362	+	protein_coding	D4DR	P19733	dopamine receptor D4	NM_000797
789	DRD5	NM_000798	1.0365	0.373949	1.07471e-05	0.0517254	0	3.22412e-05	0	9.77352e-06	0.149916	0	0	0	0	0	0.108785	0	1816	chr4	9783258	9785633	2376	+	protein_coding	DBDR|DRD1B|DRD1L2|MGC10601	P14369	dopamine receptor D5	NM_000798
790	EPO	NM_000799	0.950728	0.625848	0.177231	0.104335	0.0734434	0.000182317	0.421999	0.110792	0.098257	0.10393	0.0525879	0	0.340095	0.0796135	0.0698143	0.0756787	2056	chr7	100318423	100321323	1330	+	protein_coding	EP|MGC138142|MVCD2	P16978	erythropoietin	NM_000799
791	FGF1	NM_000800	1	1	0	0	0	0	0	0	0	0	0	0	0	0	0	0	2246	chr5	141971743	142077635	4698	-	protein_coding	AFGF|ECGF|ECGF-beta|ECGFA|ECGFB|FGF-alpha|FGFA|GLIO703|HBGF1	P24106	fibroblast growth factor 1	NM_000800
792	FKBP1A	NM_000801	0.96404	0.488424	7.16904	7.1162	7.22882	7.19364	7.08052	7.0204	7.20667	7.11553	149.494	144.671	134.477	128.629	145.961	138.685	2280	chr20	1349621	1373816	2162	-	protein_coding	FKBP-12|FKBP1|FKBP12|FKBP12C|PKC12|PKCI2|PPIASE	P30593	FK506 binding protein 1A	NM_000801
793	FOLR1	NM_000802	0.915243	0.766462	2.9495	2.82172	2.68317	2.9006	3.2148	1.72499	3.16627	3.1582	5.44215	6.4352	8.29166	2.30033	7.93886	7.98168	2348	chr11	71900602	71907367	1426	+	protein_coding	FBP|FOLR	P11564	folate receptor 1 (adult)	NM_000802
794	FOLR2	NM_000803	1	1	0	0	0	0	0	0	0	0	0	0	0	0	0	0	2350	chr11	71927819	71932994	1287	+	protein_coding	BETA-HFR|FBP/PL-1|FR-BETA|FR-P3	P31526	folate receptor beta	NM_000803
795	FOLR3	NM_000804	1	1	0	0	0	0	0	0	0	0	0	0	0	0	0	0	2352	chr11	71846771	71850934	845	+	protein_coding	FR-G|FR-gamma|gamma-hFR	P21233	folate receptor 3 (gamma)	NM_000804
796	GAST	NM_000805	1	1	0	0	0	0	0	0	0	0	0	0	0	0	0	0	2520	chr17	39868578	39872221	470	+	protein_coding	GAS	P32311	gastrin	NM_000805
797	GABRA1	NM_000806	1	0.373887	2.40771e-07	6.71707e-11	0	1.49526e-10	7.22162e-07	4.53269e-11	1.56185e-10	0	0	0	5.04058e-07	0	0	0	2554	chr5	161274197	161326965	5238	+	protein_coding	ECA4|EJM|EJM5	P23774	gamma-aminobutyric acid type A receptor alpha1 subunit	NM_000806
798	GABRA2	NM_000807	0.981065	0.119316	0.0275875	7.69904e-06	0.037577	0.0447858	0	5.19531e-06	1.79018e-05	0	0.0265579	0.0312446	0	0	0	0	2555	chr4	46251581	46392056	2595	-	protein_coding	FLJ97076	P29911	gamma-aminobutyric acid type A receptor alpha2 subunit	NM_000807
799	GABRA3	NM_000808	1	1	0	0	0	0	0	0	0	0	0	0	0	0	0	0	2556	chrX	151335634	151619831	2785	-	protein_coding	MGC33793	P9293	gamma-aminobutyric acid type A receptor alpha3 subunit	NM_000808
800	GABRA4	NM_000809	1	1	0	0	0	0	0	0	0	0	0	0	0	0	0	0	2557	chr4	46920917	46996424	12072	-	protein_coding	.	P27133	gamma-aminobutyric acid type A receptor alpha4 subunit	NM_000809
801	GABRA5	NM_000810	1	1	0	0	0	0	0	0	0	0	0	0	0	0	0	0	2558	chr15	27111866	27194357	3157	+	protein_coding	.	P31140	gamma-aminobutyric acid type A receptor alpha5 subunit	NM_000810
802	GABRA6	NM_000811	1	1	0	0	0	0	0	0	0	0	0	0	0	0	0	0	2559	chr5	161112658	161129598	2519	+	protein_coding	MGC116903|MGC116904	P23945	gamma-aminobutyric acid type A receptor alpha6 subunit	NM_000811
803	GABRB1	NM_000812	1	1	0	0	0	0	0	0	0	0	0	0	0	0	0	0	2560	chr4	47033295	47428447	2211	+	protein_coding	.	P4446	gamma-aminobutyric acid type A receptor beta1 subunit	NM_000812
804	GABRB2	NM_000813	0.991952	0.373887	0.0116609	3.26369e-06	0.0346965	7.26517e-06	0	2.20234e-06	7.58872e-06	0	0.0244962	0	0	0	0	0	2561	chr5	160715436	160975130	7409	-	protein_coding	MGC119386|MGC119388|MGC119389	P4453	gamma-aminobutyric acid type A receptor beta2 subunit	NM_000813
805	GABRB3	NM_000814	0.999998	0.373887	2.80295e-06	7.92113e-10	8.40706e-06	1.76329e-09	0	5.34517e-10	1.84182e-09	0	5.94412e-06	0	0	0	0	0	2562	chr15	26788694	27018935	7536	-	protein_coding	ECA5|MGC9051	P18436	gamma-aminobutyric acid type A receptor beta3 subunit	NM_000814
806	GABRD	NM_000815	1.01329	0.910613	0.90504	0.924081	1.13624	0.949964	0.57327	0.954431	0.906142	0.91118	1.20187	0.926903	0.488584	0.936317	0.869058	0.887702	2563	chr1	1950768	1962192	1925	+	protein_coding	EIG10|EJM7|GEFSP5|MGC45284	P19737	gamma-aminobutyric acid type A receptor delta subunit	NM_000815
807	GABRG2	NM_000816	1.01109	0.515384	0.0198193	0.0357246	0.058626	3.47299e-05	0	0.0260902	0.0239406	0.0569067	0.0417161	0	0	0.0181865	0.0165304	0.0407584	2566	chr5	161494648	161582545	4077	+	protein_coding	CAE2|ECA2|GEFSP3	P2088	gamma-aminobutyric acid type A receptor gamma2 subunit	NM_000816
808	GAD1	NM_000817	1.15959	0.185451	0.668042	0.881651	0.742864	0.780732	0.459693	0.939282	0.690204	0.997375	0.676076	0.714043	0.375807	0.916205	0.609701	1.00339	2571	chr2	171673200	171717659	3665	+	protein_coding	FLJ45882|GAD|SCP	P32995	glutamate decarboxylase 1	NM_000817
809	GAD2	NM_000818	1	1	0	0	0	0	0	0	0	0	0	0	0	0	0	0	2572	chr10	26505236	26593491	2824	+	protein_coding	GAD65|MGC161605|MGC161607	P19154	glutamate decarboxylase 2	NM_000818
810	GART	NM_000819	0.938098	0.229842	4.8238	4.73161	4.85491	4.88681	4.7246	4.78875	4.75592	4.64633	28.0304	28.4463	25.4638	26.6014	25.8844	24.2238	2618	chr21	34876238	34915198	4856	-	protein_coding	AIRS|GARS|GARTF|MGC47764|PAIS|PGFT|PRGS	P6292	phosphoribosylglycinamide formyltransferase, phosphoribosylglycinamide synthetase, phosphoribosylaminoimidazole synthetase	NM_000819
811	GAS6	NM_000820	1.0632	0.381176	2.59292	2.68133	2.58443	2.66814	2.52247	2.62075	2.58357	2.82751	5.01498	5.32952	4.75048	5.14281	4.96759	6.14134	2621	chr13	114523522	114567076	2535	-	protein_coding	AXLLG|AXSF|DKFZp666G247|FLJ34709	P20084	growth arrest specific 6	NM_000820
812	GGCX	NM_000821	0.9029	0.170705	3.03633	2.88897	3.00876	3.10096	2.997	3.0139	2.71846	2.91897	7.07215	7.54355	6.99013	7.06689	5.5503	6.61254	2677	chr2	85771978	85788657	7462	-	protein_coding	FLJ26629|VKCFD1	P20050	gamma-glutamyl carboxylase	NM_000821
813	GHRHR	NM_000823	1	1	0	0	0	0	0	0	0	0	0	0	0	0	0	0	2692	chr7	31003636	31019146	1607	+	protein_coding	GHRFR|GRFR|IGHD1B	P9214	growth hormone releasing hormone receptor	NM_000823
814	GLRB	NM_000824	1.19002	0.322088	0.820212	1.0712	0.899181	1.11988	0.331934	0.885194	1.15105	1.16077	0.868264	1.16761	0.259231	0.845563	1.21469	1.24448	2743	chr4	157997277	158093242	3214	+	protein_coding	.	P16017	glycine receptor beta	NM_000824
815	GNRH1	NM_000825	1.04368	0.818843	0.485781	0.547464	0.183691	0.281772	0.88718	0.35162	0.545588	0.721535	0.136753	0.213906	0.850272	0.275382	0.456877	0.653636	2796	chr8	25276774	25282556	1281	-	protein_coding	GNRH|GRH|LHRH|LNRH	P22976	gonadotropin releasing hormone 1	NM_000825
816	GRIA2	NM_000826	0.929255	0.470532	0.185059	0.0792053	0.165062	0.366596	9.8562e-05	0.000124962	0.000188292	0.225387	0.121796	0.287862	9.187e-05	5.02387e-05	6.25271e-06	0.170655	2891	chr4	158141736	158287226	5927	+	protein_coding	GLUR2|GLURB|GluA2|GluR-K2|HBGR2	P9132	glutamate ionotropic receptor AMPA type subunit 2	NM_000826
817	GRIA1	NM_000827	1	1	0	0	0	0	0	0	0	0	0	0	0	0	0	0	2890	chr5	152870084	153193429	6077	+	protein_coding	GLUH1|GLUR1|GLURA|GluA1|HBGR1|MGC133252	P15244	glutamate ionotropic receptor AMPA type subunit 1	NM_000827
818	GRIA3	NM_000828	1.006	0.373851	1.77498e-06	0.00863622	0	5.32492e-06	0	0.0257496	5.56207e-06	0	0	0	0	0.0179532	0	0	2892	chrX	122318096	122624766	5726	+	protein_coding	GLUR-C|GLUR-K3|GLUR3|GLURC|GluA3|MRX94	P8352	glutamate ionotropic receptor AMPA type subunit 3	NM_000828
819	GRIA4	NM_000829	1.00016	0.373948	4.50844e-08	0.000223683	0	1.35253e-07	0	4.10001e-08	0.000670903	0	0	0	0	0	0.000455945	0	2893	chr11	105480800	105852819	7694	+	protein_coding	GLUR4|GLUR4C|GLURD|GluA4	P3217	glutamate ionotropic receptor AMPA type subunit 4	NM_000829
820	GRIK1	NM_000830	1	1	0	0	0	0	0	0	0	0	0	0	0	0	0	0	2897	chr21	30909254	31312282	3684	-	protein_coding	EAA3|EEA3|GLR5|GLUR5	P14606	glutamate ionotropic receptor kainate type subunit 1	NM_000830
821	GRIK3	NM_000831	0.99119	0.81438	0.558202	0.545435	0.548162	0.551167	0.575125	0.440913	0.595011	0.594962	0.46404	0.462563	0.490349	0.356747	0.507515	0.514668	2899	chr1	37261128	37499844	9219	-	protein_coding	EAA5|GLR7|GLUR7|GluR7a	P2493	glutamate ionotropic receptor kainate type subunit 3	NM_000831
822	GRIN1	NM_000832	1.0523	0.529817	0.470007	0.543558	0.56205	0.551936	0.278496	0.634885	0.561147	0.426998	0.478153	0.463431	0.213272	0.551943	0.472675	0.347766	2902	chr9	140033609	140063214	5434	+	protein_coding	NMDA1|NMDAR1|NR1	P24773	glutamate ionotropic receptor NMDA type subunit 1	NM_000832
823	GRIN2A	NM_000833	0.999985	0.535287	4.30712e-05	2.21253e-05	6.11765e-05	6.80361e-05	0	1.23014e-08	4.23877e-08	6.63202e-05	4.31283e-05	4.59836e-05	0	0	0	4.76864e-05	2903	chr16	9847262	10276611	14106	-	protein_coding	NMDAR2A|NR2A	P7924	glutamate ionotropic receptor NMDA type subunit 2A	NM_000833
824	GRIN2B	NM_000834	1	1	0	0	0	0	0	0	0	0	0	0	0	0	0	0	2904	chr12	13714410	14133022	5941	-	protein_coding	MGC142178|MGC142180|NMDAR2B|NR2B|hNR3	P33340	glutamate receptor, ionotropic, N-methyl D-aspartate 2B	NM_000834
825	GRIN2C	NM_000835	0.982154	0.345051	0.269753	0.243774	0.261787	0.270415	0.277018	0.208464	0.232378	0.289283	0.199858	0.2048	0.211956	0.155105	0.173478	0.224135	2905	chr17	72838162	72856966	5138	-	protein_coding	NMDAR2C|NR2C	P3924	glutamate ionotropic receptor NMDA type subunit 2C	NM_000835
826	GRIN2D	NM_000836	1.37123	0.000434969	1.23306	1.68853	1.19981	1.27198	1.22645	1.66834	1.64311	1.75188	1.30235	1.40677	1.34146	2.17536	2.11279	2.38405	2906	chr19	48898132	48948188	5093	+	protein_coding	EB11|NMDAR2D|NR2D	P2021	glutamate ionotropic receptor NMDA type subunit 2D	NM_000836
827	GRINA	NM_000837	1.13903	0.0871103	5.42977	5.61758	5.37411	5.3368	5.56762	5.70178	5.59166	5.55524	40.6103	39.2156	46.4709	50.9731	46.9814	46.359	2907	chr8	145064226	145067583	1856	+	protein_coding	HNRGW|LFG1|MGC99687|NMDARA1|TMBIM3	P1570	glutamate ionotropic receptor NMDA type subunit associated protein 1	NM_000837
828	GRM2	NM_000839	0.986609	0.594384	0.0447539	0.0253045	0.0584934	4.39996e-05	0.0746607	1.3338e-05	4.59591e-05	0.0745634	0.0416249	0	0.0531979	0	0	0.0536873	2912	chr3	51741081	51752625	3355	+	protein_coding	GLUR2|GPRC1B|MGLUR2|mGlu2	P2887	glutamate metabotropic receptor 2	NM_000839
829	GRM3	NM_000840	1.00709	0.479927	0.00900337	0.019192	0	1.75167e-05	0.0268261	5.30994e-06	0.0280733	0.0293073	0	0	0.0188068	0	0.0194368	0.020835	2913	chr7	86273230	86494192	4260	+	protein_coding	GLUR3|GPRC1C|MGLUR3|mGlu3	P3965	glutamate metabotropic receptor 3	NM_000840
830	GRM4	NM_000841	0.975359	0.684284	0.852813	0.816819	0.880896	0.699403	0.965475	0.797526	0.867533	0.783996	0.84452	0.620021	0.953634	0.736857	0.819939	0.728017	2914	chr6	33986420	34123399	8394	-	protein_coding	GPRC1D|MGC177594|MGLUR4|mGlu4	P23981	glutamate metabotropic receptor 4	NM_000841
831	GRM5	NM_000842	0.9998	0.373887	0.000288006	8.07846e-08	0.000863667	1.79832e-07	0	5.45135e-08	1.8784e-07	0	0.000606222	0	0	0	0	0	2915	chr11	88237744	88796846	8053	-	protein_coding	GPRC1E|MGLUR5|mGlu5	P33701	glutamate metabotropic receptor 5	NM_000842
832	GRM6	NM_000843	1	1	0	0	0	0	0	0	0	0	0	0	0	0	0	0	2916	chr5	178405330	178422124	6141	-	protein_coding	CSNB1B|DKFZp686H1993|GPRC1F|MGLUR6|mGlu6	P34903	glutamate metabotropic receptor 6	NM_000843
833	GRM7	NM_000844	1	1	0	0	0	0	0	0	0	0	0	0	0	0	0	0	2917	chr3	6902802	7783218	4239	+	protein_coding	FLJ40498|GLUR7|GPRC1G|MGLU7|MGLUR7	P29319	glutamate metabotropic receptor 7	NM_000844
834	GRM8	NM_000845	1.00093	0.931953	0.00976198	0.0111005	0	0.02909	0	3.87399e-06	0.0330448	0	0	0.0201628	0	0	0.0229335	0	2918	chr7	126078652	126892428	4178	-	protein_coding	FLJ41058|GLUR8|GPRC1H|MGC126724|MGLUR8|mGlu8	P9934	glutamate metabotropic receptor 8	NM_000845
835	GSTA2	NM_000846	0.948713	0.527249	0.177812	0.101855	0.0748167	0.0885142	0.352758	5.48382e-05	0.193174	0.10587	0.0535931	0.0626769	0.277276	0	0.142272	0.0771339	2939	chr6	52614885	52628361	1309	-	protein_coding	GST2|GSTA2-2|GTA2|GTH2|MGC10525	P27767	glutathione S-transferase alpha 2	NM_000846
836	GSTA3	NM_000847	1	1	0	0	0	0	0	0	0	0	0	0	0	0	0	0	2940	chr6	52761439	52774496	913	-	protein_coding	GSTA3-3|GTA3|MGC22232	P21632	glutathione S-transferase alpha 3	NM_000847
837	GSTM2	NM_000848	1.0222	0.572776	0.18551	0.21719	0.161217	0.188889	0.206069	0.124579	0.295985	0.225878	0.118859	0.138861	0.153751	0.0899461	0.226312	0.17119	2946	chr1	110210644	110226619	2018	+	protein_coding	GST4|GSTM|GSTM2-2|GTHMUS|MGC117303	P458	glutathione S-transferase mu 2 (muscle)	NM_000848
838	GSTM3	NM_000849	0.768698	0.0334852	4.35907	3.97956	4.50324	4.34243	4.21725	3.84316	4.12647	3.95484	21.7465	19.1936	17.6171	13.3303	16.3798	14.6192	2947	chr1	110276554	110283660	4127	-	protein_coding	GST5|GSTB|GSTM3-3|GTM3|MGC3310|MGC3704	P21914	glutathione S-transferase mu 3 (brain)	NM_000849
839	GSTM4	NM_000850	0.742529	0.119327	4.55173	4.12225	4.80366	4.55618	4.24077	3.92824	4.35928	4.04407	27.0115	22.4184	17.9236	14.2004	19.4237	15.6178	2948	chr1	110198698	110208123	1917	+	protein_coding	GSTM4-4|GTM4|MGC131945|MGC9247	.	glutathione S-transferase mu 4	NM_000850
840	GSTM5	NM_000851	1.02053	0.37381	6.15271e-06	0.0293193	0	1.84581e-05	0	5.59531e-06	1.92801e-05	0.0862054	0	0	0	0	0	0.0622555	2949	chr1	110254864	110260890	1570	+	protein_coding	GSTM5-5|GTM5	P29250	glutathione S-transferase mu 5	NM_000851
841	GSTP1	NM_000852	1.03754	0.37381	1.12288e-05	0.0531816	0	3.3686e-05	0	1.02115e-05	3.51862e-05	0.153961	0	0	0	0	0	0.113666	2950	chr11	67351066	67354124	958	+	protein_coding	DFN7|FAEES3|GST3|GSTP|PI	P34628	glutathione S-transferase pi 1	NM_000852
842	GSTT1	NM_000853	0.960886	0.76774	3.52232	3.46476	3.79371	3.53154	3.17607	3.48282	3.51528	3.39344	12.9083	10.5118	8.04691	10.1644	10.3803	9.58047	2952	chr22	24376133	24384311	1141	-	protein_coding	.	P26214	glutathione S-transferase theta 1	NM_000853
843	GUCY1A2	NM_000855	1.00494	0.4381	0.00311732	0.0102205	0.0026563	0.0032294	0.00346612	0.00409626	0.0264247	0	0.00186585	0.00220196	0.00241344	0.00282928	0.0182885	0	2977	chr11	106544738	106889171	16219	-	protein_coding	GC-SA2|GUC1A2	P30456	guanylate cyclase 1, soluble, alpha 2	NM_000855
844	GUCY1A3	NM_000856	1	1	0	0	0	0	0	0	0	0	0	0	0	0	0	0	2982	chr4	156587862	156658214	10676	+	protein_coding	GC-SA3|GUC1A3|GUCA3|GUCSA3|GUCY1A1	P1221	guanylate cyclase 1, soluble, alpha 3	NM_000856
845	GUCY1B3	NM_000857	0.999883	0.373887	0.000169547	4.71553e-08	0	1.04971e-07	0.000508478	3.18204e-08	1.09646e-07	0	0	0	0.000353861	0	0	0	2983	chr4	156680125	156728794	4171	+	protein_coding	GC-S-beta-1|GC-SB3|GUC1B3|GUCB3|GUCSB3|GUCY1B1	P8454	guanylate cyclase 1, soluble, beta 3	NM_000857
846	GUK1	NM_000858	0.971075	0.730951	4.86975	4.82741	4.76118	4.98405	4.85533	4.84417	4.97572	4.64306	26.2062	30.4996	27.9737	27.682	30.3115	24.1688	2987	chr1	228327785	228336655	1280	+	protein_coding	FLJ42686|FLJ43710|GMK	P27952	guanylate kinase 1	NM_000858
847	HMGCR	NM_000859	1.02261	0.750272	4.24748	4.27974	4.22852	4.09173	4.40503	4.33521	4.24851	4.25383	17.8058	15.9681	20.2049	19.1566	17.9143	18.2116	3156	chr5	74632993	74657926	4582	+	protein_coding	LDLCQ3	P25840	3-hydroxy-3-methylglutaryl-CoA reductase	NM_000859
848	HPGD	NM_000860	0.856841	0.136698	0.236962	0.0140603	0.369239	0.314704	0.000138323	8.72048e-05	0.0416916	0	0.292646	0.242456	0.000118893	2.52436e-05	0.0289207	2.58035e-05	3248	chr4	175411328	175444049	3297	-	protein_coding	15-PGDH|PGDH|PGDH1|SDR36C1	P33980	hydroxyprostaglandin dehydrogenase 15-(NAD)	NM_000860
849	HRH1	NM_000861	0.882764	0.373888	0.179953	5.30716e-05	0.483838	0.000118138	0	3.58127e-05	0.000123399	0	0.39959	0	0	0	0	0	3269	chr3	11178779	11304939	4818	+	protein_coding	H1-R|hisH1	P21341	histamine receptor H1	NM_000861
850	HSD3B1	NM_000862	1	1	0	0	0	0	0	0	0	0	0	0	0	0	0	0	3283	chr1	120049826	120057681	1680	+	protein_coding	3BETAHSD|HSD3B|HSDB3|HSDB3A|I|SDR11E1	P35093	hydroxy-delta-5-steroid dehydrogenase, 3 beta- and steroid delta-isomerase 1	NM_000862
851	HTR1B	NM_000863	1	1	0	0	0	0	0	0	0	0	0	0	0	0	0	0	3351	chr6	78171948	78173120	1173	-	protein_coding	5-HT1B|5-HT1DB|HTR1D2|HTR1DB|S12	P23107	5-hydroxytryptamine receptor 1B	NM_000863
852	HTR1D	NM_000864	0.999691	0.996752	0.743702	0.743256	0.797133	0.865589	0.549594	0.778275	0.65313	0.794264	0.740292	0.817922	0.464277	0.713907	0.568981	0.740031	3352	chr1	23518388	23521222	2835	-	protein_coding	5-HT1D|HT1DA|HTR1DA|HTRL|RDC4	P633	5-hydroxytryptamine receptor 1D	NM_000864
853	HTR1E	NM_000865	0.933936	0.324405	0.26336	0.164754	0.213437	0.203594	0.367148	0.06863	0.119327	0.296284	0.160203	0.150474	0.290107	0.0485395	0.0853926	0.23002	3354	chr6	87647024	87726397	2048	+	protein_coding	5-HT1E	P9658	5-hydroxytryptamine receptor 1E	NM_000865
854	HTR1F	NM_000866	1.01005	0.373851	2.97252e-06	0.0144302	0	8.91754e-06	0	0.0428556	9.31467e-06	0	0	0	0	0.0300689	0	0	3355	chr3	88031726	88042919	3178	+	protein_coding	5-HT1F|5HT6|HTR1EL|MR77	P30342	5-hydroxytryptamine receptor 1F	NM_000866
855	HTR2B	NM_000867	1.01739	0.877092	0.284501	0.30938	0.367585	0.186544	0.293656	0.288196	0.0560902	0.542771	0.291339	0.136893	0.226032	0.220667	0.0389883	0.460034	3357	chr2	231972950	231989824	2232	-	protein_coding	5-HT(2B)|5-HT2B	P8843	5-hydroxytryptamine receptor 2B	NM_000867
856	HTR2C	NM_000868	0.999999	0.933115	0.000521267	0.00051931	0.000483421	0.00054661	0.00053377	0.000527288	0.000531947	0.000498695	0.000339854	0.000371225	0.000371529	0.000363278	0.000360893	0.000356428	3358	chrX	113818551	114144624	4747	+	protein_coding	5-HT2C|5-HTR2C|HTR1C	P29062	5-hydroxytryptamine (serotonin) receptor 2C, G protein-coupled	NM_000868
857	HTR3A	NM_000869	1	1	0	0	0	0	0	0	0	0	0	0	0	0	0	0	3359	chr11	113845797	113861034	2314	+	protein_coding	5-HT-3|5-HT3A|5-HT3R|5HT3R|HTR3	P31419	5-hydroxytryptamine receptor 3A	NM_000869
858	HTR4	NM_000870	0.993792	0.373887	0.00898621	2.51388e-06	0.0267869	5.59606e-06	0	1.69637e-06	5.84527e-06	0	0.0188675	0	0	0	0	0	3360	chr5	147830595	148034090	4285	-	protein_coding	5-HT4|5-HT4R	P18870	5-hydroxytryptamine receptor 4	NM_000870
859	HTR6	NM_000871	1.13945	0.0131322	0.0580714	0.246415	0.0775204	0.062289	0.0340683	0.25935	0.16955	0.306985	0.0555872	0.0436168	0.0239676	0.196581	0.123763	0.239079	3362	chr1	19991780	20007459	3388	+	protein_coding	5-HT6|5-HT6R	P30946	5-hydroxytryptamine receptor 6	NM_000871
860	HTR7	NM_000872	1.00877	0.765076	0.0314384	0.0440349	0	0.0923317	0	0.0470056	0.0838758	0	0	0.065588	0	0.0330219	0.0593687	0	3363	chr10	92500576	92617671	4107	-	protein_coding	5-HT7	P26515	5-hydroxytryptamine receptor 7	NM_000872
861	ICAM2	NM_000873	0.999993	0.187044	1.04133e-05	2.84517e-09	8.74376e-06	2.24962e-05	0	1.91992e-09	6.61558e-09	0	6.18392e-06	1.51666e-05	0	0	0	0	3384	chr17	62079955	62097994	1447	-	protein_coding	CD102	P17718	intercellular adhesion molecule 2	NM_000873
862	IFNAR2	NM_000874	1.7753	0.104661	0.600265	1.42833	0.073785	0.0313811	1.30657	1.61841	1.07871	1.53184	0.0536912	0.0204549	1.47486	2.06784	1.10599	1.90328	3455	chr21	34602200	34636818	3255	+	protein_coding	IFN-R|IFN-alpha-REC|IFNABR|IFNARB	P13441	interferon alpha and beta receptor subunit 2	NM_000874
863	IGF1R	NM_000875	1.09792	0.0882015	5.09013	5.2249	5.10786	5.01835	5.14139	5.31421	5.19261	5.16342	33.5964	31.2514	34.3281	38.7296	35.3877	35.0944	3480	chr15	99191768	99507759	12335	+	protein_coding	CD221|IGFIR|IGFR|JTK13|MGC142170|MGC142172|MGC18216	P24900	insulin like growth factor 1 receptor	NM_000875
864	IGF2R	NM_000876	1.1438	0.00278798	4.18077	4.3746	4.17265	4.23162	4.13643	4.359	4.40038	4.36406	17.0921	17.6975	16.6034	19.4917	20.0159	19.7351	3482	chr6	160390131	160527583	9091	+	protein_coding	CD222|CIMPR|M6P-R|MPR1|MPRI	P17405	insulin like growth factor 2 receptor	NM_000876
865	IL1R1	NM_000877	0.864392	0.0726031	3.16857	2.95833	3.00932	3.25295	3.23107	3.00316	2.97602	2.89356	7.07595	8.49277	8.39744	7.0067	6.8314	6.48135	3554	chr2	102686836	102796334	5386	+	protein_coding	CD121A|D2S1473|IL-1R-alpha|IL1R|IL1RA|P80	P24615	interleukin 1 receptor type 1	NM_000877
866	IL2RB	NM_000878	1.1695	0.0271156	0.528538	0.754425	0.418259	0.541177	0.619109	0.745334	0.695584	0.819649	0.337973	0.452295	0.536534	0.675293	0.616027	0.770584	3560	chr22	37521880	37545962	4043	-	protein_coding	CD122|P70-75	P30092	interleukin 2 receptor subunit beta	NM_000878
867	IL5	NM_000879	1	1	0	0	0	0	0	0	0	0	0	0	0	0	0	0	3567	chr5	131877136	131879214	816	-	protein_coding	EDF|IL-5|TRF	P26985	interleukin 5	NM_000879
868	IL7	NM_000880	1	1	0	0	0	0	0	0	0	0	0	0	0	0	0	0	3574	chr8	79645007	79717758	2076	-	protein_coding	IL-7	P20536	interleukin 7	NM_000880
869	IL12A	NM_000882	1.06818	0.37381	2.03455e-05	0.0951768	0	6.10356e-05	0	1.85023e-05	6.37537e-05	0.268473	0	0	0	0	0	0.206112	3592	chr3	159706623	159713806	1443	+	protein_coding	CLMF|IL-12A|NFSK|NKSF1|P35	P13980	interleukin 12A	NM_000882
870	IMPDH1	NM_000883	1.48175	0.292499	1.95911	2.52641	2.39984	1.17574	2.04549	1.70394	2.88871	2.72685	4.29131	1.2483	3.1315	2.25353	6.37858	5.65623	3614	chr7	128032331	128050036	2671	-	protein_coding	DKFZp781N0678|IMPD|IMPD1|LCA11|RP10|sWSS2608	P31964	IMP (inosine 5'-monophosphate) dehydrogenase 1	NM_000883
871	IMPDH2	NM_000884	0.86286	0.0642726	7.15296	6.94016	7.27043	7.16753	7.00896	6.90336	6.98456	6.93136	153.895	142.061	127.921	118.528	124.988	121.948	3615	chr3	49061762	49066875	1691	-	protein_coding	IMPD2|IMPDH-II	P34955	IMP (inosine 5'-monophosphate) dehydrogenase 2	NM_000884
872	ITGA4	NM_000885	1.00855	0.632083	0.00956204	0.0218497	0.028479	1.94876e-05	0	0.0645612	2.03554e-05	0	0.0200759	0	0	0.0456536	0	0	3676	chr2	182321619	182402468	6076	+	protein_coding	CD49D|IA4|MGC90518	P24853	integrin subunit alpha 4	NM_000885
873	ITGAX	NM_000887	1.00581	0.661398	0.0266967	0.0350553	0.055309	5.15635e-05	0.0241973	0.0284753	0.0501747	0.0263956	0.0393167	8.7882e-06	0.0169524	0.0198666	0.0350497	0.0187776	3687	chr16	31366455	31394318	4132	+	protein_coding	CD11C|SLEB6	P17298	integrin subunit alpha X	NM_000887
874	ITGB6	NM_000888	1.42029	0.151452	2.26342	2.7696	1.47509	2.46163	2.61246	2.55977	2.92669	2.79864	1.78949	4.48515	5.12033	4.88872	6.57305	5.99879	3694	chr2	160956177	161056824	4612	-	protein_coding	.	P15889	integrin subunit beta 6	NM_000888
875	ITGB7	NM_000889	0.873285	0.162581	0.570419	0.374944	0.390376	0.703673	0.599777	0.344003	0.276719	0.495345	0.312129	0.625633	0.51601	0.268691	0.209661	0.413218	3695	chr12	53585102	53601091	2867	-	protein_coding	.	.	integrin subunit beta 7	NM_000889
876	KCNJ5	NM_000890	0.993758	0.660497	0.0238665	0.0148336	0.0310396	2.42009e-05	0.0402286	7.3362e-06	2.52787e-05	0.0440194	0.0218991	0	0.0283293	0	0	0.0314099	3762	chr11	128761313	128787951	2899	+	protein_coding	CIR|GIRK4|KATP1|KIR3.4	P6606	potassium voltage-gated channel subfamily J member 5	NM_000890
877	KCNJ2	NM_000891	0.997509	0.742352	0.011899	0.00830046	0.0161916	0.0194305	0	0.0247467	1.30183e-05	0	0.0113761	0.013407	0	0.0172458	0	0	3759	chr17	68165676	68176183	5386	+	protein_coding	HHBIRK1|HHIRK1|IRK1|KIR2.1|LQT7|SQT3	P14864	potassium voltage-gated channel subfamily J member 2	NM_000891
878	KLKB1	NM_000892	1	1	0	0	0	0	0	0	0	0	0	0	0	0	0	0	3818	chr4	187148672	187179625	2247	+	protein_coding	KLK3|PPK	P7147	kallikrein B1	NM_000892
879	KNG1	NM_000893	1	0.373806	1.51312e-10	7.01464e-07	0	4.53935e-10	0	1.37604e-10	4.74151e-10	2.10378e-06	0	0	0	0	0	1.53023e-06	3827	chr3	186435098	186462199	2143	+	protein_coding	BDK|KNG	P26736	kininogen 1	NM_000893
880	LHB	NM_000894	0.826362	0.534583	0.612197	0.337043	0.458077	0.000691932	1.14507	0.000209774	0.31656	0.626664	0.375251	0	1.21242	0	0.243435	0.548154	3972	chr19	49519237	49520347	523	-	protein_coding	CGB4|LSH-B|hLHB	P14415	luteinizing hormone beta polypeptide	NM_000894
881	LTA4H	NM_000895	1.00336	0.911474	5.04197	5.04681	5.0453	5.05556	5.02487	5.07624	5.09518	4.96566	32.1275	32.0973	31.587	32.6877	33.0122	30.4726	4048	chr12	96394531	96437298	2446	-	protein_coding	.	P24374	leukotriene A4 hydrolase	NM_000895
882	CYP4F3	NM_000896	0.996993	0.117276	0.00434563	1.21262e-06	0.00614774	2.69938e-06	0.00687658	8.18279e-07	2.81959e-06	0	0.00431	0	0.00479039	0	0	0	4051	chr19	15751707	15771570	3117	+	protein_coding	CPF3|CYP4F|LTB4H	P35170	cytochrome P450 family 4 subfamily F member 3	NM_000896
883	MAOB	NM_000898	0.910286	0.238311	2.8808	2.74519	3.02026	2.72295	2.8839	2.82177	2.72925	2.68099	7.13566	5.5734	6.38753	6.06111	5.60093	5.45505	4129	chrX	43625857	43741721	2595	-	protein_coding	MGC26382	P33393	monoamine oxidase B	NM_000898
884	KITLG	NM_000899	1.19043	0.202831	2.97159	3.22307	2.94146	2.80871	3.14461	3.38331	3.30021	2.95007	6.70544	5.97391	7.85099	9.42143	8.80695	6.78013	4254	chr12	88886570	88974250	5443	-	protein_coding	DKFZp686F2250|FPH2|KL-1|Kitl|MGF|SCF|SF|SHEP7	P13223	KIT ligand	NM_000899
885	MGP	NM_000900	1.06767	0.138017	5.14114	5.23561	5.15532	5.11949	5.14835	5.26723	5.29734	5.13729	34.7533	33.5948	34.4991	37.4562	38.1289	34.4483	4256	chr12	15034115	15038853	1473	-	protein_coding	MGLAP|NTI	P36124	matrix Gla protein	NM_000900
886	NR3C2	NM_000901	0.997226	0.960285	0.123248	0.119241	0.058111	0.213651	0.0933333	9.32998e-05	0.152689	0.197595	0.0414058	0.158619	0.0669485	3.17811e-05	0.110796	0.148201	4306	chr4	148999915	149363672	5898	-	protein_coding	FLJ41052|MCR|MGC133092|MLR|MR|NR3C2VIT	P30019	nuclear receptor subfamily 3 group C member 2	NM_000901
887	MME	NM_000902	0.999597	0.323528	0.00895127	0.00837031	0.0088423	0.00911313	0.00889836	0.00859478	0.00911933	0.00739627	0.00620451	0.00625083	0.00620341	0.00595026	0.00625129	0.00524978	4311	chr3	154797436	154901518	6038	+	protein_coding	CALLA|CD10|DKFZp686O16152|MGC126681|MGC126707|NEP	P11069	membrane metallo-endopeptidase	NM_000902
888	NQO1	NM_000903	0.745061	0.000338841	7.86505	7.44048	7.9022	7.84591	7.84629	7.44283	7.49905	7.37696	239.008	227.944	229.347	172.726	178.969	166.447	1728	chr16	69743304	69760533	2591	-	protein_coding	DHQU|DIA4|DTD|NMOR1|NMORI|QR1	P19023	NAD(P)H quinone dehydrogenase 1	NM_000903
889	NQO2	NM_000904	1.12008	0.275826	3.92775	4.09135	4.01198	3.97018	3.79173	3.87844	4.25359	4.11735	15.184	14.5993	12.8622	13.6859	17.9856	16.4741	4835	chr6	3000050	3020110	1787	+	protein_coding	DHQV|DIA6|NMOR2|QR2	P12955	NAD(P)H quinone dehydrogenase 2	NM_000904
890	NPY	NM_000905	1	1	0	0	0	0	0	0	0	0	0	0	0	0	0	0	4852	chr7	24323807	24331484	560	+	protein_coding	PYY4	P8127	neuropeptide Y	NM_000905
891	NPR1	NM_000906	0.972375	0.672787	0.539561	0.499145	0.656022	0.50715	0.447441	0.395081	0.48398	0.610242	0.577729	0.418732	0.364072	0.314362	0.396052	0.530721	4881	chr1	153651164	153666468	4185	+	protein_coding	ANPRA|ANPa|GUC2A|GUCY2A|NPRA	P17246	natriuretic peptide receptor 1	NM_000906
892	NPR3	NM_000908	1.00228	0.945255	0.0851321	0.0884221	0.141476	0.00011305	0.11002	0.0601526	0.113591	0.0910246	0.103525	1.93417e-06	0.0793646	0.0424471	0.0812555	0.0659468	4883	chr5	32710743	32791830	7682	+	protein_coding	ANPRC|GUCY2B|NPRC	P25264	natriuretic peptide receptor 3	NM_000908
893	NPY1R	NM_000909	1.00367	0.9211	6.03627	6.04155	6.00827	5.99953	6.09888	6.03258	6.11061	5.9784	63.5794	62.6673	67.6051	64.365	67.751	62.5078	4886	chr4	164245117	164253947	2958	-	protein_coding	NPYR	P25913	neuropeptide Y receptor Y1	NM_000909
894	NPY2R	NM_000910	1	1	0	0	0	0	0	0	0	0	0	0	0	0	0	0	4887	chr4	156129781	156138230	3628	+	protein_coding	.	P5927	neuropeptide Y receptor Y2	NM_000910
895	OPRD1	NM_000911	1.0747	0.243999	0.0849805	0.188911	0	0.180676	0.0684723	0.0802555	0.265115	0.215083	0	0.132496	0.0487058	0.0570348	0.200507	0.162298	4985	chr1	29138654	29190208	1774	+	protein_coding	OPRD	P3886	opioid receptor delta 1	NM_000911
896	OPRK1	NM_000912	1.00596	0.723841	0.0251984	0.0337689	0.0522801	3.66615e-05	0.0228026	0.0532841	0.0474329	0	0.0371275	0	0.015968	0.0375216	0.0330983	0	4986	chr8	54138276	54164194	5133	-	protein_coding	KOR|OPRK	P32424	opioid receptor kappa 1	NM_000912
897	OPRL1	NM_000913	1.41911	0.0659425	0.435887	0.940874	0	0.379732	0.813219	1.00554	0.939174	0.874954	0	0.298654	0.757888	1.00631	0.912911	0.84007	4987	chr20	62711471	62731996	3604	+	protein_coding	KOR-3|MGC34578|NOCIR|OOR|ORL1	P6290	opioid related nociceptin receptor 1	NM_000913
898	OPRM1	NM_000914	1	1	0	0	0	0	0	0	0	0	0	0	0	0	0	0	4988	chr6	154331631	154568001	20342	+	protein_coding	KIAA0403|LMOR|MOR|MOR1|OPRM	P16699	opioid receptor mu 1	NM_000914
899	OXT	NM_000915	1	1	0	0	0	0	0	0	0	0	0	0	0	0	0	0	5020	chr20	3052266	3053163	513	+	protein_coding	MGC126890|MGC126892|OT|OT-NPI	P1945	oxytocin/neurophysin I prepropeptide	NM_000915
900	OXTR	NM_000916	0.988775	0.874797	1.23705	1.22077	1.07207	1.3853	1.23682	1.2888	1.18786	1.18315	1.10673	1.60448	1.35817	1.44103	1.27097	1.28092	5021	chr3	8792095	8811300	4360	-	protein_coding	OT-R	P30436	oxytocin receptor	NM_000916
901	P4HA1	NM_000917	1.97868	0.030957	2.67877	3.66331	2.99648	2.78527	2.11608	3.25931	3.76626	3.89016	7.00569	5.86	3.33989	8.56231	12.5492	13.9147	5033	chr10	74766980	74856732	3110	-	protein_coding	P4HA	P33504	prolyl 4-hydroxylase subunit alpha 1	NM_000917
902	P4HB	NM_000918	0.993026	0.882998	8.15155	8.14146	8.2536	8.1616	8.03081	8.14189	8.14129	8.14118	305.207	283.936	260.777	281.037	279.892	283.386	5034	chr17	79801034	79818544	2578	-	protein_coding	DSI|ERBA2L|GIT|P4Hbeta|PDI|PDIA1|PHDB|PO4DB|PO4HB|PROHB	P30298	prolyl 4-hydroxylase subunit beta	NM_000918
903	PAM	NM_000919	0.757263	0.0116098	1.0696	0.668466	1.1958	0.942519	1.05933	0.730452	0.591939	0.679619	1.2946	0.917075	1.08498	0.657934	0.503571	0.607465	5066	chr5	102201527	102366808	5592	+	protein_coding	PAL|PHM	P29134	peptidylglycine alpha-amidating monooxygenase	NM_000919
904	PC	NM_000920	0.877428	0.192665	3.87094	3.68229	3.80599	4.05123	3.73632	3.72823	3.54894	3.76081	13.0299	15.5056	12.3394	12.2342	10.6455	12.6488	5091	chr11	66615997	66725847	4241	-	protein_coding	PCB	P11190	pyruvate carboxylase	NM_000920
905	PDE3A	NM_000921	1	0.479983	3.91073e-06	8.3636e-06	0	7.4824e-09	1.17247e-05	1.25077e-05	1.25831e-05	0	0	0	8.17346e-06	8.59311e-06	8.45686e-06	0	5139	chr12	20522179	20837041	7610	+	protein_coding	CGI-PDE	P32929	phosphodiesterase 3A	NM_000921
906	PDE3B	NM_000922	0.880678	0.0846137	2.15803	1.97472	2.13864	2.05933	2.26836	2.03093	2.01595	1.872	3.41476	3.15184	3.82125	3.08186	3.02803	2.68215	5140	chr11	14665269	14893604	6090	+	protein_coding	HcGIP1|cGIPDE1	P26924	phosphodiesterase 3B	NM_000922
907	PDE4C	NM_000923	0.883671	0.130518	0.178471	5.25776e-05	0.213528	0.000117039	0.305036	3.54793e-05	0.000122251	0	0.160169	0	0.235687	0	0	0	5143	chr19	18318771	18359010	5811	-	protein_coding	DPDE1|MGC126222	P7410	phosphodiesterase 4C	NM_000923
908	PDE1B	NM_000924	1	1	0	0	0	0	0	0	0	0	0	0	0	0	0	0	5153	chr12	54943177	54973023	3966	+	protein_coding	PDE1B1|PDES1B	P13130	phosphodiesterase 1B	NM_000924
909	PDHB	NM_000925	0.807035	0.0124705	4.99449	4.6852	4.95707	5.01388	5.01181	4.66415	4.82044	4.55894	30.1604	31.1583	31.2925	24.3165	27.1137	22.7452	5162	chr3	58413357	58419579	1473	-	protein_coding	DKFZp564K0164|PHE1B	.	pyruvate dehydrogenase (lipoamide) beta	NM_000925
910	PGR	NM_000926	1.31681	0.329639	1.0073	1.40435	0.768087	1.14514	1.08118	1.13267	1.90566	1.00109	0.706416	1.20504	1.117	1.19064	2.73585	1.01049	5241	chr11	100900355	101000458	12535	-	protein_coding	NR3C3|PR	.	progesterone receptor	NM_000926
911	ABCB1	NM_000927	0.983226	0.494049	0.066967	0.0425615	0.0185503	0.0868989	0.0942506	2.08341e-05	0.0743626	0.0522939	0.0130677	0.0615836	0.0676139	0	0.0524237	0.0374469	5243	chr7	87133179	87342639	4716	-	protein_coding	ABC20|CD243|CLCS|GP170|MDR1|MGC163296|P-GP|PGY1	P35710	ATP-binding cassette, sub-family B (MDR/TAP), member 1	NM_000927
912	PLA2G1B	NM_000928	0.940134	0.374019	0.0890873	2.52898e-05	0	0.252284	0	1.70656e-05	5.88033e-05	0	0	0.190078	0	0	0	0	5319	chr12	120759914	120765592	565	-	protein_coding	MGC119834|MGC119835|PLA2|PLA2A|PPLA2	P25976	phospholipase A2 group IB	NM_000928
913	PLA2G5	NM_000929	1	1	0	0	0	0	0	0	0	0	0	0	0	0	0	0	5322	chr1	20396701	20418394	1894	+	protein_coding	DKFZp686C2294|GV-PLA2|MGC46205|PLA2-10|hVPLA(2)	P24710	phospholipase A2 group V	NM_000929
914	PLAT	NM_000930	1.17835	0.0088174	0.36531	0.602074	0.330071	0.46094	0.299786	0.568206	0.617057	0.620369	0.258354	0.374131	0.231312	0.48188	0.530839	0.541424	5327	chr8	42032236	42065194	3173	-	protein_coding	DKFZp686I03148|T-PA|TPA	P22710	plasminogen activator, tissue type	NM_000930
915	PLCB3	NM_000932	1.19911	0.00843749	3.8321	4.09407	3.84686	3.77855	3.86933	4.16578	4.0995	4.01285	13.4346	12.6575	13.628	16.9239	16.0611	15.254	5331	chr11	64018995	64036924	5815	+	protein_coding	FLJ37084	P8465	phospholipase C beta 3	NM_000932
916	PLCB4	NM_000933	0.967717	0.608801	1.76983	1.72249	1.83332	1.64292	1.82533	1.65639	1.66633	1.83746	2.57206	2.1116	2.54634	2.1488	2.16204	2.59264	5332	chr20	9049701	9461462	5658	+	protein_coding	FLJ16169|PI-PLC	P5319	phospholipase C beta 4	NM_000933
917	SERPINF2	NM_000934	0.908603	0.382715	0.141406	0.00312758	0.388211	0.000244253	0	2.83738e-05	0.00495942	0.00438992	0.309719	0.00010208	1.10774e-05	0	0.00332612	0.00321061	5345	chr17	1646130	1658559	2335	+	protein_coding	A2AP|AAP|ALPHA-2-PI|API|PLI	P1191	serpin family F member 2	NM_000934
918	PLOD2	NM_000935	1.15806	0.0405713	4.95389	5.1656	4.94696	4.87436	5.03581	5.24503	5.18091	5.06512	29.9459	28.1874	31.835	36.8697	35.0959	32.7167	5352	chr3	145787228	145879282	4059	-	protein_coding	LH2|TLH	P14307	procollagen-lysine,2-oxoglutarate 5-dioxygenase 2	NM_000935
919	PNLIP	NM_000936	1	1	0	0	0	0	0	0	0	0	0	0	0	0	0	0	5406	chr10	118305428	118327367	1498	+	protein_coding	PL	P34186	pancreatic lipase	NM_000936
920	POLR2A	NM_000937	0.968576	0.332291	5.81671	5.77065	5.86528	5.73796	5.84369	5.7857	5.74248	5.78335	57.4836	52.1101	56.4825	54.0844	52.2653	54.4743	5430	chr17	7387698	7417935	6738	+	protein_coding	MGC75453|POLR2|POLRA|RPB1|RPBh1|RPO2|RPOL2|RpIILS|hRPB220|hsRPB1	P24998	polymerase (RNA) II subunit A	NM_000937
921	POLR2B	NM_000938	1.04654	0.308983	5.16333	5.22895	5.15222	5.1755	5.16218	5.2774	5.11534	5.28773	34.6768	34.9652	34.8409	37.7281	33.4877	38.3401	5431	chr4	57844806	57897328	4223	+	protein_coding	POL2RB|RPB2|hRPB140|hsRPB2	P16924	polymerase (RNA) II subunit B	NM_000938
922	POMC	NM_000939	1	1	0	0	0	0	0	0	0	0	0	0	0	0	0	0	5443	chr2	25383722	25391559	1295	-	protein_coding	ACTH|CLIP|LPH|MSH|NPP|POC	P18316	proopiomelanocortin	NM_000939
923	PON3	NM_000940	0.941235	0.312938	0.315403	0.228029	0.442534	0.1908	0.301811	0.241404	0.214695	0.227865	0.360252	0.140274	0.232978	0.181752	0.159204	0.172955	5446	chr7	94989184	95025687	1191	-	protein_coding	.	P34305	paraoxonase 3	NM_000940
924	POR	NM_000941	1.03347	0.522328	6.25036	6.29786	6.35398	6.24741	6.1419	6.32155	6.23551	6.33452	81.0644	74.6021	69.6825	78.8613	73.9643	80.2847	5447	chr7	75544420	75616173	2499	+	protein_coding	CPR|CYPOR|DKFZp686G04235|FLJ26468|P450R	P6578	cytochrome p450 oxidoreductase	NM_000941
925	PPIB	NM_000942	0.888651	0.159257	8.58083	8.41052	8.71801	8.59019	8.41876	8.32902	8.43907	8.46006	421.487	382.502	341.543	320.096	344.283	353.735	5479	chr15	64448014	64455354	1028	-	protein_coding	CYP-S1|CYPB|MGC14109|MGC2224|OI9|SCYLP	P16112	peptidylprolyl isomerase B	NM_000942
926	PPIC	NM_000943	1.03322	0.353031	6.06041	6.10756	6.1211	6.02059	6.0375	6.05596	6.16586	6.09871	68.8318	63.6028	64.7481	65.433	70.435	68.0285	5480	chr5	122359078	122372425	1236	-	protein_coding	CYPC|MGC3673	P10313	peptidylprolyl isomerase C	NM_000943
927	PPP3CA	NM_000944	1.24873	0.409181	0.192772	0.513235	0	0.514878	0	0.953755	0.427427	0	0	0.42664	0	0.935853	0.342763	0	5530	chr4	101944587	102268628	4676	-	protein_coding	CALN|CALNA|CALNA1|CCN1|CNA1|PPP2B	P20670	protein phosphatase 3 catalytic subunit alpha	NM_000944
928	PPP3R1	NM_000945	1.04545	0.451022	5.05389	5.11801	4.96699	4.98297	5.1998	5.14425	5.11883	5.09046	30.3787	30.4709	35.7871	34.3139	33.5738	33.3141	5534	chr2	68405989	68479651	3011	-	protein_coding	CALNB1|CNB|CNB1	P8137	protein phosphatase 3 regulatory subunit B, alpha	NM_000945
929	PRIM1	NM_000946	0.914254	0.173584	4.94814	4.81881	4.84106	5.04883	4.94705	4.81659	4.90235	4.73248	27.7546	31.9467	29.8754	27.1387	28.7568	25.7768	5557	chr12	57125364	57146146	1462	-	protein_coding	MGC12308|p49	P3900	primase (DNA) subunit 1	NM_000946
930	PRIM2	NM_000947	0.896736	0.0162863	4.05924	3.902	3.99664	4.12261	4.05572	3.88729	3.91889	3.89963	15.0126	16.3402	15.6449	13.7764	14.0511	14.0295	5558	chr6	57179603	57513376	2405	+	protein_coding	MGC75142|PRIM2A|p58	P9779	primase (DNA) subunit 2	NM_000947
931	PRL	NM_000948	1	1	0	0	0	0	0	0	0	0	0	0	0	0	0	0	5617	chr6	22287473	22303082	1033	-	protein_coding	.	P21122	prolactin	NM_000948
932	PRLR	NM_000949	1.27997	0.0174773	3.87502	4.23113	3.65656	3.9449	4.00053	4.22801	4.2173	4.24792	11.653	14.3273	15.0206	17.7137	17.5126	18.128	5618	chr5	35048861	35230691	12780	-	protein_coding	hPRLrI	.	prolactin receptor	NM_000949
933	PRRG1	NM_000950	1.18827	0.576931	0.158842	0.407706	0	0.432074	0	0.985094	0.000406313	0	0	0.3473	3.65703e-05	0.978416	0	0.000126382	5638	chrX	37208528	37316548	6158	+	protein_coding	PRGP1	P15401	proline rich and Gla domain 1	NM_000950
934	PRRG2	NM_000951	1.07225	0.327058	2.7102	2.81084	2.78761	2.67539	2.66436	2.65188	2.9221	2.84528	5.92458	5.3604	5.34485	5.27655	6.54677	6.23136	5639	chr19	50084587	50094265	1393	+	protein_coding	PRGP2	P25086	proline rich and Gla domain 2	NM_000951
935	PTAFR	NM_000952	0.963706	0.373887	0.05335	1.51061e-05	0.154443	3.36269e-05	0	1.01936e-05	3.51245e-05	0	0.113466	0	0	0	0	0	5724	chr1	28473677	28520447	4262	-	protein_coding	PAFR	P35110	platelet activating factor receptor	NM_000952
936	PTGDR	NM_000953	1	1	0	0	0	0	0	0	0	0	0	0	0	0	0	0	5729	chr14	52734431	52743442	3033	+	protein_coding	AS1|ASRT1|DP|DP1|MGC49004	P33110	prostaglandin D2 receptor (DP)	NM_000953
937	PTGDS	NM_000954	0.971477	0.654043	0.111359	0.0696117	0	0.15617	0.171734	0.199398	0.000119851	0	0	0.113542	0.126574	0.147941	0	0	5730	chr9	139871956	139876194	812	+	protein_coding	L-PGDS|LPGDS|PDS|PGD2|PGDS|PGDS2	P28490	prostaglandin D2 synthase	NM_000954
938	PTGER1	NM_000955	1.00753	0.919779	0.176853	0.187673	0.19562	0.080714	0.249128	0.102794	0.0912555	0.353466	0.145905	0.0569295	0.18872	0.0736387	0.0646131	0.279837	5731	chr19	14583278	14586174	1421	-	protein_coding	EP1	P18392	prostaglandin E receptor 1	NM_000955
939	PTGER2	NM_000956	1.07197	0.561739	0.75515	0.855419	0.849625	0.894488	0.487937	1.04528	0.733062	0.767165	0.804909	0.854525	0.403025	1.06226	0.658131	0.707851	5732	chr14	52781016	52795322	2478	+	protein_coding	EP2	P34226	prostaglandin E receptor 2	NM_000956
940	PTGER4	NM_000958	0.832766	0.0533178	1.34563	1.08161	1.4635	1.23105	1.33289	1.15503	1.14356	0.935872	1.76325	1.34035	1.52053	1.22486	1.20232	0.921613	5734	chr5	40680032	40693837	3416	+	protein_coding	EP4|EP4R|MGC126583	P14981	prostaglandin E receptor 4	NM_000958
941	PTGFR	NM_000959	1	1	0	0	0	0	0	0	0	0	0	0	0	0	0	0	5737	chr1	78956728	79006386	5431	+	protein_coding	FP|MGC120498|MGC46203	P11388	prostaglandin F receptor	NM_000959
942	PTGIR	NM_000960	1	1	0	0	0	0	0	0	0	0	0	0	0	0	0	0	5739	chr19	47123725	47128354	2086	-	protein_coding	IP|MGC102830|PRIPR	P13075	prostaglandin I2 (prostacyclin) receptor (IP)	NM_000960
943	PTGIS	NM_000961	0.994048	0.32999	0.03093	0.022318	0.015528	0.0370273	0.0401106	0.0237667	0.0211825	0.0220036	0.0109183	0.0257371	0.0282464	0.0165521	0.0146059	0.0156399	5740	chr20	48120411	48184707	5603	-	protein_coding	CYP8|CYP8A1|MGC126858|MGC126860|PGIS|PTGI	P33354	prostaglandin I2 (prostacyclin) synthase	NM_000961
944	PTGS1	NM_000962	1	0.468211	1.22955e-06	6.61683e-06	3.68391e-06	4.73782e-09	0	1.4362e-09	1.9849e-05	0	2.61005e-06	0	0	0	1.33613e-05	0	5742	chr9	125132809	125157982	5674	+	protein_coding	COX1|COX3|PCOX1|PGG/HS|PGHS-1|PGHS1|PHS1|PTGHS	P1232	prostaglandin-endoperoxide synthase 1	NM_000962
945	PTGS2	NM_000963	1	1	0	0	0	0	0	0	0	0	0	0	0	0	0	0	5743	chr1	186640944	186649559	4493	-	protein_coding	COX-2|COX2|GRIPGHS|PGG/HS|PGHS-2|PHS-2|hCox-2	P4717	prostaglandin-endoperoxide synthase 2	NM_000963
946	RARA	NM_000964	1.38132	0.201862	2.21639	2.68244	2.78021	1.75297	1.88825	2.81521	2.65204	2.56912	5.88747	2.35466	2.70518	6.03	5.25949	4.97018	5914	chr17	38465423	38513895	4361	+	protein_coding	NR1B1|RAR	P16580	retinoic acid receptor alpha	NM_000964
947	RARG	NM_000966	0.937859	0.41142	5.46865	5.3761	5.54575	5.41859	5.43835	5.55318	5.25264	5.30424	45.863	41.5655	42.4024	45.8864	36.9289	38.8002	5916	chr12	53604350	53626040	3431	-	protein_coding	NR1B3|RARC	P19330	retinoic acid receptor gamma	NM_000966
948	RPL3	NM_000967	0.918531	0.265955	9.83343	9.71083	9.98493	9.82515	9.6734	9.71987	9.73078	9.68139	1015.72	901.655	816.337	841.023	844.311	826.114	6122	chr22	39708887	39715670	1327	-	protein_coding	MGC104284|TARBP-B	P2894	ribosomal protein L3	NM_000967
949	RPL4	NM_000968	0.921989	0.172799	10.3982	10.2811	10.4878	10.4157	10.2839	10.2403	10.3519	10.2483	1439.69	1358.24	1246.91	1206.77	1299.16	1224.24	6124	chr15	66791653	66797193	1441	-	protein_coding	.	P6398	ribosomal protein L4	NM_000968
950	RPL5	NM_000969	0.890503	0.028769	9.12396	8.95665	9.19467	9.08064	9.09385	8.88749	8.99306	8.98698	586.905	537.769	545.937	471.879	505.924	510.125	6125	chr1	93297594	93307481	1031	+	protein_coding	DBA6|MGC117339	P16914	ribosomal protein L5	NM_000969
951	RPL6	NM_000970	0.903208	0.096144	10.6056	10.4587	10.654	10.5958	10.5655	10.341	10.5674	10.4589	1615.68	1538.96	1515.88	1294.06	1508.64	1416.79	6128	chr12	112842994	112847443	1183	-	protein_coding	SHUJUN-2|TAXREB107|TXREB1	P22694	ribosomal protein L6	NM_000970
952	RPL7	NM_000971	0.881028	0.0717521	10.933	10.7503	11.0421	10.8856	10.8647	10.6684	10.7461	10.8317	2114.71	1881.57	1865.4	1623.99	1707.67	1834.86	6129	chr8	74202874	74205869	837	-	protein_coding	MGC117326|humL7-1	P24085	ribosomal protein L7	NM_000971
953	RPL7A	NM_000972	0.903254	0.140825	11.4873	11.3405	11.5993	11.4755	11.3785	11.2589	11.4166	11.3416	3112.08	2832.5	2663.97	2445.96	2718.6	2613.24	6130	chr9	136215069	136218280	890	+	protein_coding	SURF3|TRUP	P6301	ribosomal protein L7a	NM_000972
954	RPL8	NM_000973	0.900773	0.222398	11.5411	11.3903	11.6733	11.5597	11.3746	11.3044	11.4908	11.3694	3275.76	3002.77	2656.73	2524.33	2862.08	2664.1	6132	chr8	146015154	146017805	975	-	protein_coding	.	P21770	ribosomal protein L8	NM_000973
955	RPL11	NM_000975	0.87094	0.177039	10.3931	10.1937	10.5048	10.4346	10.2254	10.0009	10.2691	10.2933	1456.76	1376.2	1197.3	1022.08	1226.61	1263.1	6135	chr1	24018269	24022915	782	+	protein_coding	DBA7|GIG34	P20451	ribosomal protein L11	NM_000975
956	RPL12	NM_000976	0.902831	0.212253	11.0636	10.9161	11.1646	11.0493	10.9703	10.7518	11.0424	10.9393	2302.14	2107.73	2007.22	1720.69	2097.26	1977.1	6136	chr9	130209953	130213711	660	-	protein_coding	.	P22581	ribosomal protein L12	NM_000976
957	RPL13	NM_000977	0.839204	0.0560426	8.65175	8.39885	8.7881	8.65011	8.50299	8.33076	8.44652	8.41678	442.521	398.765	362.138	320.482	346.069	343.256	6137	chr16	89627065	89633237	4828	+	protein_coding	BBC1|D16S444E|FLJ27453|FLJ27454|MGC117342|MGC71373	P13411	ribosomal protein L13	NM_000977
958	RPL23	NM_000978	0.830089	0.0191707	9.64634	9.37768	9.70478	9.63106	9.60121	9.24846	9.48553	9.38925	836.27	788.034	776.445	606.315	712.163	674.498	9349	chr17	37006321	37010053	577	-	protein_coding	MGC111167|MGC117346|MGC72008|rpL17	P33827	ribosomal protein L23	NM_000978
959	RPL18	NM_000979	0.888467	0.141682	10.1381	9.96747	10.2527	10.1161	10.0371	9.82381	10.0441	10.0244	1223.1	1103.34	1050.71	903.924	1049.36	1048.09	6141	chr19	49118584	49122675	879	-	protein_coding	.	P22274	ribosomal protein L18	NM_000979
960	RPL18A	NM_000980	0.877956	0.0743637	10.5699	10.3822	10.6787	10.5431	10.4808	10.2808	10.4432	10.4173	1643.6	1483.72	1429.42	1241.18	1384.07	1376.49	6142	chr19	17970687	17974133	671	+	protein_coding	.	P29403	ribosomal protein L18a	NM_000980
961	RPL19	NM_000981	0.844826	0.0617863	9.80864	9.56537	9.92429	9.81806	9.67257	9.45347	9.64978	9.58596	973.867	897.234	815.865	699.05	798.161	773.174	6143	chr17	37356536	37360980	732	+	protein_coding	DKFZp779D216|FLJ27452|MGC71997	P20188	ribosomal protein L19	NM_000981
962	RPL21	NM_000982	0.937477	0.912941	6.14536	6.05222	7.04641	5.86631	4.44845	6.71838	5.34677	5.73011	131.594	57.0473	20.8574	104.152	39.4751	52.476	6144	chr13	27825692	27830471	436	+	protein_coding	DKFZp686C06101|FLJ27458|L21|MGC104274|MGC104275|MGC71252	P32393	ribosomal protein L21	NM_000982
963	RPL22	NM_000983	0.905821	0.111872	7.90321	7.76051	7.94922	7.89693	7.86214	7.61787	7.83844	7.8152	246.962	236.181	231.893	195.136	226.705	225.87	6146	chr1	6245080	6259679	2085	-	protein_coding	EAP|HBP15|HBP15/L22	P27156	ribosomal protein L22	NM_000983
964	RPL23A	NM_000984	0.87198	0.0627943	9.48671	9.28908	9.57779	9.44701	9.43078	9.17234	9.38994	9.29673	765.726	693.53	689.821	575.101	666.443	632.539	6147	chr17	27047000	27051374	970	+	protein_coding	FLJ27455|MDA20	P28359	ribosomal protein L23a	NM_000984
965	RPL17	NM_000985	1.01571	0.670759	7.57536	7.59785	7.62197	7.59422	7.50744	7.55846	7.66657	7.56599	196.64	191.288	181.13	187.224	201.135	189.878	6139	chr18	47014851	47018935	1209	-	protein_coding	FLJ92089|MGC117162|rpL23	P25740	ribosomal protein L17	NM_000985
966	RPL24	NM_000986	0.912482	0.300193	10.6896	10.5575	10.8139	10.6294	10.617	10.3613	10.6335	10.6591	1805.1	1575.28	1570.95	1312.46	1579.42	1627.88	6152	chr3	101399934	101405563	562	-	protein_coding	.	P15283	ribosomal protein L24	NM_000986
967	RPL26	NM_000987	0.874558	0.0932088	10.7107	10.5174	10.7573	10.6605	10.7128	10.3285	10.6133	10.5932	1735.69	1609.55	1678.91	1282.96	1557.37	1555.1	6154	chr17	8280834	8286565	582	-	protein_coding	.	P14543	ribosomal protein L26	NM_000987
968	RPL27	NM_000988	0.880642	0.132227	9.78631	9.60294	9.91394	9.67377	9.76091	9.47638	9.62146	9.70199	966.898	811.74	867.448	710.251	782.623	838.009	6155	chr17	41150446	41154971	490	+	protein_coding	.	P6240	ribosomal protein L27	NM_000988
969	RPL30	NM_000989	0.869431	0.0999676	11.5479	11.3461	11.6547	11.4456	11.5357	11.1923	11.3994	11.4347	3233.96	2774.34	2970.83	2335.56	2686.34	2787.53	6156	chr8	99053938	99057818	554	-	protein_coding	.	P25390	ribosomal protein L30	NM_000989
970	RPL27A	NM_000990	0.842209	0.0431526	6.45491	6.20716	6.51895	6.43521	6.40826	6.06114	6.3495	6.1964	91.0046	85.1158	84.0136	65.6701	80.1291	72.8711	6157	chr11	8703995	8711419	4879	+	protein_coding	FLJ43464|MGC10850|MGC17878|MGC87238	P5915	ribosomal protein L27a	NM_000990
971	RPL28	NM_000991	0.859398	0.259125	6.74762	6.52902	6.89292	6.67365	6.6645	6.17738	6.6758	6.67855	118.23	100.589	100.538	71.2631	100.718	102.178	6158	chr19	55897300	55903451	5172	+	protein_coding	FLJ43307	P34596	ribosomal protein L28	NM_000991
972	RPL29	NM_000992	0.892082	0.204892	10.7013	10.5366	10.8349	10.6211	10.6381	10.3713	10.5588	10.6645	1831.56	1566.16	1594.15	1321.54	1499.63	1633.98	6159	chr3	52027644	52029958	695	-	protein_coding	HIP|HUMRPL29|MGC88589	P11124	ribosomal protein L29	NM_000992
973	RPL31	NM_000993	0.833419	0.0742379	10.5354	10.2725	10.6336	10.4778	10.4895	10.0827	10.2702	10.4423	1592.96	1418.03	1438.04	1081.78	1227.57	1400.6	6160	chr2	101618691	101636155	1203	+	protein_coding	MGC88191	P35245	ribosomal protein L31	NM_000993
974	RPL32	NM_000994	0.859407	0.131037	9.46859	9.25	9.56516	9.45989	9.37437	9.03278	9.40259	9.29015	759.042	699.761	663.329	521.983	672.323	629.653	6161	chr3	12876444	12883081	1651	-	protein_coding	.	P6686	ribosomal protein L32	NM_000994
975	RPL34	NM_000995	0.80428	0.0414597	8.19016	7.87593	8.29079	8.16516	8.10847	7.67062	7.93979	7.99681	313.199	284.644	275.253	202.439	243.273	256.306	6164	chr4	109541722	109551639	1022	+	protein_coding	MGC111005	P27510	ribosomal protein L34	NM_000995
976	RPL35A	NM_000996	0.851618	0.0938155	10.7031	10.4714	10.7896	10.6064	10.7073	10.277	10.5048	10.6122	1775	1550.34	1672.58	1237.92	1444.54	1575.74	6165	chr3	197677052	197682721	483	+	protein_coding	DBA5	P21917	ribosomal protein L35a	NM_000996
977	RPL37	NM_000997	0.826256	0.0600471	8.97975	8.70441	9.06909	8.88437	8.97989	8.51095	8.84906	8.73304	537.892	469.241	504.398	363.249	457.769	427.633	6167	chr5	40831430	40835387	1570	-	protein_coding	DKFZp686G1699|MGC99572	P27529	ribosomal protein L37	NM_000997
978	RPL37A	NM_000998	0.81162	0.13457	11.9076	11.6064	12.0854	11.7555	11.862	11.3236	11.6876	11.7702	4359.12	3439.34	3724.85	2558.13	3280.47	3517.44	6168	chr2	217363520	217366188	418	+	protein_coding	MGC74786	P15529	ribosomal protein L37a	NM_000998
979	RPL38	NM_000999	0.866246	0.177631	10.2391	10.0319	10.2858	10.1828	10.2468	9.74648	10.1156	10.1952	1251.51	1155.57	1215.25	856.695	1102.72	1179.98	6169	chr17	72199795	72206019	357	+	protein_coding	.	P14182	ribosomal protein L38	NM_000999
980	RPL39	NM_001000	0.791021	0.0663502	11.3281	10.9899	11.4643	11.1748	11.3306	10.8117	10.9502	11.1831	2833.96	2299.37	2576.94	1793.69	1967.36	2341.14	6170	chrX	118920467	118925622	419	-	protein_coding	.	P7166	ribosomal protein L39	NM_001000
981	RPL36AL	NM_001001	0.902257	0.0678371	8.71611	8.56773	8.77627	8.66775	8.70218	8.47173	8.65133	8.57451	438.902	403.681	415.901	353.482	399.012	383.025	6166	chr14	50085406	50087403	577	-	protein_coding	MGC111574|RPL36A	P11162	ribosomal protein L36a like	NM_001001
982	ITSN1	NM_001001132	1.02938	0.239758	2.79988	2.84166	2.81771	2.78789	2.79387	2.8974	2.80926	2.81664	6.07083	5.87638	5.94072	6.44125	5.97777	6.09031	6453	chr21	35014784	35261609	7951	+	protein_coding	ITSN|MGC134948|MGC134949|SH3D1A|SH3P17	P19089	intersectin 1	NM_001001132
983	SLC2A9	NM_001001290	1.00517	0.373949	1.51676e-06	0.00744033	0	4.55028e-06	0	1.37935e-06	0.0222055	0	0	0	0	0	0.0153411	0	56606	chr4	9827848	10041872	2079	-	protein_coding	GLUT9|GLUTX|UAQTL2|URATv1	P21697	solute carrier family 2 member 9	NM_001001290
984	PRSS58	NM_001001317	1	1	0	0	0	0	0	0	0	0	0	0	0	0	0	0	136541	chr7	141951958	141957878	918	-	protein_coding	.	P14252	protease, serine 58	NM_001001317
985	ATP2B1	NM_001001323	0.944383	0.374019	0.0825787	2.33885e-05	0	0.23478	0	1.57826e-05	5.43825e-05	0	0	0.175767	0	0	0	0	490	chr12	89981826	90049844	6933	-	protein_coding	PMCA1|PMCA1kb	P31040	ATPase plasma membrane Ca2+ transporting 1	NM_001001323
986	SPINK14	NM_001001325	1.58453	0.373852	0.000170774	0.664226	0	0.000512261	0	1.46141	0.000535072	0	0	0	0	1.75224	0	0	408187	chr5	147549296	147554961	294	+	protein_coding	SPINK5L2	P9403	serine peptidase inhibitor, Kazal type 14 (putative)	NM_001001325
987	PRKCSH	NM_001001329	0.994744	0.990403	3.45913	3.45153	4.06513	1.27266	3.7906	3.23909	3.7192	3.35158	15.7846	1.39898	12.8498	8.42851	12.1109	9.27777	5589	chr19	11546078	11561782	3038	+	protein_coding	AGE-R2|G19P1|PCLD|PLD1	P12972	protein kinase C substrate 80K-H	NM_001001329
988	REEP3	NM_001001330	1.06336	0.320029	4.13973	4.22836	4.00015	4.13867	4.26796	4.19149	4.22519	4.2674	15.0537	16.5312	18.283	17.2451	17.6121	18.3908	221035	chr10	65281123	65384883	5205	+	protein_coding	C10orf74|MGC87479	P13359	receptor accessory protein 3	NM_001001330
989	ATP2B2	NM_001001331	0.982594	0.374011	0.0258605	0.000528176	0.0752411	0.000535252	0.000508013	0.000555898	0.000560557	0.00046807	0.0538159	0.000352669	0.00035576	0.000379698	0.000369096	0.000351412	491	chr3	10365707	10547268	8962	-	protein_coding	PMCA2|PMCA2a|PMCA2i	P29526	ATPase plasma membrane Ca2+ transporting 2	NM_001001331
990	BLOC1S2	NM_001001342	0.841763	0.451298	0.934864	0.68635	0.945865	0.967135	0.890512	1.18492	0.0421913	0.608272	0.929468	0.950243	0.8547	1.27184	0.0284137	0.529577	282991	chr10	102033035	102046469	2849	-	protein_coding	BLOS2|FLJ30135|MGC10120|RP11-316M21.4	P10457	biogenesis of lysosomal organelles complex 1 subunit 2	NM_001001342
991	FNDC9	NM_001001343	0.95904	0.0678264	0.0811517	0.0208149	0.0856148	0.101304	0.0561728	1.95288e-05	6.72909e-05	0.0614816	0.0614719	0.0721914	0.0397766	0	0	0.044126	408263	chr5	156768607	156772729	2126	-	protein_coding	.	P10214	fibronectin type III domain containing 9	NM_001001343
992	ATP2B3	NM_001001344	0.992973	0.123052	0.0101766	2.84228e-06	0.0132128	6.32708e-06	0.0172543	1.91797e-06	6.60885e-06	0	0.00927473	0	0.0120579	0	0	0	492	chrX	152801580	152848387	6574	+	protein_coding	PMCA3|PMCA3a	P833	ATPase plasma membrane Ca2+ transporting 3	NM_001001344
993	CLDN20	NM_001001346	1.13785	0.549306	0.828039	1.01435	0.434768	0.872864	1.09951	0.533313	1.1234	1.28341	0.353759	0.826634	1.1439	0.44621	1.17274	1.44345	49861	chr6	155585147	155597682	1209	+	protein_coding	.	P30716	claudin 20	NM_001001346
994	NKIRAS2	NM_001001349	1	1	0	0	0	0	0	0	0	0	0	0	0	0	0	0	28511	chr17	40169594	40177656	2552	+	protein_coding	DKFZp434N1526|KBRAS2|MGC74742|kappaB-Ras2	P8950	NFKB inhibitor interacting Ras like 2	NM_001001349
995	CD44	NM_001001389	1.26874	0.389078	1.29468	1.63808	1.50911	1.5309	0.699236	1.93793	1.78938	1.03513	1.85267	1.88016	0.624713	2.82793	2.44517	1.05974	960	chr11	35160417	35253949	6706	+	protein_coding	CDW44|CSPG8|ECMR-III|HCELL|HUTCH-I|IN|LHR|MC56|MDU2|MDU3|MGC10468|MIC4|Pgp1	P7656	CD44 molecule (Indian blood group)	NM_001001389
996	CD44	NM_001001390	1.25614	0.078796	2.39706	2.72606	2.27488	2.4693	2.4395	2.6001	2.6099	2.94139	3.85398	4.51421	4.42905	5.05564	5.07822	6.72594	960	chr11	35160417	35253949	6706	+	protein_coding	CDW44|CSPG8|ECMR-III|HCELL|HUTCH-I|IN|LHR|MC56|MDU2|MDU3|MGC10468|MIC4|Pgp1	P7656	CD44 molecule (Indian blood group)	NM_001001390
997	CD44	NM_001001391	1.39354	0.275612	0.268179	0.746932	0.396875	0.000767303	0.373703	1.15979	0.84833	0	0.31812	0	0.296084	1.23286	0.796689	0.000223901	960	chr11	35160417	35253949	6706	+	protein_coding	CDW44|CSPG8|ECMR-III|HCELL|HUTCH-I|IN|LHR|MC56|MDU2|MDU3|MGC10468|MIC4|Pgp1	P7656	CD44 molecule (Indian blood group)	NM_001001391
998	CD44	NM_001001392	1	1	0	0	0	0	0	0	0	0	0	0	0	0	0	0	960	chr11	35160417	35253949	6706	+	protein_coding	CDW44|CSPG8|ECMR-III|HCELL|HUTCH-I|IN|LHR|MC56|MDU2|MDU3|MGC10468|MIC4|Pgp1	P7656	CD44 molecule (Indian blood group)	NM_001001392
999	DNAJB3	NM_001001394	0.91378	0.258809	0.209294	0.079212	0.0777893	0.259158	0.282365	0.225505	0.000196231	0	0.0557774	0.195614	0.216427	0.168863	0	0	414061	chr2	234651396	234652661	1266	-	protein_coding	HCG3|MGC26879	P6649	DnaJ heat shock protein family (Hsp40) member B3	NM_001001394
1000	LMO3	NM_001001395	0.999998	0.000107523	2.25426e-06	6.23263e-10	2.354e-06	2.44515e-06	1.96364e-06	4.20578e-10	1.44921e-09	0	1.66824e-06	1.63874e-06	1.37007e-06	0	0	0	55885	chr12	16701306	16761148	4841	-	protein_coding	DAT1|MGC26081|RBTN3|RBTNL2|RHOM3|Rhom-3	P28821	LIM domain only 3	NM_001001395
1001	ATP2B4	NM_001001396	0.986612	0.922667	0.181965	0.16252	0.488623	0.000224773	3.41245e-05	6.81395e-05	0.235542	0.239185	0.404336	0	5.42633e-05	0	0.176166	0.182029	493	chr1	203595915	203713209	8920	+	protein_coding	ATP2B2|DKFZp686G08106|DKFZp686M088|MXRA1|PMCA4|PMCA4b|PMCA4x	P1996	ATPase plasma membrane Ca2+ transporting 4	NM_001001396
1002	TSR3	NM_001001410	0.794444	0.0415665	6.17613	5.84414	6.35509	6.07256	6.08256	5.7644	5.88779	5.87703	81.1223	65.9753	66.8331	53.2756	57.9074	58.2011	115939	chr16	1399241	1401873	1204	-	protein_coding	.	P13598	TSR3, acp transferase ribosome maturation factor	NM_001001410
1003	ZNF676	NM_001001411	0.992892	0.373887	0.0102936	2.88025e-06	0.0306566	6.41161e-06	0	1.94359e-06	6.69715e-06	0	0.0216177	0	0	0	0	0	163223	chr19	22361903	22379753	2934	-	protein_coding	.	P16468	zinc finger protein 676	NM_001001411
1004	CALHM1	NM_001001412	1.01001	0.888561	0.206727	0.221092	0.0862688	0.371504	0.146499	0.210542	0.289771	0.159986	0.0620726	0.292118	0.107055	0.156786	0.221036	0.118683	255022	chr10	105213144	105218648	3056	-	protein_coding	FAM26C|MGC39514|MGC39617	P3527	calcium homeostasis modulator 1	NM_001001412
1005	GOLGA6L1	NM_001001413	1	1	0	0	0	0	0	0	0	0	0	0	0	0	0	0	283767	chr15	22736246	22736534	289	+	protein_coding	FLJ36131|FLJ40198	P203	golgin A6 family-like 1	NM_001001413
1006	NCCRP1	NM_001001414	0.952006	0.585726	1.94913	1.87817	2.11432	1.9401	1.77276	1.77943	1.84611	2.00003	3.34039	2.82307	2.41961	2.42893	2.58111	3.02203	342897	chr19	39687604	39692522	1973	+	protein_coding	NCCRP-1	P7226	non-specific cytotoxic cell receptor protein 1 homolog (zebrafish)	NM_001001414
1007	ZNF429	NM_001001415	1.14512	0.179451	2.32789	2.52339	2.13159	2.32483	2.50334	2.62083	2.53794	2.40307	3.3948	3.98917	4.67444	5.1437	4.78327	4.32171	353088	chr19	21688437	21721079	2361	+	protein_coding	.	P32042	zinc finger protein 429	NM_001001415
1008	TBC1D3B	NM_001001417	1	1	0	0	0	0	0	0	0	0	0	0	0	0	0	0	414059	chr17	34797172	34798054	883	-	protein_coding	FLJ78399|PRC17|TBC1D3I	P30864	TBC1 domain family member 3B	NM_001001417
1009	TBC1D3C	NM_001001418	0.999988	0.949063	0.000190711	0.0001732	0	0.000572057	0	6.66832e-08	0.000519471	0	0	0.000388863	0	0	0.000352695	0	414060	chr17	36283977	36284115	139	+	protein_coding	FLJ78248|MGC44903|TBC1D3D	P16350	TBC1 domain family member 3C	NM_001001418
1010	TBC1D3C	NM_001001418_1	1	0.534739	3.0212e-06	5.8782e-06	9.05799e-06	5.59062e-09	0	8.70563e-06	5.83959e-09	8.9231e-06	6.40533e-06	0	0	5.97926e-06	0	6.46157e-06	414060	chr17	36283977	36284115	139	+	protein_coding	FLJ78248|MGC44903|TBC1D3D	P16350	TBC1 domain family member 3C	NM_001001418_1
1011	SMAD5	NM_001001419	0.676549	0.0171691	0.984159	0.420424	0.889103	1.17683	0.865248	0.375188	0.291337	0.579355	0.854859	1.25558	0.822458	0.29626	0.221512	0.498898	4090	chr5	135468534	135518422	7097	+	protein_coding	DKFZp781C1895|DKFZp781O1323|Dwfc|JV5-1|MADH5	P32353	SMAD family member 5	NM_001001419
1012	SMAD5	NM_001001420	1.0056	0.931907	2.30878	2.31683	2.21386	2.40108	2.30531	2.45037	2.23679	2.2534	3.65196	4.2611	3.94662	4.45907	3.6934	3.79697	4090	chr5	135468534	135518422	7097	+	protein_coding	DKFZp781C1895|DKFZp781O1323|Dwfc|JV5-1|MADH5	P32353	SMAD family member 5	NM_001001420
1013	TNNT2	NM_001001430	0.999937	0.3365	9.15676e-05	2.54995e-08	1.55379e-05	5.67636e-08	0.000259094	1.72071e-08	5.92915e-08	0	1.10003e-05	0	0.000180352	0	0	0	7139	chr1	201328136	201346828	1363	-	protein_coding	CMH2|CMPD2|LVNC6|MGC3889|RCM3|TnTC|cTnT	P27646	troponin T2, cardiac type	NM_001001430
1014	TNNT2	NM_001001431	1.08621	0.387397	0.0040162	0.123322	0	8.22464e-05	0.0119336	0.000112696	8.59091e-05	0.34208	2.34838e-05	0	0.00833646	6.03956e-05	0	0.269487	7139	chr1	201328136	201346828	1363	-	protein_coding	CMH2|CMPD2|LVNC6|MGC3889|RCM3|TnTC|cTnT	P27646	troponin T2, cardiac type	NM_001001431
1015	TNNT2	NM_001001432	0.882533	0.373888	0.180332	5.30905e-05	0	0.00011818	0.484758	3.58254e-05	0.000123443	0	5.04817e-05	0	0.399679	0	0	0	7139	chr1	201328136	201346828	1363	-	protein_coding	CMH2|CMPD2|LVNC6|MGC3889|RCM3|TnTC|cTnT	P27646	troponin T2, cardiac type	NM_001001432
1016	STX16	NM_001001433	0.911944	0.797306	2.64355	2.51056	2.86928	2.71072	2.29056	1.44551	2.38198	3.19522	6.32644	5.51987	3.89667	1.71933	4.18891	8.20975	8675	chr20	57226309	57254582	4258	+	protein_coding	MGC90328|SYN16|hsyn16	.	syntaxin 16	NM_001001433
1017	C16orf87	NM_001001436	0.946838	0.571176	2.94858	2.86977	2.73416	2.97259	3.11378	2.76273	2.9826	2.85551	5.67384	6.81588	7.6635	5.7776	6.86884	6.2848	388272	chr16	46835959	46865074	1383	-	protein_coding	MGC62018	P26013	chromosome 16 open reading frame 87	NM_001001436
1018	CCL3L3	NM_001001437	1	1	0	0	0	0	0	0	0	0	0	0	0	0	0	0	414062	chr17	34522268	34625721	1433	-	protein_coding	464.2|CCL3L1|D17S1718|LD78|LD78BETA|MGC12815|SCYA3L|SCYA3L1	P11846	C-C motif chemokine ligand 3 like 3	NM_001001437
1019	CCL3L3	NM_001001437_1	1	1	0	0	0	0	0	0	0	0	0	0	0	0	0	0	414062	chr17	34522268	34625721	1433	-	protein_coding	464.2|CCL3L1|D17S1718|LD78|LD78BETA|MGC12815|SCYA3L|SCYA3L1	P11846	C-C motif chemokine ligand 3 like 3	NM_001001437_1
1020	LSS	NM_001001438	0.991496	0.952321	1.02217	1.00985	1.18478	0.615575	1.19374	1.15546	0.939418	0.92279	1.27743	0.528233	1.28866	1.22573	0.912357	0.903384	4047	chr21	47608360	47648738	4880	-	protein_coding	FLJ25486|FLJ35015|FLJ39450|FLJ46393|OSC	P35465	lanosterol synthase (2,3-oxidosqualene-lanosterol cyclase)	NM_001001438
1021	SLC35E4	NM_001001479	0.948832	0.585714	1.62865	1.55288	1.6504	1.49599	1.72985	1.72212	1.33655	1.57404	2.14643	1.81078	2.31911	2.29584	1.51615	1.99264	339665	chr22	31031793	31043862	2542	+	protein_coding	MGC129826	P21737	solute carrier family 35 member E4	NM_001001479
1022	KRTAP5-5	NM_001001480	1	1	0	0	0	0	0	0	0	0	0	0	0	0	0	0	439915	chr11	1651033	1652159	1127	+	protein_coding	KRTAP5-11|KRTAP5.5	P2786	keratin associated protein 5-5	NM_001001480
1023	UBE2W	NM_001001481	0.720848	0.203555	0.873506	0.401274	0.415758	1.23389	0.856249	0.000661686	0.50288	0.627161	0.335666	1.3468	0.811088	0.000247658	0.414157	0.549239	55284	chr8	74692332	74791145	9088	-	protein_coding	FLJ11011|hUBC-16	P28607	ubiquitin conjugating enzyme E2 W (putative)	NM_001001481
1024	ZDHHC13	NM_001001483	1.29447	0.363071	1.67955	2.05191	1.98623	1.09656	1.81122	2.28654	2.29022	1.41657	2.97173	1.12971	2.51195	3.87373	3.87368	1.68526	54503	chr11	19138692	19197967	2434	+	protein_coding	FLJ10852|FLJ10941|HIP14L|HIP3RP|MGC64994	P18661	zinc finger DHHC-type containing 13	NM_001001483
1025	PTER	NM_001001484	1.21958	0.60743	1.50769	1.79408	0.803081	1.33034	2.09465	2.20719	1.97995	0.88073	0.749204	1.50547	3.27394	3.61326	2.93104	0.851548	9317	chr10	16478942	16555744	3905	+	protein_coding	RPR-1	P10713	phosphotriesterase related	NM_001001484
1026	ATP2C1	NM_001001485	1.2408	0.220271	1.7783	2.08957	1.97577	1.82728	1.48985	1.81599	2.04775	2.35417	2.94328	2.53508	1.8108	2.51692	3.11867	4.13964	27032	chr3	130569369	130735555	5211	+	protein_coding	ATP2C1A|BCPM|HHD|KIAA1347|PMR1|SPCA1|hSPCA1	P34241	ATPase secretory pathway Ca2+ transporting 1	NM_001001485
1027	ATP2C1	NM_001001486	1.00873	0.981677	2.48832	2.50086	2.24474	2.93103	2.1595	1.28256	3.06445	2.62819	3.75337	6.59762	3.47144	1.42892	7.33318	5.21957	27032	chr3	130569369	130735555	5211	+	protein_coding	ATP2C1A|BCPM|HHD|KIAA1347|PMR1|SPCA1|hSPCA1	P34241	ATPase secretory pathway Ca2+ transporting 1	NM_001001486
1028	ATP2C1	NM_001001487	1.16191	0.713532	2.2135	2.43	2.25633	1.93101	2.41224	3.17812	1.6164	2.01773	3.7909	2.7967	4.32711	8.04183	2.05144	3.07522	27032	chr3	130569369	130735555	5211	+	protein_coding	ATP2C1A|BCPM|HHD|KIAA1347|PMR1|SPCA1|hSPCA1	P34241	ATPase secretory pathway Ca2+ transporting 1	NM_001001487
1029	SNCB	NM_001001502	0.924384	0.373919	0.113502	6.6445e-05	0	0.00012299	0.316688	6.62376e-05	0.000133094	0	0	3.39298e-05	0.245703	3.03843e-05	3.85361e-05	3.11463e-05	6620	chr5	176047210	176057557	1450	-	protein_coding	.	P14122	synuclein beta	NM_001001502
1030	NDUFV3	NM_001001503	0.945001	0.639875	5.08899	5.00738	5.14203	5.16809	4.94689	4.6719	5.15412	5.14544	34.4236	34.7843	29.8725	24.4519	34.4316	34.6441	4731	chr21	44313378	44329773	2130	+	protein_coding	CI-10k|CI-9KD	P19442	NADH:ubiquinone oxidoreductase subunit V3	NM_001001503
1031	HDGFRP2	NM_001001520	1.08358	0.144871	4.73264	4.84844	4.79323	4.75204	4.64884	4.93865	4.81733	4.78475	26.8163	25.8176	24.1102	29.6242	27.0544	26.7606	84717	chr19	4472193	4502232	2688	+	protein_coding	HDGF2|MGC2641	P4687	hepatoma-derived growth factor-related protein 2	NM_001001520
1032	UGP2	NM_001001521	1.00437	0.877962	5.10079	5.10707	5.14825	5.11799	5.0337	5.13612	5.11051	5.07391	34.5774	33.5607	31.7872	34.1153	33.3745	32.9239	7360	chr2	64068098	64118696	2437	+	protein_coding	UDPG|UDPGP2|UGPP2|pHC379	P17954	UDP-glucose pyrophosphorylase 2	NM_001001521
1033	TAGLN	NM_001001522	0.898826	0.226085	0.309534	0.155648	0.360321	0.148329	0.406999	9.45316e-05	0.235186	0.219886	0.284779	0.107356	0.326259	0	0.175789	0.166381	6876	chr11	117070040	117075508	1160	+	protein_coding	DKFZp686B01212|DKFZp686P11128|SM22|SMCC|TAGLN1|WS3-10	P32735	transgelin	NM_001001522
1034	RORC	NM_001001523	0.755576	0.374845	0.406456	0.00210472	0.981692	0.000867152	0.00129454	0.000168023	0.000436878	0.0057025	0.976934	0.000392961	0.000939955	5.53017e-05	9.12474e-05	0.0043462	6097	chr1	151778547	151804348	3214	-	protein_coding	MGC129539|NR1F3|RORG|RZR-GAMMA|RZRG|TOR	P14225	RAR related orphan receptor C	NM_001001523
1035	TM6SF2	NM_001001524	1	1	0	0	0	0	0	0	0	0	0	0	0	0	0	0	53345	chr19	19375174	19384074	1483	-	protein_coding	KIAA1926	P20766	transmembrane 6 superfamily member 2	NM_001001524
1036	CD36	NM_001001547	1.17225	0.137608	5.07028e-05	0.229332	0	0.000152103	0	0.260368	0.399545	0	0	0	0	0.19744	0.317515	0	948	chr7	80231504	80308593	5836	+	protein_coding	CHDS7|FAT|GP3B|GP4|GPIV|PASIV|SCARB3	P34851	CD36 molecule	NM_001001547
1037	CD36	NM_001001548	1.00921	0.501518	0.212906	0.226128	0.228277	0.179102	0.230753	0.213712	0.236305	0.228278	0.172226	0.131164	0.173678	0.159326	0.17672	0.173184	948	chr7	80231504	80308593	5836	+	protein_coding	CHDS7|FAT|GP3B|GP4|GPIV|PASIV|SCARB3	P34851	CD36 molecule	NM_001001548
1038	GRB10	NM_001001549	1.00001	0.913313	7.55456e-05	8.90723e-05	0.000226521	1.03935e-07	0	3.15063e-08	1.08563e-07	0.00026706	0.000159339	0	0	0	0	0.000191029	2887	chr7	50657760	50861159	5276	-	protein_coding	GRB-IR|Grb-10|IRBP|KIAA0207|MEG1|RSS	P19695	growth factor receptor bound protein 10	NM_001001549
1039	GRB10	NM_001001550	1.03225	0.810503	0.240698	0.286497	0.301632	0.00107937	0.391115	0.000107277	0.479441	0.338849	0.233521	0.000493509	0.311741	0	0.392155	0.267082	2887	chr7	50657760	50861159	5276	-	protein_coding	GRB-IR|Grb-10|IRBP|KIAA0207|MEG1|RSS	P19695	growth factor receptor bound protein 10	NM_001001550
1040	IDNK	NM_001001551	0.845637	0.635771	1.69393	1.45204	1.87633	1.78226	1.37576	2.04585	1.6223	0	2.67951	2.4282	1.59682	3.12517	2.06772	7.98114e-05	414328	chr9	86237964	86259045	1225	+	protein_coding	.	.	idnK, gluconokinase homolog (E. coli)	NM_001001551
1041	LEMD1	NM_001001552	1	1	0	0	0	0	0	0	0	0	0	0	0	0	0	0	93273	chr1	205350506	205391214	961	-	protein_coding	CT50|LEMP-1	P27002	LEM domain containing 1	NM_001001552
1042	GRB10	NM_001001555	1.06074	0.695069	1.80602	1.89109	1.52597	1.74644	2.08923	2.10419	1.72365	1.81771	1.88729	2.34276	3.25815	3.29497	2.28976	2.54463	2887	chr7	50657760	50861159	5276	-	protein_coding	GRB-IR|Grb-10|IRBP|KIAA0207|MEG1|RSS	P19695	growth factor receptor bound protein 10	NM_001001555
1043	GALK2	NM_001001556	0.741485	0.0682841	1.92588	1.49437	2.1518	1.82963	1.76586	1.62904	1.24382	1.58059	3.45382	2.54197	2.40313	2.08967	1.35889	2.00716	2585	chr15	49447956	49622002	3701	+	protein_coding	GK2|MGC1745	P22136	galactokinase 2	NM_001001556
1044	GDF6	NM_001001557	1.00795	0.37381	2.39027e-06	0.011423	0	7.17078e-06	0	2.17372e-06	7.49013e-06	0.0339916	0	0	0	0	0	0.0241779	392255	chr8	97154558	97173020	3701	-	protein_coding	BMP13|CDMP2|KFS|KFSL|MCOP4|MGC158100|MGC158101|SCDO4|SGM1	P31416	growth differentiation factor 6	NM_001001557
1045	GGA1	NM_001001560	1.06859	0.661941	0.093878	0.189587	0.26493	0.000183543	0	5.56403e-05	0.506375	0.00114747	0.202372	0	0	0	0.418575	0.00101001	26088	chr22	38004481	38029571	3624	+	protein_coding	.	P34151	golgi-associated, gamma adaptin ear containing, ARF binding protein 1	NM_001001560
1046	TIMM50	NM_001001563	0.853315	0.0641287	5.24399	5.01514	5.32517	5.30891	5.0857	4.97363	5.09756	4.97055	39.217	38.4541	32.9904	30.3738	33.0665	30.5819	92609	chr19	39971052	39981528	2572	+	protein_coding	MGC102733|TIM50|TIM50L	P9720	translocase of inner mitochondrial membrane 50	NM_001001563
1047	PDE9A	NM_001001567	1.07714	0.731219	1.71304	1.82025	1.24232	1.86619	1.93511	2.07022	1.9506	1.33881	1.37193	2.63274	2.82668	3.19513	2.8512	1.54381	5152	chr21	44073862	44195618	2215	+	protein_coding	FLJ90181|HSPDE9A2	P20448	phosphodiesterase 9A	NM_001001567
1048	PDE9A	NM_001001568	0.91081	0.832598	0.559285	0.424506	1.27341	0.000838782	0.00391686	0.000216317	0.000745282	1.0184	1.42058	8.48097e-05	0.00282348	0	0	1.03165	5152	chr21	44073862	44195618	2215	+	protein_coding	FLJ90181|HSPDE9A2	P20448	phosphodiesterase 9A	NM_001001568
1049	PDE9A	NM_001001569	1.24264	0.373811	7.19199e-05	0.313476	0	0.000215749	0	6.54036e-05	0.000225357	0.789014	8.04108e-05	0	0	0	0	0.731721	5152	chr21	44073862	44195618	2215	+	protein_coding	FLJ90181|HSPDE9A2	P20448	phosphodiesterase 9A	NM_001001569
1050	PDE9A	NM_001001570	1	1	0	0	0	0	0	0	0	0	0	0	0	0	0	0	5152	chr21	44073862	44195618	2215	+	protein_coding	FLJ90181|HSPDE9A2	P20448	phosphodiesterase 9A	NM_001001570
1051	PDE9A	NM_001001571	1.00098	0.25537	2.87593e-07	0.00141125	0	8.6278e-07	0	0.000170058	0.00352567	0.000535662	0	0	0	0.000116911	0.00240868	0.00038294	5152	chr21	44073862	44195618	2215	+	protein_coding	FLJ90181|HSPDE9A2	P20448	phosphodiesterase 9A	NM_001001571
1052	PDE9A	NM_001001572	1	1	0	0	0	0	0	0	0	0	0	0	0	0	0	0	5152	chr21	44073862	44195618	2215	+	protein_coding	FLJ90181|HSPDE9A2	P20448	phosphodiesterase 9A	NM_001001572
1053	PDE9A	NM_001001573	0.993	0.373888	0.0101373	2.82328e-06	0	6.28479e-06	0.0301944	1.90515e-06	6.56467e-06	0	0	0	0.02119	0	0	0	5152	chr21	44073862	44195618	2215	+	protein_coding	FLJ90181|HSPDE9A2	P20448	phosphodiesterase 9A	NM_001001573
1054	PDE9A	NM_001001574	1	1	0	0	0	0	0	0	0	0	0	0	0	0	0	0	5152	chr21	44073862	44195618	2215	+	protein_coding	FLJ90181|HSPDE9A2	P20448	phosphodiesterase 9A	NM_001001574
1055	PDE9A	NM_001001575	0.999982	0.373887	2.55486e-05	7.11179e-09	0	1.58313e-08	7.66287e-05	4.79904e-09	1.65363e-08	0	0	0	5.33679e-05	0	0	0	5152	chr21	44073862	44195618	2215	+	protein_coding	FLJ90181|HSPDE9A2	P20448	phosphodiesterase 9A	NM_001001575
1056	PDE9A	NM_001001576	1	1	0	0	0	0	0	0	0	0	0	0	0	0	0	0	5152	chr21	44073862	44195618	2215	+	protein_coding	FLJ90181|HSPDE9A2	P20448	phosphodiesterase 9A	NM_001001576
1057	PDE9A	NM_001001577	1	1	0	0	0	0	0	0	0	0	0	0	0	0	0	0	5152	chr21	44073862	44195618	2215	+	protein_coding	FLJ90181|HSPDE9A2	P20448	phosphodiesterase 9A	NM_001001577
1058	PDE9A	NM_001001578	1.11921	0.37381	3.54827e-05	0.162513	0	0.000106445	0	3.2268e-05	0.000111186	0.441065	0	0	0	0	0	0.359924	5152	chr21	44073862	44195618	2215	+	protein_coding	FLJ90181|HSPDE9A2	P20448	phosphodiesterase 9A	NM_001001578
1059	PDE9A	NM_001001579	1	1	0	0	0	0	0	0	0	0	0	0	0	0	0	0	5152	chr21	44073862	44195618	2215	+	protein_coding	FLJ90181|HSPDE9A2	P20448	phosphodiesterase 9A	NM_001001579
1060	PDE9A	NM_001001580	1	1	0	0	0	0	0	0	0	0	0	0	0	0	0	0	5152	chr21	44073862	44195618	2215	+	protein_coding	FLJ90181|HSPDE9A2	P20448	phosphodiesterase 9A	NM_001001580
1061	PDE9A	NM_001001581	1.10544	0.37381	3.14024e-05	0.144648	0	9.42053e-05	0	2.85574e-05	9.84005e-05	0.396482	0	0	0	0	0	0.318425	5152	chr21	44073862	44195618	2215	+	protein_coding	FLJ90181|HSPDE9A2	P20448	phosphodiesterase 9A	NM_001001581
1062	PDE9A	NM_001001582	1.0554	0.362977	1.65407e-05	0.0778108	0	4.96215e-05	0	1.50422e-05	0.00404664	0.21838	0	0	0	0	0.00273102	0.164782	5152	chr21	44073862	44195618	2215	+	protein_coding	FLJ90181|HSPDE9A2	P20448	phosphodiesterase 9A	NM_001001582
1063	PDE9A	NM_001001583	1	1	0	0	0	0	0	0	0	0	0	0	0	0	0	0	5152	chr21	44073862	44195618	2215	+	protein_coding	FLJ90181|HSPDE9A2	P20448	phosphodiesterase 9A	NM_001001583
1064	PDE9A	NM_001001584	1	1	0	0	0	0	0	0	0	0	0	0	0	0	0	0	5152	chr21	44073862	44195618	2215	+	protein_coding	FLJ90181|HSPDE9A2	P20448	phosphodiesterase 9A	NM_001001584
1065	PDE9A	NM_001001585	1.19823	0.522712	0.112552	0.373457	0	0.000331058	0.314043	0.000100361	0.915551	0	0	0	0.243474	0	0.883058	0	5152	chr21	44073862	44195618	2215	+	protein_coding	FLJ90181|HSPDE9A2	P20448	phosphodiesterase 9A	NM_001001585
1066	MED8	NM_001001653	1.08098	0.739814	0.606373	0.718718	0.548288	1.07377	0	0.477643	0.874798	0.774787	0.46432	1.10027	0	0.391651	0.829585	0.71639	112950	chr1	43849579	43855483	1478	-	protein_coding	ARC32|MGC17544|MGC19641	P28808	mediator complex subunit 8	NM_001001653
1067	ALKBH2	NM_001001655	0.868149	0.696814	1.68736	1.48337	0.422362	2.12621	1.98411	1.38502	1.19242	1.80361	0.343186	3.35184	2.95869	1.60897	1.27683	2.50827	121642	chr12	109525993	109531293	1186	-	protein_coding	ABH2|FLJ99103|MGC90512	P8894	alkB homolog 2, alpha-ketoglutarate-dependent dioxygenase	NM_001001655
1068	OR9A4	NM_001001656	1	1	0	0	0	0	0	0	0	0	0	0	0	0	0	0	130075	chr7	141618676	141619620	945	+	protein_coding	.	P27713	olfactory receptor family 9 subfamily A member 4	NM_001001656
1069	OR2Y1	NM_001001657	1	1	0	0	0	0	0	0	0	0	0	0	0	0	0	0	134083	chr5	180166123	180167058	936	-	protein_coding	OR5-2	P26167	olfactory receptor family 2 subfamily Y member 1	NM_001001657
1070	OR9A2	NM_001001658	1.03886	0.37381	1.16204e-05	0.0550083	0	3.48608e-05	0	1.05676e-05	3.64133e-05	0.159064	0	0	0	0	0	0.117634	135924	chr7	142723287	142724219	933	-	protein_coding	.	P13761	olfactory receptor family 9 subfamily A member 2	NM_001001658
1071	OR2A14	NM_001001659	1	1	0	0	0	0	0	0	0	0	0	0	0	0	0	0	135941	chr7	143826206	143827138	933	+	protein_coding	OR2A14P|OR2A6|OST182	P22680	olfactory receptor family 2 subfamily A member 14	NM_001001659
1072	LYRM5	NM_001001660	0.882783	0.14227	2.96448	2.78461	2.87705	2.90677	3.09937	2.88166	2.81191	2.65063	6.36785	6.46721	7.57734	6.36033	5.99008	5.32164	144363	chr12	25348150	25357949	1135	+	.	.	P33109	LYR motif containing 5	NM_001001660
1073	ZNF425	NM_001001661	0.977435	0.621902	2.01235	1.97943	1.99457	2.10779	1.929	1.92347	1.9797	2.03303	2.99519	3.29425	2.81077	2.78891	2.92842	3.11567	155054	chr7	148799878	148823438	3218	-	protein_coding	MGC150568	P19375	zinc finger protein 425	NM_001001661
1074	ZNF782	NM_001001662	0.962136	0.747011	2.00762	1.95194	1.96807	1.7857	2.23366	1.99847	1.76414	2.0753	2.92245	2.43438	3.70659	2.99118	2.38279	3.23773	158431	chr9	99579273	99616389	3313	-	protein_coding	FLJ16636	P15187	zinc finger protein 782	NM_001001662
1075	TMEM211	NM_001001663	1	1	0	0	0	0	0	0	0	0	0	0	0	0	0	0	255349	chr22	25331208	25335314	507	-	protein_coding	MGC163519|MGC163521|bA9F11.1	P23900	transmembrane protein 211	NM_001001663
1076	SPOPL	NM_001001664	1.0738	0.169353	4.33951	4.44223	4.21573	4.41127	4.38385	4.43849	4.47798	4.40938	17.6413	20.1777	19.8964	20.6521	21.1764	20.3988	339745	chr2	139259350	139330805	5734	+	protein_coding	FLJ53775	P17457	speckle type BTB/POZ protein like	NM_001001664
1077	CYP27C1	NM_001001665	0.989235	0.116836	0.0156192	4.33282e-06	0	0.0224312	0.0242997	2.92379e-06	1.00747e-05	0	0	0.0155023	0.0170206	0	0	0	339761	chr2	127941412	127963343	4685	-	protein_coding	FLJ16008	P30303	cytochrome P450 family 27 subfamily C member 1	NM_001001665
1078	ANO7	NM_001001666	1.08656	0.285275	0.0408436	0.160616	0.119098	0.000129968	0	3.9399e-05	0.298127	0.168281	0.0865072	0	0	0	0.228277	0.124963	50636	chr2	242127924	242164791	4588	+	protein_coding	D-TMPP|DTMPP|IPCA-5|IPCA5|NGEP|PCANAP5|PCANAP5L|TMEM16G	P32765	anoctamin 7	NM_001001666
1079	OR6V1	NM_001001667	0.973995	0.373887	0.0380246	1.07171e-05	0.111171	2.38569e-05	0	7.2319e-06	2.49193e-05	0	0.0804769	0	0	0	0	0	346517	chr7	142749438	142750379	942	+	protein_coding	GPR138	P23331	olfactory receptor family 6 subfamily V member 1	NM_001001667
1080	ZNF470	NM_001001668	1	1	0	0	0	0	0	0	0	0	0	0	0	0	0	0	388566	chr19	57078890	57094262	7141	+	protein_coding	CZF-1|FLJ26175|FLJ26846	P7004	zinc finger protein 470	NM_001001668
1081	ARHGEF37	NM_001001669	1.04547	0.355865	0.967265	1.03141	0.94107	0.925481	1.03289	1.09294	0.927416	1.06841	0.923409	0.894251	1.04719	1.13135	0.896566	1.10551	389337	chr5	148961135	149014527	4865	+	protein_coding	FLJ41603	P20915	Rho guanine nucleotide exchange factor 37	NM_001001669
1082	SPATA31D1	NM_001001670	1	1	0	0	0	0	0	0	0	0	0	0	0	0	0	0	389763	chr9	84603687	84610171	4833	+	protein_coding	.	P28408	SPATA31 subfamily D, member 1	NM_001001670
1083	MAP3K15	NM_001001671	1.1249	0.198771	0.494064	0.663861	0.368953	0.413264	0.679973	0.5509	0.717465	0.716915	0.292886	0.32937	0.602728	0.46416	0.640856	0.648558	389840	chrX	19378176	19533379	4633	-	protein_coding	ASK3|FLJ16518|bA723P2.3	P6851	mitogen-activated protein kinase kinase kinase 15	NM_001001671
1084	RNASE9	NM_001001673	1	1	0	0	0	0	0	0	0	0	0	0	0	0	0	0	390443	chr14	21024252	21029090	1283	-	protein_coding	HEL128|h461	P13309	ribonuclease A family member 9 (inactive)	NM_001001673
1085	OR4F15	NM_001001674	1	1	0	0	0	0	0	0	0	0	0	0	0	0	0	0	390649	chr15	102358390	102359328	939	+	protein_coding	.	P26184	olfactory receptor family 4 subfamily F member 15	NM_001001674
1086	LCN9	NM_001001676	1	1	0	0	0	0	0	0	0	0	0	0	0	0	0	0	392399	chr9	138555168	138557755	524	+	protein_coding	9230102I19Rik	P683	lipocalin 9	NM_001001676
1087	MED11	NM_001001683	0.890867	0.44501	4.1893	4.02258	4.46472	4.03147	4.02649	3.86884	3.92551	4.24435	21.1466	15.2756	15.3115	13.588	14.1185	18.082	400569	chr17	4634703	4636905	1531	+	protein_coding	MGC88387	P20893	mediator complex subunit 11	NM_001001683
1088	IL17REL	NM_001001694	0.994245	0.939422	0.220219	0.211892	0.206634	0.217924	0.235947	0.108902	0.404218	0.101436	0.154734	0.161923	0.177912	0.0781758	0.321621	0.0739341	400935	chr22	50432942	50451055	3635	-	protein_coding	FLJ41993	P1469	interleukin 17 receptor E-like	NM_001001694
1089	C4orf3	NM_001001701	1.42837	4.58972e-05	4.93003	5.4444	4.92483	4.97384	4.89018	5.41536	5.4674	5.44994	29.477	30.2699	28.6834	41.6152	43.0275	43.017	401152	chr4	120217574	120225600	2960	-	protein_coding	.	P2904	chromosome 4 open reading frame 3	NM_001001701
1090	C9orf170	NM_001001709	1	1	0	0	0	0	0	0	0	0	0	0	0	0	0	0	401535	chr9	89763559	89774641	3409	+	protein_coding	FLJ45537	P29160	chromosome 9 open reading frame 170	NM_001001709
1091	FAM166A	NM_001001710	0.836645	0.50015	3.0496	2.79229	2.84708	3.06471	3.21367	2.45274	3.37333	2.30584	6.21677	7.33168	8.28449	4.46665	9.31962	3.98074	401565	chr9	140138035	140142244	1148	-	protein_coding	FLJ40100	P12273	family with sequence similarity 166 member A	NM_001001710
1092	DDI1	NM_001001711	1.03289	0.373949	9.68467e-06	0.046699	0	2.90538e-05	0	8.80729e-06	0.135785	0	0	0	0	0	0.0980216	0	414301	chr11	103907308	103909922	2615	+	protein_coding	FLJ36017	P20783	DNA damage inducible 1 homolog 1	NM_001001711
1093	LCN10	NM_001001712	1.00338	0.933117	0.0365991	0.0414738	0	0.107124	0	1.46708e-05	0.120994	0	0	0.0765201	0	0	0.0868491	0	414332	chr9	139632619	139637411	2017	-	protein_coding	.	P6965	lipocalin 10	NM_001001712
1094	SH3BGR	NM_001001713	0.924943	0.754184	2.13684	2.02428	2.44133	2.20326	1.65872	2.06054	2.39789	1.46566	4.44467	3.58779	2.15991	3.16652	4.25025	1.77949	6450	chr21	40817797	40887433	1286	+	protein_coding	21-GARP	P28258	SH3 domain binding glutamate rich protein	NM_001001713
1095	FARP1	NM_001001715	1.05205	0.768236	0.350683	0.423885	0.0990268	0.340365	0.573729	0.00016389	0.555289	0.636942	0.0716766	0.264311	0.488844	0	0.466956	0.558949	10160	chr13	98794816	99102027	6135	+	protein_coding	CDEP|MGC87400|PLEKHC2	P26196	FERM, ARH/RhoGEF and pleckstrin domain protein 1	NM_001001715
1096	CDY2B	NM_001001722	1	1	0	0	0	0	0	0	0	0	0	0	0	0	0	0	203611	chrY	19990140	20139627	3920	-	protein_coding	CDY|CDY2|CDY2A|MGC163298|MGC163300	P23821	chromodomain protein, Y-linked, 2B	NM_001001722
1097	CDY2B	NM_001001722_1	1	1	0	0	0	0	0	0	0	0	0	0	0	0	0	0	203611	chrY	19990140	20139627	3920	-	protein_coding	CDY|CDY2|CDY2A|MGC163298|MGC163300	P23821	chromodomain protein, Y-linked, 2B	NM_001001722_1
1098	CC2D2B	NM_001001732	0.945374	0.22761	0.129555	0.0485121	0.147493	0.173376	0.0656161	3.45277e-05	0.000118972	0.140762	0.108151	0.126857	0.0466198	0	0	0.103576	387707	chr10	97759848	97792441	2114	+	protein_coding	C10orf130|FLJ12141|bA248J23.4	P13005	coiled-coil and C2 domain containing 2B	NM_001001732
1099	ATP1A4	NM_001001734	1	1	0	0	0	0	0	0	0	0	0	0	0	0	0	0	480	chr1	160121352	160156767	4101	+	protein_coding	ATP1A1|ATP1AL2|MGC25056	P33882	ATPase Na+/K+ transporting subunit alpha 4	NM_001001734
1100	RFWD2	NM_001001740	0.761066	0.185291	3.18267	2.78876	3.50875	3.19342	2.74615	2.82936	2.72664	2.80825	10.4129	8.10932	5.71524	6.09784	5.5873	6.05168	64326	chr1	175913962	176176380	2854	-	protein_coding	COP1|FLJ10416|RNF200	P31133	ring finger and WD repeat domain 2	NM_001001740
1101	BLID	NM_001001786	1	1	0	0	0	0	0	0	0	0	0	0	0	0	0	0	414899	chr11	121986062	121986923	862	-	protein_coding	BRCC2|MGC163233|MGC163235	P23436	BH3-like motif containing, cell death inducer	NM_001001786
1102	RAET1G	NM_001001788	0.957556	0.844816	0.257553	0.194982	0.665519	0.000301328	0	9.13481e-05	0.000314747	0.519891	0.587746	0	0	0	0	0.436831	353091	chr6	150238014	150244288	1081	-	protein_coding	ULBP5	.	retinoic acid early transcript 1G	NM_001001788
1103	TOMM5	NM_001001790	0.815566	0.0247406	6.84704	6.55291	6.90336	6.82782	6.80818	6.37285	6.61156	6.65838	119.097	112.048	111.17	81.7488	96.285	100.749	401505	chr9	37588412	37592636	1463	-	protein_coding	C9orf105|RP11-263I4.1|Tom5|bA613M10.3	P5385	translocase of outer mitochondrial membrane 5	NM_001001790
1104	C10orf55	NM_001001791	0.953552	0.519129	0.168238	0.0996214	0.106039	0.043277	0.338379	0.055032	0.141653	0.100878	0.0767136	0.030057	0.264603	0.0387455	0.102348	0.0733791	414236	chr10	75669727	75682535	2513	-	protein_coding	bA417O11.3	P3620	chromosome 10 open reading frame 55	NM_001001791
1105	DENND6B	NM_001001794	1.01561	0.877815	1.97975	2.0021	1.90483	2.08722	1.94066	2.22682	1.91362	1.83548	2.75436	3.23342	2.84169	3.67585	2.75241	2.58962	414918	chr22	50750392	50765489	2006	-	protein_coding	.	P30131	DENN domain containing 6B	NM_001001794
1106	C8orf82	NM_001001795	0.868196	0.0605378	5.08925	4.88535	5.18524	5.12931	4.94214	4.86146	4.87741	4.91661	35.499	33.8357	29.7709	28.0272	28.2442	29.4202	414919	chr8	145751603	145754458	1932	-	protein_coding	MGC70857	P4856	chromosome 8 open reading frame 82	NM_001001795
1107	OR2A42	NM_001001802	1.00682	0.895271	0.045194	0.0550028	0	0.131544	0	1.90698e-05	6.57094e-05	0.159015	0	0.0948098	0	0	0	0.117634	402317	chr7	143929004	143929936	933	-	protein_coding	OR2A1	P976	olfactory receptor family 2 subfamily A member 42	NM_001001802
1108	OR2T34	NM_001001821	1	1	0	0	0	0	0	0	0	0	0	0	0	0	0	0	127068	chr1	248737102	248738058	957	-	protein_coding	.	P30562	olfactory receptor family 2 subfamily T member 34	NM_001001821
1109	OR2T27	NM_001001824	1	1	0	0	0	0	0	0	0	0	0	0	0	0	0	0	403239	chr1	248813232	248814185	954	-	protein_coding	.	P15167	olfactory receptor family 2 subfamily T member 27	NM_001001824
1110	OR2T35	NM_001001827	1	1	0	0	0	0	0	0	0	0	0	0	0	0	0	0	403244	chr1	248801588	248802559	972	-	protein_coding	.	P124	olfactory receptor family 2 subfamily T member 35	NM_001001827
1111	STX19	NM_001001850	1.01317	0.854392	0.354805	0.373686	0.38963	0.449505	0.215129	0.46212	0.413696	0.235506	0.311322	0.36352	0.161067	0.376931	0.33006	0.179402	415117	chr3	93733215	93747454	1156	-	protein_coding	MGC21382	P25969	syntaxin 19	NM_001001850
1112	ITIH5	NM_001001851	1.02077	0.286779	0.00959954	0.0392639	0.0285792	3.04914e-05	0	9.24309e-06	0.0762512	0.0405232	0.0201526	0	0	0	0.0538268	0.0288971	80760	chr10	7601232	7708961	7835	-	protein_coding	DKFZp686F0145|ITI-HC5|MGC10848|pp14776	P33770	inter-alpha-trypsin inhibitor heavy chain family member 5	NM_001001851
1113	PIM3	NM_001001852	1.25125	0.0020689	5.12936	5.45273	5.19307	5.12229	5.07008	5.42977	5.5093	5.41738	35.7024	33.6598	32.6251	42.0425	44.3234	42.0391	415116	chr22	50354143	50357720	2379	+	protein_coding	pim-3	P4694	Pim-3 proto-oncogene, serine/threonine kinase	NM_001001852
1114	C14orf37	NM_001001872	0.94542	0.523798	0.439222	0.358248	0.29212	0.421977	0.588246	0.424843	0.441617	0.195415	0.225539	0.337731	0.503908	0.341808	0.355943	0.147007	145407	chr14	58470808	58618847	3082	-	protein_coding	c14_5376	P29678	chromosome 14 open reading frame 37	NM_001001872
1115	TPD52L3	NM_001001874	1	1	0	0	0	0	0	0	0	0	0	0	0	0	0	0	89882	chr9	6328349	6331900	2276	+	protein_coding	MGC26757|MGC45374|NYDSP25|hD55	P35657	tumor protein D52-like 3	NM_001001874
1116	TPD52L3	NM_001001875	1	1	0	0	0	0	0	0	0	0	0	0	0	0	0	0	89882	chr9	6328349	6331900	2276	+	protein_coding	MGC26757|MGC45374|NYDSP25|hD55	P35657	tumor protein D52-like 3	NM_001001875
1117	HSFY2	NM_001001877_1	1	1	0	0	0	0	0	0	0	0	0	0	0	0	0	0	159119	chrY	20708557	20935601	5208	+	protein_coding	FLJ25453|HSF2L|HSFY|HSFY1	.	heat shock transcription factor, Y-linked 2	NM_001001877_1
1118	VCX3B	NM_001001888	1	1	0	0	0	0	0	0	0	0	0	0	0	0	0	0	425054	chrX	8432871	8434551	1175	+	protein_coding	MGC119815|VCX-C|VCXC	P12649	variable charge, X-linked 3B	NM_001001888
1119	RUNX1	NM_001001890	1.28389	0.00528302	4.00476	4.36528	3.9028	4.04817	4.05814	4.30899	4.4482	4.33483	14.0071	15.4639	15.6735	18.7938	20.7266	19.3175	861	chr21	36160098	36421595	6387	-	protein_coding	AML1|AML1-EVI-1|AMLCR1|CBFA2|EVI-1|PEBP2aB	P5381	runt related transcription factor 1	NM_001001890
1120	ANO7	NM_001001891	1.12666	0.0561711	0.281042	0.45309	0.292036	0.361776	0.183764	0.424727	0.530445	0.400773	0.225437	0.283205	0.136083	0.341715	0.441978	0.323073	50636	chr2	242127924	242164791	4588	+	protein_coding	D-TMPP|DTMPP|IPCA-5|IPCA5|NGEP|PCANAP5|PCANAP5L|TMEM16G	P32765	anoctamin 7	NM_001001891
1121	TTC3	NM_001001894	1.05743	0.117216	5.19735	5.27791	5.13284	5.20386	5.25282	5.23604	5.30987	5.28683	34.2015	35.6788	37.1649	36.6331	38.4692	38.3171	7267	chr21	38445571	38575408	9101	+	protein_coding	DCRR1|DKFZp686M0150|RNF105|TPRDIII	P19383	tetratricopeptide repeat domain 3	NM_001001894
1122	UBASH3A	NM_001001895	1	0.939848	2.91588e-05	3.08698e-05	0	4.55022e-05	4.19736e-05	4.88135e-05	4.37954e-05	0	0	3.07158e-05	2.92443e-05	3.35694e-05	2.95244e-05	0	53347	chr21	43823971	43867790	2556	+	protein_coding	CLIP4|STS-2|TULA	P21141	ubiquitin associated and SH3 domain containing A	NM_001001895
1123	OR4E2	NM_001001912	1	1	0	0	0	0	0	0	0	0	0	0	0	0	0	0	26686	chr14	22133297	22134238	942	+	protein_coding	OR14-42	P2657	olfactory receptor family 4 subfamily E member 2	NM_001001912
1124	OR52N1	NM_001001913	1	1	0	0	0	0	0	0	0	0	0	0	0	0	0	0	79473	chr11	5809084	5810046	963	-	protein_coding	OR11-61	P10325	olfactory receptor family 52 subfamily N member 1	NM_001001913
1125	OR2G3	NM_001001914	1	1	0	0	0	0	0	0	0	0	0	0	0	0	0	0	81469	chr1	247768888	247769817	930	+	protein_coding	OR1-33	P34745	olfactory receptor family 2 subfamily G member 3	NM_001001914
1126	OR2G2	NM_001001915	1.0351	0.373949	1.03347e-05	0.0497765	0	3.1004e-05	0	9.39848e-06	0.144447	0	0	0	0	0	0.104607	0	81470	chr1	247751662	247752615	954	+	protein_coding	OR1-32	P33600	olfactory receptor family 2 subfamily G member 2	NM_001001915
1127	OR52J3	NM_001001916	1	1	0	0	0	0	0	0	0	0	0	0	0	0	0	0	119679	chr11	5067756	5068691	936	+	protein_coding	OR11-32	P19101	olfactory receptor family 52 subfamily J member 3	NM_001001916
1128	OR56A1	NM_001001917	1	1	0	0	0	0	0	0	0	0	0	0	0	0	0	0	120796	chr11	6047901	6048971	1071	-	protein_coding	OR11-75	P18285	olfactory receptor family 56 subfamily A member 1	NM_001001917
1129	OR14C36	NM_001001918	1	1	0	0	0	0	0	0	0	0	0	0	0	0	0	0	127066	chr1	248512077	248513015	939	+	protein_coding	OR5BF1	P14148	olfactory receptor family 14 subfamily C member 36	NM_001001918
1130	OR13C4	NM_001001919	1	1	0	0	0	0	0	0	0	0	0	0	0	0	0	0	138804	chr9	107288534	107289490	957	-	protein_coding	HSHTPCRX17|HTPCRX17|OR2K1|OR37F|OR9-7	P3554	olfactory receptor family 13 subfamily C member 4	NM_001001919
1131	OR4C15	NM_001001920	1	1	0	0	0	0	0	0	0	0	0	0	0	0	0	0	81309	chr11	55321783	55322895	1113	+	protein_coding	OR11-127|OR11-134	P6381	olfactory receptor family 4 subfamily C member 15	NM_001001920
1132	OR5AS1	NM_001001921	1	1	0	0	0	0	0	0	0	0	0	0	0	0	0	0	219447	chr11	55797895	55798869	975	+	protein_coding	OR11-168	P15106	olfactory receptor family 5 subfamily AS member 1	NM_001001921
1133	OR52N5	NM_001001922	1	1	0	0	0	0	0	0	0	0	0	0	0	0	0	0	390075	chr11	5798864	5799897	1034	-	protein_coding	OR11-62|OR52N5Q	P25147	olfactory receptor family 52 subfamily N member 5	NM_001001922
1134	OR5C1	NM_001001923	1.03729	0.37381	1.11536e-05	0.0528305	0	3.34604e-05	0	1.01431e-05	3.49505e-05	0.152979	0	0	0	0	0	0.112904	392391	chr9	125551212	125552174	963	+	protein_coding	OR5C2P|OR9-31|OR9-F	P31491	olfactory receptor family 5 subfamily C member 1	NM_001001923
1135	MTUS1	NM_001001924	1.03137	0.416545	1.5257	1.57026	1.57059	1.55269	1.45096	1.5935	1.61105	1.50396	1.97702	1.9237	1.73573	2.01471	2.04401	1.85061	57509	chr8	17501303	17658426	7565	-	protein_coding	ATBP|ATIP|DKFZp586D1519|DKFZp686F20243|FLJ14295|KIAA1288|MP44|MTSG1	P28037	microtubule associated tumor suppressor 1	NM_001001924
1136	MTUS1	NM_001001925	1.00319	0.9822	1.37432	1.37892	1.02976	1.48714	1.55206	1.2597	1.59571	1.25418	1.04617	1.79447	1.93415	1.39212	2.01258	1.39678	57509	chr8	17501303	17658426	7565	-	protein_coding	ATBP|ATIP|DKFZp586D1519|DKFZp686F20243|FLJ14295|KIAA1288|MP44|MTSG1	P28037	microtubule associated tumor suppressor 1	NM_001001925
1137	PPARA	NM_001001928	1.16337	0.464206	0.552491	0.770804	0.683407	0.439131	0.524196	0.338992	0.685936	1.16674	0.608199	0.35322	0.438688	0.264197	0.605218	1.25248	5465	chr22	46546499	46639653	10049	+	protein_coding	MGC2237|MGC2452|NR1C1|PPAR|PPARalpha|hPPAR	P19027	peroxisome proliferator activated receptor alpha	NM_001001928
1138	MTUS1	NM_001001931	1	1	0	0	0	0	0	0	0	0	0	0	0	0	0	0	57509	chr8	17501303	17658426	7565	-	protein_coding	ATBP|ATIP|DKFZp586D1519|DKFZp686F20243|FLJ14295|KIAA1288|MP44|MTSG1	P28037	microtubule associated tumor suppressor 1	NM_001001931
1139	LHX8	NM_001001933	1	1	0	0	0	0	0	0	0	0	0	0	0	0	0	0	431707	chr1	75594119	75627218	2446	+	protein_coding	Lhx7	P3424	LIM homeobox 8	NM_001001933
1140	ATP5A1	NM_001001935	1.2516	0.284699	0.118864	0.442639	0.330406	0.000391795	0	0.000118775	0.771307	0.454563	0.258434	0	0	0	0.703891	0.373253	498	chr18	43664110	43684199	2723	-	protein_coding	ATP5A|ATP5AL2|ATPM|MOM2|OMR|ORM|hATP1	P27977	ATP synthase, H+ transporting, mitochondrial F1 complex, alpha subunit 1, cardiac muscle	NM_001001935
1141	AFAP1L2	NM_001001936	0.907291	0.676277	0.924919	0.784557	0.924764	1.11087	0.711585	0.000599524	1.07425	1.0438	0.901521	1.1544	0.638364	0.000123391	1.10017	1.06926	84632	chr10	116054583	116164537	4339	-	protein_coding	FLJ14564|KIAA1914|XB130	P23788	actin filament associated protein 1 like 2	NM_001001936
1142	ATP5A1	NM_001001937	0.335634	0.373997	1.57822	0.00318284	0.00207144	2.79795	0.00301837	0.00373054	0.00518415	0.000630063	0.00224646	5.93905	0.00232906	0.00222431	0.00234034	0.00222349	498	chr18	43664110	43684199	2723	-	protein_coding	ATP5A|ATP5AL2|ATPM|MOM2|OMR|ORM|hATP1	P27977	ATP synthase, H+ transporting, mitochondrial F1 complex, alpha subunit 1, cardiac muscle	NM_001001937
1143	C9orf47	NM_001001938	1.33396	0.373716	0.00156387	0.417283	0.00131311	0.00189959	0.00147883	0.00164568	0.00189705	1.00272	0.00106191	0.0010918	0.00106943	0.00107305	0.00108015	1.00864	286223	chr9	91605778	91611057	4839	+	protein_coding	C9orf108|FLJ37523|bA791O21.3	P17152	chromosome 9 open reading frame 47	NM_001001938
1144	OR5D18	NM_001001952	1	1	0	0	0	0	0	0	0	0	0	0	0	0	0	0	219438	chr11	55587106	55588047	942	+	protein_coding	OR11-143	P19621	olfactory receptor family 5 subfamily D member 18	NM_001001952
1145	OR10G9	NM_001001953	1	1	0	0	0	0	0	0	0	0	0	0	0	0	0	0	219870	chr11	123893720	123894655	936	+	protein_coding	OR10G10P	P32409	olfactory receptor family 10 subfamily G member 9	NM_001001953
1146	OR5A2	NM_001001954	1	1	0	0	0	0	0	0	0	0	0	0	0	0	0	0	219981	chr11	59189452	59190426	975	-	protein_coding	.	P36014	olfactory receptor family 5 subfamily A member 2	NM_001001954
1147	OR4C13	NM_001001955	1	1	0	0	0	0	0	0	0	0	0	0	0	0	0	0	283092	chr11	49973943	49974971	1029	+	protein_coding	.	P26655	olfactory receptor family 4 subfamily C member 13	NM_001001955
1148	OR13C9	NM_001001956	1	1	0	0	0	0	0	0	0	0	0	0	0	0	0	0	286362	chr9	107379529	107380485	957	-	protein_coding	OR37L|OR9-13	P1550	olfactory receptor family 13 subfamily C member 9	NM_001001956
1149	OR2W3	NM_001001957	1	1	0	0	0	0	0	0	0	0	0	0	0	0	0	0	343171	chr1	248058889	248059833	945	+	protein_coding	OR2W3P|OR2W8P|OST718	P13951	olfactory receptor family 2 subfamily W member 3	NM_001001957
1150	OR7G3	NM_001001958	1	1	0	0	0	0	0	0	0	0	0	0	0	0	0	0	390883	chr19	9236688	9237626	939	-	protein_coding	OST085	P22593	olfactory receptor family 7 subfamily G member 3	NM_001001958
1151	OR11L1	NM_001001959	1	1	0	0	0	0	0	0	0	0	0	0	0	0	0	0	391189	chr1	248004230	248005198	969	-	protein_coding	.	P6537	olfactory receptor family 11 subfamily L member 1	NM_001001959
1152	OR5W2	NM_001001960	1	1	0	0	0	0	0	0	0	0	0	0	0	0	0	0	390148	chr11	55681126	55682058	933	-	protein_coding	OR5W2P|OR5W3P	P13554	olfactory receptor family 5 subfamily W member 2	NM_001001960
1153	OR13C3	NM_001001961	0.970489	0.373888	0.0432291	1.21643e-05	0	2.70783e-05	0.12596	8.20845e-06	2.82842e-05	0	0	0	0.0913521	0	0	0	138803	chr9	107298051	107299094	1044	-	protein_coding	OR37G|OR9-8	P10971	olfactory receptor family 13 subfamily C member 3	NM_001001961
1154	OR2L8	NM_001001963	1	1	0	0	0	0	0	0	0	0	0	0	0	0	0	0	391190	chr1	248112160	248113098	939	+	protein_coding	.	P5094	olfactory receptor family 2 subfamily L member 8 (gene/pseudogene)	NM_001001963
1155	OR2T11	NM_001001964	1	1	0	0	0	0	0	0	0	0	0	0	0	0	0	0	127077	chr1	248789479	248790429	951	-	protein_coding	OR2T11Q	P27147	olfactory receptor family 2 subfamily T member 11 (gene/pseudogene)	NM_001001964
1156	OR4D5	NM_001001965	1	1	0	0	0	0	0	0	0	0	0	0	0	0	0	0	219875	chr11	123810324	123811280	957	+	protein_coding	OR11-276	P5694	olfactory receptor family 4 subfamily D member 5	NM_001001965
1157	OR14A16	NM_001001966	1	1	0	0	0	0	0	0	0	0	0	0	0	0	0	0	284532	chr1	247978102	247979031	930	-	protein_coding	OR5AT1	P24481	olfactory receptor family 14 subfamily A member 16	NM_001001966
1158	OR5D13	NM_001001967	1	1	0	0	0	0	0	0	0	0	0	0	0	0	0	0	390142	chr11	55540914	55541858	945	+	protein_coding	.	P6700	olfactory receptor family 5 subfamily D member 13 (gene/pseudogene)	NM_001001967
1159	OR6S1	NM_001001968	1	1	0	0	0	0	0	0	0	0	0	0	0	0	0	0	341799	chr14	21108855	21109850	996	-	protein_coding	OR14-37|OR6S1Q	P4795	olfactory receptor family 6 subfamily S member 1	NM_001001968
1160	FAM13C	NM_001001971	0.993262	0.373887	0.00975617	2.72963e-06	0.0290668	6.07632e-06	0	1.84195e-06	6.34692e-06	0	0.020487	0	0	0	0	0	220965	chr10	61005889	61122661	3630	-	protein_coding	FAM13C1|MGC33233	P21354	family with sequence similarity 13 member C	NM_001001971
1161	ATP5C1	NM_001001973	0.919516	0.0310802	7.9537	7.83265	7.97663	7.95009	7.93406	7.7678	7.89365	7.83374	251.718	245.083	243.796	216.616	235.588	228.807	509	chr10	7830093	7849762	1146	+	protein_coding	ATP5C|ATP5CL1	P14726	ATP synthase, H+ transporting, mitochondrial F1 complex, gamma polypeptide 1	NM_001001973
1162	PLEKHA1	NM_001001974	1.45781	0.254332	1.4119	1.9557	1.69552	0.417926	1.76879	1.6661	2.36109	1.7338	2.24671	0.331174	2.41002	2.17011	4.12043	2.34357	59338	chr10	124134094	124191871	4215	+	protein_coding	TAPP1	P28762	pleckstrin homology domain containing A1	NM_001001974
1163	ATP5D	NM_001001975	0.826245	0.0998379	7.51426	7.2389	7.66571	7.53591	7.32028	7.07755	7.30667	7.31985	202.718	183.676	158.971	133.866	156.504	159.94	513	chr19	1241749	1244824	700	+	protein_coding	.	P36005	ATP synthase, H+ transporting, mitochondrial F1 complex, delta subunit	NM_001001975
1164	ATE1	NM_001001976	1.02416	0.921097	1.51637	1.55081	1.1667	1.25196	1.98386	1.19059	1.81536	1.57895	1.25026	1.37338	2.95794	1.28004	2.50752	2.00246	11101	chr10	123499936	123688316	5514	-	protein_coding	MGC26724	.	arginyltransferase 1	NM_001001976
1165	PAMR1	NM_001001991	0.999996	0.357998	9.16466e-06	3.03095e-06	1.75344e-05	9.95948e-06	0	2.30751e-09	7.95112e-09	9.08258e-06	1.23846e-05	6.69741e-06	0	0	0	6.5787e-06	25891	chr11	35453376	35551848	3697	-	protein_coding	DKFZP586H2123|RAMP	P3383	peptidase domain containing associated with muscle regeneration 1	NM_001001991
1166	USP16	NM_001001992	0.931736	0.690635	2.99924	2.89723	3.13659	2.74986	3.08175	2.82427	2.52405	3.25026	7.81928	5.69614	7.47339	6.07298	4.72354	8.57354	10600	chr21	30396938	30426807	3221	+	protein_coding	UBP-M	P11017	ubiquitin specific peptidase 16	NM_001001992
1167	GPM6B	NM_001001994	1.03414	0.848544	0.496695	0.545122	0.482448	0.0965526	0.820979	0.425321	0.409063	0.771241	0.398754	0.0681306	0.767281	0.342187	0.32552	0.711678	2824	chrX	13789062	13956831	4073	-	protein_coding	M6B|MGC17150|MGC54284	P31372	glycoprotein M6B	NM_001001994
1168	GPM6B	NM_001001995	0.855231	0.00745191	0.675254	0.449639	0.65031	0.715515	0.659065	0.375791	0.522667	0.446718	0.571558	0.638821	0.579658	0.29689	0.433844	0.366524	2824	chrX	13789062	13956831	4073	-	protein_coding	M6B|MGC17150|MGC54284	P31372	glycoprotein M6B	NM_001001995
1169	GPM6B	NM_001001996	1	1	0	0	0	0	0	0	0	0	0	0	0	0	0	0	2824	chrX	13789062	13956831	4073	-	protein_coding	M6B|MGC17150|MGC54284	P31372	glycoprotein M6B	NM_001001996
1170	EXOSC10	NM_001001998	0.946402	0.343288	4.65884	4.57937	4.53681	4.72023	4.71215	4.55024	4.66375	4.52011	22.2873	25.2358	25.2358	22.3952	24.2222	22.1096	5394	chr1	11126670	11159967	2842	-	protein_coding	PM-Scl|PM/Scl-100|PMSCL|PMSCL2|RRP6|Rrp6p|p2|p3|p4	P24348	exosome component 10	NM_001001998
1171	RPLP0	NM_001002	0.878391	0.26758	10.4815	10.2944	10.6992	10.468	10.2408	10.2872	10.3634	10.2295	1667.08	1408.44	1210.2	1246.68	1309.53	1208.4	6175	chr12	120634503	120639014	1204	-	protein_coding	L10E|MGC111226|MGC88175|P0|PRLP0|RPP0	P20962	ribosomal protein lateral stalk subunit P0	NM_001002
1172	GMPR2	NM_001002000	0.949748	0.734586	2.66625	2.59186	2.27155	2.95032	2.69725	2.53125	2.52893	2.708	3.84307	6.69871	5.49088	4.77322	4.7456	5.57441	51292	chr14	24701628	24708447	2259	+	protein_coding	MGC15084|MGC830	P3360	guanosine monophosphate reductase 2	NM_001002000
1173	GMPR2	NM_001002001	0.888384	0.246009	3.36317	3.19243	3.35719	3.30423	3.42553	3.04593	3.07233	3.42685	9.27784	8.8342	9.75362	7.2471	7.37047	9.82396	51292	chr14	24701628	24708447	2259	+	protein_coding	MGC15084|MGC830	P3360	guanosine monophosphate reductase 2	NM_001002001
1174	GMPR2	NM_001002002	1.0464	0.502096	4.00644	4.07187	4.16667	3.94708	3.89059	4.12568	4.03762	4.05074	17.0147	14.3508	13.8453	16.4321	15.3429	15.6875	51292	chr14	24701628	24708447	2259	+	protein_coding	MGC15084|MGC830	P3360	guanosine monophosphate reductase 2	NM_001002002
1175	NT5C1B	NM_001002006	1	1	0	0	0	0	0	0	0	0	0	0	0	0	0	0	93034	chr2	18744137	18770846	3194	-	protein_coding	AIRP|CN-IB|CN1B|MGC26640	P16411	5'-nucleotidase, cytosolic IB	NM_001002006
1176	NT5C3A	NM_001002009	0.993576	0.979177	2.14842	2.13913	1.87093	2.38566	2.14299	1.53554	2.60275	2.08456	2.66781	4.2063	3.42012	1.89516	5.05164	3.26643	51251	chr7	33053725	33102409	2140	-	protein_coding	.	P13449	5'-nucleotidase, cytosolic IIIA	NM_001002009
1177	NT5C3A	NM_001002010	0.944137	0.52141	4.37396	4.29102	4.28128	4.36897	4.46571	4.49041	4.15538	4.2041	18.5065	19.5662	21.1159	21.4461	16.7295	17.5633	51251	chr7	33053725	33102409	2140	-	protein_coding	.	P13449	5'-nucleotidase, cytosolic IIIA	NM_001002010
1178	HCFC1R1	NM_001002017	1.31518	0.698677	0.836147	1.23141	0.999043	0.672933	0.817905	0.000547535	0.00188606	2.33405	1.00238	0.590079	0.763778	0	0	4.0605	54985	chr16	3072621	3074287	868	-	protein_coding	FLJ20568|HPIP|MGC70711|MGC99622	P21527	host cell factor C1 regulator 1	NM_001002017
1179	HCFC1R1	NM_001002018	1.13647	0.614799	3.91195	4.09651	4.28268	3.05028	4.12194	3.89184	4.03547	4.32757	18.5216	7.23791	16.4267	13.823	15.319	19.2105	54985	chr16	3072621	3074287	868	-	protein_coding	FLJ20568|HPIP|MGC70711|MGC99622	P21527	host cell factor C1 regulator 1	NM_001002018
1180	PUS1	NM_001002019	0.833673	0.469715	2.2135	1.95105	2.01545	2.50069	2.07427	1.17328	2.30274	2.14094	3.05374	4.63925	3.21451	1.2522	3.91475	3.4357	80324	chr12	132413745	132428406	2347	+	protein_coding	MGC11268	P29717	pseudouridylate synthase 1	NM_001002019
1181	PUS1	NM_001002020	1.15191	0.65828	2.84637	3.05041	3.16908	3.07733	2.04977	2.31562	3.20837	3.41035	8.02003	7.40473	3.1446	3.97072	8.20316	9.69516	80324	chr12	132413745	132428406	2347	+	protein_coding	MGC11268	P29717	pseudouridylate synthase 1	NM_001002020
1182	PFKL	NM_001002021	0.908456	0.493456	1.208	1.06949	1.00297	1.15416	1.43341	1.28837	0.832334	1.05171	1.00803	1.21913	1.70235	1.4404	0.775244	1.08192	5211	chr21	45719917	45747264	3412	+	protein_coding	DKFZp686G1648|DKFZp686L2097|FLJ30173|FLJ40909|PFK-B	P6677	phosphofructokinase, liver type	NM_001002021
1183	CLDN18	NM_001002026	1	1	0	0	0	0	0	0	0	0	0	0	0	0	0	0	51208	chr3	137717658	137752494	3632	+	protein_coding	DKFZp564B2062|SFTA5|SFTPJ	P12866	claudin 18	NM_001002026
1184	ATP5G1	NM_001002027	0.794063	0.0505479	6.73742	6.40474	6.89718	6.55414	6.74059	6.30178	6.41745	6.48886	118.581	92.5113	106.036	77.7719	84.0362	89.4703	516	chr17	46970148	46973232	576	+	protein_coding	ATP5A|ATP5G	P3937	ATP synthase, H+ transporting, mitochondrial Fo complex subunit C1 (subunit 9)	NM_001002027
1185	C4B	NM_001002029_1	1	1	0	0	0	0	0	0	0	0	0	0	0	0	0	0	721	chr6	31949834	32003195	5543	+	protein_coding	C4B1|C4B12|C4B2|C4B3|C4B5|C4F|CH|CO4|CPAMD3|FLJ60561|MGC164979	P25180	complement component 4B (Chido blood group)	NM_001002029_1
1186	C4B	NM_001002029_2	1	1	0	0	0	0	0	0	0	0	0	0	0	0	0	0	721	chr6	31949834	32003195	5543	+	protein_coding	C4B1|C4B12|C4B2|C4B3|C4B5|C4F|CH|CO4|CPAMD3|FLJ60561|MGC164979	P25180	complement component 4B (Chido blood group)	NM_001002029_2
1187	C4B	NM_001002029_3	1	1	0	0	0	0	0	0	0	0	0	0	0	0	0	0	721	chr6	31949834	32003195	5543	+	protein_coding	C4B1|C4B12|C4B2|C4B3|C4B5|C4F|CH|CO4|CPAMD3|FLJ60561|MGC164979	P25180	complement component 4B (Chido blood group)	NM_001002029_3
1188	C4B	NM_001002029_6	0.975302	0.0305513	0.0591426	0.023064	0.0787823	0.05696	0.0414416	0.0245664	0.0219073	0.0227171	0.0564334	0.0399055	0.0291993	0.0171104	0.0150977	0.0161682	721	chr6	31949834	32003195	5543	+	protein_coding	C4B1|C4B12|C4B2|C4B3|C4B5|C4F|CH|CO4|CPAMD3|FLJ60561|MGC164979	P25180	complement component 4B (Chido blood group)	NM_001002029_6
1189	C4B	NM_001002029_7	1	1	0	0	0	0	0	0	0	0	0	0	0	0	0	0	721	chr6	31949834	32003195	5543	+	protein_coding	C4B1|C4B12|C4B2|C4B3|C4B5|C4F|CH|CO4|CPAMD3|FLJ60561|MGC164979	P25180	complement component 4B (Chido blood group)	NM_001002029_7
1190	ECHDC1	NM_001002030	0.494385	0.327521	1.65965	0.643356	1.54602	0.00545333	2.4736	0.000688483	0.00237138	1.42425	1.92591	0.00217438	4.55711	0	0	1.69569	55862	chr6	127609857	127664754	2391	-	protein_coding	DKFZp762M1110|FLJ40827|dJ351K20.2	P8654	ethylmalonyl-CoA decarboxylase 1	NM_001002030
1191	ATP5G2	NM_001002031	1.18635	0.291747	0.19394	0.44047	0	0.517679	0	0.640295	0.327144	0.331088	0	0.42948	0	0.557887	0.252833	0.260397	517	chr12	54058944	54070512	1437	-	protein_coding	.	P19469	ATP synthase, H+ transporting, mitochondrial Fo complex subunit C2 (subunit 9)	NM_001002031
1192	HN1	NM_001002032	0.87649	0.435515	0.3106	0.120409	0.254218	0.000289737	0.611437	8.7834e-05	0.000302639	0.334407	0.193533	0	0.528215	0	0	0.263073	51155	chr17	73131338	73150778	3277	-	protein_coding	ARM2|HN1A	P10517	hematological and neurological expressed 1	NM_001002032
1193	HN1	NM_001002033	1.09303	0.798085	0.743221	0.871559	1.03202	0.254092	0.835327	1.50747	0.277337	0.519889	1.0482	0.190424	0.785085	1.84106	0.209605	0.43851	51155	chr17	73131338	73150778	3277	-	protein_coding	ARM2|HN1A	P10517	hematological and neurological expressed 1	NM_001002033
1194	FAM109B	NM_001002034	1.04162	0.276055	0.183879	0.242713	0.221245	0.135776	0.193305	0.171774	0.2465	0.306703	0.16651	0.0978248	0.143586	0.126144	0.18505	0.238962	150368	chr22	42470255	42475442	2332	+	protein_coding	DKFZp686J07229|MGC125831|MGC125832|Ses2	P20372	family with sequence similarity 109 member B	NM_001002034
1195	DEFB108B	NM_001002035	1	1	0	0	0	0	0	0	0	0	0	0	0	0	0	0	245911	chr11	71544246	71548608	222	+	protein_coding	.	P26669	defensin beta 108B	NM_001002035
1196	ASTL	NM_001002036	0.911857	0.519166	0.469995	0.336875	0.462771	0.711126	0.189091	0.410362	0.101623	0.472024	0.379644	0.6342	0.140298	0.32841	0.0719792	0.390316	431705	chr2	96789589	96804175	1296	-	protein_coding	MGC129843	P32703	astacin-like metallo-endopeptidase (M12 family)	NM_001002036
1197	KLK2	NM_001002231	1	1	0	0	0	0	0	0	0	0	0	0	0	0	0	0	3817	chr19	51376689	51383823	2996	+	protein_coding	KLK2A2|MGC12201|hK2	P24120	kallikrein related peptidase 2	NM_001002231
1198	SERPINA1	NM_001002235	1.31274	0.25868	1.59197	1.98455	1.81615	1.75502	1.10241	1.51131	2.09813	2.24488	2.53001	2.36295	1.14879	1.8474	3.26604	3.76386	5265	chr14	94843084	94857029	3975	-	protein_coding	A1A|A1AT|AAT|MGC23330|MGC9222|PI|PI1|PRO2275|alpha1AT	P31576	serpin family A member 1	NM_001002235
1199	SERPINA1	NM_001002236	1.5406	0.154379	0.0510988	0.674592	0.00343319	0.145063	0	0.000167847	1.05925	0.769329	0.00266817	0.104658	0	0	1.07979	0.708985	5265	chr14	94843084	94857029	3975	-	protein_coding	A1A|A1AT|AAT|MGC23330|MGC9222|PI|PI1|PRO2275|alpha1AT	P31576	serpin family A member 1	NM_001002236
1200	AFTPH	NM_001002243	1.08536	0.699439	1.89298	2.01115	1.57746	1.99866	2.05705	2.30282	1.44541	2.1491	1.99248	2.98135	3.16435	3.92891	1.71183	3.45957	54812	chr2	64751439	64820138	5240	+	protein_coding	FLJ20080|FLJ23793|MGC33965|Nbla10388	P8758	aftiphilin	NM_001002243
1201	ANAPC11	NM_001002244	0.885374	0.0715077	0.813294	0.637653	0.766949	0.844385	0.827405	0.489407	0.730795	0.681645	0.704222	0.791448	0.775269	0.403001	0.655723	0.609188	51529	chr17	79848666	79858409	1330	+	protein_coding	APC11|Apc11p|MGC882	P28939	anaphase promoting complex subunit 11	NM_001002244
1202	ANAPC11	NM_001002245	0.748371	0.233584	4.32003	3.90185	4.24608	4.53092	4.15605	3.91969	3.21811	4.35076	18.0343	22.0161	16.8439	14.1115	8.25241	19.5409	51529	chr17	79848666	79858409	1330	+	protein_coding	APC11|Apc11p|MGC882	P28939	anaphase promoting complex subunit 11	NM_001002245
1203	ANAPC11	NM_001002246	1.02673	0.818372	4.02245	4.06051	4.17165	3.81364	4.0592	3.80902	4.15948	4.18348	17.0769	12.9931	15.6853	12.9956	16.7849	17.2931	51529	chr17	79848666	79858409	1330	+	protein_coding	APC11|Apc11p|MGC882	P28939	anaphase promoting complex subunit 11	NM_001002246
1204	ANAPC11	NM_001002247	0.91695	0.660656	3.93129	3.80621	4.17324	3.57826	3.98018	4.16866	3.60208	3.56549	17.0949	10.8863	14.7957	16.9602	11.0818	10.9252	51529	chr17	79848666	79858409	1330	+	protein_coding	APC11|Apc11p|MGC882	P28939	anaphase promoting complex subunit 11	NM_001002247
1205	ANAPC11	NM_001002248	0.812738	0.424609	4.30782	4.00869	4.52659	4.27258	4.09089	3.21173	4.05883	4.4828	22.1172	18.2385	16.0562	8.24906	15.5831	21.5078	51529	chr17	79848666	79858409	1330	+	protein_coding	APC11|Apc11p|MGC882	P28939	anaphase promoting complex subunit 11	NM_001002248
1206	ANAPC11	NM_001002249	0.913325	0.508037	2.64537	2.51457	2.93651	2.50656	2.44134	2.38457	2.59717	2.55335	6.67571	4.65855	4.43599	4.215	5.02466	4.90669	51529	chr17	79848666	79858409	1330	+	protein_coding	APC11|Apc11p|MGC882	P28939	anaphase promoting complex subunit 11	NM_001002249
1207	ARL6IP4	NM_001002251	0.950079	0.785345	4.58604	4.51216	4.45333	4.9616	4.24698	4.72828	4.35473	4.42563	20.978	30.0198	18.0058	25.4694	19.3558	20.645	51329	chr12	123464607	123467460	1668	+	protein_coding	MGC814|SFRS20|SR-25|SRp25|SRrp37	P19408	ADP ribosylation factor like GTPase 6 interacting protein 4	NM_001002251
1208	ARL6IP4	NM_001002252	0.938194	0.595567	2.93043	2.83839	2.71832	2.8365	3.19317	2.79966	2.77456	2.93569	5.60088	6.11173	8.15343	5.95347	5.81113	6.69996	51329	chr12	123464607	123467460	1668	+	protein_coding	MGC814|SFRS20|SR-25|SRp25|SRrp37	P19408	ADP ribosylation factor like GTPase 6 interacting protein 4	NM_001002252
1209	AWAT2	NM_001002254	1	1	0	0	0	0	0	0	0	0	0	0	0	0	0	0	158835	chrX	69260392	69269788	2124	-	protein_coding	DC4|DGAT2L4|MFAT|WS	P14290	acyl-CoA wax alcohol acyltransferase 2	NM_001002254
1210	SUMO4	NM_001002255	1.18566	0.0508627	0.250305	0.495997	0.166786	0.363573	0.213146	0.45737	0.406234	0.616007	0.12335	0.284787	0.159475	0.3724	0.323186	0.53643	387082	chr6	149721495	149722182	688	+	protein_coding	IDDM5|SMT3H4|SUMO-4|dJ281H8.4	P31113	small ubiquitin-like modifier 4	NM_001002255
1211	LCLAT1	NM_001002257	1.07913	0.478761	3.11334	3.22321	3.03135	3.15328	3.15203	3.1567	3.45486	3.02375	7.20084	7.85725	7.89674	7.90586	9.91716	7.18801	253558	chr2	30670092	30867091	5461	+	protein_coding	1AGPAT8|AGPAT8|ALCAT1|FLJ37965|HSRG1849|LYCAT|UNQ1849	P10423	lysocardiolipin acyltransferase 1	NM_001002257
1212	ATP5G3	NM_001002258	0.973477	0.828387	0.836433	0.797652	0.613316	0.888308	0.982666	0.545846	0.812913	0.998684	0.532112	0.846571	0.977044	0.458894	0.752403	1.00537	518	chr2	176040986	176046490	2639	-	protein_coding	MGC125738|P3	P31906	ATP synthase, H+ transporting, mitochondrial Fo complex subunit C3 (subunit 9)	NM_001002258
1213	CAPRIN2	NM_001002259	1.34599	0.0250465	0.0576407	0.486306	0	0.000388766	0.166095	0.665499	0.349187	0.42503	6.94022e-05	0	0.122224	0.585356	0.272135	0.345357	65981	chr12	30862486	30907448	4422	-	protein_coding	C1QDC1|EEG-1|EEG1|FLJ11391|FLJ22569|KIAA1873|MGC102894|MGC134847|MGC134848|RNG140|caprin-2	P17102	caprin family member 2	NM_001002259
1214	ZFYVE27	NM_001002261	1.10777	0.8188	0.445907	0.593561	0.999882	0.000757735	0.119219	0.00322291	1.33609	0	1.00255	0	0.0863782	0.00206699	1.51929	0	118813	chr10	99496878	99520664	3107	+	protein_coding	PROTRUDIN|RP11-459F3.2|SPG33	P20838	zinc finger FYVE-type containing 27	NM_001002261
1215	ZFYVE27	NM_001002262	1.14221	0.501772	2.09863	2.29046	2.10335	2.12862	2.06318	2.63979	1.7619	2.337	3.30868	3.35551	3.18235	5.22556	2.37635	4.08147	118813	chr10	99496878	99520664	3107	+	protein_coding	PROTRUDIN|RP11-459F3.2|SPG33	P20838	zinc finger FYVE-type containing 27	NM_001002262
1216	EPSTI1	NM_001002264	0.991599	0.373888	0.0121754	3.3929e-06	0	7.5528e-06	0.0362148	2.28953e-06	7.88916e-06	0	0	0	0.0254662	0	0	0	94240	chr13	43460524	43566407	3201	-	protein_coding	BRESI1|MGC29634	P14006	epithelial stromal interaction 1 (breast)	NM_001002264
1217	MARCH8	NM_001002266	0.973129	0.372328	0.0393309	3.3208e-05	0	0.000358074	0.114584	2.71448e-05	7.24781e-05	0	0	0.000226425	0.0827733	1.35287e-05	3.15562e-05	8.36692e-06	220972	chr10	45950033	46090354	6310	-	protein_coding	MARCH-VIII|MIR|RNF178|c-MIR	P14617	membrane associated ring-CH-type finger 8	NM_001002266
1218	EXOSC3	NM_001002269	0.914198	0.747275	0.980698	0.851277	1.19469	0.57348	1.09976	1.28672	0.980067	0	1.29291	0.484558	1.14427	1.43784	0.967293	0	51010	chr9	37779711	37785089	1841	-	protein_coding	MGC15120|MGC723|RP11-3J10.8|RRP40|Rrp40p|bA3J10.7|hRrp-40|hRrp40p|p10	P35236	exosome component 3	NM_001002269
1219	FCGR2B	NM_001002273	0.988991	0.656045	0.0421709	0.0262003	0	0.059831	0.0657686	0.0771732	4.44129e-05	0	0	0.0419723	0.0467197	0.0548148	0	0	2213	chr1	161632905	161648444	2416	+	protein_coding	CD32|CD32B|FCG2|FCGR2|IGFR2	P23002	Fc fragment of IgG receptor IIb	NM_001002273
1220	FCGR2B	NM_001002274	0.991905	0.647317	0.0302822	0.0185554	0	0.0434795	0.046895	0.0549348	3.16137e-05	0	0	0.0303072	0.0330987	0.0387088	0	0	2213	chr1	161632905	161648444	2416	+	protein_coding	CD32|CD32B|FCG2|FCGR2|IGFR2	P23002	Fc fragment of IgG receptor IIb	NM_001002274
1221	FCGR2B	NM_001002275	0.999971	0.50181	8.12797e-05	3.91181e-05	0	0.000138407	0.000105428	0.000117274	7.67982e-08	0	0	9.37214e-05	7.34219e-05	8.07085e-05	0	0	2213	chr1	161632905	161648444	2416	+	protein_coding	CD32|CD32B|FCG2|FCGR2|IGFR2	P23002	Fc fragment of IgG receptor IIb	NM_001002275
1222	WLS	NM_001002292	0.751103	0.132277	0.560064	0.147146	0.205821	0.672576	0.744803	0.000154385	0.402748	0	0.154221	0.591224	0.67631	0	0.320017	0	79971	chr1	68564142	68698229	3030	-	protein_coding	C1orf139|DKFZp686I0788|EVI|FLJ23091|GPR177|MGC131760|MGC14878|MRP	P182	wntless Wnt ligand secretion mediator	NM_001002292
1223	FMO3	NM_001002294	0.99796	0.373887	0.00294681	8.24176e-07	0.00882062	1.83467e-06	0	5.56154e-07	1.91637e-06	0	0.00618505	0	0	0	0	0	2328	chr1	171060018	171086959	2070	+	protein_coding	FMOII|MGC34400|TMAU|dJ127D3.1	P25478	flavin containing monooxygenase 3	NM_001002294
1224	GATA3	NM_001002295	1.05669	0.370895	8.20455	8.28411	8.22475	8.1977	8.19098	8.27744	8.41338	8.14942	299.147	291.154	291.515	308.821	338.197	285.019	2625	chr10	8096667	8117164	3213	+	protein_coding	HDR|MGC2346|MGC5199|MGC5445	P34130	GATA binding protein 3	NM_001002295
1225	GOLGA7	NM_001002296	0.747369	0.315835	1.17166	0.751554	1.19396	1.46635	0.77155	1.23782	0.00171647	0.758048	1.29189	1.756	0.707966	1.35653	0	0.69772	51125	chr8	41348081	41368499	2284	+	protein_coding	GCP16|GOLGA3AP1|GOLGA7A|HSPC041|MGC21096|MGC4876	P21557	golgin A7	NM_001002296
1226	NFU1	NM_001002755	0.796642	0.0399317	4.41537	4.08737	4.42782	4.28732	4.5214	3.97507	4.01742	4.25372	20.5896	18.4347	21.9858	14.7025	15.1119	18.2101	27247	chr2	69623245	69664760	1462	-	protein_coding	HIRIP5|MGC142252|MGC142254|NIFUC|Nfu|NifU	P26909	NFU1 iron-sulfur cluster scaffold	NM_001002755
1227	NFU1	NM_001002756	1.56566	0.228587	0.000165187	0.646935	0	0.000495506	0	1.2231	0.446825	0	0	0	0	1.33318	0.360912	0	27247	chr2	69623245	69664760	1462	-	protein_coding	HIRIP5|MGC142252|MGC142254|NIFUC|Nfu|NifU	P26909	NFU1 iron-sulfur cluster scaffold	NM_001002756
1228	PRY2	NM_001002758_1	1	1	0	0	0	0	0	0	0	0	0	0	0	0	0	0	442862	chrY	24217903	24242154	1238	-	protein_coding	PRY|PRYP3|PRYP4|PTPN13LY|PTPN13LY2	P8206	PTPN13-like, Y-linked 2	NM_001002758_1
1229	SFR1	NM_001002759	0.937823	0.898619	2.24559	2.15298	2.16749	3.06922	0.423639	2.13637	1.66668	2.52881	3.50444	7.36504	0.342537	3.39122	2.16047	4.80288	119392	chr10	105881816	105886143	1529	+	protein_coding	.	P24002	SWI5 dependent homologous recombination repair protein 1	NM_001002759
1230	BPY2B	NM_001002760	1	1	0	0	0	0	0	0	0	0	0	0	0	0	0	0	442867	chrY	25130410	27198251	1235	+	protein_coding	BPY2|BPY2C|VCY2|VCY2B	P29549	basic charge, Y-linked, 2B	NM_001002760
1231	BPY2B	NM_001002760_1	1	1	0	0	0	0	0	0	0	0	0	0	0	0	0	0	442867	chrY	25130410	27198251	1235	+	protein_coding	BPY2|BPY2C|VCY2|VCY2B	P29549	basic charge, Y-linked, 2B	NM_001002760_1
1232	BPY2B	NM_001002760_2	1	1	0	0	0	0	0	0	0	0	0	0	0	0	0	0	442867	chrY	25130410	27198251	1235	+	protein_coding	BPY2|BPY2C|VCY2|VCY2B	P29549	basic charge, Y-linked, 2B	NM_001002760_2
1233	DNAJB12	NM_001002762	1.011	0.941596	1.91247	1.92826	1.98289	2.10496	1.60354	1.64368	1.95483	2.14291	2.96271	3.28628	2.04121	2.12091	2.86166	3.44021	54788	chr10	74092588	74114907	3198	-	protein_coding	DJ10|DKFZp586B2023	P14748	DnaJ heat shock protein family (Hsp40) member B12	NM_001002762
1234	MCTP1	NM_001002796	1.00001	0.538154	2.26447e-05	4.38376e-05	0	6.79331e-05	0	1.23749e-08	6.46832e-05	6.68161e-05	0	4.59136e-05	0	0	4.36603e-05	4.80417e-05	79772	chr5	94041242	94620279	5400	-	protein_coding	FLJ22344	P13925	multiple C2 and transmembrane domain containing 1	NM_001002796
1235	SMC4	NM_001002800	1.00388	0.977671	4.76225	4.76784	4.42617	4.9661	4.84091	4.77891	4.5655	4.93539	20.5709	30.1117	27.6852	26.4137	22.5574	29.8112	10051	chr3	160117092	160152741	5973	+	protein_coding	CAPC|SMC4L1|hCAP-C	P24048	structural maintenance of chromosomes 4	NM_001002800
1236	PDE4DIP	NM_001002810	1	1	0	0	0	0	0	0	0	0	0	0	0	0	0	0	9659	chr1	144851424	145076186	13449	-	protein_coding	CMYA2|DKFZp781J054|MGC75440|MMGL	P35020	phosphodiesterase 4D interacting protein	NM_001002810
1237	PDE4DIP	NM_001002811	0.855751	0.0140913	4.2962	4.07146	4.35038	4.33585	4.19748	4.04802	4.10328	4.06251	19.4611	19.1016	17.3638	15.5175	16.1022	15.8275	9659	chr1	144851424	145076186	13449	-	protein_coding	CMYA2|DKFZp781J054|MGC75440|MMGL	P35020	phosphodiesterase 4D interacting protein	NM_001002811
1238	PDE4DIP	NM_001002812	1	1	0	0	0	0	0	0	0	0	0	0	0	0	0	0	9659	chr1	144851424	145076186	13449	-	protein_coding	CMYA2|DKFZp781J054|MGC75440|MMGL	P35020	phosphodiesterase 4D interacting protein	NM_001002812
1239	RAB11FIP1	NM_001002814	1.29377	0.0165775	3.1887	3.56028	3.02527	3.15386	3.36624	3.6046	3.50878	3.56584	7.16784	7.85851	9.32096	11.1485	10.3305	10.9188	80223	chr8	37716465	37757015	7856	-	protein_coding	DKFZp686E2214|FLJ22524|FLJ22622|MGC78448|NOEL1A|RCP|rab11-FIP1	P22649	RAB11 family interacting protein 1	NM_001002814
1240	ZNF787	NM_001002836	0.917186	0.232644	5.08843	4.96372	5.23137	5.0718	4.9481	4.96091	5.00407	4.92509	36.6849	32.4725	29.8985	30.0989	30.9294	29.6005	126208	chr19	56598729	56632742	2024	-	protein_coding	TIP20	P9441	zinc finger protein 787	NM_001002836
1241	INPP5J	NM_001002837	0.836459	0.279175	0.257712	7.79929e-05	0.589407	0.000173612	0.113693	5.26295e-05	0.000181343	0	0.505984	0	0.0821284	0	0	3.96359e-05	27124	chr22	31518909	31530683	2783	+	protein_coding	INPP5|MGC129984|PIB5PA|PIPP	P14713	inositol polyphosphate-5-phosphatase J	NM_001002837
1242	WNK3	NM_001002838	1.05087	0.0773279	0.100994	0.172581	0.0745862	0.114752	0.113285	0.134457	0.158289	0.223517	0.053422	0.0820946	0.081823	0.0974475	0.11508	0.16914	65267	chrX	54219256	54384438	11434	-	protein_coding	FLJ30437|FLJ42662|KIAA1566|PRKWNK3	P2374	WNK lysine deficient protein kinase 3	NM_001002838
1243	MYL4	NM_001002841	1	1	0	0	0	0	0	0	0	0	0	0	0	0	0	0	4635	chr17	45286428	45301045	1118	+	protein_coding	ALC1|AMLC|GT1	P4988	myosin light chain 4	NM_001002841
1244	ZNF280D	NM_001002843	1.08882	0.559529	0.19567	0.318433	0.521581	0.000345736	0	0.318489	0.447479	0.176636	0.436919	0	0	0.246569	0.361708	0.131821	54816	chr15	56922374	57026284	8287	-	protein_coding	MGC21637|MGC61687|SUHW4|ZNF634	P10718	zinc finger protein 280D	NM_001002843
1245	ZNF280D	NM_001002844	0.934667	0.63867	0.324877	0.227401	0.00261884	0.557458	0.360851	0.297463	0.00232885	0.357919	0.00201196	0.469477	0.284505	0.228537	0.00132208	0.284023	54816	chr15	56922374	57026284	8287	-	protein_coding	MGC21637|MGC61687|SUHW4|ZNF634	P10718	zinc finger protein 280D	NM_001002844
1246	ANXA2	NM_001002857	0.797072	0.132537	5.10386	4.77664	5.21026	5.1322	4.95766	4.39174	4.88762	4.98355	36.1364	33.9066	30.1035	19.9588	28.4529	30.8618	302	chr15	60639350	60690185	1856	-	protein_coding	ANX2|ANX2L4|CAL1H|LIP2|LPC2|LPC2D|P36|PAP-IV	P22056	annexin A2	NM_001002857
1247	ANXA2	NM_001002858	0.688902	0.296588	1.37719	0.839563	1.02046	0.888308	1.96839	0.600883	0.938612	0.952479	1.0325	0.845705	2.91534	0.515382	0.910936	0.943482	302	chr15	60639350	60690185	1856	-	protein_coding	ANX2|ANX2L4|CAL1H|LIP2|LPC2|LPC2D|P36|PAP-IV	P22056	annexin A2	NM_001002858
1248	BTBD7	NM_001002860	0.93163	0.511296	3.43028	3.3281	3.2225	3.4396	3.60359	3.44062	3.38435	3.14227	8.36315	9.80158	11.1662	9.84283	9.39315	7.89102	55727	chr14	93703896	93799438	9581	-	protein_coding	DKFZp686N0544|FUP1|MGC48310	P6705	BTB domain containing 7	NM_001002860
1249	DERL3	NM_001002862	1.07857	0.363648	0.11453	0.223649	0.0569755	0.225066	0.0548519	0.387514	0.110318	0.157621	0.0406174	0.167733	0.0388474	0.307665	0.07872	0.116761	91319	chr22	24176690	24181199	1069	-	protein_coding	C22orf14|IZP6|LLN2|MGC71803|derlin-3	P398	derlin 3	NM_001002862
1250	CENPM	NM_001002876	0.688496	0.360012	0.539998	0.0015174	0.0425852	0.00165907	1.22083	0.000121444	0.00442635	0	0.0303367	0.000857345	1.3316	0	0.002739	0.000411636	79019	chr22	42334725	42343168	1430	-	protein_coding	C22orf18|CENP-M|MGC861|PANE1|bK250D10.2	P33089	centromere protein M	NM_001002876
1251	THOC5	NM_001002877	1.22827	0.355136	2.79547	3.0921	2.84256	2.32914	3.10932	2.66286	3.27528	3.25812	6.1944	4.00035	7.63686	5.32401	8.64053	8.62576	8563	chr22	29904156	29949736	2754	-	protein_coding	C22orf19|Fmip|PK1.3|fSAP79	P33680	THO complex 5	NM_001002877
1252	THOC5	NM_001002878	1.21813	0.409409	1.66651	1.95118	0.898357	2.02914	1.83908	2.17569	1.75429	1.89105	0.868989	3.06722	2.58036	3.5133	2.36063	2.72899	8563	chr22	29904156	29949736	2754	-	protein_coding	C22orf19|Fmip|PK1.3|fSAP79	P33680	THO complex 5	NM_001002878
1253	THOC5	NM_001002879	0.830714	0.569337	1.43215	1.16457	1.7518	1.45315	0.992492	1.5033	1.53112	0	2.37451	1.72965	0.990837	1.83227	1.88092	0	8563	chr22	29904156	29949736	2754	-	protein_coding	C22orf19|Fmip|PK1.3|fSAP79	P33680	THO complex 5	NM_001002879
1254	CBY1	NM_001002880	0.867376	0.563672	2.70185	2.49658	2.98875	2.76532	2.25769	2.77386	2.69348	1.85693	6.95867	5.7714	3.78643	5.83095	5.44091	2.64848	25776	chr22	39052658	39069855	1271	+	protein_coding	C22orf2|CBY|HS508I15A|PGEA1|PIGEA-14|PIGEA14|arb1	P5481	chibby homolog 1 (Drosophila)	NM_001002880
1255	FCRLB	NM_001002901	1.29788	0.473037	0.714187	1.09035	0.824421	0.217509	0.99141	1.39241	1.46603	0	0.773827	0.160529	0.989117	1.62314	1.7553	0	127943	chr1	161691334	161697933	2329	+	protein_coding	FCRL2|FCRLM2|FCRLY|FLJ31052|FREB-2|FcRY|RP11-474I16.6	P26519	Fc receptor like B	NM_001002901
1256	OR8G1	NM_001002905	0.999974	0.373887	3.71442e-05	1.03378e-08	0	2.30125e-08	0.000111407	6.97592e-09	2.40374e-08	0	0	0	7.7576e-05	0	0	0	26494	chr11	124120423	124135756	929	+	protein_coding	HSTPCR25|OR8G1P|TPCR25	P10704	olfactory receptor family 8 subfamily G member 1 (gene/pseudogene)	NM_001002905
1257	XKRY2	NM_001002906_1	1	1	0	0	0	0	0	0	0	0	0	0	0	0	0	0	353515	chrY	19880860	20298915	3162	-	protein_coding	XKRYP7	P20105	XK related, Y-linked 2	NM_001002906_1
1258	OR8K1	NM_001002907	1	1	0	0	0	0	0	0	0	0	0	0	0	0	0	0	390157	chr11	56113515	56114474	960	+	protein_coding	OR11-182|OR8N1P	P35195	olfactory receptor family 8 subfamily K member 1	NM_001002907
1259	GPATCH8	NM_001002909	1.09643	0.485334	2.91133	3.04414	2.63388	3.01229	3.05207	3.05579	3.2299	2.81727	5.22645	7.03353	7.30096	7.30457	8.34138	6.09553	23131	chr17	42472645	42580970	7085	-	protein_coding	GPATC8|KIAA0553	P20488	G-patch domain containing 8	NM_001002909
1260	GPR139	NM_001002911	0.933826	0.425756	0.17056	0.0717861	0.29672	0.000156348	0.19916	4.73959e-05	0.205416	0	0.229184	0	0.148216	0	0.151999	0	124274	chr16	20043043	20085100	1238	-	protein_coding	GPRg1|PGR3	P34815	G protein-coupled receptor 139	NM_001002911
1261	ERICH3	NM_001002912	0.996368	0.373888	0.00525087	1.46047e-06	0	3.25111e-06	0.0156924	9.85528e-07	3.39589e-06	0	0	0	0.0109606	0	0	0	127254	chr1	75033795	75139422	7159	-	protein_coding	.	P28588	glutamate rich 3	NM_001002912
1262	PTRH1	NM_001002913	0.902763	0.219005	4.15171	4.00413	4.30266	4.10747	4.03125	3.8933	4.03033	4.08222	18.7946	16.1574	15.3654	13.8377	15.2597	16.056	138428	chr9	130476227	130477936	815	-	protein_coding	C9orf115|MGC51999|PTH1	P33965	peptidyl-tRNA hydrolase 1 homolog	NM_001002913
1263	KCTD11	NM_001002914	1.13912	0.262683	3.20441	3.39232	3.3738	3.01361	3.20339	3.48664	3.49179	3.17652	9.39695	7.03765	8.21938	10.1947	10.1988	8.10295	147040	chr17	7255208	7258262	3055	+	protein_coding	C17orf36|MGC129844|REN|REN/KCTD11	P30799	potassium channel tetramerization domain containing 11	NM_001002914
1264	IGFL2	NM_001002915	0.999999	0.373887	1.67145e-06	4.72749e-10	5.01329e-06	1.05237e-09	0	3.19011e-10	1.09924e-09	0	3.54757e-06	0	0	0	0	0	147920	chr19	46651039	46664561	955	+	protein_coding	UNQ645|VPRI645	P22213	IGF like family member 2	NM_001002915
1265	H2BFWT	NM_001002916	1	1	0	0	0	0	0	0	0	0	0	0	0	0	0	0	158983	chrX	103265719	103268259	894	-	protein_coding	MGC148130|MGC148131	P12419	H2B histone family member W, testis specific	NM_001002916
1266	OR8D1	NM_001002917	1.01806	0.888688	0.134927	0.16075	0.113285	0.000191935	0.277735	5.81844e-05	0.000200483	0.436616	0.0821614	0	0.212529	0	0	0.355884	283159	chr11	124179736	124180662	927	-	protein_coding	JCG9|OR8D3|OST004|PDJ9J14	P18094	olfactory receptor family 8 subfamily D member 1	NM_001002917
1267	OR8D2	NM_001002918	1.0088	0.850307	0.0383371	0.0509823	0.112033	5.5772e-05	0	1.69066e-05	0.147826	0	0.0811423	0	0	0	0.107164	0	283160	chr11	124189158	124190093	936	-	protein_coding	JCG2	P13519	olfactory receptor family 8 subfamily D member 2 (gene/pseudogene)	NM_001002918
1268	FAM150B	NM_001002919	1.24346	0.0838812	0.0777784	0.392133	0.0692233	0.159659	0	0.609874	0.261743	0.277324	0.0495768	0.116044	0	0.525437	0.197559	0.213965	285016	chr2	279561	288308	1398	-	protein_coding	PRO1097|RGPG542	P21384	family with sequence similarity 150 member B	NM_001002919
1269	POTEA	NM_001002920	0.985964	0.374019	0.0203983	5.64397e-06	0	0.0603495	0	3.80855e-06	1.31233e-05	0	0	0.042368	0	0	0	0	340441	chr8	43147585	43218328	1976	+	protein_coding	A26A1|CT104.3|POTE-8|POTE8	P29330	POTE ankyrin domain family member A	NM_001002920
1270	IGFL4	NM_001002923	0.94133	0.374019	0.0872521	2.47529e-05	0	0.247362	0	1.67032e-05	5.75548e-05	0	0	0.186036	0	0	0	0	444882	chr19	46543006	46544274	573	-	protein_coding	.	P5196	IGF like family member 4	NM_001002923
1271	OR5AP2	NM_001002925	1	1	0	0	0	0	0	0	0	0	0	0	0	0	0	0	338675	chr11	56408965	56409915	951	-	protein_coding	OR9J1	P17729	olfactory receptor family 5 subfamily AP member 2	NM_001002925
1272	TWISTNB	NM_001002926	1.00001	0.999798	2.7386	2.73861	2.66789	2.74753	2.79744	2.766	2.74744	2.70164	5.37348	5.68716	5.95775	5.79348	5.68547	5.54696	221830	chr7	19735085	19748660	3892	-	protein_coding	.	P1676	TWIST neighbor	NM_001002926
1273	RPLP1	NM_001003	0.802914	0.0379461	11.561	11.2443	11.7084	11.4686	11.4938	11.1517	11.2105	11.3625	3356.44	2819.07	2885.62	2270.68	2356.55	2651.29	6176	chr15	69745159	69747884	512	+	protein_coding	FLJ27448|MGC5215|P1|RPP1	P24237	ribosomal protein lateral stalk subunit P1	NM_001003
1274	TPD52L1	NM_001003395	0.9315	0.726271	1.34253	1.24016	1.52687	0.989495	1.4546	1.62928	0.930235	1.06183	1.88748	0.979293	1.74244	2.09078	0.899382	1.09729	7164	chr6	125474875	125584644	1871	+	protein_coding	D53|MGC8556|TPD52L2|hD53	P14925	tumor protein D52-like 1	NM_001003395
1275	TPD52L1	NM_001003396	0.998076	0.9671	5.25562	5.25285	5.22362	5.2144	5.32616	5.14667	5.3177	5.28843	36.4867	35.9477	39.1549	34.372	38.6839	38.3612	7164	chr6	125474875	125584644	1871	+	protein_coding	D53|MGC8556|TPD52L2|hD53	P14925	tumor protein D52-like 1	NM_001003396
1276	TPD52L1	NM_001003397	0.831452	0.0210262	7.22932	6.96302	7.21534	7.2798	7.19135	6.84515	7.09224	6.94086	148.094	153.64	145.294	113.8	134.753	122.762	7164	chr6	125474875	125584644	1871	+	protein_coding	D53|MGC8556|TPD52L2|hD53	P14925	tumor protein D52-like 1	NM_001003397
1277	BICD1	NM_001003398	0.915751	0.523398	2.07802	1.95105	2.0072	1.89503	2.30087	1.6639	2.02981	2.12017	3.03036	2.70482	3.93102	2.16484	3.06727	3.37171	636	chr12	32260185	32531141	3479	+	protein_coding	BICD	P34318	BICD cargo adaptor 1	NM_001003398
1278	CACNA1I	NM_001003406	1.13607	0.164091	1.04607	1.23012	1.13257	0.980801	1.0205	1.04337	1.36611	1.26232	1.19676	0.967863	1.02977	1.05923	1.57005	1.40909	8911	chr22	39966758	40085740	9931	+	protein_coding	Cav3.3|KIAA1120	P20848	calcium voltage-gated channel subunit alpha1 I	NM_001003406
1279	ABLIM1	NM_001003407	0.996708	0.386944	0.0152873	0.01053	0.015151	0.0155083	0.0152026	0.0153858	0.0154791	0.000674751	0.0106443	0.0106762	0.0106186	0.0106821	0.0106501	0.000497694	3983	chr10	116190869	116444414	8303	-	protein_coding	ABLIM|DKFZp781D0148|FLJ14564|KIAA0059|LIMAB1|LIMATIN|MGC1224	P29880	actin binding LIM protein 1	NM_001003407
1280	ABLIM1	NM_001003408	1	1	0	0	0	0	0	0	0	0	0	0	0	0	0	0	3983	chr10	116190869	116444414	8303	-	protein_coding	ABLIM|DKFZp781D0148|FLJ14564|KIAA0059|LIMAB1|LIMATIN|MGC1224	P29880	actin binding LIM protein 1	NM_001003408
1281	OR56A3	NM_001003443	1	1	0	0	0	0	0	0	0	0	0	0	0	0	0	0	390083	chr11	5968577	5969524	948	+	protein_coding	OR56A2P|OR56A3P|OR56A6	P32341	olfactory receptor family 56 subfamily A member 3	NM_001003443
1282	SMAD2	NM_001003652	1.15683	0.515816	1.52106	1.73123	0.717783	1.70352	1.89082	1.66304	1.73606	1.79172	0.648707	2.24574	2.71089	2.16351	2.31933	2.4798	4087	chr18	45359466	45457517	10775	-	protein_coding	JV18|JV18-1|MADH2|MADR2|MGC22139|MGC34440|hMAD-2|hSMAD2	P5566	SMAD family member 2	NM_001003652
1283	C1orf95	NM_001003665	1.40751	0.00938089	1.1502	1.64335	0.889215	1.21035	1.31744	1.63748	1.62374	1.66845	0.856312	1.3063	1.49383	2.10824	2.07152	2.19367	.	chr1	226736501	226796915	7705	+	.	DKFZp761P211	P9562	.	NM_001003665
1284	LDLRAD4	NM_001003674	1.00409	0.817261	0.0137773	0.0196678	0	0.0409433	0	0.0581962	2.15453e-05	0	0	0.0285162	0	0.0410578	0	0	753	chr18	13218729	13652753	11355	+	protein_coding	.	P3788	low density lipoprotein receptor class A domain containing 4	NM_001003674
1285	LDLRAD4	NM_001003675	1.00002	0.512689	1.07825e-05	4.16286e-05	0	3.23473e-05	0	0.000124849	3.33863e-08	0	0	2.18127e-05	0	8.59352e-05	0	0	753	chr18	13218729	13652753	11355	+	protein_coding	.	P3788	low density lipoprotein receptor class A domain containing 4	NM_001003675
1286	C11orf49	NM_001003676	0.736932	0.210689	1.77724	1.33684	1.6293	1.84441	1.84736	1.881	1.03961	0.878899	2.1007	2.57925	2.60071	2.67965	1.04799	0.848795	79096	chr11	46958240	47185931	3057	+	protein_coding	FLJ22210|MGC4707	.	chromosome 11 open reading frame 49	NM_001003676
1287	C11orf49	NM_001003677	1.00548	0.977879	0.420823	0.428714	0.548763	0.000598579	0.634897	0.686621	0.514593	0	0.464483	0	0.553354	0.608644	0.426136	0	79096	chr11	46958240	47185931	3057	+	protein_coding	FLJ22210|MGC4707	.	chromosome 11 open reading frame 49	NM_001003677
1288	C11orf49	NM_001003678	1.38638	0.107593	0.343921	0.815239	0.290432	0.664117	0	0.990829	0.524621	0.889776	0.224317	0.58144	0	0.986051	0.435719	0.858659	79096	chr11	46958240	47185931	3057	+	protein_coding	FLJ22210|MGC4707	.	chromosome 11 open reading frame 49	NM_001003678
1289	LEPR	NM_001003679	1.23403	0.178086	0.228897	0.532279	0.00849822	0.588772	0.00854734	0.582997	0.515127	0.497289	0.00621572	0.50147	0.00603095	0.497206	0.426733	0.414885	3953	chr1	65886335	66103176	6891	+	protein_coding	CD295|OBR	P3628	leptin receptor	NM_001003679
1290	LEPR	NM_001003680	1.40438	0.184624	0.386537	0.876471	5.98531e-05	0.942393	0	0.885941	0.696543	1.0279	0.000509233	0.917528	0	0.846757	0.617087	1.04571	3953	chr1	65886335	66103176	6891	+	protein_coding	CD295|OBR	P3628	leptin receptor	NM_001003680
1291	HMGXB4	NM_001003681	1.06365	0.494458	2.7185	2.80751	2.66665	2.70509	2.78138	2.9773	2.59134	2.82794	5.36813	5.49284	5.88082	6.86535	4.99882	6.14518	10042	chr22	35653445	35691800	4251	+	protein_coding	HMG2L1|HMGBCG|THC211630	.	HMG-box containing 4	NM_001003681
1292	TMEM200B	NM_001003682	1.06944	0.596029	1.03367	1.13053	1.02484	0.846707	1.207	1.09947	0.904118	1.35277	1.03858	0.793399	1.30983	1.14093	0.865949	1.56459	399474	chr1	29445937	29450421	2616	-	protein_coding	MGC102864|MGC90489|TTMB	P4141	transmembrane protein 200B	NM_001003682
1293	PDE1A	NM_001003683	0.999958	0.0386132	7.48192e-05	1.4404e-05	5.99335e-05	0.000102295	6.22285e-05	1.65396e-08	4.31951e-05	0	4.22604e-05	6.92146e-05	4.33487e-05	0	2.91055e-05	0	5136	chr2	183004762	183387572	6221	-	protein_coding	HCAM1|HSPDE1A|MGC26303	P28403	phosphodiesterase 1A	NM_001003683
1294	UQCR10	NM_001003684	0.784777	0.0629962	3.95519	3.60554	4.02297	3.76782	4.05776	3.44715	3.79734	3.54934	15.3053	12.5586	15.6679	9.89053	12.8364	10.7912	29796	chr22	30163358	30166402	916	+	protein_coding	HSPC051|HSPC151|QCR9|UCCR7.2|UCRC	P24882	ubiquinol-cytochrome c reductase, complex III subunit X	NM_001003684
1295	SMAD1	NM_001003688	0.876232	0.620845	0.357674	0.167059	0.00699367	0.0120233	0.872512	0.0329744	0.0013741	0.426779	0.00507179	0.00802048	0.831436	0.0229745	0.000681231	0.346939	4086	chr4	146402951	146480325	3117	+	protein_coding	BSP1|JV4-1|JV41|MADH1|MADR1	P21836	SMAD family member 1	NM_001003688
1296	MAD2L1BP	NM_001003690	1.36848	0.0443908	0.354363	0.806937	0.55093	0.231481	0.258452	0.700793	0.684657	1.01132	0.466917	0.172308	0.196552	0.624405	0.603953	1.02212	9587	chr6	43597279	43608688	1629	+	protein_coding	CMT2|KIAA0110|MGC11282|RP1-261G23.6	P23975	MAD2L1 binding protein	NM_001003690
1297	ZMAT5	NM_001003692	0.926237	0.389009	3.86437	3.75382	3.82845	3.92972	3.83263	3.77862	3.92585	3.52954	13.2502	14.1705	13.2602	12.7046	14.1267	10.6311	55954	chr22	30126945	30162969	1033	-	protein_coding	.	P26555	zinc finger matrin-type 5	NM_001003692
1298	LY6G6F	NM_001003693	1	1	0	0	0	0	0	0	0	0	0	0	0	0	0	0	259215	chr6	31674684	31678372	898	+	protein_coding	C6orf21|G6f|LY6G6D|NG32	P20446	lymphocyte antigen 6 complex, locus G6F	NM_001003693
1299	LY6G6F	NM_001003693_1	0.972375	0.373887	0.0404273	1.14024e-05	0.118011	2.53823e-05	0	7.69433e-06	2.65127e-05	0	0.0856265	0	0	0	0	0	259215	chr6	31674684	31678372	898	+	protein_coding	C6orf21|G6f|LY6G6D|NG32	P20446	lymphocyte antigen 6 complex, locus G6F	NM_001003693_1
1300	LY6G6F	NM_001003693_2	1	1	0	0	0	0	0	0	0	0	0	0	0	0	0	0	259215	chr6	31674684	31678372	898	+	protein_coding	C6orf21|G6f|LY6G6D|NG32	P20446	lymphocyte antigen 6 complex, locus G6F	NM_001003693_2
1301	LY6G6F	NM_001003693_3	1	1	0	0	0	0	0	0	0	0	0	0	0	0	0	0	259215	chr6	31674684	31678372	898	+	protein_coding	C6orf21|G6f|LY6G6D|NG32	P20446	lymphocyte antigen 6 complex, locus G6F	NM_001003693_3
1302	LY6G6F	NM_001003693_4	1	1	0	0	0	0	0	0	0	0	0	0	0	0	0	0	259215	chr6	31674684	31678372	898	+	protein_coding	C6orf21|G6f|LY6G6D|NG32	P20446	lymphocyte antigen 6 complex, locus G6F	NM_001003693_4
1303	LY6G6F	NM_001003693_5	1	1	0	0	0	0	0	0	0	0	0	0	0	0	0	0	259215	chr6	31674684	31678372	898	+	protein_coding	C6orf21|G6f|LY6G6D|NG32	P20446	lymphocyte antigen 6 complex, locus G6F	NM_001003693_5
1304	LY6G6F	NM_001003693_6	1	1	0	0	0	0	0	0	0	0	0	0	0	0	0	0	259215	chr6	31674684	31678372	898	+	protein_coding	C6orf21|G6f|LY6G6D|NG32	P20446	lymphocyte antigen 6 complex, locus G6F	NM_001003693_6
1305	BRPF1	NM_001003694	1.0425	0.712081	2.68788	2.74793	2.86357	2.44815	2.72153	2.70189	2.91956	2.60404	6.29837	4.43275	5.60119	5.49813	6.53391	5.11918	7862	chr3	9773434	9789699	4710	+	protein_coding	BR140	P10890	bromodomain and PHD finger containing 1	NM_001003694
1306	ATP5J	NM_001003696	0.635214	0.14321	2.56369	1.90901	1.96755	2.73801	2.83877	2.29189	1.85303	1.46308	2.92218	5.64706	6.15909	3.89105	2.59632	1.77587	522	chr21	27096791	27107965	3186	-	protein_coding	ATP5|ATP5A|ATPM|CF6|F6	P6156	ATP synthase, H+ transporting, mitochondrial Fo complex subunit F6	NM_001003696
1307	ATP5J	NM_001003697	0.839231	0.175168	6.05864	5.80578	6.14487	5.93036	6.09211	5.53822	6.05578	5.77673	69.9887	59.6878	67.2834	45.3989	65.1885	54.2255	522	chr21	27096791	27107965	3186	-	protein_coding	ATP5|ATP5A|ATPM|CF6|F6	P6156	ATP synthase, H+ transporting, mitochondrial Fo complex subunit F6	NM_001003697
1308	RREB1	NM_001003698	1.40043	0.0514746	2.91299	3.39886	3.04851	2.70581	2.96301	3.45891	3.12058	3.57891	7.29892	5.49252	6.8045	9.98203	7.65667	11.0229	6239	chr6	7107830	7252213	8905	+	protein_coding	FINB|HNT|LZ321|RREB-1|Zep-1	P22494	ras responsive element binding protein 1	NM_001003698
1309	RREB1	NM_001003699	1.06848	0.580286	1.61448	1.71005	1.48096	1.72596	1.62606	1.48514	1.95218	1.65357	1.79811	2.29651	2.08881	1.7964	2.85601	2.16257	6239	chr6	7107830	7252213	8905	+	protein_coding	FINB|HNT|LZ321|RREB-1|Zep-1	P22494	ras responsive element binding protein 1	NM_001003699
1310	RREB1	NM_001003700	0.988618	0.941939	0.167221	0.150706	0	0.000206843	0.452634	6.27038e-05	0.000216055	0.411582	0	0	0.36887	0	0	0.332532	6239	chr6	7107830	7252213	8905	+	protein_coding	FINB|HNT|LZ321|RREB-1|Zep-1	P22494	ras responsive element binding protein 1	NM_001003700
1311	ATP5J	NM_001003701	0.917039	0.645587	0.505562	0.380617	0.890767	0.172587	0.35365	0.216838	0.365829	0.540909	0.856518	0.125788	0.27816	0.161744	0.286598	0.458564	522	chr21	27096791	27107965	3186	-	protein_coding	ATP5|ATP5A|ATPM|CF6|F6	P6156	ATP synthase, H+ transporting, mitochondrial Fo complex subunit F6	NM_001003701
1312	ARHGEF35	NM_001003702	1.07074	0.194341	3.33833	3.43693	3.36548	3.23109	3.41234	3.45762	3.36645	3.4841	9.33784	8.34627	9.65604	9.97136	9.26476	10.2634	445328	chr7	143883176	143892791	2474	-	protein_coding	ARHGEF5L|CTAGE4|FLJ43692	P13142	Rho guanine nucleotide exchange factor 35	NM_001003702
1313	ATP5J	NM_001003703	0.872552	0.0339659	3.80969	3.613	3.71285	3.86683	3.84462	3.57967	3.56831	3.68797	12.1529	13.5241	13.3789	10.939	10.804	11.9766	522	chr21	27096791	27107965	3186	-	protein_coding	ATP5|ATP5A|ATPM|CF6|F6	P6156	ATP synthase, H+ transporting, mitochondrial Fo complex subunit F6	NM_001003703
1314	MTFP1	NM_001003704	0.62284	0.381969	1.97428	1.29121	2.32839	2.51824	0.0520249	1.13404	0.960913	1.6784	4.03316	4.71124	0.0372749	1.19225	0.938914	2.2175	51537	chr22	30821611	30825041	1278	+	protein_coding	MTP18	P21981	mitochondrial fission process 1	NM_001003704
1315	OSBPL8	NM_001003712	1.20437	0.424833	2.95947	3.22774	2.69664	2.89868	3.23186	3.19731	3.60703	2.75418	5.50375	6.42328	8.40263	8.16044	11.134	5.79407	114882	chr12	76745578	76953589	7232	-	protein_coding	DKFZp686A11164|MGC126578|MGC133203|MST120|MSTP120|ORP8|OSBP10	P20563	oxysterol binding protein like 8	NM_001003712
1316	ATP5J2	NM_001003713	0.807355	0.082442	8.16518	7.85646	8.25114	7.96453	8.2607	7.65872	7.97334	7.91815	304.682	247.554	305.995	200.767	249.022	242.656	9551	chr7	99055784	99063824	584	-	protein_coding	ATP5JL	P18309	ATP synthase, H+ transporting, mitochondrial Fo complex subunit F2	NM_001003713
1317	ATP5J2	NM_001003714	0.777988	0.506956	3.98647	3.62429	4.24978	3.92984	3.73195	3.40959	2.45316	4.3849	18.0794	14.1716	12.2992	9.61047	4.44179	20.023	9551	chr7	99055784	99063824	584	-	protein_coding	ATP5JL	P18309	ATP synthase, H+ transporting, mitochondrial Fo complex subunit F2	NM_001003714
1318	RECQL5	NM_001003715	0.896284	0.205686	0.909601	0.751629	0.877407	0.793464	1.04633	0.882514	0.720671	0.641126	0.84006	0.729094	1.06626	0.842234	0.643895	0.564917	9400	chr17	73622925	73663269	4718	-	protein_coding	FLJ90603|RECQ5	P19145	RecQ like helicase 5	NM_001003715
1319	RECQL5	NM_001003716	0.940679	0.769553	1.1278	1.03957	0.701746	1.54643	1.006	0.936103	0.919582	1.23996	0.629461	1.91294	1.00943	0.91173	0.886049	1.37177	9400	chr17	73622925	73663269	4718	-	protein_coding	FLJ90603|RECQ5	P19145	RecQ like helicase 5	NM_001003716
1320	GLE1	NM_001003722	0.899411	0.00773344	5.33509	5.18214	5.36238	5.3063	5.33604	5.22554	5.1318	5.18755	40.2695	38.3797	39.4308	36.3601	33.8824	35.7059	2733	chr9	131266971	131304580	3342	+	protein_coding	GLE1L|LCCS|LCCS1|hGLE1	P18039	GLE1, RNA export mediator	NM_001003722
1321	OR10A3	NM_001003745	1	1	0	0	0	0	0	0	0	0	0	0	0	0	0	0	26496	chr11	7960123	7961067	945	-	protein_coding	HSHTPCRX12|HTPCRX12	P25395	olfactory receptor family 10 subfamily A member 3	NM_001003745
1322	OR8I2	NM_001003750	0.948666	0.373888	0.0760489	2.16862e-05	0.217042	4.82743e-05	0	1.46338e-05	5.04242e-05	0	0.162958	0	0	0	0	0	120586	chr11	55860784	55861716	933	+	protein_coding	OR11-170	P24665	olfactory receptor family 8 subfamily I member 2	NM_001003750
1323	KLHL31	NM_001003760	1.12336	0.0406734	0.250737	0.418556	0.212588	0.235074	0.303006	0.506019	0.347424	0.397643	0.15963	0.17561	0.234019	0.419469	0.270504	0.320117	401265	chr6	53512699	53530506	5743	-	protein_coding	BKLHD6|KBTBD1|KLHL|bA345L23.2	P23078	kelch like family member 31	NM_001003760
1324	ATP5H	NM_001003785	1.21705	0.598693	0.63898	0.922374	0	0.792211	0.956024	0.915167	0.00130364	1.48491	0	0.727705	0.940853	0.884437	0	1.80885	10476	chr17	73034955	73043074	622	-	protein_coding	ATPQ	P4132	ATP synthase, H+ transporting, mitochondrial Fo complex subunit D	NM_001003785
1325	STRADA	NM_001003786	0.844293	0.375295	0.246182	0.00199732	0	0.638409	0.00227771	0.00581164	0.000172735	0	0	0.554488	0.00160737	0.00398495	0	0	92335	chr17	61780192	61819330	2544	-	protein_coding	FLJ90524|LYK5|NY-BR-96|PMSE|STRAD|Stlk	P3614	STE20-related kinase adaptor alpha	NM_001003786
1326	STRADA	NM_001003787	0.763507	0.196461	0.929435	0.540149	0.72793	1.17248	0.850678	0.703159	0.00122167	0.79365	0.658759	1.24872	0.804152	0.626967	0	0.739307	92335	chr17	61780192	61819330	2544	-	protein_coding	FLJ90524|LYK5|NY-BR-96|PMSE|STRAD|Stlk	P3614	STE20-related kinase adaptor alpha	NM_001003787
1327	STRADA	NM_001003788	1.15394	0.299424	3.46806	3.67463	3.21874	3.42961	3.71296	3.48211	3.83856	3.68123	8.34027	9.72458	12.1247	10.1586	13.2412	11.9134	92335	chr17	61780192	61819330	2544	-	protein_coding	FLJ90524|LYK5|NY-BR-96|PMSE|STRAD|Stlk	P3614	STE20-related kinase adaptor alpha	NM_001003788
1328	RABL2B	NM_001003789	1.01264	0.140584	3.75654e-06	0.0181267	0	1.12696e-05	0	0.0364275	0.00292988	0.0148226	0	0	0	0.0254979	0.00199269	0.0105117	11158	chr22	51205920	51222087	2711	-	protein_coding	FLJ93981|FLJ98216	P5852	RAB, member of RAS oncogene family-like 2B	NM_001003789
1329	ERLIN2	NM_001003790	1.01541	0.868988	0.65813	0.680195	0.466818	0.864475	0.614825	0.678706	0.757724	0.599837	0.383855	0.816708	0.531987	0.599684	0.687042	0.520169	11160	chr8	37594097	37615319	6135	+	protein_coding	C8orf2|Erlin-2|MGC87072|NET32|SPFH2	P10766	ER lipid raft associated 2	NM_001003790
1330	ERLIN2	NM_001003791	1	1	0	0	0	0	0	0	0	0	0	0	0	0	0	0	11160	chr8	37594097	37615319	6135	+	protein_coding	C8orf2|Erlin-2|MGC87072|NET32|SPFH2	P10766	ER lipid raft associated 2	NM_001003791
1331	RBMS3	NM_001003792	1.00025	0.888582	0.00154206	0.00190772	0	2.12602e-06	0.00461913	0.0057134	2.2207e-06	0	0	0	0.00321592	0.00395138	0	0	27303	chr3	29322803	30051886	8426	+	protein_coding	FLJ36544	P18008	RNA binding motif single stranded interacting protein 3	NM_001003792
1332	RBMS3	NM_001003793	1.00009	0.957787	0.00150128	0.00162577	0	1.92735e-06	0.00449724	0.00486981	2.01318e-06	0	0	0	0.00313095	0.00336655	0	0	27303	chr3	29322803	30051886	8426	+	protein_coding	FLJ36544	P18008	RNA binding motif single stranded interacting protein 3	NM_001003793
1333	MGLL	NM_001003794	1.06704	0.248165	3.94362	4.03724	4.01153	3.82484	3.98744	3.9627	4.04434	4.10131	15.1787	13.103	14.8757	14.5696	15.42	16.2807	11343	chr3	127407905	127542093	4809	-	protein_coding	HU-K5|HUK5|MAGL|MGL	P10288	monoglyceride lipase	NM_001003794
1334	GTF2IRD2B	NM_001003795	0.9063	0.126519	1.01667	0.874729	1.0673	0.885092	1.08905	0.822335	0.936862	0.862643	1.09919	0.842114	1.12842	0.76689	0.909175	0.825349	389524	chr7	74508347	74565623	3585	+	protein_coding	.	P20262	GTF2I repeat domain containing 2B	NM_001003795
1335	NHP2L1	NM_001003796	0.900558	0.223054	5.67006	5.51895	5.83299	5.58974	5.57248	5.44353	5.62278	5.48437	56.1859	46.9261	46.6315	42.4529	48.0265	44.0933	.	chr22	42069937	42084913	1732	-	.	15.5K|FA-1|FA1|NHPX|OTK27|SNRNP15-5|SNU13|SPAG12|SSFA1	P25087	.	NM_001003796
1336	BICD2	NM_001003800	1.23401	0.0787188	2.54734	2.85069	2.35514	2.5032	2.75507	2.97492	2.76131	2.80697	4.13212	4.6444	5.75636	6.85252	5.75044	6.04148	23299	chr9	95473645	95527083	4625	-	protein_coding	KIAA0699|bA526D8.1	P27730	BICD cargo adaptor 2	NM_001003800
1337	SMARCD3	NM_001003801	0.915499	0.531769	0.739366	0.611996	0.890661	0.837512	0.451367	0.503919	0.44578	0.852004	0.856773	0.783065	0.367848	0.417209	0.359324	0.810888	6604	chr7	150936059	150974231	1920	-	protein_coding	BAF60C|CRACD3|MGC111010|Rsc6p	P860	SWI/SNF related, matrix associated, actin dependent regulator of chromatin, subfamily d, member 3	NM_001003801
1338	SMARCD3	NM_001003802	0.871474	0.374163	0.198745	0.000274933	4.42412e-05	0.52897	0.000245461	0.000398866	0.000425893	0	9.2987e-05	0.441092	0.000188564	0.000247524	0.000196295	0	6604	chr7	150936059	150974231	1920	-	protein_coding	BAF60C|CRACD3|MGC111010|Rsc6p	P860	SWI/SNF related, matrix associated, actin dependent regulator of chromatin, subfamily d, member 3	NM_001003802
1339	ATP5S	NM_001003803	1.26665	0.126306	0.00111508	0.34213	0.0014336	0.00105691	0.000854677	7.19514e-05	0.549435	0.421497	0.00111758	0.000557732	0.000626888	0	0.461424	0.341797	27109	chr14	50779047	50792946	1881	+	protein_coding	ATPW|HSU79253	P31126	ATP synthase, H+ transporting, mitochondrial Fo complex subunit s (factor B)	NM_001003803
1340	ATP5S	NM_001003805	0.76816	0.270278	0.589186	0.208666	0.393973	1.01565	0.235578	0.289058	0.00246483	0.31418	0.315334	1.01802	0.177664	0.221344	0.00126855	0.245871	27109	chr14	50779047	50792946	1881	+	protein_coding	ATPW|HSU79253	P31126	ATP synthase, H+ transporting, mitochondrial Fo complex subunit s (factor B)	NM_001003805
1341	TARP	NM_001003806	0.523791	0.00592127	1.11524	0.182305	0.897133	1.33255	1.08277	0.15	0.254429	0.139671	0.865203	1.5127	1.11904	0.109083	0.190758	0.103985	445347	chr7	38299244	38313248	1027	-	protein_coding	CD3G|TCRG|TCRGC1|TCRGC2	P20693	TCR gamma alternate reading frame protein	NM_001003806
1342	DLGAP1	NM_001003809	1.00017	0.402253	0.000160179	0.000401178	0.000480132	3.50146e-07	0	0.000641761	3.65739e-07	0.000561324	0.00033741	0	0	0.000442317	0	0.000400637	9229	chr18	3496030	4455266	7442	-	protein_coding	DAP-1|DAP-1-ALPHA|DAP-1-BETA|GKAP|MGC88156|SAPAP1|hGKAP	P14229	discs large homolog associated protein 1	NM_001003809
1343	HNRNPD	NM_001003810	0.797797	0.818835	4.2755	3.94959	5.09801	4.441	1.09056	0.824368	1.65017	5.37304	33.3433	20.6242	1.13324	0.765683	2.11345	40.6849	3184	chr4	83274467	83295149	2257	-	protein_coding	AUF1|AUF1A|HNRPD|P37|hnRNPD0	P10675	heterogeneous nuclear ribonucleoprotein D	NM_001003810
1344	TEX11	NM_001003811	0.95856	0.37377	0.0612577	0.000198227	0.000178424	0.000255999	0.176098	0.000214283	0.000243397	0.000136998	0.000143818	0.000147369	0.129975	0.000139478	0.000137492	0.000139239	56159	chrX	69748790	70128567	3140	-	protein_coding	TGC1|TSGA3	P26258	testis expressed 11	NM_001003811
1345	TRIM6	NM_001003818	0.872778	0.276957	0.355201	0.158888	0.486212	0.237413	0.330963	0.0126184	0.000364904	0.422493	0.402092	0.177619	0.258153	0.008679	0	0.342921	117854	chr11	5617331	5634188	3231	+	protein_coding	RNF89	P32355	tripartite motif containing 6	NM_001003818
1346	TRIM6-TRIM34	NM_001003819	1.05182	0.615874	0.115412	0.188302	0.138489	0.200505	0	0.397486	0.138885	0	0.101288	0.148102	0	0.316739	0.100222	0	445372	chr11	5617865	5618144	280	+	protein_coding	IFP1|RNF21|TRIM34	P25076	TRIM6-TRIM34 readthrough	NM_001003819
1347	TRIM34	NM_001003827	1.01101	0.964153	0.789238	0.805041	0.909574	0.739775	0.710241	1.21365	0.94287	0	0.881492	0.666055	0.636811	1.31755	0.917575	0	53840	chr11	5641174	5665625	2394	+	protein_coding	IFP1|RNF21	P1684	tripartite motif containing 34	NM_001003827
1348	PARVB	NM_001003828	1.03626	0.373949	1.06764e-05	0.0513911	0	3.20289e-05	0	9.70916e-06	0.148979	0	0	0	0	0	0.108068	0	29780	chr22	44395091	44565112	2172	+	protein_coding	CGI-56	P7017	parvin beta	NM_001003828
1349	SLC6A19	NM_001003841	1.01219	0.603199	0.0129745	0.0304498	0.0168775	2.68866e-05	0.0219281	8.15033e-06	0.0894789	0	0.0118668	0	0.01535	0	0.0634877	0	340024	chr5	1201710	1225230	5172	+	protein_coding	B0AT1|FLJ20680|FLJ34635|HND	P30628	solute carrier family 6 member 19	NM_001003841
1350	SP5	NM_001003845	1.02641	0.581902	0.0554865	0.0930967	0.0477674	0.0568499	0.061807	0.207091	0.0643496	0	0.0339049	0.0397942	0.0438541	0.154079	0.0451641	0	389058	chr2	171571857	171574498	1947	+	protein_coding	.	P8226	Sp5 transcription factor	NM_001003845
1351	MED15	NM_001003891	1.24811	0.176792	2.80185	3.12159	2.78602	2.40449	3.12569	3.17124	3.18936	2.99641	5.91823	4.2687	7.73543	7.99679	8.08232	7.03166	51586	chr22	20861829	20941919	3904	+	protein_coding	ARC105|CAG7A|CTG7A|DKFZp686A2214|DKFZp762B1216|FLJ42282|FLJ42935|PCQAP|TIG-1|TIG1|TNRC7	P1284	mediator complex subunit 15	NM_001003891
1352	DUPD1	NM_001003892	1	1	0	0	0	0	0	0	0	0	0	0	0	0	0	0	338599	chr10	76797594	76818272	663	-	protein_coding	DUSP27|FMDSP	P28017	dual specificity phosphatase and pro isomerase domain containing 1	NM_001003892
1353	CDY1B	NM_001003895_1	1	1	0	0	0	0	0	0	0	0	0	0	0	0	0	0	253175	chrY	26191377	27771048	6952	-	protein_coding	CDY|CDY1	P358	chromodomain protein, Y-linked, 1B	NM_001003895_1
1354	MANBAL	NM_001003897	1.24991	0.503033	2.39942	2.72124	1.99639	2.32289	2.77282	1.96913	3.23472	2.69031	3.00252	3.98146	5.83978	2.90976	8.37735	5.49368	63905	chr20	35918051	35945663	1315	+	protein_coding	.	P30116	mannosidase beta like	NM_001003897
1355	EVI2A	NM_001003927	1	1	0	0	0	0	0	0	0	0	0	0	0	0	0	0	2123	chr17	29643428	29648767	3010	-	protein_coding	EVDA|EVI-2A|EVI2	P5673	ecotropic viral integration site 2A	NM_001003927
1356	PARP3	NM_001003931	0.916427	0.692917	1.27706	1.15115	1.09147	0.933861	1.6911	0.901162	1.4315	1.06894	1.13523	0.904658	2.23084	0.865874	1.68896	1.10728	10039	chr3	51976321	51982883	2585	+	protein_coding	ADPRT3|ADPRTL2|ADPRTL3|IRT1|PADPRT-3	P2400	poly(ADP-ribose) polymerase family member 3	NM_001003931
1357	TXNDC8	NM_001003936	1	1	0	0	0	0	0	0	0	0	0	0	0	0	0	0	255220	chr9	113065867	113100164	2072	-	protein_coding	SPTRX-3|TRX6|bA427L11.2	P9276	thioredoxin domain containing 8	NM_001003936
1358	TSPYL6	NM_001003937	0.994863	0.691211	0.0212542	0.0138241	0.028949	0.0345754	0	6.62284e-06	2.28207e-05	0.0410526	0.0204111	0.0240153	0	0	0	0.0292686	388951	chr2	54480315	54483409	3095	-	protein_coding	DKFZp434B125	P9382	TSPY-like 6	NM_001003937
1359	HBM	NM_001003938	1	1	0	0	0	0	0	0	0	0	0	0	0	0	0	0	3042	chr16	215973	216767	510	+	protein_coding	HBAP2	P35140	hemoglobin subunit mu	NM_001003938
1360	BMF	NM_001003940	0.521592	0.196442	1.7196	0.780594	1.55087	0.954145	2.32567	1.37177	0.0135555	0.638022	1.936	0.931285	4.01567	1.58543	0.0075198	0.563357	90427	chr15	40380091	40401075	8859	-	protein_coding	FLJ00065	P12404	Bcl2 modifying factor	NM_001003940
1361	OGDH	NM_001003941	0.906899	0.516137	0.658229	0.517242	0.458857	0.52873	0.939091	0.654996	0.602156	0.264302	0.37613	0.439948	0.918102	0.573668	0.51491	0.203794	4967	chr7	44646121	44748669	4393	+	protein_coding	AKGDH|E1k|OGDC	P27821	oxoglutarate dehydrogenase	NM_001003941
1362	BMF	NM_001003942	1.30118	0.376653	0.00313174	0.382953	0.00724128	0.00212659	1.77783e-05	0.000282377	0.934745	0.000397744	0.00520407	0.00126674	4.89569e-05	0.000138173	0.908377	0.000568851	90427	chr15	40380091	40401075	8859	-	protein_coding	FLJ00065	P12404	Bcl2 modifying factor	NM_001003942
1363	BMF	NM_001003943	1.40692	0.141025	0.0418231	0.534367	0.121614	0.000419246	0	0.793329	0.688718	0	0.0885721	0	5.10896e-05	0.732189	0.60912	0.0002994	90427	chr15	40380091	40401075	8859	-	protein_coding	FLJ00065	P12404	Bcl2 modifying factor	NM_001003943
1364	ANXA13	NM_001003954	1.00002	0.373948	5.4817e-09	2.73493e-05	0	1.64451e-08	0	4.9851e-09	8.20415e-05	0	0	0	0	0	5.5437e-05	0	312	chr8	124693034	124749647	1593	-	protein_coding	ANX13|ISA|MGC150460	P9491	annexin A13	NM_001003954
1365	CAPNS1	NM_001003962	0.621592	0.0928395	3.12155	2.43558	3.15491	2.7791	3.36996	1.67744	2.67386	2.73326	7.93096	5.83456	9.34631	2.19339	5.35192	5.69281	826	chr19	36630828	36641255	2073	+	protein_coding	30K|CALPAIN4|CANP|CANPS|CAPN4|CDPS|CSS1	P21859	calpain small subunit 1	NM_001003962
1366	RPLP2	NM_001004	0.79313	0.0440667	10.4931	10.1588	10.6331	10.4538	10.3808	10.0062	10.1467	10.3075	1592.33	1394.59	1333.57	1025.9	1126.8	1275.6	6181	chr11	809936	812876	493	+	protein_coding	D11S2243E|MGC71408|P2|RPP2	P13083	ribosomal protein lateral stalk subunit P2	NM_001004
1367	FBLN2	NM_001004019	0.866832	0.374168	0.206333	0.000157475	0	0.547182	3.90648e-05	0.00011302	0.000359382	0	1.10653e-05	0.45937	4.56387e-05	4.94313e-05	0.000147362	3.12877e-05	2199	chr3	13590625	13679922	4665	+	protein_coding	.	P5492	fibulin 2	NM_001004019
1368	DYRK3	NM_001004023	0.918108	0.374375	0.123467	0.000202156	0	0.000120219	0.342515	0.000269338	0.000337107	0	1.24165e-05	2.74976e-05	0.268214	0.000168902	0.000172218	1.47683e-05	8444	chr1	206808881	206822542	2261	+	protein_coding	DYRK5|RED|REDK|hYAK3-2	P1458	dual specificity tyrosine phosphorylation regulated kinase 3	NM_001004023
1369	GPRASP2	NM_001004051	1.01663	0.962146	1.00387	1.02766	1.09511	0.808194	1.09005	0.000524481	1.69123	0.915699	1.14019	0.746357	1.12994	0	2.22051	0.894045	114928	chrX	101967104	101972661	7260	+	protein_coding	FLJ35662|FLJ37327|GASP2	P21821	G protein-coupled receptor associated sorting protein 2	NM_001004051
1370	OR52B2	NM_001004052	1	1	0	0	0	0	0	0	0	0	0	0	0	0	0	0	255725	chr11	6190585	6191556	972	-	protein_coding	OR11-70	P13462	olfactory receptor family 52 subfamily B member 2	NM_001004052
1371	LRRC29	NM_001004055	1.29687	0.313373	0.356476	0.731512	0.577831	0.000845562	0.430494	0.316267	0.587993	1.1589	0.494491	1.78138e-05	0.348151	0.244509	0.500197	1.23979	26231	chr16	67241042	67260901	1493	-	protein_coding	FBL9|FBXL9	P13367	leucine rich repeat containing 29	NM_001004055
1372	GRK4	NM_001004056	1.00002	0.368525	4.79639e-06	3.94396e-05	0	7.38903e-06	7.00014e-06	8.12645e-09	0.000107402	1.09062e-05	0	4.95084e-06	4.88414e-06	0	7.26221e-05	7.91344e-06	2868	chr4	2965343	3042474	2314	+	protein_coding	GPRK2L|GPRK4|GRK4a|IT11	P4580	G protein-coupled receptor kinase 4	NM_001004056
1373	GRK4	NM_001004057	1.27241	0.374009	0.000224598	0.347784	5.54098e-05	0.000450981	0.000167376	0.862066	0.000251543	0	0.000152956	0.000142504	0.000149178	0.81679	0	0.000143272	2868	chr4	2965343	3042474	2314	+	protein_coding	GPRK2L|GPRK4|GRK4a|IT11	P4580	G protein-coupled receptor kinase 4	NM_001004057
1374	OR8K5	NM_001004058	1	1	0	0	0	0	0	0	0	0	0	0	0	0	0	0	219453	chr11	55926870	55927793	924	-	protein_coding	OR11-174	P8113	olfactory receptor family 8 subfamily K member 5	NM_001004058
1375	OR4S2	NM_001004059	1	1	0	0	0	0	0	0	0	0	0	0	0	0	0	0	219431	chr11	55418380	55419315	936	+	protein_coding	OR11-137|OR4S2P|OST725	P15665	olfactory receptor family 4 subfamily S member 2	NM_001004059
1376	NOMO2	NM_001004060	1.02584	0.683198	3.71354	3.75035	3.76039	3.77101	3.60319	3.82741	3.61662	3.79813	12.5933	12.5895	11.1637	13.1765	11.2062	13.0048	283820	chr16	18511182	18573434	3922	-	protein_coding	Nomo|PM5	P34871	NODAL modulator 2	NM_001004060
1377	OR4K1	NM_001004063	1	1	0	0	0	0	0	0	0	0	0	0	0	0	0	0	79544	chr14	20403767	20404842	1076	+	protein_coding	OR14-19	P1586	olfactory receptor family 4 subfamily K member 1	NM_001004063
1378	OR8J3	NM_001004064	1	1	0	0	0	0	0	0	0	0	0	0	0	0	0	0	81168	chr11	55904247	55905194	948	-	protein_coding	OR11-173	P32819	olfactory receptor family 8 subfamily J member 3	NM_001004064
1379	AKAP2	NM_001004065	1.00002	0.764996	7.09746e-05	0.00010106	0	1.0666e-07	0.000212807	0.000213081	1.1141e-07	8.998e-05	0	0	0.000148152	0.000146719	0	6.46841e-05	11217	chr9	112810878	112934791	7098	+	protein_coding	AKAPKL|FLJ53197|PALM2|PRKA2	P12304	A-kinase anchoring protein 2	NM_001004065
1380	NOMO3	NM_001004067	0.953297	0.369341	2.80897	2.73996	2.83719	2.86405	2.72173	2.82697	2.74526	2.6417	6.16659	6.25002	5.60219	6.08673	5.67504	5.28145	408050	chr16	16326389	16388668	4316	+	protein_coding	Nomo	P33305	NODAL modulator 3	NM_001004067
1381	GRK6	NM_001004105	0.694164	0.121328	3.97857	3.45192	4.12543	3.83983	3.95609	3.9548	3.10902	3.12006	16.5039	13.2541	14.5338	14.4857	7.58144	7.76099	2870	chr5	176853687	176869850	4174	+	protein_coding	FLJ32135|GPRK6	P24222	G protein-coupled receptor kinase 6	NM_001004105
1382	GRK6	NM_001004106	1.00217	0.986275	4.63054	4.63366	4.85441	4.65283	4.33817	4.45607	4.7573	4.67119	28.0182	24.037	19.246	20.9164	25.9133	24.6574	2870	chr5	176853687	176869850	4174	+	protein_coding	FLJ32135|GPRK6	P24222	G protein-coupled receptor kinase 6	NM_001004106
1383	OR4P4	NM_001004124	1	1	0	0	0	0	0	0	0	0	0	0	0	0	0	0	81300	chr11	55405834	55406772	939	+	protein_coding	OR4P3P	P1865	olfactory receptor family 4 subfamily P member 4	NM_001004124
1384	TUSC1	NM_001004125	0.844835	0.0769517	3.46328	3.22002	3.51618	3.43939	3.43278	3.26016	3.37353	3.00162	10.4748	9.80041	9.80795	8.56764	9.31583	7.06626	286319	chr9	25676387	25678856	2470	-	protein_coding	MGC131751|TSG-9|TSG9	P10607	tumor suppressor candidate 1	NM_001004125
1385	ALG11	NM_001004127	1.00942	0.931994	2.67394	2.68747	2.4759	2.65884	2.86132	2.80887	2.478	2.75422	4.57965	5.28843	6.27256	5.9986	4.54567	5.78878	440138	chr13	52586523	52603780	2565	+	protein_coding	GT8|KIAA0266|UTP14C	P24695	ALG11, alpha-1,2-mannosyltransferase	NM_001004127
1386	QSOX1	NM_001004128	1.3041	0.0850844	4.03321	4.41627	4.31341	4.01987	3.70195	4.52387	4.40741	4.30953	18.9444	15.1431	12.0266	21.9735	20.1196	18.9659	5768	chr1	180123968	180167169	2583	+	protein_coding	FLJ34858|Q6|QSCN6	P7460	quiescin sulfhydryl oxidase 1	NM_001004128
1387	OR10AD1	NM_001004134	0.981598	0.703111	0.0802524	0.0534561	0.109395	0.128074	0	2.56238e-05	8.82922e-05	0.154667	0.0791782	0.0921706	0	0	0	0.114283	121275	chr12	48596122	48597075	954	-	protein_coding	OR10AD1P|OR12-1	P1170	olfactory receptor family 10 subfamily AD member 1	NM_001004134
1388	OR2A12	NM_001004135	1	1	0	0	0	0	0	0	0	0	0	0	0	0	0	0	346525	chr7	143792201	143793133	933	+	protein_coding	OR2A12P|OR2A16P	P32601	olfactory receptor family 2 subfamily A member 12	NM_001004135
1389	OR2T2	NM_001004136	1	1	0	0	0	0	0	0	0	0	0	0	0	0	0	0	401992	chr1	248616099	248617073	975	+	protein_coding	OR1-43|OR2T2P	P7354	olfactory receptor family 2 subfamily T member 2	NM_001004136
1390	OR52M1	NM_001004137	1	1	0	0	0	0	0	0	0	0	0	0	0	0	0	0	119772	chr11	4566421	4567374	954	+	protein_coding	OR11-11|OR52M1P|OR52M3P	P3814	olfactory receptor family 52 subfamily M member 1	NM_001004137
1391	OR4F4	NM_001004195	1	1	0	0	0	0	0	0	0	0	0	0	0	0	0	0	26682	chr15	102462345	102463262	918	-	protein_coding	OLA-7501|OR4F18	P2059	olfactory receptor family 4 subfamily F member 4	NM_001004195
1392	CD200	NM_001004196	1	1	0	0	0	0	0	0	0	0	0	0	0	0	0	0	4345	chr3	112051916	112081658	2290	+	protein_coding	MOX1|MOX2|MRC|OX-2	P26198	CD200 molecule	NM_001004196
1393	OR13A1	NM_001004297	1	1	0	0	0	0	0	0	0	0	0	0	0	0	0	0	79290	chr10	45798102	45811056	2078	-	protein_coding	FLJ16797	P24655	olfactory receptor family 13 subfamily A member 1	NM_001004297
1394	C10orf90	NM_001004298	0.993552	0.650799	0.0242596	0.0149266	0	0.0347554	0.0377193	0.0442998	2.53212e-05	0	0	0.0241404	0.02654	0.0310951	0	0	118611	chr10	128113574	128210010	3080	-	protein_coding	FLJ32938|bA422P15.2	P27928	chromosome 10 open reading frame 90	NM_001004298
1395	ZNF813	NM_001004301	1.12838	0.0633443	1.96675	2.14101	1.82832	1.98615	2.07505	2.1426	2.11822	2.16187	2.56082	2.94636	3.21674	3.4105	3.32434	3.50011	126017	chr19	53970989	53997546	4188	+	protein_coding	FLJ16542|FLJ34141	P8863	zinc finger protein 813	NM_001004301
1396	C1orf168	NM_001004303	1	1	0	0	0	0	0	0	0	0	0	0	0	0	0	0	199920	chr1	57184477	57285369	3460	-	protein_coding	FLJ43208	P11358	chromosome 1 open reading frame 168	NM_001004303
1397	ZNF740	NM_001004304	0.952081	0.161914	4.08087	4.01002	4.10822	4.03422	4.09903	4.07769	3.96986	3.98004	16.3	15.3076	16.1523	15.8615	14.592	14.8909	283337	chr12	53574535	53584654	4256	+	protein_coding	MGC61706|Zfp740	P30073	zinc finger protein 740	NM_001004304
1398	CCDC144NL	NM_001004306	1.0256	0.373421	0.0981158	0.13459	0.0635727	0.147303	0.0821252	0.1419	0.0856215	0.174843	0.0453675	0.106713	0.058683	0.103125	0.0605591	0.130143	339184	chr17	20766708	20799453	2806	-	protein_coding	MGC87631	P13047	coiled-coil domain containing 144 family, N-terminal like	NM_001004306
1399	ZCCHC16	NM_001004308	0.992954	0.373887	0.0102038	2.8551e-06	0.0303913	6.35563e-06	0	1.92662e-06	6.63867e-06	0	0.0214289	0	0	0	0	0	340595	chrX	111326253	111700473	2958	+	protein_coding	FLJ46608|Mar4|Mart4	P29117	zinc finger CCHC-type containing 16	NM_001004308
1400	ZNF774	NM_001004309	1.11875	0.281851	1.49196	1.65385	1.62809	1.41383	1.42366	1.43375	1.79436	1.7093	2.09812	1.65516	1.68447	1.69864	2.4566	2.28639	342132	chr15	90895477	90904715	1838	+	protein_coding	MGC75360	P24642	zinc finger protein 774	NM_001004309
1401	FCRL6	NM_001004310	0.986907	0.374019	0.0190188	5.25908e-06	0	0.0563204	0	3.54883e-06	1.22284e-05	0	0	0.0394778	0	0	0	0	343413	chr1	159770301	159786047	2799	+	protein_coding	FLJ16056|FcRH6	P27215	Fc receptor like 6	NM_001004310
1402	FIGLA	NM_001004311	1	1	0	0	0	0	0	0	0	0	0	0	0	0	0	0	344018	chr2	71004442	71017775	722	-	protein_coding	BHLHC8|FIGALPHA|POF6	P28576	folliculogenesis specific bHLH transcription factor	NM_001004311
1403	RTP2	NM_001004312	1	1	0	0	0	0	0	0	0	0	0	0	0	0	0	0	344892	chr3	187416047	187420345	1346	-	protein_coding	MGC78665	P7829	receptor (chemosensory) transporter protein 2	NM_001004312
1404	TMEM220	NM_001004313	0.991215	0.771667	0.0684253	0.0556956	0.0289396	0.101224	0.0741895	0.0441357	8.17054e-05	0.120297	0.0204324	0.0721207	0.0528589	0.0309657	0	0.0878975	388335	chr17	10616639	10633646	3092	-	protein_coding	.	P11573	transmembrane protein 220	NM_001004313
1405	LEKR1	NM_001004316	0.966485	0.266683	0.0673704	0.0181889	0.107198	0.0925876	0	1.63255e-05	5.62532e-05	0.0538231	0.0775143	0.0657704	0	0	0	0.0385395	389170	chr3	156544096	156763918	4085	+	protein_coding	FLJ16641|FLJ37161	P14421	leucine, glutamate and lysine rich 1	NM_001004316
1406	LIN28B	NM_001004317	1	1	0	0	0	0	0	0	0	0	0	0	0	0	0	0	389421	chr6	105404923	105531207	5505	+	protein_coding	CSDD2|FLJ16517	P1583	lin-28 homolog B	NM_001004317
1407	PAPL	NM_001004318	1.13785	0.033042	0.377526	0.563839	0.446135	0.266766	0.413422	0.603931	0.573954	0.512116	0.363893	0.201445	0.332258	0.51903	0.48586	0.42977	.	chr19	39574945	39602128	2961	+	.	FLJ16165	P34873	.	NM_001004318
1408	VHLL	NM_001004319	1.04505	0.726549	0.0883294	0.151908	0	0.000154189	0.250123	0.414678	0.000161055	0	0	0	0.189524	0.332531	0	0	391104	chr1	156268415	156269428	1014	-	protein_coding	VHLP|VLP	P12118	von Hippel-Lindau tumor suppressor like	NM_001004319
1409	AGMO	NM_001004320	1	1	0	0	0	0	0	0	0	0	0	0	0	0	0	0	392636	chr7	15239943	15601640	2475	-	protein_coding	.	P26837	alkylglycerol monooxygenase	NM_001004320
1410	C7orf61	NM_001004323	1.23773	0.0693204	0.191806	0.499497	0.198534	0.120902	0.252938	0.292722	0.670306	0.510762	0.14838	0.0864415	0.191912	0.224474	0.588635	0.428092	402573	chr7	100054238	100061894	1004	-	protein_coding	.	P29931	chromosome 7 open reading frame 61	NM_001004323
1411	KRTAP5-2	NM_001004325	0.973468	0.856334	1.20403	1.16524	1.35156	1.33434	0.878133	1.41751	1.02676	1.01394	1.55691	1.51423	0.839049	1.66889	1.03115	1.02832	440021	chr11	1618407	1619524	1118	-	protein_coding	KRTAP5-8|KRTAP5.2	P1674	keratin associated protein 5-2	NM_001004325
1412	SLC22A20	NM_001004326	0.886475	0.172345	0.398843	0.224994	0.255085	0.54348	0.383452	0.102368	0.277292	0.287905	0.194343	0.455256	0.304806	0.0732761	0.210394	0.223089	440044	chr11	64981311	65010228	2892	+	protein_coding	FLJ16331|FLJ37246|Oat6	P2593	solute carrier family 22 member 20	NM_001004326
1413	ZNF705A	NM_001004328	0.978834	0.374019	0.0308729	8.57935e-06	0	0.0907047	0	5.78935e-06	1.99486e-05	0	0	0.0644151	0	0	0	0	440077	chr12	8325150	8332642	3438	+	protein_coding	FLJ16353	P14993	zinc finger protein 705A	NM_001004328
1414	DBX2	NM_001004329	1	1	0	0	0	0	0	0	0	0	0	0	0	0	0	0	440097	chr12	45408539	45444882	2722	-	protein_coding	FLJ16139	P14844	developing brain homeobox 2	NM_001004329
1415	PLEKHG7	NM_001004330	1.01842	0.117577	5.42838e-06	0.0263344	0	1.62851e-05	0	0.0416296	0.0370137	0	0	0	0	0.0291939	0.0257289	0	440107	chr12	93130265	93165868	3267	+	protein_coding	FLJ46688	P13741	pleckstrin homology and RhoGEF domain containing G7	NM_001004330
1416	RNASEK	NM_001004333	1.01857	0.856156	6.73395	6.7605	6.75372	6.80363	6.63964	6.49051	6.93157	6.8237	107.268	110.167	98.8039	88.7809	120.453	113.098	440400	chr17	6915736	6917852	1024	+	protein_coding	MGC48891|MGC71993	.	ribonuclease K	NM_001004333
1417	GPR179	NM_001004334	1.09445	0.140065	3.68603	3.81625	3.77811	3.55943	3.71193	3.88378	3.783	3.77951	12.7614	10.7334	12.1158	13.7415	12.6999	12.826	440435	chr17	36481493	36499693	7980	-	protein_coding	GPR158L1	P10451	G protein-coupled receptor 179	NM_001004334
1418	ZYG11A	NM_001004339	1.08846	0.050778	2.22415	2.34644	2.1622	2.26113	2.24715	2.30379	2.40753	2.32591	3.48835	3.77438	3.75117	3.93154	4.28394	4.04354	440590	chr1	53308183	53360247	4271	+	protein_coding	ZYG11	P10287	zyg-11 family member A, cell cycle regulator	NM_001004339
1419	FCGR1B	NM_001004340	0.995445	0.887697	0.0641924	0.0576064	0.114707	7.68648e-05	0.0754512	0.0883131	8.02879e-05	0.0827448	0.0831658	0	0.0537808	0.0629707	0	0.0597634	2210	chr1	120926128	120935944	3156	-	protein_coding	CD64|IGFRB	P29323	Fc fragment of IgG receptor Ib	NM_001004340
1420	ETV3L	NM_001004341	1.01492	0.373949	4.38891e-06	0.0213771	0	1.31667e-05	0	3.9913e-06	0.0632	0	0	0	0	0	0.0444018	0	440695	chr1	157061835	157069600	1977	-	protein_coding	FLJ16478	P3263	ETS variant 3 like	NM_001004341
1421	TRIM67	NM_001004342	1.01474	0.430613	0.116818	0.137923	0.0981763	0.149807	0.101895	0.104846	0.144223	0.164072	0.0708385	0.108616	0.073306	0.0751832	0.104314	0.121715	440730	chr1	231298674	231357314	8336	+	protein_coding	FLJ44831|TNL	P24959	tripartite motif containing 67	NM_001004342
1422	MAP1LC3C	NM_001004343	1.08834	0.534618	0.297189	0.419314	0.237565	0.435452	0.207778	0.125766	0.400618	0.678716	0.179943	0.350331	0.155161	0.0907838	0.318087	0.604723	440738	chr1	242158792	242162385	1192	-	protein_coding	ATG8J|LC3C	P9468	microtubule associated protein 1 light chain 3 gamma	NM_001004343
1423	SPDYE3	NM_001004351	1.1789	0.0973125	0.407351	0.644793	0.351331	0.507694	0.357534	0.536817	0.564298	0.816485	0.27711	0.419244	0.281635	0.449973	0.475841	0.766291	441272	chr7	99905325	99919819	3185	+	protein_coding	MGC119294|MGC57359	P16665	speedy/RINGO cell cycle regulator family member E3	NM_001004351
1424	LOC100506422	NM_001004352	1	1	0	0	0	0	0	0	0	0	0	0	0	0	0	0	100506422	chr9	26066673	26118406	2320	+	protein_coding	.	P34154	putative deoxyuridine 5'-triphosphate nucleotidohydrolase-like protein FLJ16323	NM_001004352
1425	C9orf173	NM_001004353	0.99998	0.117113	2.84629e-05	7.84671e-09	4.06363e-05	4.47519e-05	0	5.29496e-09	1.82452e-08	0	2.86623e-05	3.02205e-05	0	0	0	0	.	chr9	140145713	140147935	1762	+	.	FLJ40246	.	.	NM_001004353
1426	NRARP	NM_001004354	1.09494	0.0374922	4.95712	5.08797	4.88879	5.00756	4.97245	5.0917	5.12946	5.04139	28.7233	31.0137	30.4242	33.0509	33.8314	32.1661	441478	chr9	140194083	140196703	2621	-	protein_coding	MGC61598	P7059	NOTCH-regulated ankyrin repeat protein	NM_001004354
1427	FGFRL1	NM_001004356	1.20832	0.538808	3.66335	3.93636	3.88653	4.0765	2.66654	3.90512	3.53212	4.27639	13.8351	15.7971	5.35613	13.961	10.51	18.5016	53834	chr4	1005610	1020686	3332	+	protein_coding	FGFR5|FHFR	P24192	fibroblast growth factor receptor-like 1	NM_001004356
1428	FGFRL1	NM_001004358	1.00001	0.958625	0.0307467	0.030766	0.030564	0.0311905	0.0304853	0.0307143	0.0312565	0.030327	0.0215677	0.02162	0.0214008	0.0214472	0.0216559	0.0215874	53834	chr4	1005610	1020686	3332	+	protein_coding	FGFR5|FHFR	P24192	fibroblast growth factor receptor-like 1	NM_001004358
1429	DPP10	NM_001004360	1	1	0	0	0	0	0	0	0	0	0	0	0	0	0	0	57628	chr2	115199899	116602311	6203	+	protein_coding	DPL2|DPPY|DPRP3	P17418	dipeptidyl peptidase like 10	NM_001004360
1430	UMODL1	NM_001004416	1.02502	0.259559	0.0402611	0.0759181	0.053095	0.021418	0.0460788	0.106414	0.0948134	0.0251972	0.0377347	0.0147494	0.03252	0.0763736	0.0673689	0.0179601	89766	chr21	43483068	43563105	5134	+	protein_coding	.	P34943	uromodulin like 1	NM_001004416
1431	CLEC2D	NM_001004419	0.900982	0.432176	0.712549	0.562119	0.639086	0.54043	0.929294	0.358787	0.518349	0.77791	0.559477	0.451557	0.905145	0.281665	0.429415	0.720029	29121	chr12	9822304	9852151	5366	+	protein_coding	CLAX|LLT1|OCIL	P9202	C-type lectin domain family 2 member D	NM_001004419
1432	PLA2G6	NM_001004426	1.60538	0.305857	0.0010652	0.683979	0.000334793	0.00209824	0.00076197	0.00167331	1.39727	0.244295	0.000486272	0.001068	0.000602281	0.00104325	1.62889	0.186678	8398	chr22	38507502	38577836	3190	-	protein_coding	CaI-PLA2|GVI|INAD1|IPLA2-VIA|NBIA2A|NBIA2B|PARK14|PLA2|PNPLA9|iPLA2	P34307	phospholipase A2 group VI	NM_001004426
1433	METRNL	NM_001004431	1.0082	0.836818	6.56966	6.58145	6.65617	6.54413	6.50435	6.632	6.53654	6.5742	100.188	91.8649	89.8698	98.035	91.3569	94.9798	284207	chr17	81037567	81052871	1612	+	protein_coding	MGC99788	P29069	meteorin, glial cell differentiation regulator-like	NM_001004431
1434	LINGO4	NM_001004432	1.04173	0.25194	0.081986	0.140968	0	0.155138	0.0866398	0.149512	0.133194	0.140151	0	0.112724	0.0620032	0.108956	0.0959559	0.103144	339398	chr1	151772740	151777918	2667	-	protein_coding	DAAT9248|LRRN6D|PRO34002	P15069	leucine rich repeat and Ig domain containing 4	NM_001004432
1435	SLC30A2	NM_001004434	0.999975	0.373887	3.54821e-05	9.9859e-09	0.000106421	2.22293e-08	0	6.73848e-09	2.32192e-08	0	7.49356e-05	0	0	0	0	0	7780	chr1	26364513	26372629	2499	-	protein_coding	FLJ36708|MGC11303|PP12488|ZNT2|ZnT-2	P18262	solute carrier family 30 member 2	NM_001004434
1436	ITGA11	NM_001004439	1.00206	0.880911	0.0214941	0.0244624	0	0.0415158	0.0226673	8.65756e-06	0.0237614	0.0491976	0	0.0289159	0.0158714	0	0.0164098	0.0351571	22801	chr15	68594042	68724492	5009	-	protein_coding	HsT18964	P33337	integrin subunit alpha 11	NM_001004439
1437	FAM19A3	NM_001004440	0.999957	0.373887	6.26246e-05	1.76085e-08	0.000187826	3.91977e-08	0	1.18822e-08	4.09434e-08	0	0.000132137	0	0	0	0	0	284467	chr1	113263189	113269856	1258	+	protein_coding	MGC138473|TAFA-3|TAFA3	P6151	family with sequence similarity 19 (chemokine (C-C motif)-like), member A3	NM_001004440
1438	ANKRD34B	NM_001004441	1.20646	0.0663485	0.400131	0.670908	0.341837	0.336412	0.514907	0.821967	0.532499	0.643375	0.268734	0.260608	0.429404	0.766746	0.443686	0.566405	340120	chr5	79852574	79866304	3935	-	protein_coding	DP58	P22489	ankyrin repeat domain 34B	NM_001004441
1439	OR1B1	NM_001004450	1	1	0	0	0	0	0	0	0	0	0	0	0	0	0	0	347169	chr9	125390858	125391814	957	-	protein_coding	OR9-26|OR9-B	P26760	olfactory receptor family 1 subfamily B member 1 (gene/pseudogene)	NM_001004450
1440	OR1J1	NM_001004451	1.1545	0.211926	4.57248e-05	0.207316	0	0.00013717	0	0.435827	0.000143279	0.151638	0	0	0	0.352206	0	0.112004	347168	chr9	125239237	125240205	969	-	protein_coding	OR9-18|hg32	P23865	olfactory receptor family 1 subfamily J member 1	NM_001004451
1441	OR1J4	NM_001004452	1.04028	0.465586	0.0491721	0.10614	0	9.82442e-05	0.142668	0.166028	0.146744	0	0	0	0.104086	0.121723	0.106298	0	26219	chr9	125281420	125282361	942	+	protein_coding	HSHTPCRX01|HTPCRX01|OR9-21	P27715	olfactory receptor family 1 subfamily J member 4	NM_001004452
1442	OR1L6	NM_001004453	1	1	0	0	0	0	0	0	0	0	0	0	0	0	0	0	392390	chr9	125512127	125513062	936	+	protein_coding	HG16|OR1L7|OR9-30	P1281	olfactory receptor family 1 subfamily L member 6	NM_001004453
1443	OR1L8	NM_001004454	1	1	0	0	0	0	0	0	0	0	0	0	0	0	0	0	138881	chr9	125329827	125330756	930	-	protein_coding	OR9-24	P16623	olfactory receptor family 1 subfamily L member 8	NM_001004454
1444	OR1M1	NM_001004456	1	1	0	0	0	0	0	0	0	0	0	0	0	0	0	0	125963	chr19	9203921	9204862	942	+	protein_coding	OR19-5|OR19-6	P24980	olfactory receptor family 1 subfamily M member 1	NM_001004456
1445	OR1N2	NM_001004457	1	1	0	0	0	0	0	0	0	0	0	0	0	0	0	0	138882	chr9	125315449	125316441	993	+	protein_coding	OR9-23	P19484	olfactory receptor family 1 subfamily N member 2	NM_001004457
1446	OR1S1	NM_001004458	1	1	0	0	0	0	0	0	0	0	0	0	0	0	0	0	219959	chr11	57982217	57983194	978	+	protein_coding	OR11-232|OST034	P29008	olfactory receptor family 1 subfamily S member 1 (gene/pseudogene)	NM_001004458
1447	OR1S2	NM_001004459	1	1	0	0	0	0	0	0	0	0	0	0	0	0	0	0	219958	chr11	57970676	57971653	978	-	protein_coding	OR11-231	P5228	olfactory receptor family 1 subfamily S member 2	NM_001004459
1448	OR10A2	NM_001004460	1	1	0	0	0	0	0	0	0	0	0	0	0	0	0	0	341276	chr11	6890986	6891897	912	+	protein_coding	OR10A2P|OR11-82|OR11-86|OST363	P3819	olfactory receptor family 10 subfamily A member 2	NM_001004460
1449	OR10A6	NM_001004461	0.966643	0.373888	0.0489584	1.38019e-05	0	3.07237e-05	0.142128	9.31351e-06	3.2092e-05	0	0	0	0.103661	0	0	0	390093	chr11	7949265	7950209	945	-	protein_coding	OR11-96	P18046	olfactory receptor family 10 subfamily A member 6 (gene/pseudogene)	NM_001004461
1450	OR10G4	NM_001004462	1	1	0	0	0	0	0	0	0	0	0	0	0	0	0	0	390264	chr11	123886282	123887217	936	+	protein_coding	OR11-278	P851	olfactory receptor family 10 subfamily G member 4	NM_001004462
1451	OR10G7	NM_001004463	1	1	0	0	0	0	0	0	0	0	0	0	0	0	0	0	390265	chr11	123908773	123909708	936	-	protein_coding	OR11-283	P18871	olfactory receptor family 10 subfamily G member 7	NM_001004463
1452	OR10G8	NM_001004464	1	1	0	0	0	0	0	0	0	0	0	0	0	0	0	0	219869	chr11	123900330	123901265	936	+	protein_coding	OR11-274|OR11-282	P13052	olfactory receptor family 10 subfamily G member 8	NM_001004464
1453	OR10H4	NM_001004465	1	1	0	0	0	0	0	0	0	0	0	0	0	0	0	0	126541	chr19	16059818	16060768	951	+	protein_coding	OR19-28	P21003	olfactory receptor family 10 subfamily H member 4	NM_001004465
1454	OR10H5	NM_001004466	1	1	0	0	0	0	0	0	0	0	0	0	0	0	0	0	284433	chr19	15904859	15905806	948	+	protein_coding	OR19-25|OR19-26	P22881	olfactory receptor family 10 subfamily H member 5	NM_001004466
1455	OR10J3	NM_001004467	1	1	0	0	0	0	0	0	0	0	0	0	0	0	0	0	441911	chr1	159283460	159284449	990	-	protein_coding	OR1-25|OR10J3P	P8821	olfactory receptor family 10 subfamily J member 3	NM_001004467
1456	OR10J5	NM_001004469	1	1	0	0	0	0	0	0	0	0	0	0	0	0	0	0	127385	chr1	159504868	159505797	930	-	protein_coding	OR1-28	P25630	olfactory receptor family 10 subfamily J member 5	NM_001004469
1457	ST8SIA6	NM_001004470	1.50474	0.000717904	3.02671	3.61622	2.95729	3.12097	2.99677	3.68665	3.55104	3.60775	6.79202	7.65892	6.98959	11.8599	10.6682	11.2688	338596	chr10	17362676	17496254	1398	-	protein_coding	SIA8F|SIAT8F|ST8SIA-VI	P25271	ST8 alpha-N-acetylneuraminate alpha-2,8-sialyltransferase 6	NM_001004470
1458	OR10Q1	NM_001004471	1	1	0	0	0	0	0	0	0	0	0	0	0	0	0	0	219960	chr11	57995354	57996390	1037	-	protein_coding	OR11-233	P18533	olfactory receptor family 10 subfamily Q member 1	NM_001004471
1459	OR10R2	NM_001004472	1	1	0	0	0	0	0	0	0	0	0	0	0	0	0	0	343406	chr1	158449668	158450675	1008	+	protein_coding	OR1-8|OR10R2Q	P18459	olfactory receptor family 10 subfamily R member 2	NM_001004472
1460	OR10K1	NM_001004473	1	1	0	0	0	0	0	0	0	0	0	0	0	0	0	0	391109	chr1	158435352	158436293	942	+	protein_coding	OR1-6	P14230	olfactory receptor family 10 subfamily K member 1	NM_001004473
1461	OR10S1	NM_001004474	1	1	0	0	0	0	0	0	0	0	0	0	0	0	0	0	219873	chr11	123847403	123848398	996	-	protein_coding	OR11-279	P31589	olfactory receptor family 10 subfamily S member 1	NM_001004474
1462	OR10T2	NM_001004475	1.01895	0.880699	0.359465	0.386544	0.110368	0.643693	0.271456	0.448169	0.279008	0.426647	0.0801482	0.559701	0.207323	0.363682	0.211741	0.347086	128360	chr1	158368312	158369256	945	-	protein_coding	OR1-3	P34747	olfactory receptor family 10 subfamily T member 2	NM_001004475
1463	OR10K2	NM_001004476	0.987042	0.883849	0.179741	0.160925	0	0.250057	0.273561	0.166715	0.000231744	0.300241	0	0.188081	0.20903	0.122223	0	0.233313	391107	chr1	158389718	158390656	939	-	protein_coding	OR1-4	P18670	olfactory receptor family 10 subfamily K member 2	NM_001004476
1464	OR10X1	NM_001004477	1	1	0	0	0	0	0	0	0	0	0	0	0	0	0	0	128367	chr1	158548709	158549689	981	-	protein_coding	OR1-13|OR1-14|OR10X1P	P23407	olfactory receptor family 10 subfamily X member 1 (gene/pseudogene)	NM_001004477
1465	OR10Z1	NM_001004478	1	1	0	0	0	0	0	0	0	0	0	0	0	0	0	0	128368	chr1	158576229	158577170	942	+	protein_coding	OR1-15	P8598	olfactory receptor family 10 subfamily Z member 1	NM_001004478
1466	OR11H4	NM_001004479	1	1	0	0	0	0	0	0	0	0	0	0	0	0	0	0	390442	chr14	20710951	20711925	975	+	protein_coding	OR14-36	P30566	olfactory receptor family 11 subfamily H member 4	NM_001004479
1467	OR11H6	NM_001004480	1	1	0	0	0	0	0	0	0	0	0	0	0	0	0	0	122748	chr14	20691869	20692861	993	+	protein_coding	.	P6128	olfactory receptor family 11 subfamily H member 6	NM_001004480
1468	OR13C2	NM_001004481	1	1	0	0	0	0	0	0	0	0	0	0	0	0	0	0	392376	chr9	107366952	107367908	957	-	protein_coding	OR37K	P19184	olfactory receptor family 13 subfamily C member 2	NM_001004481
1469	OR13C5	NM_001004482	1	1	0	0	0	0	0	0	0	0	0	0	0	0	0	0	138799	chr9	107360738	107361694	957	-	protein_coding	OR9-11	P24657	olfactory receptor family 13 subfamily C member 5	NM_001004482
1470	OR13C8	NM_001004483	1	1	0	0	0	0	0	0	0	0	0	0	0	0	0	0	138802	chr9	107331449	107332411	963	+	protein_coding	OR37H|OR9-10	P11627	olfactory receptor family 13 subfamily C member 8	NM_001004483
1471	OR13D1	NM_001004484	1	1	0	0	0	0	0	0	0	0	0	0	0	0	0	0	286365	chr9	107456703	107457743	1041	+	protein_coding	OR9-15	P1637	olfactory receptor family 13 subfamily D member 1	NM_001004484
1472	OR13F1	NM_001004485	1	1	0	0	0	0	0	0	0	0	0	0	0	0	0	0	138805	chr9	107266544	107267503	960	+	protein_coding	OR9-6	P13320	olfactory receptor family 13 subfamily F member 1	NM_001004485
1473	OR13H1	NM_001004486	1.03919	0.37381	1.17185e-05	0.0554655	0	3.51551e-05	0	1.06568e-05	3.67207e-05	0.16034	0	0	0	0	0	0.118628	347468	chrX	130678048	130678974	927	+	protein_coding	ORX1	P35485	olfactory receptor family 13 subfamily H member 1	NM_001004486
1474	OR13J1	NM_001004487	1	1	0	0	0	0	0	0	0	0	0	0	0	0	0	0	392309	chr9	35869460	35870398	939	-	protein_coding	OR9-2	P30084	olfactory receptor family 13 subfamily J member 1	NM_001004487
1475	OR2A25	NM_001004488	1	1	0	0	0	0	0	0	0	0	0	0	0	0	0	0	392138	chr7	143771313	143772245	933	+	protein_coding	OR2A24P|OR2A25P|OR2A27	P6974	olfactory receptor family 2 subfamily A member 25	NM_001004488
1476	OR2AG1	NM_001004489	1	1	0	0	0	0	0	0	0	0	0	0	0	0	0	0	144125	chr11	6806248	6807245	998	+	protein_coding	OR11-79|OR2AG3	P20708	olfactory receptor family 2 subfamily AG member 1 (gene/pseudogene)	NM_001004489
1477	OR2AG2	NM_001004490	1	1	0	0	0	0	0	0	0	0	0	0	0	0	0	0	338755	chr11	6789238	6790188	951	-	protein_coding	OR11-76|OR2AG2P	P26688	olfactory receptor family 2 subfamily AG member 2	NM_001004490
1478	OR2AK2	NM_001004491	1	1	0	0	0	0	0	0	0	0	0	0	0	0	0	0	391191	chr1	248128634	248129641	1008	+	protein_coding	OR1-47|OR2AK1P	P7111	olfactory receptor family 2 subfamily AK member 2	NM_001004491
1479	OR2B11	NM_001004492	1	1	0	0	0	0	0	0	0	0	0	0	0	0	0	0	127623	chr1	247614331	247615284	954	-	protein_coding	.	P5991	olfactory receptor family 2 subfamily B member 11	NM_001004492
1480	OR2D3	NM_001004684	1	1	0	0	0	0	0	0	0	0	0	0	0	0	0	0	120775	chr11	6942233	6943225	993	+	protein_coding	OR11-89	P11983	olfactory receptor family 2 subfamily D member 3	NM_001004684
1481	OR2F2	NM_001004685	1	1	0	0	0	0	0	0	0	0	0	0	0	0	0	0	135948	chr7	143632326	143633279	954	+	protein_coding	OR7-1	P7779	olfactory receptor family 2 subfamily F member 2	NM_001004685
1482	OR2L2	NM_001004686	1	1	0	0	0	0	0	0	0	0	0	0	0	0	0	0	26246	chr1	248201474	248202607	1134	+	protein_coding	HSHTPCRH07|HTPCRH07|OR1-48|OR2L12|OR2L4P	P13531	olfactory receptor family 2 subfamily L member 2	NM_001004686
1483	OR2L3	NM_001004687	1	1	0	0	0	0	0	0	0	0	0	0	0	0	0	0	391192	chr1	248223984	248224922	939	+	protein_coding	.	P22589	olfactory receptor family 2 subfamily L member 3	NM_001004687
1484	OR2M2	NM_001004688	1	1	0	0	0	0	0	0	0	0	0	0	0	0	0	0	391194	chr1	248343288	248344331	1044	+	protein_coding	OR2M2Q|OST423	P12600	olfactory receptor family 2 subfamily M member 2	NM_001004688
1485	OR2M3	NM_001004689	1	1	0	0	0	0	0	0	0	0	0	0	0	0	0	0	127062	chr1	248366370	248367308	939	+	protein_coding	OR1-54|OR2M3P|OR2M6|OST003	P12669	olfactory receptor family 2 subfamily M member 3	NM_001004689
1486	OR2M5	NM_001004690	1	1	0	0	0	0	0	0	0	0	0	0	0	0	0	0	127059	chr1	248308450	248309388	939	+	protein_coding	OR2M5P	P32315	olfactory receptor family 2 subfamily M member 5	NM_001004690
1487	OR2M7	NM_001004691	1	1	0	0	0	0	0	0	0	0	0	0	0	0	0	0	391196	chr1	248486932	248487870	939	-	protein_coding	OR1-58	P11048	olfactory receptor family 2 subfamily M member 7	NM_001004691
1488	OR2T12	NM_001004692	1	1	0	0	0	0	0	0	0	0	0	0	0	0	0	0	127064	chr1	248457918	248458880	963	-	protein_coding	OR1-57	P24341	olfactory receptor family 2 subfamily T member 12	NM_001004692
1489	OR2T10	NM_001004693	1	1	0	0	0	0	0	0	0	0	0	0	0	0	0	0	127069	chr1	248756131	248757069	939	-	protein_coding	OR1-64	P1198	olfactory receptor family 2 subfamily T member 10	NM_001004693
1490	OR2T29	NM_001004694	1	1	0	0	0	0	0	0	0	0	0	0	0	0	0	0	343563	chr1	248721845	248722792	948	-	protein_coding	.	P33945	olfactory receptor family 2 subfamily T member 29	NM_001004694
1491	OR2T33	NM_001004695	1	1	0	0	0	0	0	0	0	0	0	0	0	0	0	0	391195	chr1	248436154	248437116	963	-	protein_coding	OR1-56	P24432	olfactory receptor family 2 subfamily T member 33	NM_001004695
1492	OR2T4	NM_001004696	1	1	0	0	0	0	0	0	0	0	0	0	0	0	0	0	127074	chr1	248524883	248525929	1047	+	protein_coding	OR1-60|OR2T4Q	P36051	olfactory receptor family 2 subfamily T member 4	NM_001004696
1493	OR2T5	NM_001004697	1	1	0	0	0	0	0	0	0	0	0	0	0	0	0	0	401993	chr1	248651890	248652837	948	+	protein_coding	OR1-62	P3116	olfactory receptor family 2 subfamily T member 5	NM_001004697
1494	OR2W5	NM_001004698	1	1	0	0	0	0	0	0	0	0	0	0	0	0	0	0	441932	chr1	247654370	247655711	1342	+	protein_coding	OR2W5P|OST722	P33682	olfactory receptor family 2 subfamily W member 5 (gene/pseudogene)	NM_001004698
1495	OR2Z1	NM_001004699	1	1	0	0	0	0	0	0	0	0	0	0	0	0	0	0	284383	chr19	8841316	8842371	1056	+	protein_coding	OR19-4|OR2Z2	P3244	olfactory receptor family 2 subfamily Z member 1	NM_001004699
1496	OR4C11	NM_001004700	1	1	0	0	0	0	0	0	0	0	0	0	0	0	0	0	219429	chr11	55370830	55371874	1045	-	protein_coding	OR11-136|OR4C11P	P22010	olfactory receptor family 4 subfamily C member 11	NM_001004700
1497	OR4C16	NM_001004701	1	1	0	0	0	0	0	0	0	0	0	0	0	0	0	0	219428	chr11	55339604	55340536	933	+	protein_coding	OR11-135	P2414	olfactory receptor family 4 subfamily C member 16 (gene/pseudogene)	NM_001004701
1498	OR4C3	NM_001004702	1	1	0	0	0	0	0	0	0	0	0	0	0	0	0	0	256144	chr11	48346493	48347482	990	+	protein_coding	OR11-98	P11552	olfactory receptor family 4 subfamily C member 3	NM_001004702
1499	OR4C46	NM_001004703	1	1	0	0	0	0	0	0	0	0	0	0	0	0	0	0	119749	chr11	51515282	51516211	930	+	protein_coding	.	P15144	olfactory receptor family 4 subfamily C member 46	NM_001004703
1500	OR4C6	NM_001004704	1	1	0	0	0	0	0	0	0	0	0	0	0	0	0	0	219432	chr11	55432643	55433572	930	+	protein_coding	OR11-138	P20937	olfactory receptor family 4 subfamily C member 6	NM_001004704
1501	OR4D10	NM_001004705	1	1	0	0	0	0	0	0	0	0	0	0	0	0	0	0	390197	chr11	59244903	59245838	936	+	protein_coding	OR11-251|OR4D10P|OST711	P26578	olfactory receptor family 4 subfamily D member 10	NM_001004705
1502	OR4D11	NM_001004706	1	1	0	0	0	0	0	0	0	0	0	0	0	0	0	0	219986	chr11	59271049	59271984	936	+	protein_coding	OR4D11P	P7522	olfactory receptor family 4 subfamily D member 11	NM_001004706
1503	OR4D2	NM_001004707	1	1	0	0	0	0	0	0	0	0	0	0	0	0	0	0	124538	chr17	56247017	56247940	924	+	protein_coding	BC2009|OR17-24	P4136	olfactory receptor family 4 subfamily D member 2	NM_001004707
1504	OR4D6	NM_001004708	1	1	0	0	0	0	0	0	0	0	0	0	0	0	0	0	219983	chr11	59224434	59225378	945	+	protein_coding	OR11-250	P26541	olfactory receptor family 4 subfamily D member 6	NM_001004708
1505	OR4D9	NM_001004711	1	1	0	0	0	0	0	0	0	0	0	0	0	0	0	0	390199	chr11	59282386	59283330	945	+	protein_coding	OR11-253	P3100	olfactory receptor family 4 subfamily D member 9	NM_001004711
1506	OR4K14	NM_001004712	1	1	0	0	0	0	0	0	0	0	0	0	0	0	0	0	122740	chr14	20482420	20483352	933	-	protein_coding	OR14-18|OR14-22	P33442	olfactory receptor family 4 subfamily K member 14	NM_001004712
1507	OR1I1	NM_001004713	1	1	0	0	0	0	0	0	0	0	0	0	0	0	0	0	126370	chr19	15197877	15198944	1068	+	protein_coding	OR19-20|OR1I1P|OR1I1Q	P11996	olfactory receptor family 1 subfamily I member 1	NM_001004713
1508	OR4K13	NM_001004714	1	1	0	0	0	0	0	0	0	0	0	0	0	0	0	0	390433	chr14	20502003	20502917	915	-	protein_coding	OR14-27	P25988	olfactory receptor family 4 subfamily K member 13	NM_001004714
1509	OR4K17	NM_001004715	1	1	0	0	0	0	0	0	0	0	0	0	0	0	0	0	390436	chr14	20585566	20586597	1032	+	protein_coding	OR14-29	P29237	olfactory receptor family 4 subfamily K member 17	NM_001004715
1510	OR4L1	NM_001004717	1.03581	0.373949	1.05442e-05	0.0507666	0	3.16324e-05	0	9.58896e-06	0.147227	0	0	0	0	0	0.106729	0	122742	chr14	20528204	20529142	939	+	protein_coding	OR14-28|OR4L2P	P24281	olfactory receptor family 4 subfamily L member 1	NM_001004717
1511	OR4M2	NM_001004719	1	1	0	0	0	0	0	0	0	0	0	0	0	0	0	0	390538	chr15	22368478	22369561	1084	+	protein_coding	OR15-3	P23804	olfactory receptor family 4 subfamily M member 2	NM_001004719
1512	NCK2	NM_001004720	0.821429	0.373929	0.283908	0.000117142	0	0.00019267	0.724504	5.84072e-05	0.00020125	9.17653e-05	0	0	0.652796	0	0	0.000270061	8440	chr2	106361520	106510730	2667	+	protein_coding	GRB4|NCKbeta	P6772	NCK adaptor protein 2	NM_001004720
1513	NCK2	NM_001004722	1.3125	0.0259344	1.86875	2.26106	1.76976	1.76881	2.0492	2.28398	2.1289	2.36074	2.41933	2.39385	3.14189	3.86469	3.35636	4.16441	8440	chr2	106361520	106510730	2667	+	protein_coding	GRB4|NCKbeta	P6772	NCK adaptor protein 2	NM_001004722
1514	OR4N2	NM_001004723	1	1	0	0	0	0	0	0	0	0	0	0	0	0	0	0	390429	chr14	20271929	20296531	1008	+	protein_coding	OR14-13|OR14-8	P8047	olfactory receptor family 4 subfamily N member 2	NM_001004723
1515	OR4N5	NM_001004724	1	1	0	0	0	0	0	0	0	0	0	0	0	0	0	0	390437	chr14	20611895	20612821	927	+	protein_coding	.	P23491	olfactory receptor family 4 subfamily N member 5	NM_001004724
1516	OR4S1	NM_001004725	1	1	0	0	0	0	0	0	0	0	0	0	0	0	0	0	256148	chr11	48327775	48328704	930	+	protein_coding	OR11-100	P15410	olfactory receptor family 4 subfamily S member 1	NM_001004725
1517	OR4X1	NM_001004726	1.03969	0.37381	1.18688e-05	0.0561659	0	3.5606e-05	0	1.07935e-05	3.71916e-05	0.162292	0	0	0	0	0	0.120151	390113	chr11	48285413	48286330	918	+	protein_coding	OR11-104	P23167	olfactory receptor family 4 subfamily X member 1 (gene/pseudogene)	NM_001004726
1518	OR4X2	NM_001004727	1	1	0	0	0	0	0	0	0	0	0	0	0	0	0	0	119764	chr11	48266656	48267567	912	+	protein_coding	OR11-105	P2296	olfactory receptor family 4 subfamily X member 2 (gene/pseudogene)	NM_001004727
1519	OR5A1	NM_001004728	1	1	0	0	0	0	0	0	0	0	0	0	0	0	0	0	219982	chr11	59210642	59211589	948	+	protein_coding	OR11-249|OR5A1P|OST181	P23929	olfactory receptor family 5 subfamily A member 1	NM_001004728
1520	OR5AN1	NM_001004729	1	1	0	0	0	0	0	0	0	0	0	0	0	0	0	0	390195	chr11	59131932	59132867	936	+	protein_coding	OR11-244	P19619	olfactory receptor family 5 subfamily AN member 1	NM_001004729
1521	OR5AR1	NM_001004730	1	1	0	0	0	0	0	0	0	0	0	0	0	0	0	0	219493	chr11	56431162	56432094	933	+	protein_coding	OR11-209	P27648	olfactory receptor family 5 subfamily AR member 1 (gene/pseudogene)	NM_001004730
1522	OR5AU1	NM_001004731	1	1	0	0	0	0	0	0	0	0	0	0	0	0	0	0	390445	chr14	21623096	21624184	1089	-	protein_coding	OR14-38	P29133	olfactory receptor family 5 subfamily AU member 1	NM_001004731
1523	OR5B12	NM_001004733	0.977373	0.373887	0.0330275	9.29513e-06	0.0968779	2.06915e-05	0	6.27235e-06	2.1613e-05	0	0.0697927	0	0	0	0	0	390191	chr11	58206593	58207646	1054	-	protein_coding	OR11-241|OR5B12P|OR5B16|OST743	P7760	olfactory receptor family 5 subfamily B member 12	NM_001004733
1524	OR14I1	NM_001004734	1	1	0	0	0	0	0	0	0	0	0	0	0	0	0	0	401994	chr1	248844670	248845605	936	-	protein_coding	OR5BU1|OR5BU1P	P15996	olfactory receptor family 14 subfamily I member 1	NM_001004734
1525	OR5D14	NM_001004735	1	1	0	0	0	0	0	0	0	0	0	0	0	0	0	0	219436	chr11	55563032	55563976	945	+	protein_coding	OR11-141|OR11-150	P21911	olfactory receptor family 5 subfamily D member 14	NM_001004735
1526	OR5K1	NM_001004736	1	1	0	0	0	0	0	0	0	0	0	0	0	0	0	0	26339	chr3	98188324	98189420	1097	+	protein_coding	HSHTPCRX10|HTPCRX10|OR3-8	P5021	olfactory receptor family 5 subfamily K member 1	NM_001004736
1527	OR5K2	NM_001004737	1	1	0	0	0	0	0	0	0	0	0	0	0	0	0	0	402135	chr3	98216525	98217475	951	+	protein_coding	OR3-9	P24847	olfactory receptor family 5 subfamily K member 2	NM_001004737
1528	OR5L1	NM_001004738	1	1	0	0	0	0	0	0	0	0	0	0	0	0	0	0	219437	chr11	55578943	55579878	936	+	protein_coding	OR11-151|OST262	P27212	olfactory receptor family 5 subfamily L member 1 (gene/pseudogene)	NM_001004738
1529	OR5L2	NM_001004739	1	1	0	0	0	0	0	0	0	0	0	0	0	0	0	0	26338	chr11	55594695	55595630	936	+	protein_coding	HSHTPCRX16|HTPCRX16|OR11-153	P17798	olfactory receptor family 5 subfamily L member 2	NM_001004739
1530	OR5M1	NM_001004740	1.00888	0.866226	0.0443043	0.0570521	0	0.129029	0	0.164745	6.6081e-05	0	0	0.0929096	0	0.120736	0	0	390168	chr11	56380031	56380978	948	-	protein_coding	OR11-208|OST050	P17800	olfactory receptor family 5 subfamily M member 1	NM_001004740
1531	OR5M10	NM_001004741	1	1	0	0	0	0	0	0	0	0	0	0	0	0	0	0	390167	chr11	56344250	56345197	948	-	protein_coding	OR11-207	P27399	olfactory receptor family 5 subfamily M member 10	NM_001004741
1532	OR5M3	NM_001004742	1	1	0	0	0	0	0	0	0	0	0	0	0	0	0	0	219482	chr11	56236964	56238014	1051	-	protein_coding	OR11-191	P14057	olfactory receptor family 5 subfamily M member 3	NM_001004742
1533	OR5M9	NM_001004743	1.0361	0.373949	1.06305e-05	0.0511743	0	3.18912e-05	0	9.66742e-06	0.148371	0	0	0	0	0	0.107603	0	390162	chr11	56229945	56230877	933	-	protein_coding	OR11-190	P4779	olfactory receptor family 5 subfamily M member 9	NM_001004743
1534	OR5R1	NM_001004744	1	1	0	0	0	0	0	0	0	0	0	0	0	0	0	0	219479	chr11	56184734	56185708	975	-	protein_coding	OR11-185|OR5R1P	P7587	olfactory receptor family 5 subfamily R member 1 (gene/pseudogene)	NM_001004744
1535	OR5T1	NM_001004745	1.0386	0.373851	1.14176e-05	0.0546494	0	3.42524e-05	0	0.158072	3.57778e-05	0	0	0	0	0.115578	0	0	390155	chr11	56043115	56044095	981	+	protein_coding	OR11-179|OR5T1P	P1906	olfactory receptor family 5 subfamily T member 1	NM_001004745
1536	OR5T2	NM_001004746	1	1	0	0	0	0	0	0	0	0	0	0	0	0	0	0	219464	chr11	55999582	56000661	1080	-	protein_coding	OR11-177	P28131	olfactory receptor family 5 subfamily T member 2	NM_001004746
1537	OR5T3	NM_001004747	1	1	0	0	0	0	0	0	0	0	0	0	0	0	0	0	390154	chr11	56019676	56020698	1023	+	protein_coding	OR11-178|OR5T3Q	P32913	olfactory receptor family 5 subfamily T member 3	NM_001004747
1538	OR51A2	NM_001004748	1	1	0	0	0	0	0	0	0	0	0	0	0	0	0	0	401667	chr11	4976002	4976943	942	-	protein_coding	.	P21419	olfactory receptor family 51 subfamily A member 2	NM_001004748
1539	OR51A7	NM_001004749	1	1	0	0	0	0	0	0	0	0	0	0	0	0	0	0	119687	chr11	4928600	4929538	939	+	protein_coding	OR11-27	P23318	olfactory receptor family 51 subfamily A member 7	NM_001004749
1540	OR51B6	NM_001004750	1	1	0	0	0	0	0	0	0	0	0	0	0	0	0	0	390058	chr11	5372738	5373676	939	+	protein_coding	HOR5'Beta6	P18291	olfactory receptor family 51 subfamily B member 6	NM_001004750
1541	OR51D1	NM_001004751	1	1	0	0	0	0	0	0	0	0	0	0	0	0	0	0	390038	chr11	4660945	4662068	1124	+	protein_coding	OR11-14|OR51D1Q	P2900	olfactory receptor family 51 subfamily D member 1	NM_001004751
1542	OR51F1	NM_001004752	1	1	0	0	0	0	0	0	0	0	0	0	0	0	0	0	256892	chr11	4790209	4791147	939	-	protein_coding	OR11-21|OR51F1P	P10201	olfactory receptor family 51 subfamily F member 1 (gene/pseudogene)	NM_001004752
1543	OR51F2	NM_001004753	1	1	0	0	0	0	0	0	0	0	0	0	0	0	0	0	119694	chr11	4842616	4843644	1029	+	protein_coding	OR11-23	P25047	olfactory receptor family 51 subfamily F member 2	NM_001004753
1544	OR51I2	NM_001004754	0.949179	0.374019	0.0752694	2.12632e-05	0	0.214962	0	1.43484e-05	4.94408e-05	0	0	0.159774	0	0	0	0	390064	chr11	5474638	5475707	1070	+	protein_coding	OR11-38	P25445	olfactory receptor family 51 subfamily I member 2	NM_001004754
1545	OR51L1	NM_001004755	1	1	0	0	0	0	0	0	0	0	0	0	0	0	0	0	119682	chr11	5020213	5021160	948	+	protein_coding	OR11-31	P9243	olfactory receptor family 51 subfamily L member 1	NM_001004755
1546	OR51M1	NM_001004756	1	1	0	0	0	0	0	0	0	0	0	0	0	0	0	0	390059	chr11	5410607	5411664	1058	+	protein_coding	HOR5'Beta7|OR11-40	P1225	olfactory receptor family 51 subfamily M member 1	NM_001004756
1547	OR51Q1	NM_001004757	1.00545	0.897999	0.0370947	0.0449366	0	0.10854	0	1.55695e-05	5.36484e-05	0.130754	0	0.0775699	0	0	0	0.0958229	390061	chr11	5443341	5444436	1096	+	protein_coding	.	P28346	olfactory receptor family 51 subfamily Q member 1 (gene/pseudogene)	NM_001004757
1548	OR51S1	NM_001004758	1	1	0	0	0	0	0	0	0	0	0	0	0	0	0	0	119692	chr11	4869467	4870438	972	-	protein_coding	OR11-24	P29902	olfactory receptor family 51 subfamily S member 1	NM_001004758
1549	OR51T1	NM_001004759	1	1	0	0	0	0	0	0	0	0	0	0	0	0	0	0	401665	chr11	4903049	4904113	1065	+	protein_coding	OR11-26	P24135	olfactory receptor family 51 subfamily T member 1	NM_001004759
1550	OR51V1	NM_001004760	1	1	0	0	0	0	0	0	0	0	0	0	0	0	0	0	283111	chr11	5220965	5221930	966	-	protein_coding	OR11-36|OR51A12	P23156	olfactory receptor family 51 subfamily V member 1	NM_001004760
1551	RPS3	NM_001005	0.698027	0.050827	8.31852	7.79987	8.4888	8.26744	8.18168	7.51537	7.7027	8.11499	359.418	305.632	289.634	181.682	206.248	278.268	6188	chr11	75110535	75133345	4141	+	protein_coding	FLJ26283|FLJ27450|MGC87870	P349	ribosomal protein S3	NM_001005
1552	OR52A5	NM_001005160	1	1	0	0	0	0	0	0	0	0	0	0	0	0	0	0	390054	chr11	5152922	5153872	951	-	protein_coding	OR11-33	P27340	olfactory receptor family 52 subfamily A member 5	NM_001005160
1553	OR52B4	NM_001005161	1	1	0	0	0	0	0	0	0	0	0	0	0	0	0	0	143496	chr11	4388493	4389616	1124	-	protein_coding	OR11-3	P10046	olfactory receptor family 52 subfamily B member 4 (gene/pseudogene)	NM_001005161
1554	OR52B6	NM_001005162	1	1	0	0	0	0	0	0	0	0	0	0	0	0	0	0	340980	chr11	5602107	5603114	1008	+	protein_coding	OR11-47	P19553	olfactory receptor family 52 subfamily B member 6	NM_001005162
1555	OR52D1	NM_001005163	1	1	0	0	0	0	0	0	0	0	0	0	0	0	0	0	390066	chr11	5509915	5510978	1064	+	protein_coding	OR11-43	P29044	olfactory receptor family 52 subfamily D member 1	NM_001005163
1556	OR52E2	NM_001005164	1	1	0	0	0	0	0	0	0	0	0	0	0	0	0	0	119678	chr11	5079880	5080857	978	-	protein_coding	.	P22230	olfactory receptor family 52 subfamily E member 2	NM_001005164
1557	OR52E4	NM_001005165	1.07152	0.373949	2.10699e-05	0.0996849	0	6.32087e-05	0	1.9161e-05	0.280487	0	0	0	0	0	0.213459	0	390081	chr11	5905523	5906461	939	+	protein_coding	OR11-55	P27484	olfactory receptor family 52 subfamily E member 4	NM_001005165
1558	OR52E6	NM_001005167	1	1	0	0	0	0	0	0	0	0	0	0	0	0	0	0	390078	chr11	5862186	5863127	942	-	protein_coding	OR11-58	P22438	olfactory receptor family 52 subfamily E member 6	NM_001005167
1559	OR52E8	NM_001005168	1	1	0	0	0	0	0	0	0	0	0	0	0	0	0	0	390079	chr11	5877979	5878932	954	-	protein_coding	OR11-54	P29862	olfactory receptor family 52 subfamily E member 8	NM_001005168
1560	OR52I1	NM_001005169	1	1	0	0	0	0	0	0	0	0	0	0	0	0	0	0	390037	chr11	4615269	4616243	975	+	protein_coding	OR11-13	P26951	olfactory receptor family 52 subfamily I member 1	NM_001005169
1561	OR52I2	NM_001005170	1	1	0	0	0	0	0	0	0	0	0	0	0	0	0	0	143502	chr11	4608021	4609135	1115	+	protein_coding	OR11-12	P6888	olfactory receptor family 52 subfamily I member 2	NM_001005170
1562	OR52K1	NM_001005171	1	1	0	0	0	0	0	0	0	0	0	0	0	0	0	0	390036	chr11	4510109	4511138	1030	+	protein_coding	OR11-8	P13182	olfactory receptor family 52 subfamily K member 1	NM_001005171
1563	OR52K2	NM_001005172	1	1	0	0	0	0	0	0	0	0	0	0	0	0	0	0	119774	chr11	4470525	4471591	1067	+	protein_coding	OR11-7	P1131	olfactory receptor family 52 subfamily K member 2	NM_001005172
1564	OR52L1	NM_001005173	1	1	0	0	0	0	0	0	0	0	0	0	0	0	0	0	338751	chr11	6007122	6008215	1094	-	protein_coding	OR11-50	P16251	olfactory receptor family 52 subfamily L member 1	NM_001005173
1565	OR52N2	NM_001005174	1	1	0	0	0	0	0	0	0	0	0	0	0	0	0	0	390077	chr11	5841566	5842531	966	+	protein_coding	OR11-57	P23032	olfactory receptor family 52 subfamily N member 2	NM_001005174
1566	OR52N4	NM_001005175	1	1	0	0	0	0	0	0	0	0	0	0	0	0	0	0	390072	chr11	5775923	5776959	1037	+	protein_coding	OR11-64	P10775	olfactory receptor family 52 subfamily N member 4 (gene/pseudogene)	NM_001005175
1567	SP140	NM_001005176	1	1	0	0	0	0	0	0	0	0	0	0	0	0	0	0	11262	chr2	231090445	231177930	3557	+	protein_coding	LYSP100|LYSP100-A|LYSP100-B|MGC126440	P35963	SP140 nuclear body protein	NM_001005176
1568	OR52R1	NM_001005177	1	1	0	0	0	0	0	0	0	0	0	0	0	0	0	0	119695	chr11	4824663	4825610	948	-	protein_coding	OR11-22	P1847	olfactory receptor family 52 subfamily R member 1 (gene/pseudogene)	NM_001005177
1569	OR52W1	NM_001005178	1	1	0	0	0	0	0	0	0	0	0	0	0	0	0	0	120787	chr11	6220454	6221416	963	+	protein_coding	OR11-71|OR52W1P	P17314	olfactory receptor family 52 subfamily W member 1	NM_001005178
1570	OR56A4	NM_001005179	1	1	0	0	0	0	0	0	0	0	0	0	0	0	0	0	120793	chr11	6023281	6024378	1098	-	protein_coding	OR11-49	P8973	olfactory receptor family 56 subfamily A member 4	NM_001005179
1571	OR56B1	NM_001005180	1	1	0	0	0	0	0	0	0	0	0	0	0	0	0	0	387748	chr11	5757678	5758768	1091	+	protein_coding	OR11-65|OR56B1P	P18359	olfactory receptor family 56 subfamily B member 1	NM_001005180
1572	OR56B4	NM_001005181	1	1	0	0	0	0	0	0	0	0	0	0	0	0	0	0	196335	chr11	6128914	6130065	1152	+	protein_coding	OR11-67	P35673	olfactory receptor family 56 subfamily B member 4	NM_001005181
1573	OR6C1	NM_001005182	1	1	0	0	0	0	0	0	0	0	0	0	0	0	0	0	390321	chr12	55714384	55715322	939	+	protein_coding	OST267	P3540	olfactory receptor family 6 subfamily C member 1	NM_001005182
1574	OR6C76	NM_001005183	1	1	0	0	0	0	0	0	0	0	0	0	0	0	0	0	390326	chr12	55820038	55820976	939	+	protein_coding	.	P12515	olfactory receptor family 6 subfamily C member 76	NM_001005183
1575	OR6K6	NM_001005184	1	1	0	0	0	0	0	0	0	0	0	0	0	0	0	0	128371	chr1	158724606	158725637	1032	+	protein_coding	OR1-21	P34261	olfactory receptor family 6 subfamily K member 6	NM_001005184
1576	OR6N1	NM_001005185	1	1	0	0	0	0	0	0	0	0	0	0	0	0	0	0	128372	chr1	158735534	158736472	939	-	protein_coding	OR1-22	P31446	olfactory receptor family 6 subfamily N member 1	NM_001005185
1577	OR6Q1	NM_001005186	1	1	0	0	0	0	0	0	0	0	0	0	0	0	0	0	219952	chr11	57798425	57799378	954	+	protein_coding	OR11-226	P27083	olfactory receptor family 6 subfamily Q member 1 (gene/pseudogene)	NM_001005186
1578	OR6T1	NM_001005187	1	1	0	0	0	0	0	0	0	0	0	0	0	0	0	0	219874	chr11	123813574	123814545	972	-	protein_coding	OR11-277	P4415	olfactory receptor family 6 subfamily T member 1	NM_001005187
1579	OR6X1	NM_001005188	1	1	0	0	0	0	0	0	0	0	0	0	0	0	0	0	390260	chr11	123624288	123625226	939	-	protein_coding	OR11-270	P3029	olfactory receptor family 6 subfamily X member 1	NM_001005188
1580	OR6Y1	NM_001005189	1	1	0	0	0	0	0	0	0	0	0	0	0	0	0	0	391112	chr1	158516918	158517895	978	-	protein_coding	OR1-11|OR6Y2	P28751	olfactory receptor family 6 subfamily Y member 1	NM_001005189
1581	OR7A10	NM_001005190	1	1	0	0	0	0	0	0	0	0	0	0	0	0	0	0	390892	chr19	14951760	14952689	930	-	protein_coding	BC85395_3|OR19-18	P5175	olfactory receptor family 7 subfamily A member 10	NM_001005190
1582	OR7D4	NM_001005191	1	1	0	0	0	0	0	0	0	0	0	0	0	0	0	0	125958	chr19	9324526	9325547	1022	-	protein_coding	OR19-7|OR19-B|OR19B|OR7D4P|hg105	P15856	olfactory receptor family 7 subfamily D member 4	NM_001005191
1583	OR7G1	NM_001005192	1	1	0	0	0	0	0	0	0	0	0	0	0	0	0	0	125962	chr19	9225504	9226439	936	-	protein_coding	OR19-15|OR19-8|OR7G1P	P10237	olfactory receptor family 7 subfamily G member 1	NM_001005192
1584	OR7G2	NM_001005193	1	1	0	0	0	0	0	0	0	0	0	0	0	0	0	0	390882	chr19	9212945	9213982	1038	-	protein_coding	OR19-6|OST260	P7580	olfactory receptor family 7 subfamily G member 2	NM_001005193
1585	OR8A1	NM_001005194	0.997571	0.975754	0.237981	0.234472	0.204208	0.124101	0.374223	0.15817	0.383724	0.149069	0.152808	0.0889859	0.296458	0.115578	0.30298	0.110245	390275	chr11	124439965	124440945	981	+	protein_coding	OR11-318|OST025	P7221	olfactory receptor family 8 subfamily A member 1	NM_001005194
1586	OR8B12	NM_001005195	1.03886	0.37381	1.16204e-05	0.0550083	0	3.48608e-05	0	1.05676e-05	3.64133e-05	0.159064	0	0	0	0	0	0.117634	219858	chr11	124412618	124413550	933	-	protein_coding	OR11-317	P10453	olfactory receptor family 8 subfamily B member 12	NM_001005195
1587	OR8B4	NM_001005196	1	1	0	0	0	0	0	0	0	0	0	0	0	0	0	0	283162	chr11	124293838	124294767	930	-	protein_coding	OR11-315|OR8B4P	P2269	olfactory receptor family 8 subfamily B member 4 (gene/pseudogene)	NM_001005196
1588	OR8D4	NM_001005197	1	1	0	0	0	0	0	0	0	0	0	0	0	0	0	0	338662	chr11	123777139	123778083	945	+	protein_coding	OR11-275	P2688	olfactory receptor family 8 subfamily D member 4	NM_001005197
1589	OR8G5	NM_001005198	0.833576	0.229973	0.806061	0.543446	0.885869	0.735257	0.793041	0.403265	0.886261	0.264802	0.85062	0.661123	0.733456	0.321747	0.844128	0.204436	219865	chr11	124134723	124135763	1041	+	protein_coding	OR11-298|OR8G5P|OR8G6	P1565	olfactory receptor family 8 subfamily G member 5	NM_001005198
1590	OR8H1	NM_001005199	1	1	0	0	0	0	0	0	0	0	0	0	0	0	0	0	219469	chr11	56057603	56058538	936	-	protein_coding	OR11-180	P25559	olfactory receptor family 8 subfamily H member 1	NM_001005199
1591	OR8H2	NM_001005200	1	1	0	0	0	0	0	0	0	0	0	0	0	0	0	0	390151	chr11	55872519	55873457	939	+	protein_coding	OR11-171	P11900	olfactory receptor family 8 subfamily H member 2	NM_001005200
1592	OR8H3	NM_001005201	1	1	0	0	0	0	0	0	0	0	0	0	0	0	0	0	390152	chr11	55889849	55890787	939	+	protein_coding	OR11-172	P24478	olfactory receptor family 8 subfamily H member 3	NM_001005201
1593	OR8K3	NM_001005202	1	1	0	0	0	0	0	0	0	0	0	0	0	0	0	0	219473	chr11	56085783	56086721	939	+	protein_coding	OR11-181	P3229	olfactory receptor family 8 subfamily K member 3 (gene/pseudogene)	NM_001005202
1594	OR8S1	NM_001005203	1	1	0	0	0	0	0	0	0	0	0	0	0	0	0	0	341568	chr12	48919415	48921886	1080	+	protein_coding	.	P11004	olfactory receptor family 8 subfamily S member 1	NM_001005203
1595	OR8U1	NM_001005204	1	1	0	0	0	0	0	0	0	0	0	0	0	0	0	0	219417	chr11	56143100	56144029	930	+	protein_coding	.	P30613	olfactory receptor family 8 subfamily U member 1	NM_001005204
[truncated: 49,624 more rows]

## Sheet: info
	Information
Seq	mRNA-Seq
organism	Human
build	hg19(UCSC)
[truncated: 27 more rows]
